# Supplementary material for: Genome-scale analysis of Acetobacterium bakii reveals the cold adaptation of psychrotolerant acetogens by post-transcriptional regulation
Source: RNA. 2018 Dec;24(12):1839–55. doi: 10.1261/rna.068239.118 (PMC6239172; doi:10.1261/rna.068239.118)
Supplement: Supplemental Material [file supp_068239.118_Supplemental_Table_S4.xlsx]

## Sheet: Sheet1
	Table S4. mRNA expression profiles according to conditions in A. bakii.
	Scaffold	Start	End	Strand	Groups	20H	20A	10H	10A	Locus_tag	Description
	Scaffold1	1	312	+	N/A	0.390666	0.60122	1.83004	0.881021	ABAKI_c00010	ABC transport system ATP-binding protein
	Scaffold1	322	666	+	N/A	2.344	0	3.11076	3.1379	ABAKI_c00020	Transport permease protein
	Scaffold1	857	1063	+	N/A	1.90966	0.60122	1.747	4.00081	ABAKI_c00030	Transport permease protein
	Scaffold1	1057	1551	+	N/A	4.94764	5.53703	12.0278	7.21114	ABAKI_c00040	ABC transport system permease protein
	Scaffold1	1548	2048	+	N/A	6.76996	4.57217	9.38337	7.15682	ABAKI_c00050	ABC transport system permease protein
	Scaffold1	2107	2421	+	N/A	69.9173	57.7049	99.7134	78.3388	ABAKI_c00060	Transcriptional regulator LuxR family
	Scaffold1	2387	4708	+	C3	254.288	218.923	54.8055	30.8298	ABAKI_c00070	Transcriptional regulator LuxR family
	Scaffold1	4745	5365	+	C4	94.1752	103.259	747.807	261.604	ABAKI_c00080	Maf-like protein Awo_c20600
	Scaffold1	5613	6029	-	C4	102.508	135.153	907.688	1235.06	ABAKI_c00090	Uncharacterized protein
	Scaffold1	6468	7064	+	C4	80.2033	75.0845	700.424	393.74	ABAKI_c00100	Uncharacterized protein
	Scaffold1	7181	7813	+	C4	80.116	58.5024	676.401	278.923	ABAKI_c00110	Methylase involved in ubiquinone/menaquinone biosynthesis
	Scaffold1	8042	8308	-	C4	72.6957	51.0915	255.638	209.865	ABAKI_c00120	Transcriptional regulator, AraC family
	Scaffold1	8602	8916	+	C4	262.648	265.804	1519.69	2986.68	ABAKI_c00130	Uncharacterized protein
	Scaffold1	8957	10147	+	C4	1493.49	1312.47	8600.06	19191.6	ABAKI_c00140	Anaerobic nitric oxide reductase flavorubredoxin
	Scaffold1	10370	10606	-	C4	14.0616	7.34069	272.395	187.749	ABAKI_c00150	DNA repair helicase, truncation, putative
	Scaffold1	10551	10862	-	C4	50.4738	47.4284	703.481	471.192	ABAKI_c00160	DEAD_2 domain protein
	Scaffold1	10954	11586	-	C4	59.3281	41.9471	945.682	616.332	ABAKI_c00170	DEAD_2 domain protein
	Scaffold1	11614	12726	-	C4	203.54	107.048	1545.67	941.677	ABAKI_c00180	DEAD_2 domain protein
	Scaffold1	12821	13948	-	C12	85.2796	21.3093	189.223	202.34	ABAKI_c00190	Probable sulfate permease (SulP)
	Scaffold1	14225	14362	+	C4	17.6649	14.6256	233.865	224.945	ABAKI_c00200	PhoP family transcriptional regulator
	Scaffold1	14310	14924	+	C4	84.4546	47.7217	333.828	413.31	ABAKI_c00210	Uncharacterized transcriptional regulatory protein YcbL
	Scaffold1	14927	16330	+	C4	241.738	160.448	1469.53	1484.55	ABAKI_c00220	Sensor histidine kinase
	Scaffold1	16444	17055	+	C4	102.467	83.7682	679.815	861.613	ABAKI_c00230	Heavy metal translocating P-type ATPase
	Scaffold1	17135	17710	+	C4	1543.47	1620.8	4965.94	6768.97	ABAKI_c00240	Flavoredoxin
	Scaffold1	17898	18461	+	C4	20.9189	38.5774	139.613	105.976	ABAKI_c00250	Transcriptional regulator TetR family
	Scaffold1	18609	19772	+	C4	29.2952	59.1594	86.6157	62.9934	ABAKI_c00260	Aldo/keto reductase
	Scaffold1	19818	20732	-	N/A	153.634	127.519	164.717	191.75	ABAKI_c00270	2-dehydropantoate 2-reductase
	Scaffold1	20914	21294	+	N/A	141.57	142.2	129.409	89.5023	ABAKI_c00280	Uncharacterized protein
	Scaffold1	21427	21909	+	N/A	82.1106	64.8225	96.5133	79.8776	ABAKI_c00290	Acetyltransferase, GNAT family
	Scaffold1	21965	22837	-	C4	47.3484	48.3787	162.334	191.901	ABAKI_c00300	Uncharacterized isomerase
	Scaffold1	23001	23555	-	C4	36.4122	93.9332	554.311	1073.74	ABAKI_c00310	GPR1/FUN34/yaaH family protein
	Scaffold1	23964	24671	+	C4	9.93896	6.32007	221.349	147.91	ABAKI_c00320	Multidrug export protein MepA
	Scaffold1	24612	26147	-	N/A	1406.7	1385.2	1045.71	873.507	ABAKI_c00330	Choline/carnitine/betaine transport
	Scaffold1	26357	27892	-	C11	120.651	112.433	18.2174	201.84	ABAKI_c00340	OpuD3
	Scaffold1	28247	29662	+	C5	28.5115	30.8173	5.07493	264.834	ABAKI_c00350	Trimethylamine methyltransferase
	Scaffold1	29907	31277	+	N/A	17.3592	35.3337	20.6128	21.1386	ABAKI_c00360	PAS modulated sigma54 specific transcriptional regulator, Fis family
	Scaffold1	31676	32665	+	N/A	74.3822	60.4176	60.1136	28.8808	ABAKI_c00370	Methyl-accepting chemotaxis sensory transducer
	Scaffold1	32670	34724	+	C14	91.0451	96.2968	37.9007	26.2196	ABAKI_c00380	Methyl-accepting chemotaxis sensory transducer
	Scaffold1	34920	36260	-	C9	4961.15	6429.78	3898.81	12172.5	ABAKI_c00390	Endoglucanase
	Scaffold1	36525	37307	+	C4	1357.01	1019.66	3957.05	1957.29	ABAKI_c00400	(Fe-S)-binding protein
	Scaffold1	37401	39638	+	N/A	5399.23	3655.93	9755.42	6368.52	ABAKI_c00410	UvrABC system protein A
	Scaffold1	39850	40485	+	N/A	4552.19	3135.44	4079.73	3031.8	ABAKI_c00420	Uncharacterized protein
	Scaffold1	40624	41025	+	N/A	903.061	733.499	1194.83	815.027	ABAKI_c00430	Bacteriocin-protection protein
	Scaffold1	41279	42211	+	N/A	5672.65	4328.86	6458.02	5533.88	ABAKI_c00440	Uncharacterized protein
	Scaffold1	42322	42729	+	N/A	1.86599	4.33459	0	0.458619	ABAKI_c00450	Uncharacterized protein
	Scaffold1	42726	43118	+	C4	22.5252	47.7775	423.168	182.143	ABAKI_c00460	Maf-like protein Awo_c20600
	Scaffold1	43367	43783	-	C4	99.7779	133.657	923.102	1241.72	ABAKI_c00470	Uncharacterized protein
	Scaffold1	44224	44589	+	C4	86.1022	65.2274	1392.25	731.606	ABAKI_c00480	Uncharacterized protein
	Scaffold1	44937	45452	+	C4	55.1617	47.4841	677.234	334.191	ABAKI_c00490	Methylase involved in ubiquinone/menaquinone biosynthesis
	Scaffold1	45800	46069	-	C4	68.5317	68.905	693.216	777.709	ABAKI_c00500	Transcriptional regulator (Fragment)
	Scaffold1	46367	46678	+	C4	270.721	233.896	1552.82	2992.97	ABAKI_c00510	Uncharacterized protein
	Scaffold1	46720	47907	+	C4	1560.51	1311.65	9037.67	21137.3	ABAKI_c00520	Anaerobic nitric oxide reductase flavorubredoxin
	Scaffold1	48126	50477	-	C4	194.95	105.063	1896.79	1205.18	ABAKI_c00530	DEAD_2 domain protein
	Scaffold1	50572	51699	-	C12	100.816	28.524	186.527	190.489	ABAKI_c00540	Probable sulfate permease (SulP)
	Scaffold1	51976	52395	+	C4	109.63	58.3206	803.859	1011.41	ABAKI_c00550	Transcriptional regulatory protein WalR
	Scaffold1	52385	52675	+	C4	41.3161	30.5094	277.202	319.348	ABAKI_c00560	Response regulator
	Scaffold1	52678	54081	+	C4	235.531	185.294	1442.55	1516.78	ABAKI_c00570	Sensor histidine kinase
	Scaffold1	54195	54806	+	C4	104.767	89.487	674.481	832.497	ABAKI_c00580	Heavy metal translocating P-type ATPase
	Scaffold1	54886	55461	+	C4	1536.65	1622.59	5036.02	6768.27	ABAKI_c00590	Flavoredoxin
	Scaffold1	55649	55960	+	C4	24.3476	33.6973	1291.66	673.284	ABAKI_c00600	TetR family transcriptional regulator
	Scaffold1	55951	56418	-	C4	0	2.16729	37.4855	296.665	ABAKI_c00610	Endoglucanase
	Scaffold1	56683	57465	+	C4	1343.59	1032.16	3848.12	1884.03	ABAKI_c00620	(Fe-S)-binding protein
	Scaffold1	57559	59796	+	N/A	5403.08	3747.01	9827.51	6306.94	ABAKI_c00630	UvrABC system protein A
	Scaffold1	60008	60643	+	N/A	4564.55	3090.33	4132.1	3073.14	ABAKI_c00640	Uncharacterized protein
	Scaffold1	60782	61183	+	N/A	962.731	798.755	1190.43	824.097	ABAKI_c00650	Bacteriocin-protection protein
	Scaffold1	61437	62369	+	N/A	5697.76	4229.59	6440.72	5459.12	ABAKI_c00660	Uncharacterized protein
	Scaffold1	62480	63763	+	C10	8775.86	8349.9	14386.5	6538.41	ABAKI_c00670	Uncharacterized protein
	Scaffold1	63883	65025	-	C11	216.127	126.903	75.5044	270.765	ABAKI_c00680	Ornithine cyclodeaminase Ocd
	Scaffold1	65134	65991	-	C11	54.2057	23.113	18.4186	68.7322	ABAKI_c00690	Putative HTH-type transcriptional regulator, AraC family
	Scaffold1	66266	67393	-	C11	93.7869	53.3145	22.0787	114.069	ABAKI_c00700	Glycine/D-amino acid oxidase
	Scaffold1	67386	67715	-	N/A	6.42297	4.57217	1.43082	6.75252	ABAKI_c00710	Sarcosine oxidase subunit beta family protein
	Scaffold1	68103	68990	+	C10	54461.5	70942.3	135891	53407.2	ABAKI_c00720	Fructose-1,6-bisphosphate aldolase Fba5
	Scaffold1	69138	69404	+	N/A	1288.36	956.348	2522.14	1357.56	ABAKI_c00730	Uncharacterized protein
	Scaffold1	69451	69939	+	N/A	3792.36	3412.15	6349.68	4493.53	ABAKI_c00740	Ribosomal-protein-alanine acetyltransferase
	Scaffold1	70116	70451	-	C8	1413.88	874.286	2804.19	155.308	ABAKI_c00750	Glutaredoxin
	Scaffold1	70574	70810	+	N/A	1089.88	797.354	1945.81	1157.56	ABAKI_c00760	Uncharacterized protein
	Scaffold1	70887	71666	+	N/A	5439.51	5492.67	9744	9145.23	ABAKI_c00770	Acetyltransferase
	Scaffold1	71869	73497	+	N/A	19219.5	15128.5	14838.4	10030.2	ABAKI_c00780	ABC transporter
	Scaffold1	73661	74224	+	C9	8415.82	6276.6	7669.42	17487.5	ABAKI_c00790	TetR family transcriptional regulator
	Scaffold1	74453	76267	+	C5	10508.3	4219.74	3428.7	54669.4	ABAKI_c00800	ATP-dependent zinc metalloprotease FtsH
	Scaffold1	76364	77608	-	N/A	5046.82	6916.58	4404.19	5270.75	ABAKI_c00810	Drug resistance transporter, Bcr/CflA subfamily
	Scaffold1	77826	78371	-	N/A	1076.78	936.003	1043.75	968.151	ABAKI_c00820	Phosphopantothenoylcysteine synthase/decarboxylase CoaBC2
	Scaffold1	78977	79792	+	N/A	12147.9	9847.42	12552.4	16689.7	ABAKI_c00830	Glycerophosphoryl diester phosphodiesterase
	Scaffold1	79985	80677	+	N/A	5026.42	4850.9	4214.77	2546.89	ABAKI_c00840	HAD hydrolase, subfamily IA
	Scaffold1	80716	81264	+	N/A	3403.24	3976.15	3145.07	2886.44	ABAKI_c00850	Membrane protein
	Scaffold1	81279	82106	-	C3	445.23	226.121	128.876	181.087	ABAKI_c00860	Uncharacterized protein
	Scaffold1	82358	82909	+	C6	721.864	195.445	101.275	274.53	ABAKI_c00870	Uncharacterized protein
	Scaffold1	83011	83382	-	N/A	2425.57	1724.6	1625.92	1784.84	ABAKI_c00880	Uncharacterized protein
	Scaffold1	83801	84499	+	C8	10825.4	8541.51	8330.67	2597.36	ABAKI_c00890	Thymidylate synthase ThyA
	Scaffold1	84551	84961	+	N/A	7644.39	6129.58	6647.16	4983.12	ABAKI_c00900	Molybdopterin converting factor, subunit 2
	Scaffold1	85135	86328	-	N/A	2724.48	1975.1	3229.51	2645.26	ABAKI_c00910	DNA polymerase IV
	Scaffold1	86714	87790	+	N/A	62944.9	78332.7	57347	53512.1	ABAKI_c00920	Ribosome small subunit-dependent GTPase A
	Scaffold1	88148	89437	+	C4	7304.91	7207.41	14741.9	16067.4	ABAKI_c00930	Uncharacterized protein
	Scaffold1	89795	91357	-	C6	88758.9	17880.8	16256.3	29803.2	ABAKI_c00940	Sodium/proline symporter
	Scaffold1	91825	93285	+	C4	1011.6	1060.03	6705.25	6768.19	ABAKI_c00950	Uncharacterized protein
	Scaffold1	93317	96265	+	C4	1644.83	1834.83	12911.5	7854.51	ABAKI_c00960	Uncharacterized protein
	Scaffold1	96439	97428	+	C4	680.941	853.384	5994.99	4301.63	ABAKI_c00970	Bifunctional glutamate-cysteine ligase/glutathione synthetase GshAB
	Scaffold1	97603	98250	-	C9	217.602	145.989	454.17	1014.45	ABAKI_c00980	Uncharacterized protein
	Scaffold1	98843	99784	+	C4	9.54829	8.48736	221.349	212.876	ABAKI_c00990	ABC transport system ATP-binding protein
	Scaffold1	99794	100534	+	C4	2.21298	4.51641	175.01	253.868	ABAKI_c01000	Transport permease protein
	Scaffold1	100528	101520	+	C4	3.86299	7.57828	234.079	311.008	ABAKI_c01010	ABC transport system permease protein
	Scaffold1	101579	104179	+	C4	332.956	525.482	7313.3	3178.45	ABAKI_c01020	Transcriptional regulator LuxR family
	Scaffold1	104216	104836	+	C4	83.285	97.0508	752.627	300.659	ABAKI_c01030	Maf-like protein Awo_c20600
	Scaffold1	105084	105500	-	C4	87.2353	135.168	898.937	1172.11	ABAKI_c01040	Uncharacterized protein
	Scaffold1	105940	106536	+	C4	91.2706	83.95	664.785	397.173	ABAKI_c01050	Uncharacterized protein
	Scaffold1	106654	107286	+	C4	77.078	63.9692	668.675	261.157	ABAKI_c01060	Methylase involved in ubiquinone/menaquinone biosynthesis
	Scaffold1	107515	107781	-	C4	63.0164	40.1992	236.552	214.952	ABAKI_c01070	Transcriptional regulator, AraC family
	Scaffold1	108075	108389	+	C4	276.797	236.664	1591.99	2917.44	ABAKI_c01080	Uncharacterized protein
	Scaffold1	108430	109617	+	C4	1549.01	1351.29	8959.44	21126.4	ABAKI_c01090	Anaerobic nitric oxide reductase flavorubredoxin
	Scaffold1	109836	112187	-	C4	192.131	109.383	1902.9	1185	ABAKI_c01100	DEAD_2 domain protein
	Scaffold1	112282	113409	-	C12	101.904	27.6851	196.875	196.559	ABAKI_c01110	Probable sulfate permease (SulP)
	Scaffold1	113686	114384	+	C4	87.6696	43.3314	348.404	405.459	ABAKI_c01120	Response regulator
	Scaffold1	114387	115790	+	C4	224.508	197.99	1462.29	1449.6	ABAKI_c01130	Sensor histidine kinase
	Scaffold1	115904	116515	+	C4	94.0052	78.5948	675.663	831.526	ABAKI_c01140	Heavy metal translocating P-type ATPase
	Scaffold1	116595	117170	+	C4	1508.83	1609.97	5047.55	6726.14	ABAKI_c01150	Flavoredoxin
	Scaffold1	117358	117921	+	C4	19.7469	42.1847	133.539	122.583	ABAKI_c01160	Transcriptional regulator TetR family
	Scaffold1	118069	119232	+	C4	30.6395	51.2733	90.0777	73.5113	ABAKI_c01170	Aldo/keto reductase
	Scaffold1	119278	120192	-	N/A	138.663	126.903	139.642	197.7	ABAKI_c01180	2-dehydropantoate 2-reductase
	Scaffold1	120374	120754	+	N/A	143.911	129.63	123.207	80.6197	ABAKI_c01190	Uncharacterized protein
	Scaffold1	120887	121369	+	N/A	82.2416	67.3389	90.2758	82.2128	ABAKI_c01200	Acetyltransferase, GNAT family
	Scaffold1	121425	122297	-	C4	45.1791	64.5146	152.948	208.851	ABAKI_c01210	Uncharacterized isomerase
	Scaffold1	122461	123015	-	C4	39.4065	96.3938	582.046	1075.87	ABAKI_c01220	GPR1/FUN34/yaaH family protein
	Scaffold1	123424	125151	+	C4	1471.89	1883.14	3603.36	3218.67	ABAKI_c01230	Uncharacterized protein
	Scaffold1	125166	126797	+	N/A	1753.6	3359.06	2802.77	2631.36	ABAKI_c01240	Phosphoprotein phosphatase
	Scaffold1	126794	127348	+	C7	316.683	671.389	760.078	706.1	ABAKI_c01250	Uncharacterized protein
	Scaffold1	127345	127962	+	N/A	585.455	1028.89	734.4	654.481	ABAKI_c01260	Uncharacterized protein
	Scaffold1	127943	128353	+	N/A	331.701	538.096	351.506	394.724	ABAKI_c01270	Uncharacterized protein
	Scaffold1	128443	128928	+	N/A	236.177	416.184	373.386	402.007	ABAKI_c01280	Putative acetyltransferase
	Scaffold1	128981	129475	-	C14	212.004	283.169	129.243	102.621	ABAKI_c01290	Flavodoxin
	Scaffold1	129499	129885	-	N/A	132.975	193.18	152.833	103.538	ABAKI_c01300	Uncharacterized protein
	Scaffold1	129898	130362	-	N/A	91.7049	101.344	76.6319	108.897	ABAKI_c01310	MarR family transcriptional regulator
	Scaffold1	130664	132658	+	N/A	2852.16	2612.53	1923.61	1802.35	ABAKI_c01320	Uncharacterized protein
	Scaffold1	132829	134727	+	C3	18378.6	17810.1	8738.87	13383.4	ABAKI_c01330	Chaperone protein HtpG
	Scaffold1	134926	135432	+	C10	5995.81	4062.09	10538.5	5024.4	ABAKI_c01340	Uncharacterized protein
	Scaffold1	135571	136344	+	N/A	574.347	503.014	728.373	417.142	ABAKI_c01350	Uncharacterized protein
	Scaffold1	136429	136641	-	N/A	4865.23	7651.15	6537.84	11275	ABAKI_c01360	Hydroxylamine reductase
	Scaffold1	136881	137798	-	N/A	471.8	323.873	697.202	562.209	ABAKI_c01370	Uncharacterized protein
	Scaffold1	137979	139220	+	N/A	1042.76	861.733	1111.02	1046.07	ABAKI_c01380	Aminopeptidase
	Scaffold1	139399	139647	-	C4	1153.37	692.895	3341.46	3153.33	ABAKI_c01390	Uncharacterized protein
	Scaffold1	139763	140416	+	N/A	301.717	282.093	281.747	172.789	ABAKI_c01400	Uncharacterized protein
	Scaffold1	140492	141484	-	C7	520.493	1078.36	542.341	781.935	ABAKI_c01410	K+-dependent Na+/Ca+ exchanger-like-protein
	Scaffold1	141518	142219	-	N/A	300.545	516.018	206.198	305.801	ABAKI_c01420	Uncharacterized protein
	Scaffold1	142540	143748	+	N/A	2718.92	1428.88	1915.23	1262.85	ABAKI_c01430	Diguanylate phosphodiesterase
	Scaffold1	143912	144745	+	C9	1359.96	1427.17	1112.73	2983.33	ABAKI_c01440	Phosphate transport system phosphate-binding protein PstS
	Scaffold1	145014	146288	+	N/A	2299.28	1665.27	2140.8	1407.91	ABAKI_c01450	Uncharacterized protein
	Scaffold1	146496	146921	+	N/A	21.7415	23.0427	12.261	11.2482	ABAKI_c01460	Uncharacterized protein
	Scaffold1	147043	149451	+	N/A	13.1929	17.4499	7.32018	6.25769	ABAKI_c01470	Diguanylate cyclase/phosphodiesterase with PAS/PAC sensor(S)
	Scaffold1	149635	150036	-	N/A	3954.36	3604.29	3253.59	3930.03	ABAKI_c01480	Hemerythrin family protein
	Scaffold1	150150	150719	-	N/A	57.1151	63.1862	55.2047	67.1571	ABAKI_c01490	Putative manganese efflux pump MntP
	Scaffold1	150830	150928	-	N/A	766.531	836.955	993.103	667.106	ABAKI_c01500	Uncharacterized protein
	Scaffold1	150952	151134	-	N/A	210.485	260.91	393.983	361.981	ABAKI_c01510	Uncharacterized protein
	Scaffold1	151361	151942	+	C4	230.018	214.167	390.677	444.918	ABAKI_c01520	Flavin reductase
	Scaffold1	152108	153133	-	N/A	1318.04	1405.69	1014.51	1118.63	ABAKI_c01530	Branched-chain-amino-acid aminotransferase
	Scaffold1	153226	154122	-	N/A	1236.23	1145.25	992.561	1500.16	ABAKI_c01540	Uncharacterized protein
	Scaffold1	154312	155556	+	N/A	1089.81	1865.52	1306.36	2425.97	ABAKI_c01550	Major facilitator superfamily MFS_1 transporter
	Scaffold1	155716	156420	+	N/A	372.969	363.504	332.164	224.239	ABAKI_c01560	Putative ABC transport system ATP-binding protein
	Scaffold1	156410	157123	+	N/A	872.281	840.182	920.678	528.658	ABAKI_c01570	Uncharacterized protein
	Scaffold1	157193	157624	+	C10	211.533	250.046	328.546	133.439	ABAKI_c01580	Membrane protein
	Scaffold1	157661	158476	+	C8	478.738	634.909	675.459	275.936	ABAKI_c01590	Demethylmenaquinone methyltransferase
	Scaffold1	158638	160215	-	C4	40.6221	59.7049	204.214	495.783	ABAKI_c01600	Na+/H+ antiporter NhaC-like protein
	Scaffold1	160580	162427	+	N/A	877.844	876.16	1154.97	821.267	ABAKI_c01610	Fe-S oxidoreductase
	Scaffold1	162420	163103	+	C8	1059.2	1166.85	944.804	494.708	ABAKI_c01620	Uncharacterized protein
	Scaffold1	164217	165638	+	C3	5107	4935.94	795.171	1269.03	ABAKI_c01630	Cation:amino acid symporter AgcS
	Scaffold1	165671	166147	+	C3	2683.87	2623.92	421.906	694.308	ABAKI_c01640	Nucleoside diphosphate kinase Ndk
	Scaffold1	166266	167687	+	C7	588.328	1633.68	2191.81	1720.35	ABAKI_c01650	Cation:amino acid symporter AgcS
	Scaffold1	167890	168609	-	N/A	318.382	287.463	412.264	279.406	ABAKI_c01660	Sortase B
	Scaffold1	168994	169437	+	C3	615.156	365.808	227.168	241.594	ABAKI_c01670	Metal-binding-like protein
	Scaffold1	169480	170355	+	C3	2494.78	1535.6	935.599	763.081	ABAKI_c01680	Methionine aminopeptidase
	Scaffold1	170480	170797	+	C4	934.94	1296.46	2376.71	1892.48	ABAKI_c01690	50S ribosomal protein L21
	Scaffold1	170806	171138	+	N/A	3089.21	5092.21	4869.16	3781.59	ABAKI_c01700	Uncharacterized protein
	Scaffold1	171151	171438	+	N/A	9055.88	17512.9	16209.3	11829.6	ABAKI_c01710	50S ribosomal protein L27
	Scaffold1	171554	172837	+	N/A	2243.56	2348.76	2487.25	3014.82	ABAKI_c01720	GTPase Obg
	Scaffold1	172887	173240	+	N/A	520.406	687.275	638.216	602.5	ABAKI_c01730	Uncharacterized protein
	Scaffold1	173266	173898	+	N/A	1674.66	1974.11	1601.35	1323.39	ABAKI_c01740	Probable nicotinate-nucleotide adenylyltransferase
	Scaffold1	173895	174476	+	N/A	1452.08	1646.56	1885.06	1845.57	ABAKI_c01750	Nicotinate-nucleotide adenylyltransferase
	Scaffold1	174485	174829	+	C8	2148.06	2450.02	1970.04	1083.33	ABAKI_c01760	Ribosomal silencing factor RsfS
	Scaffold1	174879	175550	+	N/A	1687.81	2227.93	2407.51	1761.95	ABAKI_c01770	ABC transport system ATP-binding protein
	Scaffold1	175576	176427	+	N/A	1659.21	2226.37	1889.23	1584.08	ABAKI_c01780	Uncharacterized protein
	Scaffold1	176440	177735	+	N/A	2037.27	2670.12	2721.7	2802.31	ABAKI_c01790	Putative ABC transport system permease protein
	Scaffold1	177752	178375	+	C14	1389.26	1969.69	803.97	967.276	ABAKI_c01800	Uncharacterized protein
	Scaffold1	178403	179500	+	N/A	3398.33	5031.73	4020.61	3825.81	ABAKI_c01810	Ribosome-binding ATPase YchF
	Scaffold1	179726	181438	+	N/A	888.526	1281.58	955.931	959.401	ABAKI_c01820	Magnesium-protoporphyrin IX monomethyl ester oxidative cyclase
	Scaffold1	181938	183854	+	C7	2316.91	5909.3	4397.42	5494.68	ABAKI_c01830	Threonine--tRNA ligase
	Scaffold1	184397	185395	+	C11	2008.13	2213.24	1602	3498.19	ABAKI_c01840	ABC transport system substrate-binding protein
	Scaffold1	185439	186335	+	C9	1438.53	1396.99	1226.34	2497.87	ABAKI_c01850	ABC transport system permease protein
	Scaffold1	186337	187131	+	N/A	2854.88	2825.27	1512.51	2386.68	ABAKI_c01860	ABC transport system ATP-binding protein
	Scaffold1	187394	187864	+	C10	2104.53	2727.93	3714	1487.87	ABAKI_c01870	Translation initiation factor IF-3
	Scaffold1	187980	188174	+	N/A	1716.61	2719.61	2138.24	600.7	ABAKI_c01880	50S ribosomal protein L35
	Scaffold1	188201	188554	+	N/A	4431.8	8732.89	9630.62	2787.82	ABAKI_c01890	50S ribosomal protein L20
	Scaffold1	188687	190063	+	N/A	3814.09	5171.56	5206.16	4002.25	ABAKI_c01900	Potassium uptake protein TrkH2
	Scaffold1	190078	190746	+	N/A	2395.8	3032.25	3626.5	2579.26	ABAKI_c01910	Potassium uptake protein TrkA3
	Scaffold1	190712	191554	+	N/A	3634.92	4734.22	4789.23	3057.72	ABAKI_c01920	Methyltransferase
	Scaffold1	191817	192839	+	C14	737.493	1520.59	587.045	730.599	ABAKI_c01930	Phenylalanine--tRNA ligase alpha subunit
	Scaffold1	192853	195231	+	C14	1544.48	3377.42	1579.89	1982.63	ABAKI_c01940	Phenylalanine--tRNA ligase beta subunit
	Scaffold1	195241	196155	+	C14	688.536	1432.12	717.629	731.324	ABAKI_c01950	DNA recombination-mediator protein A
	Scaffold1	196214	196774	+	N/A	2970.93	2824.04	5624.51	2438.81	ABAKI_c01960	Cell division protein ZapA
	Scaffold1	196876	197520	-	C14	3378.26	7247.78	4445.82	2953.64	ABAKI_c01970	LexA repressor
	Scaffold1	197646	198611	-	N/A	196.814	171.856	195.163	285.549	ABAKI_c01980	Tyrosine recombinase XerD
	Scaffold1	199167	200651	-	C8	191.083	203.442	298.038	30.1358	ABAKI_c01990	Uncharacterized protein
	Scaffold1	200664	201692	-	C8	212.351	198.562	209.254	27.5289	ABAKI_c02000	Uncharacterized protein
	Scaffold1	201699	203606	-	C8	279.361	254.24	456.042	63.0174	ABAKI_c02010	Uncharacterized protein
	Scaffold1	203593	204264	-	C8	131.281	121.296	147.71	21.3437	ABAKI_c02020	Uncharacterized protein
	Scaffold1	204351	205016	-	N/A	104.029	105.664	136.397	97.8362	ABAKI_c02030	Transposase
	Scaffold1	205156	206013	-	N/A	151.424	98.183	157.633	136.197	ABAKI_c02040	Transposase
	Scaffold1	206231	207793	+	C11	57.0277	126.959	53.3747	146.19	ABAKI_c02050	Integrase
	Scaffold1	207790	208578	+	C11	17.4029	38.7592	18.6677	70.2407	ABAKI_c02060	ATPase AAA
	Scaffold1	208571	208894	+	N/A	4.16631	12.0389	13.3596	27.3782	ABAKI_c02070	Uncharacterized protein
	Scaffold1	209240	210811	+	N/A	816.859	581.623	830.393	519.618	ABAKI_c02080	Transposase
	Scaffold1	210804	211541	+	C3	817.126	624.409	444.301	282.103	ABAKI_c02090	ATP-binding protein
	Scaffold1	211672	212517	+	N/A	171.862	130.821	187.358	110.84	ABAKI_c02100	Transposase
	Scaffold1	212646	213311	+	N/A	107.676	88.1028	135.532	85.8216	ABAKI_c02110	Transposase
	Scaffold1	213870	214427	-	C10	875.355	1282.53	3308.13	307.513	ABAKI_c02120	Uncharacterized protein
	Scaffold1	214433	215149	-	C10	1165.77	1409.63	3036.88	268.253	ABAKI_c02130	Uncharacterized protein
	Scaffold1	215146	215889	-	C10	852.495	885.193	4032.85	690.836	ABAKI_c02140	Uncharacterized protein
	Scaffold1	216363	217523	+	C10	149.417	111.034	505.172	91.8738	ABAKI_c02150	Protein kinase
	Scaffold1	217565	219301	+	C10	576.681	529.664	1534.74	215.199	ABAKI_c02160	Uncharacterized protein
	Scaffold1	219875	221197	-	N/A	2460.26	3395.34	4728.52	3510.34	ABAKI_c02170	GTPase Der
	Scaffold1	221200	222579	-	C4	1626.97	1764.49	3298.67	2599.01	ABAKI_c02180	Peptide-binding protein
	Scaffold1	222675	223373	-	N/A	130.546	94.5344	183.464	161.819	ABAKI_c02190	4Fe-4S ferredoxin
	Scaffold1	223459	223998	+	C8	1312.92	1233.31	1645.98	728.186	ABAKI_c02200	Uncharacterized protein
	Scaffold1	224135	226801	-	N/A	486.597	580.561	542.009	525.876	ABAKI_c02210	Calcium-translocating P-type ATPase
	Scaffold1	226952	229600	-	N/A	8011.97	10919.2	7492.17	6196.12	ABAKI_c02220	Valine--tRNA ligase
	Scaffold1	229604	230752	-	N/A	2438.21	3428.43	2881.1	2214.44	ABAKI_c02230	UDP-N-acetylglucosamine-N-acetylmuramyl-(Pentapeptide)pyrophosphoryl-undecaprenol N-acetylglucosamine transferase MurG2
	Scaffold1	230767	230922	-	N/A	415.11	489.576	473.879	288.137	ABAKI_c02240	Stress-responsive transcriptional regulator PspC
	Scaffold1	230959	231768	-	N/A	4165.92	4751.39	3314.16	2440.26	ABAKI_c02250	Glutamate 5-kinase
	Scaffold1	231845	234790	-	N/A	3481.77	6791.42	5581.78	6236.16	ABAKI_c02260	Vitamin B12-dependent ribonucleotide reductase large subunit NrdJ
	Scaffold1	235101	235706	-	N/A	1680.82	2709.96	2649.27	3285.68	ABAKI_c02270	Glycerol-3-phosphate acyltransferase
	Scaffold1	235726	236016	-	N/A	294.551	460.02	570.258	763.778	ABAKI_c02280	Predicted metal-binding protein
	Scaffold1	236006	236578	-	N/A	1986.13	2828.68	2156.4	2393.39	ABAKI_c02290	Indolepyruvate oxidoreductase, subunit beta
	Scaffold1	236579	238390	-	N/A	3718.43	5796.46	6151.03	8315.79	ABAKI_c02300	Indolepyruvate oxidoreductase subunit IorA
	Scaffold1	238387	239304	-	N/A	989.415	1022.32	1953.76	1671.13	ABAKI_c02310	Phosphate butyryltransferase
	Scaffold1	239544	240908	-	C11	6290.3	7314.9	4355.84	10867.1	ABAKI_c02320	Citrate synthase
	Scaffold1	241406	242839	-	N/A	1435.19	2783.42	2562.5	2038.48	ABAKI_c02330	Adenylosuccinate lyase
	Scaffold1	242869	244065	-	C14	1202.86	2385.16	1830.38	1137.4	ABAKI_c02340	Aspartate aminotransferase
	Scaffold1	244083	244865	-	N/A	871.89	1224.71	1314.68	752.655	ABAKI_c02350	Uncharacterized protein
	Scaffold1	244915	246459	-	N/A	16602.6	27390.5	27390.8	15769.7	ABAKI_c02360	Ribonuclease Y
	Scaffold1	246631	247728	-	N/A	5700.22	5837.79	5685.15	6358.15	ABAKI_c02370	Protein RecA
	Scaffold1	247785	249026	-	N/A	4811.95	4949.53	6787.32	5470.83	ABAKI_c02380	Putative competence-damage inducible protein
	Scaffold1	249078	249617	-	N/A	1863.39	1875.31	2705.64	2478.59	ABAKI_c02390	CDP-diacylglycerol-glycerol-3-phosphate 3-phosphatidyltransferase
	Scaffold1	249601	250944	-	N/A	3569.48	3780.72	4634.73	3593.3	ABAKI_c02400	Ribosomal protein S12 methylthiotransferase RimO
	Scaffold1	250952	253453	-	N/A	4707.16	5308.41	3511.63	3402.9	ABAKI_c02410	DNA translocase FtsK
	Scaffold1	253590	254039	-	N/A	996.882	1984.14	1724.55	2364.43	ABAKI_c02420	Deoxyuridine 5'-triphosphate nucleotidohydrolase
	Scaffold1	254045	256123	-	C7	3417.48	7006.01	8021.21	10044.2	ABAKI_c02430	Polyribonucleotide nucleotidyltransferase
	Scaffold1	256179	256445	-	C4	3115.65	5359.93	9457.21	6172.58	ABAKI_c02440	30S ribosomal protein S15
	Scaffold1	256568	257476	-	C8	1503.92	2379.4	2045.93	1104.61	ABAKI_c02450	Riboflavin biosynthesis protein
	Scaffold1	257485	258417	-	C14	2781.01	3890.96	2967.84	1882.63	ABAKI_c02460	tRNA pseudouridine synthase B
	Scaffold1	258389	259351	-	N/A	6380.63	7411.79	5643.48	4288.47	ABAKI_c02470	Putative hydrolase
	Scaffold1	259335	259718	-	N/A	2310.43	2685.85	2083.45	1501.84	ABAKI_c02480	Ribosome-binding factor A
	Scaffold1	259758	261950	-	N/A	17802.7	20235.1	15349	12188.7	ABAKI_c02490	Translation initiation factor IF-2
	Scaffold1	261986	262249	-	N/A	322.284	486.11	373.118	378.285	ABAKI_c02500	Uncharacterized protein
	Scaffold1	262318	263436	-	C8	1594.61	3511.97	1953.8	874.754	ABAKI_c02510	Transcription termination/antitermination protein NusA
	Scaffold1	263460	263951	-	C14	440.981	854.167	546.88	388.9	ABAKI_c02520	Ribosome maturation factor RimP
	Scaffold1	264268	264825	-	C14	2767.69	5501.46	3301.87	2465.68	ABAKI_c02530	Ribosome-recycling factor
	Scaffold1	264829	265539	-	C14	3899.12	3713.32	2165.71	1689.57	ABAKI_c02540	Uridylate kinase
	Scaffold1	265643	266287	-	N/A	5951.39	11440.7	11100.1	6746.4	ABAKI_c02550	Elongation factor Ts
	Scaffold1	266317	267141	-	N/A	5326.16	8308.77	7619.99	6735.82	ABAKI_c02560	30S ribosomal protein S2
	Scaffold1	267292	268698	-	C14	3433.81	5209.96	3054.76	1989.71	ABAKI_c02570	ATP-dependent protease ATPase subunit HslU
	Scaffold1	268715	269245	-	C14	1186.98	1864.11	774.476	492.68	ABAKI_c02580	ATP-dependent protease subunit HslV
	Scaffold1	269313	271376	-	N/A	2313.19	3404.5	2977.17	2794.9	ABAKI_c02590	DNA topoisomerase 1
	Scaffold1	271495	272595	-	N/A	960.603	699.101	749.475	562.565	ABAKI_c02600	Putative Smf protein
	Scaffold1	272730	273560	-	C11	2311.24	2446.27	1460.53	3651.41	ABAKI_c02610	Glutamine ABC transport system substrate binding protein GlnH2
	Scaffold1	273738	274601	-	C6	149.034	44.9532	19.5492	33.6721	ABAKI_c02620	Uncharacterized protein
	Scaffold1	274896	275825	-	C8	339.861	355.025	148.776	36.7616	ABAKI_c02630	Uncharacterized protein
	Scaffold1	275908	276258	-	C3	63.2784	51.8745	25.4226	26.0204	ABAKI_c02640	Uncharacterized protein
	Scaffold1	276260	277183	-	C3	243.689	208.211	105.382	83.2328	ABAKI_c02650	Type II secretion system F domain protein
	Scaffold1	277203	278144	-	C3	192.39	178.261	51.7427	50.4056	ABAKI_c02660	Type II secretion system F domain-containing protein
	Scaffold1	278168	279511	-	C3	334.394	321.65	39.3986	58.2804	ABAKI_c02670	Type II secretion system protein E
	Scaffold1	279546	280688	-	C3	247.208	264.699	32.3276	49.8202	ABAKI_c02680	Response regulator receiver protein
	Scaffold1	280759	281418	-	C3	198.857	249.768	34.5249	47.5452	ABAKI_c02690	Flp pilus assembly protein CpaB
	Scaffold1	281513	282673	-	C3	286.609	311.429	50.3469	69.788	ABAKI_c02700	Uncharacterized protein
	Scaffold1	282677	283072	-	C3	118.612	96.4641	8.10265	13.9274	ABAKI_c02710	TadE family protein
	Scaffold1	283260	283415	-	C3	59.2844	50.3084	13.81	26.3704	ABAKI_c02720	Flp/Fap pilin component
	Scaffold1	283471	284157	-	C3	586.329	201.82	21.9126	41.7823	ABAKI_c02730	Peptidase A24 family
	Scaffold1	285268	287574	+	N/A	745.993	1281.86	1419.14	1157.8	ABAKI_c02740	Methyl-accepting chemotaxis transducer protein
	Scaffold1	287700	288125	-	C6	2423.19	790.646	835.426	1310.93	ABAKI_c02750	Glyoxalase
	Scaffold1	288295	290061	-	C10	511.68	558.83	1172.31	636.371	ABAKI_c02760	Diguanylate cyclase/phosphodiesterase with PAS/PAC sensor(S)
	Scaffold1	290610	292103	+	C14	63.6206	245.92	51.6213	65.5219	ABAKI_c02770	Uncharacterized protein
	Scaffold1	292069	292839	+	N/A	19.0092	15.4086	21.7274	9.09994	ABAKI_c02780	Replicative DNA helicase
	Scaffold1	292836	293189	+	N/A	35.0655	51.0357	17.502	19.98	ABAKI_c02790	Uncharacterized protein
	Scaffold1	293509	294105	+	C7	273.979	1641.12	1533.49	773.887	ABAKI_c02800	Uncharacterized protein
	Scaffold1	294245	294475	+	C7	219.298	861.241	1983.09	1988.12	ABAKI_c02810	Uncharacterized protein
	Scaffold1	294584	295360	-	C6	206.234	83.6009	54.8055	73.8794	ABAKI_c02820	Glycoside hydrolase family 18
	Scaffold1	295402	296109	-	C6	90.4869	35.2077	26.17	53.8029	ABAKI_c02830	Uncharacterized protein
	Scaffold1	296334	296600	-	C10	543.142	809.143	1140.99	391.633	ABAKI_c02840	Uncharacterized protein
	Scaffold1	296691	297680	-	C8	2964.51	3338.63	2641.19	735.66	ABAKI_c02850	Diguanylate cyclase
	Scaffold1	297945	298643	-	C8	1528.01	1218.23	642.428	308.003	ABAKI_c02860	Nitrogen regulatory protein P-II
	Scaffold1	298633	300123	-	N/A	2115.47	1785.29	1830.24	1831.69	ABAKI_c02870	Membrane protein
	Scaffold1	301016	301570	+	C12	361.472	59.3412	224.048	131.255	ABAKI_c02880	DNA-binding protein
	Scaffold1	301587	302465	+	C12	365.124	121.269	256.254	203.016	ABAKI_c02890	Beta-lactamase
	Scaffold1	302776	304140	-	N/A	3726.7	4696.53	5212.02	4655.94	ABAKI_c02900	tRNA (Uracil-5-)-methyltransferase
	Scaffold1	304175	304594	-	N/A	466.634	588.474	777.379	521.88	ABAKI_c02910	Iron dependent transcription repressor
	Scaffold1	304539	306467	-	N/A	4107.09	5054.48	5396.99	4159.7	ABAKI_c02920	UPF0313 protein AKG39_14015
	Scaffold1	306502	307281	-	C4	549.094	717.7	1463.92	1561.35	ABAKI_c02930	Adenosylcobinamide-GDP ribazoletransferase
	Scaffold1	307366	307641	-	C12	1627.7	743.344	1346.83	1655.11	ABAKI_c02940	Phosphocarrier protein PtsH1
	Scaffold1	307808	308023	+	C14	9172.03	18866.4	11765.1	10403.3	ABAKI_c02950	Hydroxylamine reductase
	Scaffold1	308417	309415	+	N/A	1731.64	2439.86	2344	3785.56	ABAKI_c02960	Aspartate-semialdehyde dehydrogenase
	Scaffold1	309624	310502	+	N/A	2274.27	3148.74	2626.8	3748.51	ABAKI_c02970	4-hydroxy-tetrahydrodipicolinate synthase
	Scaffold1	310514	311269	+	N/A	2820.02	4206.65	1981.86	2922.94	ABAKI_c02980	4-hydroxy-tetrahydrodipicolinate reductase
	Scaffold1	311306	312514	+	N/A	2223.42	3283.7	2779.08	4295.91	ABAKI_c02990	Aspartokinase
	Scaffold1	312622	313077	-	N/A	231.103	229.198	191.305	222.531	ABAKI_c03000	Transcriptional regulator AsnC family
	Scaffold1	313442	314872	+	C4	88.7106	166.152	243.083	282.827	ABAKI_c03010	Aspartate ammonia-lyase AnsB
	Scaffold1	314984	315679	-	N/A	2564.26	2328.53	2619.92	1874.2	ABAKI_c03020	Phosphate-specific transport system accessory protein PhoU
	Scaffold1	315696	316454	-	N/A	1997.62	2104.8	1096.49	1246.98	ABAKI_c03030	Phosphate import ATP-binding protein PstB
	Scaffold1	316468	317673	-	N/A	1487.05	1408.73	986.419	1619.43	ABAKI_c03040	Phosphate transport system permease protein PstA
	Scaffold1	317676	318557	-	C11	1008.64	929.446	644.581	1406.74	ABAKI_c03050	Phosphate transport system permease protein PstC
	Scaffold1	318961	319503	-	N/A	622.828	603.66	1165.56	861.637	ABAKI_c03060	Inositol-1-monophosphatase/HD domain protein
	Scaffold1	319517	320089	-	N/A	384.999	476.252	690.15	478.095	ABAKI_c03070	A/G-specific adenine glycosylase
	Scaffold1	320123	321613	-	N/A	1280.15	1799.64	2196.73	1701.98	ABAKI_c03080	DEAD/DEAH box helicase domain protein
	Scaffold1	321737	323560	-	N/A	5214.06	5662.52	8204.11	5829.31	ABAKI_c03090	Glutamine--fructose-6-phosphate aminotransferase [isomerizing]
	Scaffold1	323855	325210	-	N/A	1945.32	2130.86	2430.13	2447.3	ABAKI_c03100	Phosphoglucosamine mutase
	Scaffold1	325437	326507	-	N/A	429.562	608.763	701.245	603.678	ABAKI_c03110	tRNA (5-methylaminomethyl-2-thiouridylate)-methyltransferase TrmU
	Scaffold1	326515	327285	-	N/A	1319.26	1743.4	1198.77	1065.92	ABAKI_c03120	Cobyric acid synthase-like protein CobQ
	Scaffold1	327285	328637	-	N/A	1556.56	1976.86	1183.96	1112.99	ABAKI_c03130	Uncharacterized protein
	Scaffold1	328658	329671	-	N/A	1167.4	1194.92	1055.59	1135.44	ABAKI_c03140	Ion transport channel
	Scaffold1	329693	329950	-	N/A	92.4013	72.1074	89.2633	88.9473	ABAKI_c03150	Uncharacterized protein
	Scaffold1	330055	330222	-	C7	11026.3	38417	53372.3	40409.5	ABAKI_c03160	Cytochrome C551
	Scaffold1	330454	331563	+	N/A	1819.23	2386.42	2549.94	3014.62	ABAKI_c03170	Putative uncharacterized protein
	Scaffold1	331730	333403	+	N/A	4806.94	4830.29	4576.4	3678.83	ABAKI_c03180	Glutamine--tRNA ligase
	Scaffold1	333457	334764	+	N/A	3886.02	5292.42	4144.94	4547.35	ABAKI_c03190	Phenylacetate-coenzyme A ligase
	Scaffold1	334775	335212	+	N/A	1549.14	2239.49	1205.47	1123.66	ABAKI_c03200	Amino acid-binding protein
	Scaffold1	335461	336075	-	C3	6127.61	4665.83	2536.94	2084.13	ABAKI_c03210	V-type ATP synthase subunit D
	Scaffold1	336084	337466	-	C3	12342	8597.84	5366.29	5000.89	ABAKI_c03220	V-type ATP synthase beta chain
	Scaffold1	337478	339265	-	N/A	7122.59	5503.98	4952.08	4754.85	ABAKI_c03230	V-type ATP synthase alpha chain
	Scaffold1	339266	339883	-	C3	4522.34	3303.78	1524.23	967.502	ABAKI_c03240	V-ATPase E-subunit VatE
	Scaffold1	339896	340198	-	N/A	753.68	539.313	470.874	364.659	ABAKI_c03250	Uncharacterized protein
	Scaffold1	340201	340641	-	N/A	1245.91	765.31	735.473	605.548	ABAKI_c03260	V-type sodium ATP synthase subunit K
	Scaffold1	340654	341754	-	N/A	4523.29	3405.45	2556.86	2200.28	ABAKI_c03270	V-type ATP synthase subunit I
	Scaffold1	341741	342625	-	C8	3487.35	2836.11	1784.21	865.075	ABAKI_c03280	V-type ATP synthase subunit I
	Scaffold1	342646	343692	-	C8	3328.17	2513.45	1781	482.704	ABAKI_c03290	V-ATPase C-subunit VatC
	Scaffold1	343738	344073	-	C8	1721.45	995.124	696.867	181.418	ABAKI_c03300	Uncharacterized protein
	Scaffold1	344323	346911	+	C9	4440.07	3824.11	5697.73	9446.12	ABAKI_c03310	Copper-translocating P-type ATPase ActP
	Scaffold1	346921	347187	+	C9	458.787	417.023	948.256	1615.56	ABAKI_c03320	Uncharacterized protein
	Scaffold1	354435	355178	-	C8	1900.36	1853.15	1305.28	576.467	ABAKI_c03330	Uncharacterized protein
	Scaffold1	355197	356354	-	N/A	2246.61	2131.96	1614.94	1083.93	ABAKI_c03340	Amidohydrolase
	Scaffold1	356450	357514	-	N/A	1019.15	692.924	727.926	603.382	ABAKI_c03350	FAD:protein FMN transferase
	Scaffold1	357686	358030	+	N/A	333.615	230.596	208.12	221.976	ABAKI_c03360	Conserved domain protein
	Scaffold1	358030	358557	+	N/A	470.104	329.213	363.559	343.739	ABAKI_c03370	Heptaprenyl diphosphate synthase component I
	Scaffold1	358547	360298	-	C8	1670.16	1519.91	1183.2	620.09	ABAKI_c03380	Phosphate regulon sensor protein PhoR2
	Scaffold1	360301	361005	-	N/A	482.95	412.785	407.496	324.778	ABAKI_c03390	Transcriptional regulator PhoB
	Scaffold1	361424	365662	-	N/A	12110	8554.88	7004.74	4959.59	ABAKI_c03400	2-hydroxyglutaryl-CoA dehydratase
	Scaffold1	365712	367232	-	C10	5950.53	3544.23	5909.48	2645.27	ABAKI_c03410	Sugar kinase, putative
	Scaffold1	367377	368204	-	C9	360.346	531.274	475.281	3142.25	ABAKI_c03420	Sigma-54 interacting regulator
	Scaffold1	368491	369705	-	C5	635.633	821.769	661.016	5505.39	ABAKI_c03430	Adenosylhomocysteinase
	Scaffold1	369899	371746	-	N/A	1039.81	595.815	828.259	569.499	ABAKI_c03440	Sigma-54 interacting regulator
	Scaffold1	372242	373360	-	N/A	908.574	1134.3	1209.27	1068.09	ABAKI_c03450	Structural toxin protein (Hemagglutinin/hemolysin) RtxA
	Scaffold1	373351	374046	-	N/A	1387.96	1604.15	1744.94	1508.34	ABAKI_c03460	Uncharacterized protein
	Scaffold1	374048	375190	-	N/A	2919.83	3067.95	3577.05	2839.22	ABAKI_c03470	RNA polymerase sigma factor SigA
	Scaffold1	375191	376972	-	C14	4610.05	4296.94	2849.87	1717.05	ABAKI_c03480	DNA primase
	Scaffold1	377199	377468	+	C9	11271.3	13082.9	13699.1	36901.9	ABAKI_c03490	Uncharacterized protein
	Scaffold1	377560	380181	-	N/A	14790.1	25573.1	19132.8	27672.7	ABAKI_c03500	Pyruvate phosphate dikinase PpdK1
	Scaffold1	380187	380990	-	N/A	2163.27	2842.25	3014.24	2802.38	ABAKI_c03510	Putative pyruvate, phosphate dikinase regulatory protein
	Scaffold1	381006	381644	-	N/A	3246.94	3773.47	3045.69	3312.59	ABAKI_c03520	Transcriptional regulator
	Scaffold1	381773	382342	-	C10	715.523	827.308	1079.58	464.716	ABAKI_c03530	ComEA-like protein
	Scaffold1	382346	383197	-	C10	892.413	1041.63	2041.39	813.475	ABAKI_c03540	Histidinol-phosphatase HisK
	Scaffold1	383305	384063	-	C7	1929.02	3445.53	4693.45	4052.83	ABAKI_c03550	Glutamine ABC transport system ATP-binding protein GlnQ3
	Scaffold1	384074	384736	-	C4	844.378	1287.83	2022.27	2054.7	ABAKI_c03560	Glutamine ABC transport system permease protein GlnP3
	Scaffold1	384853	385683	-	N/A	9314.07	13370.6	10557.3	16402.1	ABAKI_c03570	Glutamine ABC transport system substrate binding protein GlnH2
	Scaffold1	385854	387023	-	C8	5896.8	6823.16	4701.67	2662.93	ABAKI_c03580	Conjugal transfer protein TraB
	Scaffold1	387053	388039	-	C8	3781.23	5045.07	2860.1	1369.16	ABAKI_c03590	Lipoate--protein ligase
	Scaffold1	388060	389070	-	N/A	2895.27	3739	2910.28	2116.78	ABAKI_c03600	HTH-type transcriptional regulator RegA
	Scaffold1	389117	390376	-	N/A	5118.3	5236.25	3183.9	2712.31	ABAKI_c03610	Aromatic amino acid aminotransferase
	Scaffold1	390497	391054	-	N/A	1962.94	1981.32	1921.76	1367.24	ABAKI_c03620	Fumarate hydratase beta subunit FumB
	Scaffold1	391056	391901	-	N/A	2337.08	2006.66	2469.62	1863.47	ABAKI_c03630	Fumarate hydratase alpha subunit FumA
	Scaffold1	391911	393029	-	N/A	2915.12	2846.42	3449.5	1932.77	ABAKI_c03640	Putative membrane protein
	Scaffold1	393128	393592	-	C14	603.302	902.725	577.824	377.471	ABAKI_c03650	Putative tRNA (cytidine(34)-2'-O)-methyltransferase
	Scaffold1	393746	395041	-	N/A	9522.42	7404.78	7198.75	5891.5	ABAKI_c03660	Two component system histidine kinase
	Scaffold1	395060	395728	-	N/A	6502.8	5084.49	4647.18	3854.43	ABAKI_c03670	Transcriptional regulator
	Scaffold1	395879	396556	+	N/A	497.053	248.522	390.521	288.59	ABAKI_c03680	Uncharacterized transcriptional regulatory protein YkoG
	Scaffold1	396543	398027	+	N/A	1103.3	882.776	949.218	610.122	ABAKI_c03690	Two-component sensor histidine kinase
	Scaffold1	398222	399394	-	N/A	2501.68	2884.25	2145.38	2577.3	ABAKI_c03700	Acetylornithine aminotransferase
	Scaffold1	399406	400275	-	N/A	897.936	843.052	859.159	879.916	ABAKI_c03710	Acetylglutamate kinase
	Scaffold1	400367	401587	-	N/A	1381.91	1286.32	1023.29	1491.44	ABAKI_c03720	Arginine biosynthesis bifunctional protein ArgJ
	Scaffold1	401602	402645	-	N/A	1195.94	1149.2	992.995	1494.61	ABAKI_c03730	N-acetyl-gamma-glutamyl-phosphate reductase
	Scaffold1	402936	404153	+	C11	2373.17	2649.37	1058.31	3356.73	ABAKI_c03740	Argininosuccinate synthase
	Scaffold1	404160	405539	+	C11	2610.78	2598.47	1249.06	3035.3	ABAKI_c03750	Argininosuccinate lyase
	Scaffold1	405592	405939	-	N/A	329.231	340.343	215.594	318.822	ABAKI_c03760	Uncharacterized protein
	Scaffold1	405940	406416	-	N/A	285.136	328.585	179.392	359.398	ABAKI_c03770	Uncharacterized protein
	Scaffold1	406629	407291	+	C8	1982.56	2746.45	1945.32	962.58	ABAKI_c03780	Uncharacterized protein
	Scaffold1	407426	407968	-	N/A	952.532	1037.7	870.433	1457.54	ABAKI_c03790	Metal-binding protein
	Scaffold1	408095	409072	-	C7	241.607	440.094	617.996	519.485	ABAKI_c03800	Uroporphyrinogen decarboxylase
	Scaffold1	409270	409902	-	C7	16.2746	79.9791	61.6594	72.1716	ABAKI_c03810	Methionine synthase
	Scaffold1	410290	411447	+	C3	17.0559	34.6064	3.02772	10.8439	ABAKI_c03820	Uncharacterized protein
	Scaffold1	411458	411637	+	N/A	0.390666	1.98548	0	0.458619	ABAKI_c03830	Uncharacterized protein
	Scaffold1	412024	413196	+	C7	9.85162	44.8975	14.6914	26.5515	ABAKI_c03840	Uncharacterized protein
	Scaffold1	413228	413422	-	C4	58.5928	50.4902	148.428	234.076	ABAKI_c03850	Uncharacterized protein
	Scaffold1	413464	414321	-	N/A	263.484	231.995	282.264	251.05	ABAKI_c03860	Transporter
	Scaffold1	414435	415961	+	N/A	651.646	590.096	420.789	529.877	ABAKI_c03870	ComM competence protein M
	Scaffold1	416271	416948	-	C13	91.1809	633.932	66.0189	81.9896	ABAKI_c03880	SAM-dependent methyltransferase
	Scaffold1	417035	417556	-	C13	63.492	458.313	32.3435	58.6666	ABAKI_c03890	3-isopropylmalate dehydratase
	Scaffold1	417559	418857	-	C13	114.662	1013.32	78.612	185.77	ABAKI_c03900	3-isopropylmalate dehydratase large subunit
	Scaffold1	419007	420413	-	C13	162.923	1084.09	119.192	230.153	ABAKI_c03910	Uncharacterized protein
	Scaffold1	420429	421301	-	C13	99.1252	784.004	58.4464	105.343	ABAKI_c03920	Carboxyphosphoenolpyruvate mutase
	Scaffold1	421329	422801	-	C13	185.708	1444.88	130.054	210.39	ABAKI_c03930	Glutamate mutase
	Scaffold1	422770	423909	-	C13	169.477	1427.11	111.955	191.816	ABAKI_c03940	Uncharacterized protein
	Scaffold1	423950	425791	-	C13	167.698	1534.06	155.477	242.964	ABAKI_c03950	Cobalamin B12-binding domain protein
	Scaffold1	425926	426507	-	C13	61.2814	504.708	46.8689	76.2752	ABAKI_c03960	Peptide synthetase
	Scaffold1	426551	427711	-	C13	128.027	894.032	80.2121	176.223	ABAKI_c03970	Enamidase
	Scaffold1	427761	428777	-	C13	116.484	564.05	43.6911	86.057	ABAKI_c03980	Xanthine dehydrogenase, molybdenum binding subunit apoprotein
	Scaffold1	428859	430121	-	C13	88.6209	630.87	62.4067	128.443	ABAKI_c03990	Xanthine dehydrogenase, molybdenum binding subunit apoprotein
	Scaffold1	430114	430617	-	C13	38.1058	269.285	20.0315	39.3566	ABAKI_c04000	Purine hydroxylase delta subunit apoprotein
	Scaffold1	430610	431500	-	C13	92.7022	609.98	45.4381	80.2036	ABAKI_c04010	Molybdopterin dehydrogenase FAD-binding
	Scaffold1	431500	432405	-	C13	69.4393	389.144	20.9289	44.9746	ABAKI_c04020	3-hydroxyisobutyrate dehydrogenase
	Scaffold1	432503	435577	-	C13	225.333	2288.77	170.041	276.968	ABAKI_c04030	Putative methyl-accepting chemotaxis transducer protein
	Scaffold1	435710	436585	-	C13	36.1525	347.49	27.802	59.6141	ABAKI_c04040	Uncharacterized protein
	Scaffold1	436557	438065	-	C13	102.641	1010.2	63.3744	133.138	ABAKI_c04050	NADH dehydrogenase (Quinone)
	Scaffold1	438107	439081	-	C13	49.1294	654.877	49.5134	75.4725	ABAKI_c04060	Uncharacterized protein
	Scaffold1	439065	440423	-	C13	181.194	2786.76	109.276	237.829	ABAKI_c04070	Uncharacterized protein
	Scaffold1	440688	442220	-	C13	306.577	6256.53	258.055	684.968	ABAKI_c04080	Uncharacterized protein
	Scaffold1	442214	442444	-	C13	35.5435	807.534	45.2529	102.102	ABAKI_c04090	Uncharacterized protein
	Scaffold1	442488	443942	-	C13	300.889	6297.15	168.671	423.11	ABAKI_c04100	Uncharacterized protein
	Scaffold1	443967	444605	-	C13	149.165	2699.74	115.932	221.179	ABAKI_c04110	Methionine synthase
	Scaffold1	444677	445312	-	C13	32.2895	573.64	27.1696	65.4734	ABAKI_c04120	5-methyltetrahydrofolate--homocysteine S-methyltransferase
	Scaffold1	445644	446912	+	C8	1265.57	1425.39	648.608	317.09	ABAKI_c04130	Uncharacterized protein
	Scaffold1	446925	447560	+	C8	468.58	658.414	283.874	137.838	ABAKI_c04140	Uncharacterized protein
	Scaffold1	447588	449324	+	C14	1753.16	3016.77	889.794	869.53	ABAKI_c04150	Uncharacterized protein
	Scaffold1	449544	450356	-	C13	85.4979	549.788	94.4852	180.81	ABAKI_c04160	Putative synthase
	Scaffold1	450337	450933	-	C13	16.4493	182.133	37.9838	68.8649	ABAKI_c04170	Uncharacterized protein
	Scaffold1	450990	451202	+	N/A	1.12833	0	0.399225	0.899129	ABAKI_c04180	Uncharacterized protein
	Scaffold1	451420	452202	-	C4	10324	17338.6	35841	48096.6	ABAKI_c04190	Prolipoprotein diacylglyceryl transferase
	Scaffold1	452205	452774	-	C4	4443.71	7285.03	15731.5	23051.2	ABAKI_c04200	Phosphate propanoyltransferase
	Scaffold1	452839	454578	-	N/A	5317.64	4213.76	4635.63	3703.9	ABAKI_c04210	DNA repair protein RecN
	Scaffold1	454591	455040	-	N/A	1257.21	1046.19	1145.16	787.884	ABAKI_c04220	Arginine repressor
	Scaffold1	455067	455936	-	N/A	2577.62	2018.26	2316.6	2363.17	ABAKI_c04230	NAD kinase
	Scaffold1	455946	456803	-	N/A	1994.72	1469.1	1565.78	1762.44	ABAKI_c04240	Hemolysin A
	Scaffold1	456808	457380	-	C12	442.726	325.565	520.409	656.534	ABAKI_c04250	Uncharacterized protein
	Scaffold1	458085	458981	-	N/A	690.264	799.412	1363.29	1504.69	ABAKI_c04260	Geranyltranstransferase CrtE
	Scaffold1	458981	459196	-	N/A	399.405	579.33	447.773	439.252	ABAKI_c04270	Exodeoxyribonuclease 7 small subunit
	Scaffold1	459198	460406	-	N/A	1297.34	1706.1	1597.5	1942.83	ABAKI_c04280	Exodeoxyribonuclease 7 large subunit
	Scaffold1	460393	461376	-	N/A	1058.18	1293.72	1781.7	2029.72	ABAKI_c04290	O-sialoglycoprotein endopeptidase Gcp1
	Scaffold1	461363	461779	-	N/A	880.007	1071.24	1012.96	944.013	ABAKI_c04300	N utilization substance protein B homolog
	Scaffold1	462007	462351	-	N/A	2236.89	3183.6	4098.55	5481.36	ABAKI_c04310	Uncharacterized protein
	Scaffold1	462371	462811	-	C4	1513.54	2068.6	3026.74	4855.6	ABAKI_c04320	Transcriptional regulator
	Scaffold1	462814	463371	-	N/A	4589.72	5464.81	5384.16	7004.97	ABAKI_c04330	Elongation factor EF-P
	Scaffold1	463465	464328	-	C7	351.666	1078.63	1063.23	1296.18	ABAKI_c04340	Release factor glutamine methyltransferase
	Scaffold1	464527	464739	-	C4	2719.92	4715.74	10887.4	10638.5	ABAKI_c04350	50S ribosomal protein L31
	Scaffold1	464823	466508	-	C14	3023.85	6843.99	3226.2	3159.41	ABAKI_c04360	Transcription termination factor Rho
	Scaffold1	466704	468047	-	C4	268.044	502.791	804.216	874.774	ABAKI_c04370	Uncharacterized protein
	Scaffold1	468466	468870	-	N/A	6037.61	9905.24	11324.5	6155.35	ABAKI_c04380	Putative membrane protein
	Scaffold1	468889	470010	-	N/A	1148.7	1346.31	950.003	939.898	ABAKI_c04390	Queuine tRNA-ribosyltransferase
	Scaffold1	470045	471070	-	N/A	1224.13	1424.2	1672.24	1368.39	ABAKI_c04400	S-adenosylmethionine:tRNA ribosyltransferase-isomerase
	Scaffold1	471063	472127	-	N/A	557.817	622.647	792.824	631.328	ABAKI_c04410	Holliday junction ATP-dependent DNA helicase RuvB
	Scaffold1	472132	472734	-	N/A	366.167	302.103	379.078	424.431	ABAKI_c04420	Holliday junction ATP-dependent DNA helicase RuvA
	Scaffold1	473086	474447	-	C4	715.712	769.378	1558.73	1060.66	ABAKI_c04430	DNA repair protein radA
	Scaffold1	474656	475144	-	N/A	250.503	260.476	419.476	487.968	ABAKI_c04440	Uncharacterized protein
	Scaffold1	475410	476051	-	C12	372.367	237.532	412.871	530.692	ABAKI_c04450	Xaa-Pro dipeptidase
	Scaffold1	476055	476558	-	N/A	2.60365	2.95033	2.22927	1.33964	ABAKI_c04460	GTPase HflX
	Scaffold1	476823	477242	-	N/A	0.737661	0.783037	0.79845	0.44051	ABAKI_c04470	GTPase HflX
	Scaffold1	477340	477663	-	N/A	0.390666	3.55155	0	1.78015	ABAKI_c04480	GTPase HflX
	Scaffold1	477766	477864	-	N/A	0	0	0	0	ABAKI_c04490	GTPase HflX
	Scaffold1	478287	478613	-	N/A	1.51899	3.36973	4.60864	8.09216	ABAKI_c04500	Probable tRNA sulfurtransferase
	Scaffold1	478567	479016	-	N/A	1.51899	1.20244	0	1.37586	ABAKI_c04510	Probable tRNA sulfurtransferase
	Scaffold1	478970	479122	-	N/A	0	0	0.71541	0.899129	ABAKI_c04520	Probable tRNA sulfurtransferase
	Scaffold1	479164	479757	-	N/A	4.51331	4.15277	4.84179	2.7155	ABAKI_c04530	Cysteine desulfurase IscS2
	Scaffold1	479754	480305	-	N/A	2.95064	3.73337	5.49013	4.47754	ABAKI_c04540	Cysteine desulfurase IscS2
	Scaffold1	480350	480763	-	N/A	66.6999	59.1739	33.7073	36.6592	ABAKI_c04550	Deoxycytidine triphosphate deaminase
	Scaffold1	480738	480884	-	N/A	0	0	0.316185	3.1379	ABAKI_c04560	Deoxycytidine triphosphate deaminase
	Scaffold1	480997	481299	-	N/A	1.47532	1.38426	0.399225	0.44051	ABAKI_c04570	Endonuclease MutS2
	Scaffold1	481284	481622	-	N/A	0.737661	0.60122	0.79845	0.881021	ABAKI_c04580	Endonuclease MutS2
	Scaffold1	481633	484515	+	N/A	1.51899	1.20244	1.11464	0.458619	ABAKI_c04590	Transposase
	Scaffold1	484637	486292	-	N/A	12.4553	37.1931	6.67183	18.5861	ABAKI_c04600	Transcription termination factor Rho
	Scaffold1	486519	487403	-	N/A	22.7849	35.4597	7.23714	17.524	ABAKI_c04610	Uncharacterized protein
	Scaffold1	487471	487863	-	N/A	24.0879	25.7554	14.0751	33.2257	ABAKI_c04620	Uncharacterized protein
	Scaffold1	488282	488686	-	N/A	5976.65	10043.7	11424.3	6171.93	ABAKI_c04630	Putative membrane protein
	Scaffold1	488705	489826	-	N/A	1126.4	1360.57	935.401	939.24	ABAKI_c04640	Queuine tRNA-ribosyltransferase
	Scaffold1	489861	490844	-	N/A	23.4352	42.8562	12.8103	24.7532	ABAKI_c04650	S-adenosylmethionine:tRNA ribosyltransferase-isomerase
	Scaffold1	490880	491944	-	N/A	596.53	627.263	776.13	638.286	ABAKI_c04660	Holliday junction ATP-dependent DNA helicase RuvB
	Scaffold1	491949	492551	-	N/A	343.683	321.579	395.468	443.844	ABAKI_c04670	Holliday junction ATP-dependent DNA helicase RuvA
	Scaffold1	492902	494263	-	C4	717.319	820.598	1557.26	1127.62	ABAKI_c04680	DNA repair protein radA
	Scaffold1	494472	494960	-	N/A	263.783	278.667	381.489	491.462	ABAKI_c04690	Uncharacterized protein
	Scaffold1	495225	495866	-	C12	359.222	262.672	407.86	566.307	ABAKI_c04700	Xaa-Pro dipeptidase
	Scaffold1	495870	497675	-	C9	1879.42	1378.36	1968.25	2842.44	ABAKI_c04710	GTPase HflX
	Scaffold1	497771	498931	-	N/A	3184	1799.25	3377.29	3114.27	ABAKI_c04720	Probable tRNA sulfurtransferase
	Scaffold1	498951	500117	-	C12	3187.47	1731.49	3231.05	3516.73	ABAKI_c04730	Cysteine desulfurase IscS2
	Scaffold1	500162	500695	-	C12	1004.97	564.438	1300.1	1357.81	ABAKI_c04740	Deoxycytidine triphosphate deaminase
	Scaffold1	500720	503089	-	N/A	5770.27	3532.75	5475.98	3982.95	ABAKI_c04750	Endonuclease MutS2
	Scaffold1	503093	505561	-	N/A	3074.3	1908.56	3469.45	2367.57	ABAKI_c04760	Putative peptidase
	Scaffold1	505685	507082	-	N/A	342.943	290.064	310.676	282.447	ABAKI_c04770	Transcriptional regulator
	Scaffold1	507187	508035	+	C12	516.979	186.608	546.065	519.16	ABAKI_c04780	Pyridoxal kinase
	Scaffold1	508311	508991	-	C8	3743.68	4467.01	2633.14	1460.19	ABAKI_c04790	Regulatory protein RecX
	Scaffold1	508991	509548	-	C3	1854.07	766.961	873.445	426.543	ABAKI_c04800	Uncharacterized protein
	Scaffold1	509955	511355	-	C3	18429.4	16769.1	6710.46	6031.49	ABAKI_c04810	DNA translocase FtsK
	Scaffold1	511498	512820	+	C8	2104.11	2183.75	1661.11	1060.88	ABAKI_c04820	Uncharacterized protein
	Scaffold1	512821	514113	-	C9	104.726	49.3993	68.3983	284.366	ABAKI_c04830	Amidase domain-containing protein
	Scaffold1	514859	517222	-	C12	9824.6	6117.96	10822.4	15447.1	ABAKI_c04840	Cation-transporting ATPase
	Scaffold1	517385	517831	-	N/A	25121.4	31960.5	31630.5	18663.4	ABAKI_c04850	Uncharacterized protein
	Scaffold1	517843	518025	-	N/A	6246.64	4347.82	6765.26	3338.33	ABAKI_c04860	30S ribosomal protein S21
	Scaffold1	518132	518476	-	N/A	1775.22	1299.69	1291.39	1063.17	ABAKI_c04870	Putative HIT family protein
	Scaffold1	518569	519894	-	N/A	2586.78	1632.16	1870.92	1141.66	ABAKI_c04880	Putative oxidoreductase
	Scaffold1	519891	520640	-	N/A	1284.07	820.176	1231.22	923.75	ABAKI_c04890	Ribosomal RNA small subunit methyltransferase E
	Scaffold1	520642	521580	-	N/A	1850.79	1217.92	1816.35	1519.08	ABAKI_c04900	Ribosomal protein L11 methyltransferase
	Scaffold1	521846	522196	+	C12	132.674	45.3169	246.267	264.145	ABAKI_c04910	Ethanolamine utilization protein eutS
	Scaffold1	522199	522675	+	C12	577.991	285.659	680.077	611.209	ABAKI_c04920	Propanediol utilization protein PduV2
	Scaffold1	522687	523937	+	C12	781.583	449.462	1303.67	993.345	ABAKI_c04930	Methylthioribose kinase MtnK2
	Scaffold1	524282	524716	-	C12	999.718	516.844	722.966	1041.04	ABAKI_c04940	Transcriptional regulator, BadM/Rrf2 family
	Scaffold1	524716	525645	-	N/A	3495.09	2159.53	2035.29	1917.46	ABAKI_c04950	Cysteine synthase CysK3
	Scaffold1	525997	527190	-	N/A	6334.17	4526.44	6209.84	8023.43	ABAKI_c04960	Chaperone protein DnaJ
	Scaffold1	527356	529182	-	N/A	81505.3	59855.3	42998.7	69340.1	ABAKI_c04970	Chaperone protein DnaK
	Scaffold1	529226	529825	-	C3	17635.3	10602.1	7798.28	6654.02	ABAKI_c04980	Protein GrpE
	Scaffold1	529834	530868	-	C12	21350.6	9981.93	12822.1	14712.1	ABAKI_c04990	Heat-inducible transcription repressor HrcA
	Scaffold1	530996	532153	-	N/A	511.211	358.479	542.696	375.353	ABAKI_c05000	Oxygen-independent coproporphyrinogen-III oxidase 1
	Scaffold1	532253	533230	+	N/A	5665.02	6675.78	3248.68	3933.57	ABAKI_c05010	Putative tyrosine/serine phosphatase
	Scaffold1	533581	534876	+	N/A	5126.08	5230.65	3047.62	3504.25	ABAKI_c05020	Gamma-glutamyl phosphate reductase
	Scaffold1	535075	535542	+	N/A	2527.64	3327.28	2529.74	1730.93	ABAKI_c05030	Uncharacterized protein
	Scaffold1	535800	537206	-	C5	864.424	118.961	169.073	266.8	ABAKI_c05040	Uncharacterized protein
	Scaffold1	537203	538240	-	C6	296.633	43.6805	54.7033	93.6	ABAKI_c05050	NAD-dependent epimerase/dehydratase
	Scaffold1	538285	539601	-	C5	414.68	47.1205	46.2525	97.6551	ABAKI_c05060	UDP-glucose 6-dehydrogenase
	Scaffold1	539633	541120	-	C5	324.846	33.5858	32.8098	71.1036	ABAKI_c05070	Polysaccharide biosynthesis protein
	Scaffold1	541151	542047	-	C6	298.543	33.2222	28.4663	44.1357	ABAKI_c05080	Glycosyl transferase
	Scaffold1	542124	543020	-	C6	281.138	25.993	19.4821	38.5901	ABAKI_c05090	Glycosyl transferase
	Scaffold1	543033	544268	-	C5	217.905	19.9808	12.0949	42.2772	ABAKI_c05100	Uncharacterized protein
	Scaffold1	544306	545382	-	C5	273.94	15.4086	11.2805	39.616	ABAKI_c05110	Uncharacterized protein
	Scaffold1	545379	546512	-	C5	526.955	38.2695	28.3513	49.0659	ABAKI_c05120	Glycosyltransferase
	Scaffold1	546491	547396	-	C5	316.12	17.9953	15.739	32.8092	ABAKI_c05130	Uncharacterized protein
	Scaffold1	547439	548314	-	C5	352.268	15.2268	16.0392	32.6824	ABAKI_c05140	Uncharacterized protein
	Scaffold1	548367	549248	-	C5	520.228	21.0014	16.6045	32.9237	ABAKI_c05150	Uncharacterized protein
	Scaffold1	549277	550098	-	C5	507.116	18.4705	15.656	48.7219	ABAKI_c05160	Uncharacterized protein
	Scaffold1	550183	551079	-	C5	382.912	16.485	20.1145	49.1986	ABAKI_c05170	Uncharacterized protein
	Scaffold1	551128	551610	-	C5	149.774	4.57217	5.00787	15.6171	ABAKI_c05180	UDP-N-acetylglucosamine transferase subunit ALG13
	Scaffold1	551607	552074	-	C5	234.493	9.32617	5.49013	16.5705	ABAKI_c05190	Uncharacterized protein
	Scaffold1	552107	553264	-	C5	352.013	11.0741	13.4267	52.3184	ABAKI_c05200	Uncharacterized protein
	Scaffold1	553279	554166	-	C5	323.24	16.1917	13.6599	50.2969	ABAKI_c05210	Uncharacterized protein
	Scaffold1	554138	555007	-	C5	275.416	10.4728	9.61651	33.1772	ABAKI_c05220	Polysaccharide deacetylase
	Scaffold1	555085	555597	-	C5	144.911	3.0061	1.83004	4.00081	ABAKI_c05230	Uncharacterized protein
	Scaffold1	555999	556409	+	C9	41.2288	83.4046	26.4542	182.433	ABAKI_c05240	Holin
	Scaffold1	556418	556642	-	N/A	4.90397	0	0	2.67928	ABAKI_c05250	Uncharacterized protein
	Scaffold1	556896	558059	-	C9	269.33	283.128	336.798	800.557	ABAKI_c05260	Alcohol dehydrogenase
	Scaffold1	558652	560010	-	C4	740.099	664.204	1111.45	1474.68	ABAKI_c05270	Uncharacterized protein
	Scaffold1	560003	560500	-	N/A	289.303	216.684	342.458	365.3	ABAKI_c05280	Uncharacterized protein
	Scaffold1	560928	561464	+	C3	410.041	781.291	125.542	226.346	ABAKI_c05290	Uncharacterized protein
	Scaffold1	561607	562476	-	C12	839.87	215.733	1152.11	389.426	ABAKI_c05300	L-serine dehydratase, alpha chain
	Scaffold1	562469	563155	-	C12	1206.78	263.021	1241.4	441.666	ABAKI_c05310	L-serine dehydratase, iron-sulfur-dependent, beta subunit
	Scaffold1	563271	565196	-	C12	2475.95	633.078	3716.49	1356.7	ABAKI_c05320	Copper/silver-translocating P-type ATPase,heavy metal-translocating P-type ATPase, Cd/Co/Hg/Pb/Zn-transporting
	Scaffold1	565211	565486	-	C12	286.524	41.1641	357.066	173.182	ABAKI_c05330	Nickel-resistant pritein NirB
	Scaffold1	565676	566068	+	C5	48.3481	2.95033	1.91309	8.14649	ABAKI_c05340	Uncharacterized protein
	Scaffold1	566104	567312	+	C5	200.42	12.6401	5.62426	35.8203	ABAKI_c05350	Uncharacterized protein
	Scaffold1	567347	569383	+	C5	341.9	26.1191	13.0275	79.6603	ABAKI_c05360	Glycosyltransferase
	Scaffold1	569387	570691	+	C5	149.725	13.4232	7.32018	31.379	ABAKI_c05370	Glycosyl transferase
	Scaffold1	570705	574793	-	N/A	3622.98	3903.04	3853.6	4872.38	ABAKI_c05380	Pyruvate phosphate dikinase Ppdk2
	Scaffold1	574924	575349	-	N/A	378.486	621.066	431.954	614.648	ABAKI_c05390	Ferric uptake regulation protein Fur2
	Scaffold1	575346	576206	-	C9	272.072	329.899	470.599	947.471	ABAKI_c05400	Zinc ABC transport system permease protein ZnuC
	Scaffold1	576208	576975	-	C9	445.545	695.062	698.834	1417.63	ABAKI_c05410	Zinc ABC transport system ATP-binding protein ZnuB
	Scaffold1	576972	577856	-	C9	676.466	1126.52	1637.24	4378.29	ABAKI_c05420	Zinc ABC transport system zinc-binding protein ZnuA
	Scaffold1	578077	579072	-	C9	1565.95	1735.98	2225.36	4676.6	ABAKI_c05430	UDP-glucose 4-epimerase
	Scaffold1	579321	582059	+	C5	145.952	25.336	22.3789	77.0295	ABAKI_c05440	Putative cation-transporting ATPase
	Scaffold1	582248	584068	-	C4	499.179	785.192	1021.52	1584.15	ABAKI_c05450	Choline/carnitine/betaine transporter
	Scaffold1	584199	585497	-	C4	344.069	457.796	605.454	1020.69	ABAKI_c05460	Uncharacterized protein
	Scaffold1	585738	587141	-	N/A	1678.27	2513.86	1068.53	1423.75	ABAKI_c05470	Uncharacterized protein
	Scaffold1	587531	587923	+	C5	203.676	73.8966	66.1019	566.553	ABAKI_c05480	Uncharacterized protein
	Scaffold1	588170	589204	-	C10	1022.13	757.422	1772.01	788.161	ABAKI_c05490	Uncharacterized protein
	Scaffold1	589673	589933	-	N/A	172.338	162.07	217.053	144.204	ABAKI_c05500	Plasmid stabilization system protein
	Scaffold1	589935	590147	-	N/A	42.0538	36.4659	101.422	59.7346	ABAKI_c05510	Uncharacterized protein
	Scaffold1	590374	590637	+	C12	427.269	341.434	501.729	783.834	ABAKI_c05520	Antitoxin
	Scaffold1	590759	591589	-	N/A	1571.24	1617.48	1624.04	2413.52	ABAKI_c05530	DNA recombination mediator protein A
	Scaffold1	591680	591898	-	N/A	468.192	341.519	291.91	417.201	ABAKI_c05540	Uncharacterized protein
	Scaffold1	592326	592598	+	C3	130.243	68.0517	35.9557	26.7928	ABAKI_c05550	Addiction module antitoxin, RelB/DinJ family
	Scaffold1	593001	593390	+	C3	488.376	562.426	225.98	294.715	ABAKI_c05560	Uncharacterized protein
	Scaffold1	593393	593686	+	N/A	211.88	304.003	129.444	240.713	ABAKI_c05570	Addiction module toxin, RelE/StbE family
	Scaffold1	593867	594139	-	N/A	822.321	570.072	584.295	515.139	ABAKI_c05580	Uncharacterized protein
	Scaffold1	594139	594468	-	N/A	368.104	257.54	427.828	395.99	ABAKI_c05590	Antitoxin
	Scaffold1	594562	595404	-	C8	1464.08	572.52	885.058	167.147	ABAKI_c05600	Transposase IS200-like domain-containing protein
	Scaffold1	595709	596446	-	C3	822.807	632.477	439.127	300.074	ABAKI_c05610	ATP-binding protein
	Scaffold1	596439	598010	-	N/A	827.451	564.719	782.562	527.964	ABAKI_c05620	Transposase
	Scaffold1	598223	598804	+	N/A	30.9865	21.8403	17.0868	36.4419	ABAKI_c05630	Outer membrane protein, related to OmpA/MotB
	Scaffold1	599175	600119	-	N/A	2126.19	2037.38	2007.01	1083.84	ABAKI_c05640	Transposase
	Scaffold1	600831	600971	-	C10	102.204	127.337	175.112	68.1165	ABAKI_c05650	Uncharacterized protein
	Scaffold1	601137	602054	-	C8	1283.2	1669.82	1277.22	162.73	ABAKI_c05660	Uncharacterized protein
	Scaffold1	602214	603578	-	C8	4590.36	6629.63	5862.79	1296.5	ABAKI_c05670	Lipopolysaccharide biosynthesis protein RfbH
	Scaffold1	603579	604613	-	C8	9286.87	10981.2	5772.35	1340.45	ABAKI_c05680	CDP-glucose 4,6-dehydratase RfbG
	Scaffold1	604653	605426	-	C8	2854.55	3837.45	2776.76	352.795	ABAKI_c05690	Glucose-1-phosphate cytidylyltransferase
	Scaffold1	605457	606386	-	C8	1731.52	2726.58	2020.44	199.479	ABAKI_c05700	Uncharacterized protein
	Scaffold1	606461	608014	-	C8	1826.85	2667.64	1970.22	234.292	ABAKI_c05710	Uncharacterized protein
	Scaffold1	608192	609373	-	C8	2544.44	2920.28	2157.32	179.011	ABAKI_c05720	Uncharacterized protein
	Scaffold1	609934	611058	-	C8	3987.15	5095.5	2686.52	442.877	ABAKI_c05730	UDP-N-acetylglucosamine 2-epimerase
	Scaffold1	611064	612173	-	C8	6022.29	7787.77	3651.61	1143.51	ABAKI_c05740	NAD-dependent epimerase/dehydratase
	Scaffold1	612175	613191	-	C8	3801.83	5277.63	3018.12	948.798	ABAKI_c05750	Polysaccharide biosynthesis protein CapD
	Scaffold1	613507	614613	-	C8	1255.98	1637.4	1499.33	87.9332	ABAKI_c05760	Putative glycosyl transferase
	Scaffold1	614833	615972	-	C8	1285.38	1454.45	1066.62	136.064	ABAKI_c05770	Uncharacterized protein
	Scaffold1	616042	616944	-	C8	3346.49	4135.41	3056.41	246.517	ABAKI_c05780	Glycosyl transferase, family 2
	Scaffold1	617115	618077	-	C8	1501.81	2023.22	2339.73	97.4374	ABAKI_c05790	Uncharacterized glycosyltransferase RF_0543
	Scaffold1	618118	619008	-	C8	1295.05	1736.88	2421.68	126.215	ABAKI_c05800	Glycosyl transferase family 2
	Scaffold1	619628	620776	-	C8	2922.9	3266.12	3708.32	451.542	ABAKI_c05810	Glycosyl transferase group 1
	Scaffold1	620782	621657	-	C8	6256.94	5878.28	4864.69	2541.87	ABAKI_c05820	Putative NAD-dependent epimerase/dehydratase
	Scaffold1	621654	622319	-	C8	4637.96	3901.68	4923.64	2379.11	ABAKI_c05830	Sugar transferase
	Scaffold1	622615	622839	+	C3	5947.8	7083.31	900.122	2828.96	ABAKI_c05840	Uncharacterized protein
	Scaffold1	622875	623102	+	C11	10334.4	12083.2	1755.89	6469.59	ABAKI_c05850	Uncharacterized protein
	Scaffold1	623322	623900	+	C11	2194.26	1616.29	341.988	1211.05	ABAKI_c05860	Putative RNA polymerase sigma factor 70
	Scaffold1	623897	624415	-	N/A	833.532	973.477	836.346	636.861	ABAKI_c05870	Metallophosphoesterase
	Scaffold1	624403	625194	-	C8	1623.55	1756.45	1152.63	578.768	ABAKI_c05880	Putative capsular polysaccharide biosynthesis protein
	Scaffold1	625366	627240	-	N/A	5409.92	5072.67	4554.05	3938.71	ABAKI_c05890	Putative capsular polysaccharide biosynthesis protein YveM
	Scaffold1	627423	628427	-	N/A	2292.94	1162.42	1631.91	1589.93	ABAKI_c05900	Putative sporulation transcription regulator WhiA
	Scaffold1	628785	629795	-	N/A	3567.27	2691	3715.35	3274.5	ABAKI_c05910	Putative gluconeogenesis factor
	Scaffold1	629834	630706	-	N/A	2275.38	1669.53	2331.2	2535.48	ABAKI_c05920	Nucleotide-binding protein Awo_c26910
	Scaffold1	630790	631521	-	N/A	1850.8	1281.35	1801.61	2242.42	ABAKI_c05930	Putative PHP domain-containing protein
	Scaffold1	631544	632449	-	N/A	1589.82	1106.94	1402.92	1897.18	ABAKI_c05940	UDP-N-acetylenolpyruvoylglucosamine reductase
	Scaffold1	632618	633376	-	N/A	2184.88	1378.11	2001.84	1089.41	ABAKI_c05950	Amidophosphoribosyltransferase
	Scaffold1	633577	635790	-	N/A	4564.18	3804.86	5138.53	3681.21	ABAKI_c05960	ATP-dependent RecD-like DNA helicase
	Scaffold1	635874	637625	-	C7	3309.49	45926.2	45994.3	157367	ABAKI_c05970	Iron hydrogenase HydA1
	Scaffold1	637646	639445	-	C7	4394.25	45093.6	39643.9	148986	ABAKI_c05980	Iron hydrogenase HydB
	Scaffold1	639465	639863	-	C7	583.679	4143.32	5259.58	18073.5	ABAKI_c05990	Iron hydrogenase HydD
	Scaffold1	639865	640413	-	C7	2293.83	15134.1	22079.4	49471.5	ABAKI_c06000	sensory transduction histidine kinase HydE
	Scaffold1	640421	640891	-	C7	1587.12	7423.01	16476.9	44070.8	ABAKI_c06010	iron hydrogenase HydC
	Scaffold1	641167	641883	-	N/A	3423	3386.29	5409.71	5158.1	ABAKI_c06020	PHP domain-containing protein
	Scaffold1	641886	642218	-	N/A	964.638	782.801	1389.65	1433.92	ABAKI_c06030	AraC family transcriptional regulator
	Scaffold1	642267	643601	-	N/A	3251.51	2897.7	4868.59	4827.52	ABAKI_c06040	Hydrogenase large subunit domain protein
	Scaffold1	643779	644195	-	C4	1006.09	1159.53	2321.76	1945.69	ABAKI_c06050	Putative anti-sigma regulatory factor, serine/threonine protein kinase
	Scaffold1	644192	644542	-	C4	1103.17	1075.06	2536.99	2003	ABAKI_c06060	DRTGG domain-containing protein
	Scaffold1	644651	646960	-	C3	8548.64	6960.43	4185.03	4693.75	ABAKI_c06070	Uncharacterized protein
	Scaffold1	646957	648075	-	N/A	2931.78	2387.57	1777.51	2322.29	ABAKI_c06080	Uncharacterized protein
	Scaffold1	648690	649838	-	C9	775.902	963.341	2497.94	5197.71	ABAKI_c06090	Alcohol dehydrogenase, iron-type
	Scaffold1	650208	651359	+	N/A	2068.46	2123.99	2565.03	2290.26	ABAKI_c06100	1-deoxy-D-xylulose 5-phosphate reductoisomerase
	Scaffold1	651552	654533	-	C11	142.091	104.84	36.4539	86.5156	ABAKI_c06110	Methyl-accepting chemotaxis sensory transducer
	Scaffold1	654676	656067	-	C3	67.702	57.5376	15.9562	37.9626	ABAKI_c06120	Amino acid permease
	Scaffold1	656268	656549	-	C3	332.613	293.014	94.9195	73.27	ABAKI_c06130	Uncharacterized protein
	Scaffold1	656613	657662	-	C3	602.608	450.57	226.277	279.762	ABAKI_c06140	Uncharacterized protein
	Scaffold1	657739	658425	-	N/A	26.3009	24.3712	13.7429	15.2852	ABAKI_c06150	Uncharacterized protein
	Scaffold1	658576	659214	-	N/A	25.3885	12.6959	8.50188	8.97318	ABAKI_c06160	Phosphate propanoyltransferase
	Scaffold1	659231	659995	-	N/A	30.1615	28.524	13.992	14.3861	ABAKI_c06170	Ethanolamine utilization cobalamin adenosyltransferase
	Scaffold1	660064	660357	-	N/A	7.29164	2.16729	5.22504	2.66117	ABAKI_c06180	Carboxysome structural protein EutM
	Scaffold1	660379	661887	-	N/A	43.2695	28.7058	19.3831	24.6808	ABAKI_c06190	Acetaldehyde dehydrogenase
	Scaffold1	661891	662478	-	N/A	23.0009	11.2559	7.63636	13.3602	ABAKI_c06200	CcmK protein
	Scaffold1	662482	663138	-	N/A	20.2249	14.6814	10.0157	21.6334	ABAKI_c06210	Ethanolamine carboxysome structural protein
	Scaffold1	663160	664062	-	N/A	15.9276	13.1153	9.38337	18.8817	ABAKI_c06220	Ethanolamine ammonia-lyase light chain
	Scaffold1	664082	665449	-	N/A	27.6015	19.016	11.2805	25.248	ABAKI_c06230	Ethanolamine ammonia-lyase heavy chain EutB
	Scaffold1	665684	667123	-	N/A	9.11396	5.53703	1.58092	15.3033	ABAKI_c06240	Ethanolamine utilization protein EutA
	Scaffold1	667447	668925	-	C8	11180.1	9753.08	4832	2173.93	ABAKI_c06250	Ethanolamine two-component sensor kinase
	Scaffold1	668922	669503	-	C8	6567.18	6137.21	2071.96	826.281	ABAKI_c06260	Ethanolamine utilization response regulator
	Scaffold1	669512	669946	-	C8	4204.25	3518.3	2636.98	1350.38	ABAKI_c06270	Ethanolamine utilization protein EutP
	Scaffold1	669957	670301	-	C3	5943.7	4626.45	2520.86	1562.11	ABAKI_c06280	Putative PduU protein
	Scaffold1	670420	670704	-	N/A	15.0589	11.4377	15.1577	7.13871	ABAKI_c06290	Microcompartments protein
	Scaffold1	670870	671376	-	N/A	8.28895	10.7104	10.482	22.4963	ABAKI_c06300	Ethanolamine utilization EutQ family protein
	Scaffold1	671433	671981	-	N/A	9.07029	8.36131	6.10653	17.5783	ABAKI_c06310	Microcompartments protein
	Scaffold1	671978	673315	-	C12	34.7621	13.0595	21.0631	39.5255	ABAKI_c06320	Electron transport complex subunit C
	Scaffold1	673308	673595	-	N/A	1.172	1.38426	1.91309	2.25688	ABAKI_c06330	Ethanolamine utilization protein EutN/carboxysome structural protein Ccml
	Scaffold1	673592	673906	-	N/A	0	0.60122	0.71541	1.79826	ABAKI_c06340	Uncharacterized protein
	Scaffold1	674303	674458	-	C7	276.976	729.123	999.057	748.148	ABAKI_c06350	Uncharacterized protein
	Scaffold1	674797	675996	-	N/A	31.4645	54.9364	37.4185	61.708	ABAKI_c06360	Transporter
	Scaffold1	676375	677748	+	C7	48.3894	109.453	85.9194	125.238	ABAKI_c06370	Uroporphyrinogen decarboxylase
	Scaffold1	677788	678450	-	N/A	338.037	285.45	530.422	301.624	ABAKI_c06380	Uncharacterized protein
	Scaffold1	678520	679416	-	N/A	322.111	330.682	313.924	149.02	ABAKI_c06390	Uncharacterized protein
	Scaffold1	679770	680675	-	C6	330.704	76.4275	37.9007	38.9944	ABAKI_c06400	Uncharacterized protein
	Scaffold1	680921	685171	-	N/A	10912.8	9190.81	7259.4	5853.56	ABAKI_c06410	DNA polymerase III PolC-type
	Scaffold1	685182	686249	-	N/A	5207.64	3917.37	5005.94	4279.4	ABAKI_c06420	4-hydroxy-3-methylbut-2-en-1-yl diphosphate synthase (flavodoxin)
	Scaffold1	686258	687052	-	N/A	2422.46	1946.9	2434.49	2867.54	ABAKI_c06430	Putative metalloprotease
	Scaffold1	687061	687864	-	N/A	2569.87	2026.21	2710.4	2790.42	ABAKI_c06440	Phosphatidate cytidylyltransferase
	Scaffold1	687885	688592	-	N/A	2595.05	1633.43	2116.97	2214.51	ABAKI_c06450	Isoprenyl transferase
	Scaffold1	688976	689626	-	N/A	608.548	634.392	714.496	625.058	ABAKI_c06460	Uncharacterized protein
	Scaffold1	689662	690045	-	N/A	319.425	323.216	412.316	309.91	ABAKI_c06470	Uncharacterized protein
	Scaffold1	690386	691216	-	N/A	2153.35	1996.81	3773.77	2884.11	ABAKI_c06480	Putative hydrolase
	Scaffold1	691450	692127	-	C12	390.299	68.3595	998.472	726.37	ABAKI_c06490	Putative ABC transport system ATP-binding protein
	Scaffold1	692112	692912	-	C12	424.267	70.0517	1153.88	861.879	ABAKI_c06500	Putative ABC transport system permease protein
	Scaffold1	692884	693870	-	C4	1708.82	439.76	5801.35	6029.39	ABAKI_c06510	Putative ABC transport system substrate binding protein
	Scaffold1	694570	697992	-	N/A	6019.65	4572.04	6688.16	6268.53	ABAKI_c06520	Putative permease
	Scaffold1	698576	702190	-	N/A	3469.08	2982.89	2458.8	2568.36	ABAKI_c06530	ATP-dependent helicase/nuclease subunit A
	Scaffold1	702174	705530	-	N/A	2340.02	2165.09	2005.73	2114.61	ABAKI_c06540	ATP-dependent helicase/deoxyribonuclease subunit B
	Scaffold1	705882	707435	+	C7	276.976	729.123	999.057	748.148	ABAKI_c06550	Uncharacterized protein
	Scaffold1	707538	708542	-	N/A	3004.47	3740.77	5079.46	3521.68	ABAKI_c06560	Tryptophan--tRNA ligase
	Scaffold1	708566	709375	-	N/A	1669.06	1593.09	2197.46	1837.77	ABAKI_c06570	Glutamate racemase
	Scaffold1	709396	709974	-	N/A	1317.36	806.22	1124.96	811.28	ABAKI_c06580	Xanthine phosphoribosyltransferase
	Scaffold1	710172	712250	-	N/A	25317.1	32196.5	18395.5	30048.8	ABAKI_c06590	Translation elongation factor G
	Scaffold1	712391	713143	-	C14	3997.94	2895.35	2430.48	1250.61	ABAKI_c06600	RNA polymerase sigma factor
	Scaffold1	713133	713294	-	C10	349.407	186.497	392.517	90.6066	ABAKI_c06610	Uncharacterized protein
	Scaffold1	713815	714234	-	C7	2141.2	3446.25	4396.37	2869.13	ABAKI_c06620	Putative anti-sigma F factor
	Scaffold1	714576	715058	-	N/A	1699.04	2694.65	1703.18	1756.83	ABAKI_c06630	Putative anti-sigma F factor
	Scaffold1	715519	716280	-	C8	1464.75	1597.33	961.609	499.836	ABAKI_c06640	RNA polymerase sigma factor
	Scaffold1	716581	716991	-	N/A	1110.82	1349.2	2065.76	1539.83	ABAKI_c06650	Putative anti-sigma F factor
	Scaffold1	717263	718015	-	C14	5023.9	4723.69	3448.14	1789.18	ABAKI_c06660	RNA polymerase sigma factor
	Scaffold1	718005	718166	-	C14	1754.03	1577.79	927.644	398.651	ABAKI_c06670	Uncharacterized protein
	Scaffold1	718266	718628	-	N/A	3512.49	3860.75	5950.02	6399.96	ABAKI_c06680	Uncharacterized protein
	Scaffold1	718625	719014	-	C14	10627.5	11824.9	8566.19	5399.99	ABAKI_c06690	Uncharacterized protein
	Scaffold1	719139	719402	-	C14	996.613	1195.8	782.579	429.553	ABAKI_c06700	Putative phosphocarrier protein
	Scaffold1	719430	721163	-	N/A	12993.4	14208.2	10354.4	8930.57	ABAKI_c06710	Phosphoenolpyruvate-protein phosphotransferase
	Scaffold1	721368	721967	-	N/A	3130.87	3695.17	3457.17	3073.78	ABAKI_c06720	Recombination protein RecR
	Scaffold1	721973	722317	-	N/A	1842.98	1933.09	1914.13	1621.5	ABAKI_c06730	Nucleoid-associated protein Amet_4780
	Scaffold1	722405	724123	-	C8	4031.99	4060.65	2861.94	1902.47	ABAKI_c06740	DNA polymerase III gamma/tau subunit DnaX1
	Scaffold1	724414	725553	-	N/A	441.94	161.803	524.309	263.854	ABAKI_c06750	Uncharacterized protein
	Scaffold1	725694	726242	-	C9	1707.12	851.314	4342.84	6804.48	ABAKI_c06760	Propanediol utilization protein
	Scaffold1	726297	727253	-	C4	1065.66	609.49	3855.87	7461.79	ABAKI_c06770	Uncharacterized protein
	Scaffold1	727278	728603	-	C9	1970.16	853.466	4806.13	8160.49	ABAKI_c06780	Electron transport complex subunit C
	Scaffold1	728618	730027	-	C12	2915.78	938.355	3809.99	6554.12	ABAKI_c06790	CoA-dependent proprionaldehyde dehydrogenase PduP
	Scaffold1	730069	730476	-	C12	568.662	136.734	644.571	1140.94	ABAKI_c06800	ATP:cob(I)alamin adenosyltransferase
	Scaffold1	730502	731515	-	C12	1805.46	470.674	1753.06	2980.44	ABAKI_c06810	ATP:cob(I)alamin adenosyltransferase
	Scaffold1	731528	731806	-	C12	794.863	183.057	465.521	521.644	ABAKI_c06820	Ethanolamine utilization protein EutN/carboxysome structural protein Ccml, putative
	Scaffold1	731823	732635	-	C12	1084.06	330.445	1751.71	2190.97	ABAKI_c06830	Uncharacterized protein
	Scaffold1	732687	733511	-	C12	1486.55	408.914	1981.83	2494.35	ABAKI_c06840	Ethanolamine utilization protein EutJ
	Scaffold1	733516	734169	-	C12	1157.46	321.761	1147.74	1634.76	ABAKI_c06850	Phosphate propanoyltransferase
	Scaffold1	734226	734612	-	C12	410.08	107.189	776.073	685.865	ABAKI_c06860	Microcompartments protein
	Scaffold1	734625	734999	-	C12	520.879	149.723	784.463	1209.25	ABAKI_c06870	Glycerol dehydratase
	Scaffold1	735001	736818	-	C9	4220.42	1494.29	9340.83	18603.4	ABAKI_c06880	Diol dehydratase-reactivating factor large subunit
	Scaffold1	736857	737357	-	C9	1927.76	919.925	4264.29	9352.25	ABAKI_c06890	Propanediol dehydratase, small subunit PduE
	Scaffold1	737374	738024	-	C9	2611.1	1138.34	5083.68	11270.6	ABAKI_c06900	Uncharacterized protein
	Scaffold1	738043	739704	-	C5	5065.03	2183.4	12711.9	33687.7	ABAKI_c06910	Glycerol dehydratase large subunit
	Scaffold1	739750	740535	-	C5	3796.29	1507.47	7072.17	19165.8	ABAKI_c06920	Propanediol utilization protein
	Scaffold1	740562	740837	-	C5	1434.62	443.813	3666.74	8340.85	ABAKI_c06930	Predicted microcompartment shellprotein
	Scaffold1	741128	742246	-	C8	12215.8	13547.9	13387.6	5729.69	ABAKI_c06940	Response regulator containing CheY-like receiver domain and AraC-type DNA-binding domain
	Scaffold1	742239	743498	-	C8	12581.3	9627.62	10804.5	5246.37	ABAKI_c06950	Histidine kinase
	Scaffold1	743987	744793	-	C10	152.113	155.805	174.745	48.3054	ABAKI_c06960	Uncharacterized protein
	Scaffold1	745147	745449	-	N/A	55.1617	39.2901	37.8177	22.9187	ABAKI_c06970	DNA integration/recombination/invertion protein
	Scaffold1	745442	745669	-	N/A	39.1468	30.09	58.7307	36.5143	ABAKI_c06980	Uncharacterized protein
	Scaffold1	745901	746002	-	N/A	3.81932	0.783037	7.07106	1.79826	ABAKI_c06990	Uncharacterized protein
	Scaffold1	746006	746821	-	N/A	83.3675	70.1632	66.0509	23.5281	ABAKI_c07000	Transcriptional regulator, XRE family
	Scaffold1	746969	747436	+	N/A	4.55698	5.1734	5.95642	12.0568	ABAKI_c07010	Uncharacterized protein
	Scaffold1	747433	747705	+	N/A	1.86599	2.16729	1.58092	10.7533	ABAKI_c07020	DNA primase (Bacterial type)
	Scaffold1	747686	748012	+	N/A	5.25097	4.57217	3.66009	13.0464	ABAKI_c07030	Uncharacterized protein
	Scaffold1	748009	748173	+	N/A	2.21298	1.38426	1.83004	5.79907	ABAKI_c07040	Uncharacterized protein
	Scaffold1	749022	749612	+	N/A	11.8923	21.9663	14.1421	17.892	ABAKI_c07050	Uncharacterized protein
	Scaffold1	749828	750241	+	N/A	5.29464	5.53703	3.49401	8.11027	ABAKI_c07060	Uncharacterized protein
	Scaffold1	750238	750375	+	N/A	2.69099	4.57217	2.37937	12.1292	ABAKI_c07070	Uncharacterized protein
	Scaffold1	750482	750913	+	N/A	8.0293	9.32617	7.3042	18.936	ABAKI_c07080	Uncharacterized protein
	Scaffold1	751017	751199	+	N/A	3.08166	0	2.29633	3.57841	ABAKI_c07090	Uncharacterized protein
	Scaffold1	751439	751669	+	N/A	8.63595	0.783037	3.41097	6.6982	ABAKI_c07100	Uncharacterized protein
	Scaffold1	751701	751964	+	N/A	6.46664	3.55155	6.82194	10.3309	ABAKI_c07110	Uncharacterized protein
	Scaffold1	751987	752241	+	N/A	5.38198	2.95033	5.24101	10.349	ABAKI_c07120	Uncharacterized protein
	Scaffold1	752243	752485	+	N/A	6.42297	2.5867	3.26086	8.51456	ABAKI_c07130	Uncharacterized protein
	Scaffold1	753602	754498	-	N/A	707.625	512.1	434.164	372.92	ABAKI_c07140	Uncharacterized protein
	Scaffold1	754601	755134	-	C11	2001.14	1214.45	911.387	1759.22	ABAKI_c07150	Uncharacterized protein
	Scaffold1	755162	755350	-	C6	1837.06	814.821	391.779	807.231	ABAKI_c07160	YcfA family protein
	Scaffold1	755716	756663	-	N/A	375.051	241.838	410.556	181.726	ABAKI_c07170	Uncharacterized protein
	Scaffold1	757108	757320	-	C14	255.756	150.072	136.484	70.1199	ABAKI_c07180	Transcriptional regulator
	Scaffold1	757479	757817	+	N/A	2.99431	0	0.71541	1.33964	ABAKI_c07190	Uncharacterized protein
	Scaffold1	758071	758424	+	N/A	3.81932	1.38426	1.43082	2.64306	ABAKI_c07200	Uncharacterized protein
	Scaffold1	759370	759912	-	C10	208.226	252.968	773.898	222.078	ABAKI_c07210	Uncharacterized protein
	Scaffold1	760186	761376	-	C8	530.59	708.931	851.996	121.279	ABAKI_c07220	Uncharacterized protein
	Scaffold1	761569	762477	-	C8	213.698	270.781	298.096	70.6387	ABAKI_c07230	Uncharacterized protein
	Scaffold1	762533	763918	-	C8	703.418	562.423	493.045	224.335	ABAKI_c07240	DNA integration/recombination/invertion protein
	Scaffold1	764073	764786	-	C10	134.666	114.823	186.396	44.7813	ABAKI_c07250	Putative prophage LambdaCh01, repressor protein
	Scaffold1	764936	765118	+	N/A	2.30032	4.39036	2.06319	0.458619	ABAKI_c07260	Uncharacterized protein
	Scaffold1	765115	765402	+	N/A	5.77265	15.2268	1.11464	4.47754	ABAKI_c07270	Uncharacterized protein
	Scaffold1	765399	765977	+	C14	18.7059	41.7095	7.62039	9.37748	ABAKI_c07280	DNA primase (Bacterial type)
	Scaffold1	765974	767569	+	C3	69.7863	113.621	27.3197	22.442	ABAKI_c07290	Uncharacterized protein
	Scaffold1	767853	768386	+	N/A	22.6102	31.4185	11.0314	9.41369	ABAKI_c07300	Uncharacterized protein
	Scaffold1	768391	768576	+	N/A	3.38498	5.95643	3.17782	3.59652	ABAKI_c07310	Uncharacterized protein
	Scaffold1	768587	768883	+	N/A	14.1489	20.2184	5.87338	4.42321	ABAKI_c07320	Uncharacterized protein
	Scaffold1	769034	769216	+	C14	160.839	366.128	60.2796	61.201	ABAKI_c07330	Uncharacterized protein
	Scaffold1	769283	769705	+	C14	128.942	207.413	69.8291	70.8682	ABAKI_c07340	Uncharacterized protein
	Scaffold1	770070	771149	+	N/A	222.159	285.644	276.119	104.317	ABAKI_c07350	Uncharacterized protein
	Scaffold1	771181	771309	+	C14	34.8058	42.3108	31.0788	9.30504	ABAKI_c07360	Uncharacterized protein
	Scaffold1	771480	772169	+	C8	108.671	222.473	161.12	39.4408	ABAKI_c07370	Uncharacterized protein
	Scaffold1	773099	773518	-	N/A	539.934	450.902	345.437	641.978	ABAKI_c07380	Antitoxin HicB
	Scaffold1	773563	773733	-	C3	896.057	523.443	258.972	477.552	ABAKI_c07390	YcfA-like protein
	Scaffold1	773948	775267	-	N/A	231.797	411.864	144.401	222.212	ABAKI_c07400	Sodium/hydrogen exchanger
	Scaffold1	775729	777225	+	C6	466.933	99.1066	104.054	165.072	ABAKI_c07410	Uncharacterized protein
	Scaffold1	777399	778655	-	C6	2253.49	518.939	1128.5	587.294	ABAKI_c07420	Arabinose efflux permease family protein
	Scaffold1	778732	779412	-	C6	1671.25	362.828	808.065	261.206	ABAKI_c07430	Uncharacterized protein
	Scaffold1	779731	779952	-	C4	566.143	1052.88	5252.82	5394.63	ABAKI_c07440	Uncharacterized protein
	Scaffold1	780043	780960	-	C7	846.768	1993.41	1848.92	1150.71	ABAKI_c07450	Putative ribosomal S6 modification protein
	Scaffold1	780954	781877	-	C7	770.433	1627.34	1556.89	1091.75	ABAKI_c07460	Putative ribosomal S6 modification protein
	Scaffold1	782005	783786	-	C8	1804.07	3609.64	2499.94	1326.68	ABAKI_c07470	Putative transport protein, ATPase and permease protein
	Scaffold1	783783	785522	-	N/A	1486.8	2615.32	2374.68	1448.81	ABAKI_c07480	Putative ABC transport system protein
	Scaffold1	785523	786998	-	C14	1508.49	3507.95	2248.24	1455.91	ABAKI_c07490	Uncharacterized protein
	Scaffold1	786947	787129	-	C8	137.311	370.77	260.831	75.056	ABAKI_c07500	Uncharacterized protein
	Scaffold1	787126	788838	-	C14	1662.46	4074.83	2393.28	1242.34	ABAKI_c07510	Uncharacterized protein
	Scaffold1	788851	789153	-	C10	234.449	334.443	536.551	197.965	ABAKI_c07520	Anti-sigma factor antagonist
	Scaffold1	789854	792079	+	N/A	13801.2	19726	11505.7	12117.1	ABAKI_c07530	Raf kinase inhibitor-like protein, YbhB/YbcL family
	Scaffold1	792160	795588	-	N/A	12194.8	12556.1	10857.9	12645.4	ABAKI_c07540	Pyruvate carboxylase
	Scaffold1	795741	796028	-	N/A	498.657	581.301	647.986	483.954	ABAKI_c07550	Uncharacterized protein
	Scaffold1	796035	796328	-	N/A	386.256	389.575	606.91	506.487	ABAKI_c07560	Bifunctional chorismate mutase/ prephenate dehydratase PheA2
	Scaffold1	796413	797492	-	N/A	3130.32	2600.95	2627.55	2781.97	ABAKI_c07570	Chorismate synthase
	Scaffold1	797470	798771	-	N/A	4867.6	4953.61	3794.24	3828.02	ABAKI_c07580	3-phosphoshikimate 1-carboxyvinyltransferase
	Scaffold1	798854	799921	-	N/A	2422.68	2400.75	2091.71	1845.53	ABAKI_c07590	3-dehydroquinate synthase
	Scaffold1	800334	801266	-	N/A	1467.46	1815.37	1222.19	913.57	ABAKI_c07600	Branched chain amino acid ABC transport system permease protein RbsC1
	Scaffold1	801267	802331	-	N/A	1156.12	1254.02	1368.19	1127.64	ABAKI_c07610	Branched chain amino acid ABC transport system permease protein RbsC2
	Scaffold1	802328	803854	-	N/A	1956.77	2206.76	1891.4	1454.76	ABAKI_c07620	Putative ABC transport system protein
	Scaffold1	803924	805018	-	N/A	14716.7	25754.1	16475.1	26430.1	ABAKI_c07630	Uncharacterized protein
	Scaffold1	805260	805862	+	C7	1450.58	2449.79	3239.33	2821.5	ABAKI_c07640	Uncharacterized protein
	Scaffold1	806349	807707	-	C9	483.603	263.385	250.684	650.402	ABAKI_c07650	Uncharacterized protein
	Scaffold1	807783	808463	-	C14	79.8126	106.336	69.695	51.1055	ABAKI_c07660	Uncharacterized protein
	Scaffold1	808456	809052	-	N/A	37.4968	60.8515	53.3747	37.9323	ABAKI_c07670	Uncharacterized protein
	Scaffold1	809067	810023	-	N/A	83.4986	113.09	97.663	75.4182	ABAKI_c07680	Uncharacterized protein
	Scaffold1	810020	810487	-	N/A	21.1349	35.8646	28.9837	36.3513	ABAKI_c07690	Uncharacterized protein
	Scaffold1	810438	810944	-	N/A	39.4065	70.345	43.7582	38.8677	ABAKI_c07700	Uncharacterized protein
	Scaffold1	810941	811348	-	N/A	28.5139	55.8455	48.4658	35.8384	ABAKI_c07710	Uncharacterized protein
	Scaffold1	811338	811835	-	C7	39.0595	80.8881	66.5682	106.996	ABAKI_c07720	Uncharacterized protein
	Scaffold1	811856	812212	-	N/A	94.3062	147.793	91.9269	123.036	ABAKI_c07730	Prepilin-type N-terminal cleavage/methylation domain-containing protein
	Scaffold1	812323	812937	-	N/A	2120.94	2521.8	2102.56	2469.13	ABAKI_c07740	Uncharacterized protein
	Scaffold1	812959	813396	-	N/A	1302.11	1272.07	924.038	837.022	ABAKI_c07750	Uncharacterized protein
	Scaffold1	813500	815431	-	C8	1918.16	1865.61	1327.28	519.327	ABAKI_c07760	NtrC family two-component system response regulator
	Scaffold1	815575	816648	-	C14	131.369	111.019	85.1689	33.3642	ABAKI_c07770	Xanthine and CO dehydrogenases maturation factor, XdhC/CoxF family
	Scaffold1	816728	819457	-	C4	71.3053	174.821	3081.08	6707.92	ABAKI_c07780	Aldehyde oxidase and xanthine dehydrogenase molybdopterin binding protein
	Scaffold1	819504	820535	-	C4	13.9743	72.4565	773.99	1374	ABAKI_c07790	Formylmethanofuran dehydrogenase subunit E region
	Scaffold1	820900	821856	-	C9	15475.8	19526.6	27606	96082.1	ABAKI_c07800	Uncharacterized protein
	Scaffold1	822478	822666	+	C8	5171.6	2280.24	2344.51	656.876	ABAKI_c07810	Uncharacterized protein
	Scaffold1	822768	823403	-	C10	61.063	57.8867	122.057	58.1899	ABAKI_c07820	UPF0316 protein AKG39_00335
	Scaffold1	823576	824961	-	C6	77.0756	15.8838	18.5016	38.2583	ABAKI_c07830	Uncharacterized protein
	Scaffold1	825238	825729	-	N/A	31.9862	27.0694	34.2087	47.2858	ABAKI_c07840	Uncharacterized protein
	Scaffold1	825717	827243	-	N/A	126.205	83.7682	134.152	141.175	ABAKI_c07850	K+ uptake protein, membrane subunit TrkH1
	Scaffold1	827248	827352	-	N/A	1.51899	0	3.01174	2.23877	ABAKI_c07860	Uncharacterized protein
	Scaffold1	827354	828019	-	N/A	46.6108	30.2718	24.7902	22.0196	ABAKI_c07870	K+ uptake protein, NAD-binding subunit TrkA1
	Scaffold1	828016	828669	-	N/A	9.32994	4.75399	4.29246	6.2939	ABAKI_c07880	K+ uptake protein, NAD-binding subunit TrkA2
	Scaffold1	829089	829478	+	N/A	18.2279	3.36973	6.68781	5.79907	ABAKI_c07890	Uncharacterized protein
	Scaffold1	829483	829572	+	N/A	0	0.783037	0.632369	0	ABAKI_c07900	K+-transporting ATPase, F subunit
	Scaffold1	829569	831257	+	C11	42.4032	39.598	11.3635	48.6797	ABAKI_c07910	Potassium-transporting ATPase potassium-binding subunit
	Scaffold1	831268	833322	+	C3	69.7863	42.1847	16.5886	41.1186	ABAKI_c07920	Potassium-transporting ATPase ATP-binding subunit
	Scaffold1	833333	833899	+	C12	90.0549	26.3567	76.2486	71.2304	ABAKI_c07930	Potassium-transporting ATPase KdpC subunit
	Scaffold1	833928	836639	+	N/A	813.394	544.598	759.998	723.334	ABAKI_c07940	Sensor protein KdpD
	Scaffold1	836632	837339	+	N/A	152.943	111.257	147.125	151.036	ABAKI_c07950	DNA-binding response regulator KdpE
	Scaffold1	837422	838303	-	C8	454.431	437.745	619.612	173.32	ABAKI_c07960	Uncharacterized protein
	Scaffold1	838559	839098	-	N/A	33.6362	56.9364	51.0783	34.9936	ABAKI_c07970	Permease
	Scaffold1	839095	839571	-	N/A	27.0822	44.0999	43.3749	25.5256	ABAKI_c07980	Permease
	Scaffold1	840200	840637	+	C3	235.053	290.777	133.219	136.324	ABAKI_c07990	Protein-tyrosine phosphatase, low molecular weight
	Scaffold1	840666	841094	+	C14	197.687	325.075	145.199	132.196	ABAKI_c08000	Uncharacterized protein
	Scaffold1	841075	841335	-	C4	33.1145	69.7996	131.504	71.2603	ABAKI_c08010	Permease
	Scaffold1	841359	841718	-	N/A	77.8156	179.309	178.46	79.3344	ABAKI_c08020	Putative uncharacterized protein
	Scaffold1	842040	842396	-	C11	130.849	111.802	62.6079	272.086	ABAKI_c08030	Arsenite efflux ATP-binding protein ArsA
	Scaffold1	842457	842732	-	C9	81.7223	89.9622	45.8213	170.967	ABAKI_c08040	Uncharacterized protein
	Scaffold1	842859	844568	-	C11	685.231	484.417	243.313	813.277	ABAKI_c08050	Arsenical pump-driving ATPase
	Scaffold1	844728	846113	-	C11	116.705	148.52	43.3909	154.892	ABAKI_c08060	Dihydrolipoyl dehydrogenase
	Scaffold1	846298	846708	-	C11	395.062	505.797	163.481	448.297	ABAKI_c08070	Uncharacterized protein
	Scaffold1	846710	847111	-	C11	571.796	657.086	176.729	475.428	ABAKI_c08080	Uncharacterized protein
	Scaffold1	847104	847952	-	C11	498.227	685.081	284.561	796.592	ABAKI_c08090	Glycine cleavage system H protein GcvH2
	Scaffold1	847945	848247	-	C11	234.228	320.168	113.619	206.148	ABAKI_c08100	Uncharacterized protein
	Scaffold1	848250	848621	-	N/A	191.653	224.402	123.22	208.115	ABAKI_c08110	Uncharacterized protein
	Scaffold1	848871	849236	+	N/A	25.8665	47.2466	31.9283	57.5805	ABAKI_c08120	Uncharacterized protein
	Scaffold1	849756	850460	+	C14	34.6311	89.6131	23.7746	23.6911	ABAKI_c08130	Signal transduction histidine kinase
	Scaffold1	850584	850901	+	C13	16.3183	59.3267	9.99976	8.49646	ABAKI_c08140	Histidine kinase
	Scaffold1	850989	851141	+	N/A	0.737661	1.56607	0.71541	0.44051	ABAKI_c08150	Uncharacterized protein
	Scaffold1	851155	851448	+	N/A	3.08166	10.1092	5.47416	6.20336	ABAKI_c08160	Uncharacterized protein
	Scaffold1	851644	852393	-	C6	20741.7	3642.77	3990.96	2818.74	ABAKI_c08170	Transcriptional regulator
	Scaffold1	852489	852629	-	C6	1198.51	171.073	217.785	86.8955	ABAKI_c08180	Uncharacterized protein
	Scaffold1	852964	853905	-	C6	31564.6	5140.7	2618.53	1749.66	ABAKI_c08190	TrpH protein
	Scaffold1	853915	854763	-	C6	23082.7	3728.79	2621.12	2187.57	ABAKI_c08200	Fructose-1,6-bisphosphate aldolase Fba2
	Scaffold1	854885	856201	-	C5	35074	1608.04	539.793	328.918	ABAKI_c08210	Transaldolase
	Scaffold1	856229	857176	-	C5	23800	804.489	422.948	278.277	ABAKI_c08220	Transketolase, subunit B
	Scaffold1	857173	858018	-	C5	18800.4	735.708	497.497	306.313	ABAKI_c08230	Transketolase, subunit A
	Scaffold1	858827	859921	-	C11	195.817	370.896	184.815	426.621	ABAKI_c08240	Iron-containing alcohol dehydrogenase
	Scaffold1	860205	861005	-	C7	77.903	209.595	80.03	161.33	ABAKI_c08250	HAD hydrolase family IIB
	Scaffold1	861064	862215	-	C11	80.8536	233.491	96.6283	263.155	ABAKI_c08260	1,3-propanediol dehydrogenase
	Scaffold1	862327	863886	-	C1	102.379	497.841	141.955	609.554	ABAKI_c08270	Xylulose kinase XylB
	Scaffold1	864184	864903	-	C7	361.253	1259.77	397.234	775.759	ABAKI_c08280	Deoxyribose-phosphate aldolase
	Scaffold1	865298	866182	+	C3	2725.76	1774.72	1037.84	970.263	ABAKI_c08290	Uncharacterized protein
	Scaffold1	867207	867344	-	N/A	22.6975	10.2353	13.5768	5.78096	ABAKI_c08300	Uncharacterized protein
	Scaffold1	867969	868628	-	C10	94.3499	55.3	103.223	38.2823	ABAKI_c08310	Uncharacterized protein
	Scaffold1	869093	870079	+	C14	62.2327	106.993	26.4702	29.8039	ABAKI_c08320	Putative uncharacterized protein
	Scaffold1	870171	871253	+	C3	132.152	231.072	53.8058	67.0001	ABAKI_c08330	Uncharacterized protein
	Scaffold1	871301	872269	+	C14	110.28	200.814	69.778	69.9872	ABAKI_c08340	Uncharacterized protein
	Scaffold1	873509	873787	+	N/A	172.168	129.449	247.471	223.799	ABAKI_c08350	Uncharacterized protein
	Scaffold1	873801	873914	+	N/A	49.69	46.7569	65.5686	41.8186	ABAKI_c08360	Uncharacterized protein
	Scaffold1	874440	875246	-	N/A	90.2709	75.3366	100.276	93.437	ABAKI_c08370	Methyltransferase 1 MttB19
	Scaffold1	875322	875948	-	N/A	46.4821	77.0287	75.8015	90.0397	ABAKI_c08380	Methionine synthase
	Scaffold1	875975	877006	-	N/A	76.2966	83.95	109.691	129.294	ABAKI_c08390	Putative uncharacterized protein
	Scaffold1	877179	878618	+	C14	364.43	641.103	401.405	238.546	ABAKI_c08400	Uncharacterized protein
	Scaffold1	879311	881173	-	N/A	84.8452	82.6773	72.4736	31.9522	ABAKI_c08410	Putative methyl-accepting chemotaxis transducer protein
	Scaffold1	881423	882796	-	N/A	47.0451	34.0052	33.3081	30.4074	ABAKI_c08420	Dihydrolipoyl dehydrogenase
	Scaffold1	882869	883072	-	N/A	5.68531	4.75399	3.89323	9.0094	ABAKI_c08430	Uncharacterized protein
	Scaffold1	883069	885363	-	C12	87.7983	47.666	55.0546	101.855	ABAKI_c08440	Hydrogenase
	Scaffold1	885470	888298	-	N/A	86.3666	68.248	59.8293	110.901	ABAKI_c08450	Aldehyde oxidoreductase Mop3
	Scaffold1	888291	888572	-	N/A	5.64163	5.11763	4.75875	4.05514	ABAKI_c08460	Haloacetate dehalogenase H-1, putative
	Scaffold1	888599	889369	-	N/A	6.16331	9.50798	5.24101	5.85339	ABAKI_c08470	Uncharacterized protein
	Scaffold1	889478	890608	+	N/A	225.282	318.559	328.967	333.51	ABAKI_c08480	Regulatory protein, LuxR
	Scaffold1	890621	891199	-	N/A	11.7176	7.15887	8.18569	12.4792	ABAKI_c08490	Uncharacterized protein
	Scaffold1	891224	892564	-	N/A	18.2279	17.2123	12.6283	35.066	ABAKI_c08500	Acetyl-CoA hydrolase/transferase
	Scaffold1	892625	893665	-	N/A	18.7933	10.291	11.3635	26.6239	ABAKI_c08510	Putative L-iditol/sorbitol 2-dehydrogenase
	Scaffold1	893687	894499	-	N/A	13.2366	5.77462	4.14236	22.4601	ABAKI_c08520	3-oxoacyl-(Acyl-carrier-protein) reductase
	Scaffold1	894518	895498	-	N/A	18.1842	8.54313	6.43869	21.6696	ABAKI_c08530	Transketolase central region
	Scaffold1	895498	896490	-	N/A	7.29164	4.75399	4.60864	20.2757	ABAKI_c08540	Pyruvate dehydrogenase
	Scaffold1	896510	897211	-	N/A	7.07328	3.97095	3.57705	7.61543	ABAKI_c08550	Acetyltransferase component of pyruvate dehydrogenase complex
	Scaffold1	897220	897453	-	N/A	1.12833	0.60122	1.51386	0.899129	ABAKI_c08560	2-oxoglutarate dehydrogenase, E2 component, dihydrolipoamide succinyltransferase
	Scaffold1	899038	899307	-	N/A	8.3763	2.16729	5.15797	3.15601	ABAKI_c08570	YbaK-like protein
	Scaffold1	899310	900182	-	N/A	24.2602	18.0511	15.3398	26.111	ABAKI_c08580	EamA-like transporter family protein
	Scaffold1	900355	900642	-	N/A	7.59496	6.32007	1.83004	3.59652	ABAKI_c08590	Uncharacterized protein
	Scaffold1	900786	902180	-	C11	98.4749	179.435	73.6233	192.456	ABAKI_c08600	Trimethylamine methyltransferase
	Scaffold1	902267	903895	-	C11	64.579	110.726	42.8767	156.491	ABAKI_c08610	Choline/carnitine/betaine transporter
	Scaffold1	904132	905478	+	C14	828.63	1064.1	556.202	497.893	ABAKI_c08620	Transcriptional regulatory protein ZraR
	Scaffold1	905496	906854	+	C3	1122.44	1343.24	511.234	404.438	ABAKI_c08630	Two component, sigma54 specific, transcriptional regulator, Fis family
	Scaffold1	907543	907800	+	C10	626.728	829.43	1513.89	927.677	ABAKI_c08640	Uncharacterized protein
	Scaffold1	907813	908364	-	N/A	321.98	170.739	168.939	121.72	ABAKI_c08650	Shikimate kinase
	Scaffold1	908366	909226	-	N/A	501.391	258.757	297.646	284.239	ABAKI_c08660	Shikimate dehydrogenase (NADP(+))
	Scaffold1	909402	910742	+	N/A	961.391	1543.2	1240.26	1490.55	ABAKI_c08670	Uracil permease UraA
	Scaffold1	910966	911718	+	N/A	1549.71	1632.72	1301.93	1017.36	ABAKI_c08680	Maebl
	Scaffold1	911761	912684	+	C10	1483.2	1752.38	2520.28	1216.47	ABAKI_c08690	Mg2+ transporter protein CorA2
	Scaffold1	912709	921480	-	C6	3693.93	453.826	334.588	586.075	ABAKI_c08700	Cellobiose phosphorylase
	Scaffold1	921927	922757	-	C5	446.625	70.876	47.2171	133.843	ABAKI_c08710	Pyruvate-formate lyase-activating enzyme
	Scaffold1	922754	924139	-	C6	901.585	147.374	73.5882	200.367	ABAKI_c08720	Protein CA_C1420
	Scaffold1	924362	924871	-	N/A	470.924	323.383	523.642	366.935	ABAKI_c08730	Uncharacterized protein
	Scaffold1	924897	925751	-	N/A	536.763	379.592	495.118	393.215	ABAKI_c08740	Nicotinate-nucleotide pyrophosphorylase
	Scaffold1	925723	927030	-	N/A	693.578	544.738	711.823	543.689	ABAKI_c08750	Fumarate reductase Frd
	Scaffold1	927045	927953	-	N/A	339.691	244.65	263.392	266.184	ABAKI_c08760	Quinolinate synthase
	Scaffold1	928200	929000	-	C4	531.038	859.101	1503.37	1045.3	ABAKI_c08770	Uncharacterized protein
	Scaffold1	929460	930953	-	C8	787.008	1117.38	613.403	241.195	ABAKI_c08780	Adenylate cyclase
	Scaffold1	931422	931916	-	C8	5607.02	8514.7	7215.92	3866.82	ABAKI_c08790	NADPH-dependent 7-cyano-7-deazaguanine reductase
	Scaffold1	931926	932429	-	N/A	2815.02	4273.92	3405.73	2803.92	ABAKI_c08800	Uncharacterized protein
	Scaffold1	932676	933545	-	N/A	1630.84	1990.41	1094.84	1046.4	ABAKI_c08810	DegV domain-containing protein
	Scaffold1	933804	934736	-	C11	640.45	480	247.608	496.729	ABAKI_c08820	UbiA prenyltransferase family protein
	Scaffold1	934718	935692	-	C11	599.306	482.922	192.084	444.743	ABAKI_c08830	Geranylgeranyl pyrophosphate synthase
	Scaffold1	935685	937610	-	C3	1514.6	1276.01	361.103	799.916	ABAKI_c08840	NADH dehydrogenase, FAD-containing subunit
	Scaffold1	937731	938267	-	C3	3070.3	3376.53	751.956	974.454	ABAKI_c08850	Uncharacterized protein
	Scaffold1	938455	938724	-	N/A	255.055	371.706	147.844	161.686	ABAKI_c08860	Uncharacterized protein
	Scaffold1	938703	939377	-	C14	1117.49	1740.57	604.694	831.312	ABAKI_c08870	Ubiquinone biosynthesis methyltransferase UbiE
	Scaffold1	939388	940140	-	C11	894.942	1283.63	632.013	1366.72	ABAKI_c08880	Probable ABC transporter ATP-binding protein
	Scaffold1	940118	941095	-	C11	1371.34	2095.32	651.668	1839.69	ABAKI_c08890	Hydroxymethylpyrimidine-binding protein
	Scaffold1	941097	941864	-	C11	1377.64	1929.91	584.982	1691.22	ABAKI_c08900	ABC transporter, permease protein
	Scaffold1	941839	942126	-	C11	536.45	611.687	251.85	754.254	ABAKI_c08910	Uncharacterized protein
	Scaffold1	942552	942914	-	C5	65.0983	12.5141	86.6668	876.593	ABAKI_c08920	Uncharacterized protein
	Scaffold1	942957	944360	-	C5	354.874	82.0203	335.278	4030.67	ABAKI_c08930	Dihydrolipoyl dehydrogenase
	Scaffold1	944374	945681	-	C5	153.938	32.9846	159.421	2269.48	ABAKI_c08940	TPP-dependent acetoin dehydrogenase complex, E2 component, dihydrolipoyllysine-residue acetyltransferase
	Scaffold1	945698	946699	-	C5	124.033	24.0075	153.548	2437.34	ABAKI_c08950	Acetoin catabolism protein X
	Scaffold1	946817	947788	-	C5	462.031	95.1914	774.246	7312.05	ABAKI_c08960	2-oxoisovalerate dehydrogenase subunit beta
	Scaffold1	947785	948771	-	C5	509.559	92.4931	666.723	5639.96	ABAKI_c08970	Acetoin:2,6-dichlorophenolindophenol oxidoreductase subunit alpha
	Scaffold1	948833	949135	-	C5	99.5595	15.2826	126.046	1739.53	ABAKI_c08980	Uncharacterized protein
	Scaffold1	949360	950418	-	N/A	14.9716	10.7104	8.58492	32.6643	ABAKI_c08990	(R,R)-butanediol dehydrogenase BdhA
	Scaffold1	950715	952631	-	N/A	492.578	331.187	211.269	385.23	ABAKI_c09000	Putative sigma54 specific transcriptional regulator with PAS/PAC sensor
	Scaffold1	953001	954032	-	C14	2571.01	3641.45	2484.61	1538.74	ABAKI_c09010	Formylmethanofuran dehydrogenase subunit E region
	Scaffold1	954427	955038	+	N/A	2645.7	2511.94	1679.86	1786.09	ABAKI_c09020	Selenium metabolism protein
	Scaffold1	955035	955295	+	C3	1741.62	1460.38	610.478	635.413	ABAKI_c09030	Uncharacterized protein
	Scaffold1	955296	956468	-	C8	3239.69	2379.61	2677.8	505.105	ABAKI_c09040	Cysteine desulfurase
	Scaffold1	956465	957226	-	C8	3009.53	3085.04	2191.96	458.271	ABAKI_c09050	Benzoyl CoA reductase subunit
	Scaffold1	957235	958386	-	C8	1199.3	1959.15	2600.11	574.222	ABAKI_c09060	Uncharacterized protein
	Scaffold1	958678	960054	-	C7	2988.87	12408.6	15158.9	27401.4	ABAKI_c09070	Iron hydrogenase HydA2
	Scaffold1	960082	960642	-	C7	683.547	3376.72	2954.89	6798.58	ABAKI_c09080	Hydrogenase Fe-S subunit HycB3
	Scaffold1	960662	961444	-	C7	1166.36	4041.85	5365.22	7948.46	ABAKI_c09090	formate dehydrogenase accessory protein FdhD
	Scaffold1	961692	962228	-	C7	1418.68	3928.57	5108.69	13148.8	ABAKI_c09100	Hydrogenase Fe-S subunit HycB2
	Scaffold1	962232	964400	-	C7	6154.41	16011.3	20750.1	45514.7	ABAKI_c09110	Formate dehydrogenase H FdhF2
	Scaffold1	964852	965385	-	N/A	13.9743	10.8922	15.3398	17.4877	ABAKI_c09120	Hydrogenase Fe-S subunit HycB1
	Scaffold1	965382	965774	-	N/A	8.24528	12.2765	6.03946	7.15682	ABAKI_c09130	Formate dehydrogenase H
	Scaffold1	965930	966511	+	N/A	621.266	951.303	1006.1	750.592	ABAKI_c09140	Probable molybdenum cofactor guanylyltransferase
	Scaffold1	966949	967500	-	N/A	840.086	1026.33	1035.32	721.565	ABAKI_c09150	Uncharacterized protein
	Scaffold1	967553	967741	-	C10	257.312	119.521	199.615	61.2612	ABAKI_c09160	Uncharacterized protein
	Scaffold1	967796	969685	-	C8	3459.2	4089	3420.35	1651.81	ABAKI_c09170	Selenocysteine-specific translation elongation factor SelB
	Scaffold1	969700	971094	-	N/A	2779.48	3388.73	2895.55	1792.18	ABAKI_c09180	L-seryl-tRNA(Sec) selenium transferase
	Scaffold1	971153	971596	-	N/A	1024.18	1418.79	1402.21	955.405	ABAKI_c09190	Hydrolase, TatD family
	Scaffold1	971615	972112	-	N/A	605.375	793.233	882.681	762.473	ABAKI_c09200	Molybdopterin-guanine dinucleotide biosynthesis protein B
	Scaffold1	972159	973367	-	N/A	3168.35	3608.26	3913.01	3509.65	ABAKI_c09210	Molybdopterin biosynthesis protein MoeA1
	Scaffold1	973782	974825	-	N/A	1133.55	1048.54	1349.98	871.865	ABAKI_c09220	Selenide, water dikinase
	Scaffold1	975008	975790	-	N/A	241.217	307.191	249.1	328.044	ABAKI_c09230	Hydroxyethylthiazole kinase ThiM/ThiK (FS)
	Scaffold1	975787	976437	-	N/A	189.784	234.735	229.049	286.177	ABAKI_c09240	Pseudouridine synthase
	Scaffold1	976434	977075	-	N/A	235.403	362.576	276.19	339.841	ABAKI_c09250	Thiamine-phosphate synthase
	Scaffold1	977062	977886	-	N/A	140.961	165.706	220.621	267.102	ABAKI_c09260	Hydroxyethylthiazole kinase
	Scaffold1	978395	979462	+	C7	1410.06	2885.49	5847.52	3445.94	ABAKI_c09270	Response regulator receiver modulated metal dependent phosphohydrolase
	Scaffold1	979595	980662	-	N/A	858.576	823.308	1317.71	1347.29	ABAKI_c09280	Molybdate/tungsten ABC transport system ATP-binding protein ModC2
	Scaffold1	980667	981359	-	C12	635.851	418.281	859.133	1239.3	ABAKI_c09290	Molybdate/tungsten ABC transport system permease protein ModB2
	Scaffold1	981562	982512	+	C12	1107.77	439.772	1322.99	2153.38	ABAKI_c09300	Putative molybdate-binding protein
	Scaffold1	982615	983757	-	N/A	466.416	391.156	503.096	406.95	ABAKI_c09310	TDP-4-oxo-6-deoxy-D-glucose transaminase RffA1
	Scaffold1	983934	984719	-	N/A	546.883	533.802	783.182	911.5	ABAKI_c09320	Taurine ABC transport system ATP-binding protein TauB
	Scaffold1	984730	985764	-	N/A	828.717	711.351	825.062	918.107	ABAKI_c09330	Taurine ABC transport system substrate-binding protein TauA
	Scaffold1	985775	986560	-	N/A	534.508	463.85	588.587	782.749	ABAKI_c09340	Taurine ABC transport system permease protein TauC
	Scaffold1	986854	988551	-	C9	228.456	267.971	253.242	1201.04	ABAKI_c09350	FAD-dependent pyridine nucleotide-disulphide oxidoreductase
	Scaffold1	988634	989938	-	C10	444.097	482.209	1029.66	515.835	ABAKI_c09360	Putative membrane protein
	Scaffold1	990030	990959	-	C10	2643.68	2697.08	5293.23	1246.85	ABAKI_c09370	Sulfurtransferase
	Scaffold1	991150	992706	+	N/A	429.783	339.715	588.785	459.527	ABAKI_c09380	Uncharacterized protein
	Scaffold1	992684	993409	-	N/A	534.207	668.257	433.765	544.19	ABAKI_c09390	Nitrate/sulfonate/bicarbonate ABC transport system substrate binding protein SsuA1
	Scaffold1	993394	994179	-	N/A	522.752	480.153	400.17	418.349	ABAKI_c09400	Nitrate/sulfonate/bicarbonate ABC transport system permease protein SsuC1
	Scaffold1	994166	995131	-	N/A	1135.68	1321.54	700.083	805.511	ABAKI_c09410	Nitrate/sulfonate/bicarbonate ABC transport system substrate binding protein SsuA2
	Scaffold1	995134	996408	-	N/A	1256.47	1163.11	674.584	645.725	ABAKI_c09420	Putative carbamoyl-phosphate synthase large chain
	Scaffold1	996441	997124	-	N/A	439.164	395.687	336.147	198.774	ABAKI_c09430	Putative sugar transferase
	Scaffold1	997273	997485	+	C3	307.227	146.884	113.875	130.766	ABAKI_c09440	SirA family protein
	Scaffold1	997482	998375	-	C14	1572.75	1650.86	1372.17	727.659	ABAKI_c09450	LysR family transcriptional regulator
	Scaffold1	998496	999014	-	N/A	550.737	398.707	439.836	357.364	ABAKI_c09460	Putative membrane protein
	Scaffold1	999133	999786	-	N/A	707.499	657.295	842.459	798.861	ABAKI_c09470	Putative membrane protein
	Scaffold1	1000079	1001092	-	C3	1121.96	890.98	408.247	524.554	ABAKI_c09480	Cation diffusion facilitator transporter
	Scaffold1	1001171	1002187	-	C11	2946.99	1978.63	1291.83	2397.12	ABAKI_c09490	Uncharacterized protein
	Scaffold1	1002235	1002591	-	N/A	202.633	152.336	157.69	296.996	ABAKI_c09500	Transcriptional regulator
	Scaffold1	1002769	1003155	-	N/A	2321.96	1450.67	1324.2	1759.27	ABAKI_c09510	Arsenite efflux ATP-binding protein ArsA
	Scaffold1	1003453	1004169	-	C3	878.524	840.758	259.151	329.642	ABAKI_c09520	Glutamine amidotransferase
	Scaffold1	1004477	1005628	+	C7	95.6505	291.923	333.557	771.146	ABAKI_c09530	Cysteine desulfurase
	Scaffold1	1005628	1006170	+	C7	91.9209	390.751	171.82	363.55	ABAKI_c09540	Acetyl-CoA decarbonylase/synthase complex subunit gamma 1
	Scaffold1	1006390	1006704	+	N/A	0.390666	0.60122	1.11464	4.91805	ABAKI_c09550	Thioredoxin reductase
	Scaffold1	1006740	1008311	+	C12	26.4732	13.8426	31.8613	55.3779	ABAKI_c09560	Sarcosine oxidase, subunit alpha
	Scaffold1	1008329	1008649	+	N/A	4.16631	5.1734	7.95255	9.92664	ABAKI_c09570	Opine oxidase subunit A
	Scaffold1	1008660	1009787	+	N/A	17.9246	15.828	22.0787	39.266	ABAKI_c09580	FAD dependent oxidoreductase
	Scaffold1	1009799	1010203	+	N/A	9.85162	11.8571	14.5413	18.1093	ABAKI_c09590	Endoribonuclease L-PSP/chorismate mutase
	Scaffold1	1010363	1011781	+	C11	11.0673	3.36973	1.91309	17.0835	ABAKI_c09600	Amino acid permease
	Scaffold1	1012035	1012877	+	C3	1262.97	604.273	609.385	683.331	ABAKI_c09610	AraC family transcriptional regulator
	Scaffold1	1012874	1013035	+	C12	113.706	63.2977	109.959	133.862	ABAKI_c09620	Uncharacterized protein
	Scaffold1	1013134	1013574	-	N/A	1074.84	582.239	594.662	413.937	ABAKI_c09630	Transcriptional regulator MarR family protein homolog
	Scaffold1	1013652	1014131	-	C12	611.37	121.325	230.288	150.492	ABAKI_c09640	Glutathione peroxidase
	Scaffold1	1014289	1014609	-	C12	3407.82	804.266	3207.55	4349.81	ABAKI_c09650	Uncharacterized protein
	Scaffold1	1014821	1016005	-	C6	13108.5	970.389	2488.32	525.658	ABAKI_c09660	Aminotransferase class I and II
	Scaffold1	1015995	1016396	-	C6	2553.83	242.16	853.117	191.888	ABAKI_c09670	MmcQ
	Scaffold1	1016559	1016693	-	C2	5691.3	28.8876	6764.65	335.581	ABAKI_c09680	Uncharacterized protein
	Scaffold1	1016708	1018837	-	C2	170471	1722.28	87925.3	6442.64	ABAKI_c09690	Ferrous iron transport protein B
	Scaffold1	1018910	1019131	-	C2	15606.9	329.286	8948.83	790.153	ABAKI_c09700	Fe2+ transport system protein A
	Scaffold1	1019179	1019388	-	C2	35060.2	612.455	8873.76	685.407	ABAKI_c09710	Ferrous iron transport protein FeoA
	Scaffold1	1019788	1019976	-	C9	801.41	711.506	887.536	3753.11	ABAKI_c09720	Ferredoxin
	Scaffold1	1020144	1022210	-	C6	3311.73	1279.16	689.454	1052.6	ABAKI_c09730	Copper-transporting ATPase
	Scaffold1	1023104	1023415	+	C2	6794.13	84.3694	3640.28	63.7114	ABAKI_c09740	Uncharacterized protein
	Scaffold1	1023519	1024274	-	C7	1762.35	4283.25	2477.69	3643.51	ABAKI_c09750	Oligopeptide ABC transport system ATP-binding protein OppF3
	Scaffold1	1024258	1025064	-	C7	2150.46	4827.42	2828.64	2881.86	ABAKI_c09760	Dipeptide transport ATP-binding protein dppD
	Scaffold1	1025091	1026647	-	C7	2982.64	7317.09	5978.99	7442.05	ABAKI_c09770	Oligopeptide ABC transport system substrate binding protein OppA3
	Scaffold1	1026662	1027522	-	C7	1460.41	2904.24	3187.81	3600.77	ABAKI_c09780	Oligopeptide ABC transport system permease OppC3
	Scaffold1	1027526	1028467	-	N/A	2519.17	3741.07	3728.82	4511.39	ABAKI_c09790	Oligopeptide ABC transport system permease OppB3
	Scaffold1	1028689	1029447	-	C7	7713.53	15911.2	14020.3	14344.8	ABAKI_c09800	Demethylmenaquinone methyltransferase
	Scaffold1	1029766	1029975	-	N/A	17.0996	2.5867	12.6953	13.7826	ABAKI_c09810	Copper ion binding protein
	Scaffold1	1030273	1030473	+	C4	24917.3	18256.9	53621	44762.4	ABAKI_c09820	Cold shock protein CspL
	Scaffold1	1030613	1030822	+	C12	6640.73	2915.76	13371.4	11913	ABAKI_c09830	Molybdenum-pterin-binding protein
	Scaffold1	1030934	1031728	-	C12	1612.67	661.084	1154.69	1156.35	ABAKI_c09840	Molybdenum/tungsten ABC transport system substrate binding protein ModA2
	Scaffold1	1031954	1032475	+	N/A	1607.35	1621.52	2068.45	1219.52	ABAKI_c09850	Molybdate ABC transporter, ATPase subunit
	Scaffold1	1032550	1034274	-	N/A	6704.47	8420.98	4851.31	4753.14	ABAKI_c09860	Metal dependent phosphohydrolase
	Scaffold1	1034271	1035083	-	C3	5073.24	6053.7	2542.5	2546.34	ABAKI_c09870	Putative xanthine dehydrogenase accessory factor
	Scaffold1	1035306	1036697	-	N/A	3388.26	4394.59	2845.27	3039.52	ABAKI_c09880	Radical SAM domain protein
	Scaffold1	1036694	1038073	-	C3	7568.71	9371.2	3903.94	3912.72	ABAKI_c09890	Uncharacterized protein
	Scaffold1	1038092	1038547	-	C3	2069.97	2399.45	1220.45	1108.01	ABAKI_c09900	Uncharacterized protein
	Scaffold1	1038540	1039280	-	N/A	2363.83	2721.77	2152.8	1652.87	ABAKI_c09910	Demethylmenaquinone methyltransferase
	Scaffold1	1039280	1039486	-	N/A	425.141	611.517	479.194	548.468	ABAKI_c09920	DNA-binding protein
	Scaffold1	1039486	1041855	-	N/A	10845.1	13534.9	6258.34	8062.59	ABAKI_c09930	Glutamate synthase beta subunit, putative
	Scaffold1	1041960	1044686	-	C9	31487.6	47795.4	33255.4	105529	ABAKI_c09940	Aldehyde oxidase and xanthine dehydrogenase molybdopterin binding protein
	Scaffold1	1045306	1047168	-	N/A	2083.78	1982.9	1689.72	2413.73	ABAKI_c09950	1-deoxy-D-xylulose-5-phosphate synthase
	Scaffold1	1047372	1047881	-	C11	85.5392	94.0447	34.1576	157.553	ABAKI_c09960	ThiW protein
	Scaffold1	1047862	1049184	-	C11	207.711	319.734	138.112	493.145	ABAKI_c09970	Phosphomethylpyrimidine synthase
	Scaffold1	1049563	1051278	-	C11	235.788	474.449	126.116	436.422	ABAKI_c09980	Hydroxylamine reductase
	Scaffold1	1051552	1053024	+	N/A	2046.59	1849.82	1343.11	1039.92	ABAKI_c09990	Putative uncharacterized protein
	Scaffold1	1053119	1053550	+	N/A	429.875	465.92	585.39	478.976	ABAKI_c10000	Pyridoxamine 5'-phosphate oxidase-like domain protein
	Scaffold1	1053666	1055606	-	C11	439.644	283.492	158.607	881.448	ABAKI_c10010	Conserved uncharacterized protein
	Scaffold1	1055621	1056292	-	C5	45.8755	21.4208	12.7943	186.246	ABAKI_c10020	Membrane protein
	Scaffold1	1056332	1057006	-	C5	61.6284	29.433	20.3477	237.412	ABAKI_c10030	Molecular chaperone
	Scaffold1	1057185	1057862	+	C9	176.028	91.6398	201.985	434.907	ABAKI_c10040	Two component transcriptional regulator, winged helix family
	Scaffold1	1057873	1059087	+	C12	383.648	224.276	373.287	554.214	ABAKI_c10050	Putative uncharacterized protein
	Scaffold1	1059405	1059506	+	C5	2.64732	0	3.01174	27.0644	ABAKI_c10060	Uncharacterized protein
	Scaffold1	1059652	1060119	+	C5	9.02661	2.5867	12.162	112.59	ABAKI_c10070	Uncharacterized protein
	Scaffold1	1060180	1061268	-	N/A	90.2272	87.3755	85.434	55.052	ABAKI_c10080	Uncharacterized protein
	Scaffold1	1061410	1061652	-	C12	95.2185	25.7554	48.1496	68.5751	ABAKI_c10090	Uncharacterized protein
	Scaffold1	1061878	1062699	-	C7	652.466	1225.51	2291.89	1598.93	ABAKI_c10100	ABC transporter, ATP-binding protein SP1715
	Scaffold1	1062693	1063388	-	C7	472.402	855.539	1112.56	885.908	ABAKI_c10110	ABC transport system ATP-binding protein
	Scaffold1	1063369	1063752	-	C8	793.516	1074.11	893.189	465.139	ABAKI_c10120	Transcriptional regulator, GntR family
	Scaffold1	1064041	1064202	-	N/A	49.0834	23.1687	48.2518	24.4273	ABAKI_c10130	Uncharacterized protein
	Scaffold1	1064484	1065191	+	C3	3152.09	1751.44	535.494	446.776	ABAKI_c10140	Pirin domain protein
	Scaffold1	1065312	1066826	-	N/A	688.54	479.916	535.778	438.087	ABAKI_c10150	Uncharacterized protein
	Scaffold1	1067138	1067650	-	N/A	104.291	100.086	87.6473	73.0527	ABAKI_c10160	Uncharacterized protein
	Scaffold1	1067730	1068230	-	N/A	4.51331	7.64855	6.1225	11.3025	ABAKI_c10170	Membrane protein
	Scaffold1	1068383	1069738	-	N/A	173.774	210.337	142.089	243.676	ABAKI_c10180	UPF0272 protein Awo_c32360
	Scaffold1	1069917	1071068	-	N/A	1116.67	1193.11	1493.36	2236.53	ABAKI_c10190	Aldo/keto reductase
	Scaffold1	1071279	1071656	-	N/A	282.445	246.061	252.664	397.348	ABAKI_c10200	MerR family transcriptional regulator
	Scaffold1	1071701	1072819	-	N/A	363.646	412.967	318.731	361.323	ABAKI_c10210	Aldo/keto reductase
	Scaffold1	1073097	1073438	-	N/A	314.468	495.254	706.317	241.599	ABAKI_c10220	Alkylphosphonate utilization protein
	Scaffold1	1073772	1075136	-	N/A	1129.57	593.844	844.167	893.789	ABAKI_c10230	Coenzyme F390 synthetase-like protein
	Scaffold1	1075138	1075776	-	C12	254.232	107.902	164.477	148.585	ABAKI_c10240	Lmo1962 protein
	Scaffold1	1076024	1076383	-	C11	452.354	239.377	179.153	402.858	ABAKI_c10250	Uncharacterized protein
	Scaffold1	1076446	1076757	-	C11	279.58	169.466	118.643	260.373	ABAKI_c10260	Uncharacterized protein
	Scaffold1	1076821	1077258	-	N/A	1680.14	968.752	1521.55	1488.01	ABAKI_c10270	MarR family transcriptional regulator
	Scaffold1	1077568	1077939	-	N/A	1084.46	1464.12	1468.36	1194.78	ABAKI_c10280	UPF0251 protein CA_C3166
	Scaffold1	1077978	1078346	-	N/A	655.555	957.904	792.387	657.022	ABAKI_c10290	Dinitrogenase iron-molybdenum cofactor biosynthesis protein
	Scaffold1	1078540	1079460	-	N/A	2071.46	2997.56	2300.51	2051.53	ABAKI_c10300	SufBD protein
	Scaffold1	1079457	1080194	-	C14	2066.63	2756.74	1455.67	985.666	ABAKI_c10310	ABC transport system ATP-binding protein
	Scaffold1	1080419	1081258	-	C6	1880.02	343.364	870.162	660.34	ABAKI_c10320	Molybdenum utilization protein ModD
	Scaffold1	1081275	1081493	-	C12	201.546	34.6064	138.457	57.4415	ABAKI_c10330	Uncharacterized protein
	Scaffold1	1081490	1082227	-	C6	1200.88	201.653	488.666	277.36	ABAKI_c10340	Molybdate/tungsten ABC transport system ATP-binding protein ModC1
	Scaffold1	1082221	1083045	-	C12	922.732	157.427	707.071	623.808	ABAKI_c10350	Molybdate/tungsten ABC transport system permease protein ModB1
	Scaffold1	1083055	1083852	-	C12	1714.93	241.055	1099.58	777.758	ABAKI_c10360	Molybdate/tungsten ABC transport system substrate binding protein ModA1
	Scaffold1	1084657	1085286	-	N/A	5530.4	9445.21	12164.3	4027.11	ABAKI_c10370	50S ribosomal protein L25
	Scaffold1	1085576	1085782	+	C6	216.442	50.2527	23.6596	50.2485	ABAKI_c10380	Uncharacterized protein
	Scaffold1	1085929	1086081	-	N/A	20.8316	7.34069	5.64024	5.39477	ABAKI_c10390	Uncharacterized protein
	Scaffold1	1086137	1086814	+	N/A	170.95	134.566	124.884	182.294	ABAKI_c10400	Multidrug resistance ABC transporter, ATP-binding and permease protein
	Scaffold1	1086811	1087878	+	N/A	175.422	144.899	128.493	187.749	ABAKI_c10410	Sensor histidine kinase
	Scaffold1	1087987	1088928	+	N/A	206.886	189.377	144.398	172.41	ABAKI_c10420	Putative ABC transport system ATP-binding protein
	Scaffold1	1088925	1089749	+	N/A	143.562	124.806	145.915	176.773	ABAKI_c10430	Transport permease protein
	Scaffold1	1090015	1090959	-	C6	6295.21	1350.78	1465.98	318.894	ABAKI_c10440	Putative RNA methylase
	Scaffold1	1091126	1091254	-	C6	518.268	95.0798	87.2481	23.1782	ABAKI_c10450	Uncharacterized protein
	Scaffold1	1091254	1091850	-	C6	3128.72	632.518	680.141	230.647	ABAKI_c10460	Uncharacterized protein
	Scaffold1	1092616	1093176	-	C6	4218.22	682.631	1188.84	524.921	ABAKI_c10470	RNA polymerase sigma factor
	Scaffold1	1093173	1093319	-	C6	848.013	140.452	156.046	57.3872	ABAKI_c10480	Uncharacterized protein
	Scaffold1	1093764	1093880	+	N/A	4.20998	5.35521	6.82194	7.59733	ABAKI_c10490	Transposase
	Scaffold1	1094073	1094624	-	C12	8705.62	1550.19	4653.76	3204.64	ABAKI_c10500	Putative AIP processing-secretion protein
	Scaffold1	1094945	1096222	-	C14	212.004	309.388	139.808	84.4878	ABAKI_c10510	Uncharacterized protein
	Scaffold1	1096222	1096944	-	C14	128.983	155.609	64.8052	47.2192	ABAKI_c10520	LytTR family transcriptional regulator
	Scaffold1	1097293	1099530	-	N/A	242.517	170.906	195.917	104.769	ABAKI_c10530	Chemotaxis protein CheA
	Scaffold1	1099549	1099899	-	N/A	29.3365	25.336	22.8261	19.2498	ABAKI_c10540	CheY
	Scaffold1	1099911	1100738	-	N/A	53.5554	44.8417	55.1536	23.7817	ABAKI_c10550	Chemotaxis protein methyltransferase 2
	Scaffold1	1100722	1102449	-	C14	128.721	146.465	117.33	49.8442	ABAKI_c10560	Uncharacterized protein
	Scaffold1	1102442	1103893	-	C8	130.718	122.22	128.177	61.4364	ABAKI_c10570	Uncharacterized protein
	Scaffold1	1103943	1104359	-	N/A	17.7936	15.4644	11.6637	8.97318	ABAKI_c10580	Two component, sigma54 specific, transcriptional regulator, Fis family
	Scaffold1	1104408	1105490	-	C3	63.2347	43.2756	22.5929	39.1031	ABAKI_c10590	Chemotaxis response regulator protein-glutamate methylesterase
	Scaffold1	1105572	1107047	-	C14	83.1103	112.67	51.4616	52.8494	ABAKI_c10600	Protein CheW
	Scaffold1	1107065	1109008	-	N/A	116.572	181.602	79.0624	92.7067	ABAKI_c10610	Methyl-accepting chemotaxis sensory transducer
	Scaffold1	1109326	1109685	-	N/A	8.67962	4.75399	4.12638	4.00081	ABAKI_c10620	Chemotaxis protein response regulator CheY6
	Scaffold1	1110301	1110819	+	N/A	305.788	377.607	506.005	299.241	ABAKI_c10630	Uncharacterized protein
	Scaffold1	1111805	1112113	-	C3	528.047	277.661	117.449	131.563	ABAKI_c10640	Putative pyridoxamine 5'-phosphate oxidase-like FMN-binding protein
	Scaffold1	1112252	1112608	+	C8	1023.4	489.019	323.611	84.7291	ABAKI_c10650	HxlR family transcriptional regulator
	Scaffold1	1112871	1112966	+	C10	67.6607	36.1022	99.1992	9.28693	ABAKI_c10660	Uncharacterized protein
	Scaffold1	1113232	1114467	+	N/A	702.937	480.505	548.103	743.954	ABAKI_c10670	Putative uncharacterized protein
	Scaffold1	1114721	1115821	-	C8	609.708	793.049	850.105	143.806	ABAKI_c10680	DNA helicase II / ATP-dependent DNA helicase PcrA
	Scaffold1	1115818	1117458	-	C8	1669.69	2069.47	1710.82	427.526	ABAKI_c10690	Putative ATP-dependent endonuclease of the OLD family
	Scaffold1	1117876	1119159	-	C8	587.804	761.366	775.705	184.207	ABAKI_c10700	Uncharacterized protein
	Scaffold1	1119852	1120817	-	C8	7030.46	7429.18	8954.15	1172.64	ABAKI_c10710	Uncharacterized protein
	Scaffold1	1120830	1121678	-	C8	3551.99	3858.7	4714.25	581.994	ABAKI_c10720	Uncharacterized protein
	Scaffold1	1122071	1122205	-	N/A	4.60065	2.76851	2.14623	1.33964	ABAKI_c10730	Uncharacterized protein
	Scaffold1	1122840	1123118	-	N/A	0.781332	1.20244	0.71541	2.67928	ABAKI_c10740	Uncharacterized protein
	Scaffold1	1123672	1124034	-	N/A	68.5707	104.699	75.7025	63.7295	ABAKI_c10750	Uncharacterized protein
	Scaffold1	1124446	1124826	-	C14	153.981	167.117	102.106	73.5113	ABAKI_c10760	Uncharacterized protein
	Scaffold1	1124838	1125191	-	C3	117.222	84.8591	31.2129	18.4955	ABAKI_c10770	Uncharacterized protein
	Scaffold1	1125380	1125568	-	C3	75.6416	32.1313	12.063	16.5886	ABAKI_c10780	Uncharacterized protein
	Scaffold1	1125627	1125983	-	N/A	380.26	392.344	485.575	252.016	ABAKI_c10790	Uncharacterized protein
	Scaffold1	1126015	1129377	-	N/A	1608.86	1298.19	2084.33	1206.45	ABAKI_c10800	Uncharacterized protein
	Scaffold1	1129546	1129821	+	N/A	0.781332	0	0	2.7336	ABAKI_c10810	Uncharacterized protein
	Scaffold1	1131612	1131965	-	C12	437.858	163.621	555.892	287.287	ABAKI_c10820	Uncharacterized protein
	Scaffold1	1131962	1132732	-	N/A	791.446	405.306	1178.2	765.612	ABAKI_c10830	Replicative DNA helicase
	Scaffold1	1132698	1134191	-	N/A	2498.69	1389.12	3335.45	2292.54	ABAKI_c10840	Uncharacterized protein
	Scaffold1	1134405	1134746	+	N/A	16.0149	13.6608	10.7982	25.9299	ABAKI_c10850	Uncharacterized protein
	Scaffold1	1134700	1135026	+	C9	4.20998	0.783037	15.0236	21.0843	ABAKI_c10860	Uncharacterized protein
	Scaffold1	1135384	1136601	-	N/A	66.445	35.8646	51.3115	27.6014	ABAKI_c10870	Cobalamin biosynthesis CobT VWA domain-containing protein
	Scaffold1	1136576	1137121	-	N/A	16.3619	10.4171	15.1066	14.3317	ABAKI_c10880	Uncharacterized protein
	Scaffold1	1137316	1137981	-	N/A	19.3999	5.77462	8.35177	4.05514	ABAKI_c10890	Uncharacterized protein
	Scaffold1	1137941	1139215	-	N/A	30.2488	18.2329	14.7745	27.8187	ABAKI_c10900	Uncharacterized protein
	Scaffold1	1139196	1139378	-	N/A	1.47532	0.60122	1.11464	0.881021	ABAKI_c10910	Uncharacterized protein
	Scaffold1	1139407	1140054	-	N/A	7.59496	6.50188	2.94468	4.07324	ABAKI_c10920	5-methyltetrahydrofolate--homocysteine methyltransferase
	Scaffold1	1140110	1140508	-	N/A	7.07328	3.36973	1.34778	5.81718	ABAKI_c10930	ATPase
	Scaffold1	1140512	1141036	-	N/A	4.55698	2.76851	6.35565	2.25688	ABAKI_c10940	ATPase associated with various cellular activities AAA_5
	Scaffold1	1142323	1142586	+	C3	529.823	599.786	208.874	215.688	ABAKI_c10950	Antitoxin
	Scaffold1	1143782	1144525	-	C9	125.251	92.9125	124.631	297.738	ABAKI_c10960	Uncharacterized protein
	Scaffold1	1144720	1145469	-	C5	51.1677	26.7203	52.4932	325.84	ABAKI_c10970	Putative permease
	Scaffold1	1145563	1145778	-	C9	22.7849	19.4911	12.7113	68.7802	ABAKI_c10980	Molybdenum cofactor biosynthesis protein C
	Scaffold1	1145854	1146813	-	C5	207.194	132.399	99.3621	926.838	ABAKI_c10990	Cyclic pyranopterin monophosphate synthase
	Scaffold1	1146873	1147904	-	C9	185.315	97.1211	87.3311	438.068	ABAKI_c11000	Uncharacterized protein
	Scaffold1	1147941	1148966	-	C9	180.588	110.069	111.572	615.975	ABAKI_c11010	Formylmethanofuran dehydrogenase subunit E region
	Scaffold1	1148963	1150066	-	C9	180.976	115.829	127.978	437.326	ABAKI_c11020	Putative molybdopterine-guanine dinucleotide biosynthesis protein MobA
	Scaffold1	1150083	1150919	-	C9	125.683	79.1257	68.5644	263.034	ABAKI_c11030	Uncharacterized protein
	Scaffold1	1151053	1151976	-	C9	136.62	83.6009	109.046	302.173	ABAKI_c11040	Uncharacterized protein
	Scaffold1	1152044	1153294	-	C5	216.779	118.123	118.461	685.631	ABAKI_c11050	Transcriptional regulator
	Scaffold1	1153312	1154484	-	C5	120.651	66.4298	136.595	795.506	ABAKI_c11060	Malic enzyme
	Scaffold1	1154530	1155780	-	C5	245.856	192.383	151.868	1024.77	ABAKI_c11070	Phosphoglycerate kinase
	Scaffold1	1155794	1156822	-	C5	280.315	156.21	132.287	1032.62	ABAKI_c11080	Glyceraldehyde-3-phosphate dehydrogenase, type II
	Scaffold1	1156842	1158221	-	C5	230.538	164.181	153.698	1142.79	ABAKI_c11090	Dihydrolipoyl dehydrogenase
	Scaffold1	1158235	1159578	-	C5	222.295	148.409	135.117	1138.73	ABAKI_c11100	Catalytic domain of components of various dehydrogenase complexes
	Scaffold1	1159590	1160573	-	C5	218.039	111.691	104.319	1364.23	ABAKI_c11110	TPP-dependent acetoin dehydrogenase complex, E1 protein subunit beta
	Scaffold1	1160587	1161552	-	C5	143.001	79.1402	94.252	1451.78	ABAKI_c11120	Pyruvate dehydrogenase
	Scaffold1	1161579	1162529	-	C5	175.332	77.6857	110.69	1510.41	ABAKI_c11130	3-hydroxyacyl-CoA dehydrogenase
	Scaffold1	1162583	1163431	-	C5	231.188	106.559	131.025	1419.24	ABAKI_c11140	Uncharacterized protein
	Scaffold1	1163525	1164412	-	C5	174.903	100.799	165.113	1501.56	ABAKI_c11150	Xanthine dehydrogenase
	Scaffold1	1164384	1164890	-	C5	148.82	79.2518	65.5526	587.336	ABAKI_c11160	Carbon monoxide dehydrogenase, small chain. Amino-end (CutC-2)
	Scaffold1	1164880	1167258	-	C5	1005.52	555.575	572.184	4045.79	ABAKI_c11170	Molybdenum hydroxylase family protein, large subunit
	Scaffold1	1167639	1168295	-	N/A	1129.98	1179.45	1732.57	1195.52	ABAKI_c11180	GntR domain protein
	Scaffold1	1168541	1168999	-	C11	37.7152	48.5605	14.9246	59.2339	ABAKI_c11190	Aerobic-type carbon monoxide dehydrogenase, small subunit CoxS/CutS-like protein
	Scaffold1	1168996	1169874	-	C11	54.5527	63.7316	19.6833	127.049	ABAKI_c11200	Aerobic-type carbon monoxide dehydrogenase, middle subunit CoxM/CutM-like protein
	Scaffold1	1169867	1172149	-	C11	172.124	188.761	39.8809	503.628	ABAKI_c11210	Molybdenum hydroxylase family protein, large subunit
	Scaffold1	1172164	1173192	-	C11	60.0221	86.9003	14.6244	167.781	ABAKI_c11220	Putative D-cysteine desulfhydrase
	Scaffold1	1173420	1174469	+	N/A	215.348	190.412	235.395	194.972	ABAKI_c11230	2-isopropylmalate synthase
	Scaffold1	1174632	1175144	-	C5	56.591	46.8829	54.8215	633.771	ABAKI_c11240	Uncharacterized protein
	Scaffold1	1175358	1177547	-	C11	44.4415	25.0984	19.8654	59.4209	ABAKI_c11250	Methyl-accepting chemotaxis sensory transducer
	Scaffold1	1178925	1179284	-	C4	17.2306	46.5193	72.3075	53.1813	ABAKI_c11260	Uncharacterized protein
	Scaffold1	1179395	1180240	-	N/A	90.8339	119.213	135.768	130.585	ABAKI_c11270	Uncharacterized protein
	Scaffold1	1180237	1180836	-	N/A	26.5169	33.0404	36.2879	23.9084	ABAKI_c11280	Uncharacterized protein
	Scaffold1	1181356	1182093	-	C3	197.039	211.428	97.2318	152.942	ABAKI_c11290	ATP-binding protein
	Scaffold1	1182086	1183657	-	N/A	66.4426	58.5582	52.1099	60.7727	ABAKI_c11300	Transposase
	Scaffold1	1184328	1185092	+	C3	404.574	495.198	84.7058	58.2261	ABAKI_c11310	Uncharacterized protein
	Scaffold1	1185119	1185445	+	C14	91.4429	124.624	32.7268	18.6825	ABAKI_c11320	Uncharacterized protein
	Scaffold1	1185740	1186465	-	C4	426.01	634.996	2211.88	2809.43	ABAKI_c11330	Uncharacterized protein
	Scaffold1	1186648	1186884	-	N/A	20.6569	25.8112	44.7738	44.5762	ABAKI_c11340	Uncharacterized protein
	Scaffold1	1187026	1187211	-	N/A	12.8896	11.4935	23.0592	16.8662	ABAKI_c11350	Uncharacterized protein
	Scaffold1	1187378	1187587	-	C14	7.24797	15.8838	3.89323	1.78015	ABAKI_c11360	Uncharacterized protein
	Scaffold1	1187592	1187981	-	N/A	2.69099	10.7104	5.00787	3.57841	ABAKI_c11370	Uncharacterized protein
	Scaffold1	1188105	1188404	-	N/A	0.390666	3.97095	4.3755	4.03703	ABAKI_c11380	Uncharacterized protein
	Scaffold1	1188454	1188867	-	N/A	13.7583	29.5446	11.4306	11.7068	ABAKI_c11390	Uncharacterized protein
	Scaffold1	1189013	1189246	+	N/A	75.3017	116.935	117.25	39.477	ABAKI_c11400	Phosphoribosylglycinamide formyltransferase
	Scaffold1	1189453	1189641	+	N/A	949.502	554.525	591.398	678.317	ABAKI_c11410	Toxin HicA
	Scaffold1	1189682	1190242	+	N/A	2106.13	1627.52	1190.96	1519.56	ABAKI_c11420	Uncharacterized protein
	Scaffold1	1190705	1193539	-	N/A	319.292	299.683	191.283	258.672	ABAKI_c11430	Peptidase M23B
	Scaffold1	1193596	1193997	-	C14	38.4528	60.837	22.0116	19.6722	ABAKI_c11440	Uncharacterized protein
	Scaffold1	1194037	1194381	-	N/A	20.9189	25.9373	11.2134	8.91886	ABAKI_c11450	Uncharacterized protein
	Scaffold1	1195029	1195274	+	C4	129.985	114.11	8533.79	7020.13	ABAKI_c11460	Uncharacterized protein
	Scaffold1	1195782	1196207	-	N/A	26.9075	21.6027	8.3358	7.56111	ABAKI_c11470	Uncharacterized protein
	Scaffold1	1196265	1196492	-	C3	14.8429	7.34069	1.66396	4.07324	ABAKI_c11480	Uncharacterized protein
	Scaffold1	1196519	1197295	-	C3	32.5492	35.8646	8.03559	11.1938	ABAKI_c11490	RNA polymerase sigma factor
	Scaffold1	1197325	1197735	-	N/A	4.55698	6.73947	1.34778	2.7155	ABAKI_c11500	Uncharacterized protein
	Scaffold1	1197804	1198040	-	N/A	3.90666	9.6898	2.29633	4.89994	ABAKI_c11510	Uncharacterized protein
	Scaffold1	1198037	1198321	-	C3	20.9189	35.1374	2.46241	7.13871	ABAKI_c11520	Uncharacterized protein
	Scaffold1	1198334	1198990	-	N/A	23.1319	21.9663	6.60477	6.2939	ABAKI_c11530	Uncharacterized protein
	Scaffold1	1199014	1199448	-	N/A	16.3619	21.3651	5.00787	7.59733	ABAKI_c11540	Uncharacterized protein
	Scaffold1	1199563	1199967	-	N/A	7.98563	8.48736	2.14623	1.79826	ABAKI_c11550	Uncharacterized protein
	Scaffold1	1199936	1200202	-	N/A	4.25366	1.20244	1.19768	0.458619	ABAKI_c11560	Uncharacterized protein
	Scaffold1	1200189	1201061	-	C3	28.4702	29.307	8.50188	9.87231	ABAKI_c11570	Uncharacterized protein
	Scaffold1	1201141	1201431	-	N/A	1.51899	2.95033	1.51386	4.88183	ABAKI_c11580	Uncharacterized protein
	Scaffold1	1201428	1201613	-	N/A	2.344	4.15277	4.12638	1.33964	ABAKI_c11590	Uncharacterized protein
	Scaffold1	1201789	1202820	+	C8	208.318	248.284	178.789	52.4691	ABAKI_c11600	Uncharacterized protein
	Scaffold1	1202824	1204209	+	N/A	798.248	872.373	951.738	746.741	ABAKI_c11610	Uncharacterized protein
	Scaffold1	1204762	1205607	-	N/A	953.297	704.779	561.874	459.092	ABAKI_c11620	Uncharacterized protein
	Scaffold1	1205604	1206203	-	C3	914.817	529.022	410.102	269.46	ABAKI_c11630	Uncharacterized protein
	Scaffold1	1207086	1207238	-	C10	96.8249	46.8127	67.1176	24.9764	ABAKI_c11640	Metal-binding protein
	Scaffold1	1207235	1207417	-	N/A	16.4906	9.45221	23.3594	11.6344	ABAKI_c11650	CGGC domain protein
	Scaffold1	1207715	1208014	-	C10	90.9673	37.8501	74.5048	25.8937	ABAKI_c11660	Predicted hydrolase
	Scaffold1	1208207	1208770	+	C3	687.002	339.589	219.436	173.55	ABAKI_c11670	Uncharacterized protein
	Scaffold1	1208871	1209233	-	C6	2775.49	660.414	663.651	523.914	ABAKI_c11680	Aminoglycoside adenylyltransferase
	Scaffold1	1209358	1209663	+	C3	2191.2	959.497	477.667	258.979	ABAKI_c11690	Pyridoxamine 5''-phosphate oxidase
	Scaffold1	1209757	1210557	+	C3	4255.13	2220.62	1018.43	633.463	ABAKI_c11700	Iron-sulfur flavoprotein
	Scaffold1	1211541	1213361	-	C8	1346.54	2229.93	2146.39	326.015	ABAKI_c11710	SEC-C domain protein
	Scaffold1	1213454	1215394	-	C8	1964.07	3518.51	2633.76	542.017	ABAKI_c11720	DNA helicase
	Scaffold1	1215379	1217454	-	C8	1604.48	2970	3205.04	1091.79	ABAKI_c11730	Uncharacterized protein
	Scaffold1	1218039	1219262	-	C8	209.18	434.361	520.096	69.9266	ABAKI_c11740	Uncharacterized protein
	Scaffold1	1219743	1220858	-	C8	491.753	743.705	959.642	206.54	ABAKI_c11750	Uncharacterized protein
	Scaffold1	1221779	1222729	-	N/A	373.575	575.345	784.53	133.155	ABAKI_c11760	Uncharacterized protein
	Scaffold1	1222893	1223135	-	N/A	8.24528	7.34069	1.747	2.23877	ABAKI_c11770	Uncharacterized protein
	Scaffold1	1223150	1223710	-	N/A	5.72898	6.73947	3.57705	4.97237	ABAKI_c11780	DNA polymerase IV
	Scaffold1	1224224	1225069	-	N/A	981.335	842.436	571.756	456.986	ABAKI_c11790	Uncharacterized protein
	Scaffold1	1225066	1225665	-	N/A	839.916	559.167	444.78	322.605	ABAKI_c11800	Uncharacterized protein
	Scaffold1	1226548	1226700	-	C12	110.627	43.2053	57.6671	29.4359	ABAKI_c11810	Metal-binding protein
	Scaffold1	1226697	1226879	-	N/A	19.3562	12.8777	18.9839	12.1292	ABAKI_c11820	CGGC domain protein
	Scaffold1	1227177	1227476	-	N/A	103.289	46.8127	61.4262	24.8678	ABAKI_c11830	Predicted hydrolase
	Scaffold1	1227669	1228232	+	C3	667.515	328.935	225.661	182.197	ABAKI_c11840	Uncharacterized protein
	Scaffold1	1228333	1228695	-	C6	2669.24	607.631	633.91	531.228	ABAKI_c11850	Aminoglycoside adenylyltransferase
	Scaffold1	1228820	1229125	+	C3	2306.21	951.877	487.593	234.099	ABAKI_c11860	Pyridoxamine 5''-phosphate oxidase
	Scaffold1	1229219	1230019	+	C3	4260.7	2143.02	1067.08	650.48	ABAKI_c11870	Iron-sulfur flavoprotein
	Scaffold1	1230684	1231751	-	C8	1792.34	2164.37	1941.68	213.461	ABAKI_c11880	Uncharacterized protein
	Scaffold1	1231753	1232205	-	C8	1044.19	1112.13	707.917	92.0911	ABAKI_c11890	Uncharacterized protein
	Scaffold1	1232983	1234266	-	C8	3120.93	3024.45	3014.97	492.135	ABAKI_c11900	DNA methylase N-4/N-6 domain protein
	Scaffold1	1234301	1234930	-	C8	1716.01	1699.44	1326.26	238.486	ABAKI_c11910	Uncharacterized protein
	Scaffold1	1234932	1236179	-	C8	2048.16	1803.3	2730.05	491.315	ABAKI_c11920	Uncharacterized protein
	Scaffold1	1236478	1237773	+	C12	233.015	222.431	319.379	468.32	ABAKI_c11930	Transposase DDE domain protein
	Scaffold1	1238166	1241141	-	C8	2310.15	3873.09	2030.39	938.056	ABAKI_c11940	Restriction endonuclease
	Scaffold1	1241157	1243082	-	C8	1181.16	1887.86	1436.08	609.223	ABAKI_c11950	Adenine specific DNA methylase Mod
	Scaffold1	1243079	1243807	-	C8	264.691	468.742	284.937	56.4518	ABAKI_c11960	Uncharacterized protein
	Scaffold1	1243808	1244542	-	C8	529.779	824.581	341.979	95.6273	ABAKI_c11970	Uncharacterized protein
	Scaffold1	1244569	1247835	-	C8	2193.53	2529.36	2407.72	1128.06	ABAKI_c11980	Putative helicase/DNA methylase hybrid protein
	Scaffold1	1247928	1248398	-	C8	194.992	184.79	445.777	64.3991	ABAKI_c11990	Uncharacterized protein
	Scaffold1	1248756	1249310	-	C8	418.546	301.026	155.614	67.7543	ABAKI_c12000	Putative recombinase
	Scaffold1	1249307	1249534	-	N/A	30.5958	26.7761	27.3357	7.52489	ABAKI_c12010	Uncharacterized protein
	Scaffold1	1249934	1250299	+	C4	1167.74	2021.3	6125.42	3558.83	ABAKI_c12020	Uncharacterized protein
	Scaffold1	1250554	1251048	-	N/A	383.002	362.646	488.2	340.805	ABAKI_c12030	Uncharacterized protein
	Scaffold1	1251336	1252697	-	N/A	2571.11	1407.66	1792.15	917.46	ABAKI_c12040	Uncharacterized protein
	Scaffold1	1252852	1253328	+	C4	498.438	728.226	1618.51	1046.47	ABAKI_c12050	Uncharacterized protein
	Scaffold1	1253442	1254695	-	C6	1221.48	508.313	140.188	548.487	ABAKI_c12060	DNA polymerase IV
	Scaffold1	1255499	1262059	-	C7	269.209	1191.38	384.67	702.323	ABAKI_c12070	Uncharacterized protein
	Scaffold1	1262215	1263000	-	N/A	462.907	373.914	529.301	439.982	ABAKI_c12080	Putative variant SH3 domain protein
	Scaffold1	1263139	1263252	-	N/A	1.12833	1.98548	1.43082	2.69739	ABAKI_c12090	Uncharacterized protein
	Scaffold1	1263252	1264262	-	C11	25.1265	32.8028	10.0157	39.7428	ABAKI_c12100	Uncharacterized protein
	Scaffold1	1264263	1264472	-	N/A	7.94196	4.99158	2.14623	5.37667	ABAKI_c12110	Uncharacterized protein
	Scaffold1	1264546	1265313	-	C11	35.1528	29.6706	7.1541	27.6376	ABAKI_c12120	Uncharacterized protein
	Scaffold1	1265316	1266356	-	C11	55.5937	37.0113	21.9286	58.8839	ABAKI_c12130	Uncharacterized protein
	Scaffold1	1266492	1266956	-	N/A	55.3754	39.1786	31.2449	38.6807	ABAKI_c12140	Uncharacterized protein
	Scaffold1	1266961	1267284	-	N/A	62.3637	41.6538	22.4109	21.8929	ABAKI_c12150	Uncharacterized protein
	Scaffold1	1267393	1267845	-	C3	111.971	75.8821	38.0668	53.5253	ABAKI_c12160	Uncharacterized protein
	Scaffold1	1267946	1268137	-	N/A	58.1561	36.6477	29.533	18.6463	ABAKI_c12170	Uncharacterized protein
	Scaffold1	1268142	1268561	-	C3	100.079	70.8905	38.5012	40.1168	ABAKI_c12180	Uncharacterized protein
	Scaffold1	1268539	1270089	-	C3	453.868	374.474	186.077	167.268	ABAKI_c12190	Uncharacterized protein
	Scaffold1	1270076	1271518	-	C3	372.539	294.328	140.591	165.15	ABAKI_c12200	Integrase
	Scaffold1	1271508	1272593	-	C3	311.435	257.499	141.571	168.125	ABAKI_c12210	Uncharacterized protein
	Scaffold1	1272855	1273943	-	C11	44.4415	52.0563	18.0513	52.5176	ABAKI_c12220	Serine/threonine protein kinase
	Scaffold1	1273956	1274927	-	C11	19.6596	21.9663	9.69955	39.453	ABAKI_c12230	Uncharacterized protein
	Scaffold1	1274914	1275972	-	N/A	17.7062	10.8365	3.89323	17.0653	ABAKI_c12240	Uncharacterized metalloprotease yebA
	Scaffold1	1275975	1278008	-	C11	36.3685	45.5544	12.229	88.3682	ABAKI_c12250	Uncharacterized protein
	Scaffold1	1278001	1278747	-	C11	10.9363	15.7723	2.54545	23.9084	ABAKI_c12260	Uncharacterized protein
	Scaffold1	1278872	1280584	-	C11	31.7678	44.1144	8.73502	63.8925	ABAKI_c12270	Uncharacterized protein
	Scaffold1	1280588	1280851	-	N/A	7.76727	4.15277	0.632369	4.54997	ABAKI_c12280	Uncharacterized protein
	Scaffold1	1280838	1281149	-	N/A	4.07897	2.76851	1.11464	4.53186	ABAKI_c12290	Uncharacterized protein
	Scaffold1	1281211	1281591	-	N/A	3.73197	9.50798	2.94468	4.09135	ABAKI_c12300	Type I restriction-modification system, specificity subunit S
	Scaffold1	1281615	1282586	-	N/A	8.33262	11.6753	4.45854	20.6256	ABAKI_c12310	Uncharacterized protein
	Scaffold1	1282629	1283768	-	N/A	29.2952	35.501	11.9959	28.8627	ABAKI_c12320	Uncharacterized protein
	Scaffold1	1284374	1288771	-	N/A	170.04	173.633	133.868	189.656	ABAKI_c12330	Cell wall/surface repeat protein
	Scaffold1	1288848	1289384	-	C12	1571.39	551.254	2232.96	2152.15	ABAKI_c12340	Uncharacterized protein
	Scaffold1	1289658	1290512	-	N/A	679.856	410.102	648.921	427.726	ABAKI_c12350	Uncharacterized protein
	Scaffold1	1290788	1291303	-	N/A	28.4265	15.2268	13.7429	17.9101	ABAKI_c12360	Uncharacterized protein
	Scaffold1	1291361	1291921	-	N/A	21.1349	10.4728	5.64024	12.0568	ABAKI_c12370	Uncharacterized protein
	Scaffold1	1291918	1292322	-	N/A	12.4989	7.94191	6.43869	15.3214	ABAKI_c12380	Uncharacterized protein
	Scaffold1	1292337	1293215	-	C11	16.6652	21.4208	5.15797	23.836	ABAKI_c12390	Uncharacterized protein
	Scaffold1	1293224	1294162	-	N/A	14.2339	19.016	4.44256	21.1386	ABAKI_c12400	Uncharacterized protein
	Scaffold1	1294159	1295493	-	N/A	25.1726	37.9617	10.5331	40.2195	ABAKI_c12410	Type II secretion system protein E
	Scaffold1	1295490	1296389	-	C11	19.7032	29.307	11.0473	40.5332	ABAKI_c12420	Uncharacterized protein
	Scaffold1	1296436	1297137	-	C11	14.1053	27.0136	5.17395	25.761	ABAKI_c12430	SAF domain containing protein
	Scaffold1	1297152	1297751	-	C11	12.9769	20.8196	11.1304	40.5695	ABAKI_c12440	Peptidase A24A prepilin type IV
	Scaffold1	1297756	1298076	-	C11	12.1956	28.9434	4.85777	35.3014	ABAKI_c12450	Uncharacterized protein
	Scaffold1	1298113	1298343	-	N/A	5.33831	8.54313	4.59267	15.7438	ABAKI_c12460	Uncharacterized protein
	Scaffold1	1298361	1299179	-	C11	13.6273	23.0427	3.89323	30.5161	ABAKI_c12470	Uncharacterized protein
	Scaffold1	1299244	1299480	-	N/A	2.99431	13.8983	2.61252	17.4877	ABAKI_c12480	Uncharacterized protein
	Scaffold1	1299597	1299833	-	N/A	3.42865	10.3468	1.43082	12.1835	ABAKI_c12490	Uncharacterized protein
	Scaffold1	1299879	1300124	-	N/A	0.737661	1.38426	1.34778	14.4042	ABAKI_c12500	Uncharacterized protein
	Scaffold1	1300170	1302110	-	C11	29.7732	79.196	13.7589	68.37	ABAKI_c12510	TRAG family protein
	Scaffold1	1302122	1302811	-	C11	26.3422	40.7447	5.24101	24.7351	ABAKI_c12520	Uncharacterized protein
	Scaffold1	1302969	1303979	-	C7	18.3589	57.4673	14.2252	36.7375	ABAKI_c12530	Uncharacterized protein
	Scaffold1	1304022	1304609	-	N/A	9.41728	33.0961	5.32405	19.7989	ABAKI_c12540	Uncharacterized protein
	Scaffold1	1304748	1305167	-	N/A	56.4648	32.8028	27.5018	17.4334	ABAKI_c12550	Single-stranded DNA-binding protein
	Scaffold1	1305245	1305787	-	N/A	22.4379	36.6477	11.1304	11.7068	ABAKI_c12560	Uncharacterized protein
	Scaffold1	1305812	1306159	-	N/A	5.29464	12.6401	6.03946	6.6982	ABAKI_c12570	Uncharacterized protein
	Scaffold1	1306429	1307229	-	C8	44.6574	75.8263	28.2683	7.1206	ABAKI_c12580	Uncharacterized protein
	Scaffold1	1307538	1308503	-	N/A	69.83	80.0348	37.9998	32.0427	ABAKI_c12590	TPR repeat-containing protein
	Scaffold1	1308555	1309430	-	N/A	4.20998	20.2742	5.64024	6.25769	ABAKI_c12600	ParB-like partition protein
	Scaffold1	1309510	1310376	-	C14	98.0818	110.195	65.3386	42.2047	ABAKI_c12610	Uncharacterized protein
	Scaffold1	1310378	1310746	-	N/A	35.3275	41.7653	49.0503	26.4066	ABAKI_c12620	Uncharacterized protein
	Scaffold1	1310892	1311794	-	N/A	17.8372	24.2596	31.7623	11.1395	ABAKI_c12630	ParB-like partition protein
	Scaffold1	1311804	1312622	-	N/A	25.6045	31.4185	24.9403	16.1481	ABAKI_c12640	Sporulation initiation inhibitor protein Soj1
	Scaffold1	1312788	1313744	-	N/A	15.6243	21.7845	6.98802	10.7352	ABAKI_c12650	DNA replication protein
	Scaffold1	1313741	1314022	-	N/A	1.172	10.8922	1.11464	4.05514	ABAKI_c12660	Uncharacterized protein
	Scaffold1	1314746	1314904	-	N/A	0.390666	0.783037	1.11464	2.66117	ABAKI_c12670	Uncharacterized protein
	Scaffold1	1314923	1315378	-	N/A	6.0323	11.0741	3.72715	3.59652	ABAKI_c12680	Uncharacterized protein
	Scaffold1	1315400	1315669	-	N/A	0.390666	0	0.316185	0.44051	ABAKI_c12690	Uncharacterized protein
	Scaffold1	1315761	1315970	-	N/A	1.51899	2.40488	2.54545	1.33964	ABAKI_c12700	Conserved domain protein
	Scaffold1	1316117	1316530	+	C8	1413.98	1058.34	776.171	290.472	ABAKI_c12710	Putative prophage LambdaCh01, repressor protein
	Scaffold1	1316788	1317891	+	C8	4222.76	3966.93	2957.2	652.953	ABAKI_c12720	Uncharacterized protein
	Scaffold1	1318674	1319009	-	C7	397.243	978.428	1784.07	1927.87	ABAKI_c12730	Na(+)-translocating NADH-quinone reductase subunit C
	Scaffold1	1319315	1320073	+	C4	585.276	1158.76	7919.38	9711.54	ABAKI_c12740	Uncharacterized protein
	Scaffold1	1320307	1321236	+	C7	2034.58	4148.15	3348.52	4764.87	ABAKI_c12750	Fructose-1,6-bisphosphate aldolase Fba1
	Scaffold1	1321379	1322356	+	N/A	1247	1332.45	1306.22	1077.08	ABAKI_c12760	Ribosomal large subunit pseudouridine synthase C
	Scaffold1	1322359	1322904	+	N/A	653.987	737.106	1059.38	997.008	ABAKI_c12770	Holliday junction resolvase RecU
	Scaffold1	1322901	1323380	+	N/A	1251.39	1911.42	2088.74	1884.69	ABAKI_c12780	S-ribosylhomocysteine lyase
	Scaffold1	1323569	1324396	-	N/A	2928.02	4257.62	3824.8	5207.86	ABAKI_c12790	Uncharacterized protein
	Scaffold1	1324440	1325210	-	N/A	3842.08	3454.3	2710.82	3980.08	ABAKI_c12800	Thymidylate synthase ThyX
	Scaffold1	1325419	1325952	+	C9	207.059	109.286	531.696	782.291	ABAKI_c12810	Uncharacterized protein
	Scaffold1	1326157	1326876	-	C12	928.59	618.101	1225.54	1270.57	ABAKI_c12820	Uncharacterized protein
	Scaffold1	1326882	1328177	-	C12	1144.75	561.88	1559.33	1522.41	ABAKI_c12830	Uncharacterized protein
	Scaffold1	1328179	1328493	-	C12	622.132	178.792	418.754	290.684	ABAKI_c12840	Uncharacterized protein
	Scaffold1	1329064	1329624	+	C7	468.886	1214.9	2128.57	2843.11	ABAKI_c12850	GTP cyclohydrolase 1
	Scaffold1	1329635	1330117	+	C7	731.191	1942.19	2099.95	2339.09	ABAKI_c12860	Uncharacterized protein
	Scaffold1	1330163	1330990	+	C7	1304.59	3119.4	5163.14	5274.86	ABAKI_c12870	Dihydropteroate synthase
	Scaffold1	1330972	1331796	+	C7	1654.78	3481.03	5246.44	5052.23	ABAKI_c12880	7,8-dihydroneopterin aldolase
	Scaffold1	1332032	1332616	-	N/A	961.21	1270.83	766.587	1532.74	ABAKI_c12890	Uncharacterized protein
	Scaffold1	1332638	1334089	-	C11	3435.95	4725.61	1845.37	3839.02	ABAKI_c12900	Proline--tRNA ligase
	Scaffold1	1334215	1334595	-	C7	3081.18	7388	10327.3	13720.9	ABAKI_c12910	50S ribosomal protein L7/L12
	Scaffold1	1334646	1335167	-	C7	8204.57	19530	14465.5	19424.8	ABAKI_c12920	50S ribosomal protein L10
	Scaffold1	1335393	1336082	-	C14	13380.2	29793.2	17301.2	13803.3	ABAKI_c12930	50S ribosomal protein L1
	Scaffold1	1336144	1336569	-	C14	7011.24	14543.4	8155.24	6307.34	ABAKI_c12940	50S ribosomal protein L11
	Scaffold1	1336640	1337176	-	N/A	6710.42	13309.2	10630.7	8781.13	ABAKI_c12950	Transcription termination/antitermination protein NusG
	Scaffold1	1337190	1337570	-	C14	10596.9	22592.3	9586.45	6395.07	ABAKI_c12960	Preprotein translocase subunit SecE
	Scaffold1	1337589	1337738	-	N/A	2819.38	4174.97	3193.99	2582.22	ABAKI_c12970	50S ribosomal protein L33
	Scaffold1	1337974	1338465	-	N/A	869.997	489.955	541.853	469.689	ABAKI_c12980	Phosphinothricin acetyltransferase
	Scaffold1	1338494	1338637	-	N/A	379.569	220.138	189.654	206.082	ABAKI_c12990	Uncharacterized protein
	Scaffold1	1339098	1339544	-	C6	4857.96	2238.34	877.233	2184.07	ABAKI_c13000	18 kDa heat shock protein Hsp
	Scaffold1	1340108	1340926	-	N/A	1090.72	622.829	967.975	1013.41	ABAKI_c13010	D-alanyl-D-alanine carboxypeptidase DacB2
	Scaffold1	1341298	1341519	-	N/A	31674.7	45254.8	29923.9	29675.8	ABAKI_c13020	Uncharacterized protein
	Scaffold1	1341520	1341942	-	N/A	11954.6	16850.4	20742.6	27790.3	ABAKI_c13030	Uncharacterized protein
	Scaffold1	1341946	1342143	-	N/A	19821.6	25553.7	21507.3	29135	ABAKI_c13040	RNA-binding protein
	Scaffold1	1342286	1344421	-	C7	28925.7	63552.2	74607.4	75126.5	ABAKI_c13050	CO dehydrogenase/acetyl-CoA synthase complex, beta subunit AcsB2
	Scaffold1	1344513	1345013	-	C7	8664.94	18451.4	17383	19009.3	ABAKI_c13060	Uncharacterized protein
	Scaffold1	1345199	1347373	-	C7	16164.1	77870.3	79249.8	149511	ABAKI_c13070	Acetyl CoA synthase catalytic subunit AcsB1
	Scaffold1	1347425	1348210	-	C7	6023.91	23501.8	19195.6	32052.3	ABAKI_c13080	CO dehydrogenase nickel-insertion accessory protein CooC2
	Scaffold1	1348236	1350134	-	C7	17064.5	77042.2	67432	105650	ABAKI_c13090	CO dehydrogenase, catalytic subunit AcsA
	Scaffold1	1350396	1351181	-	C7	4244.66	29629.3	33226.3	53334.1	ABAKI_c13100	Methyltetrahydrofolate:corrinoid/iron-sulfur protein methyltransferase AcsE
	Scaffold1	1351251	1352591	-	C7	4984.92	36951.9	60285	96990	ABAKI_c13110	Corrinoid/iron-sulfur protein, large subunit AcsC
	Scaffold1	1352611	1353546	-	C7	5860.3	37970.7	41515.1	65208.6	ABAKI_c13120	Corrinoid/iron-sulfur protein, small subunit AcsD
	Scaffold1	1353747	1354388	-	C4	733.535	1251.45	3777.95	2525.16	ABAKI_c13130	Uncharacterized protein
	Scaffold1	1354388	1355035	-	C7	1621.58	2667.99	5756.89	3283	ABAKI_c13140	Uncharacterized protein
	Scaffold1	1355050	1356975	-	C7	3793.17	7697.51	13838.5	11224.3	ABAKI_c13150	corrinoid activation/regeneration protein AcsV
	Scaffold1	1357054	1357839	-	C4	1932.82	3776.9	6948.77	9545.04	ABAKI_c13160	CO dehydrogenase nickel-insertion accessory protein CooC1
	Scaffold1	1358106	1359662	-	C9	6132.5	5371.46	8201.34	35334.5	ABAKI_c13170	Hydroxylamine reductase
	Scaffold1	1359750	1360094	-	C9	570.923	442.051	328.683	1445.6	ABAKI_c13180	Nitric oxide dioxygenase
	Scaffold1	1360158	1360979	-	C11	336.047	433.927	213.962	601.584	ABAKI_c13190	Iron-sulfur cluster-binding oxidoreductase
	Scaffold1	1361067	1361723	+	N/A	371.328	320.321	499.171	420.545	ABAKI_c13200	Crp/Fnr family transcriptional regulator
	Scaffold1	1361786	1363111	-	N/A	2096.38	2761.58	2166.21	2046.18	ABAKI_c13210	Uncharacterized protein
	Scaffold1	1363503	1364195	+	N/A	336.389	590.739	594.339	526.587	ABAKI_c13220	CRISPR-associated Cas5e family protein
	Scaffold1	1364207	1365967	+	C14	1276.45	2695.27	1755.22	1464.56	ABAKI_c13230	Uncharacterized protein
	Scaffold1	1365957	1366943	+	C14	1064.02	2338.26	1140.03	909.035	ABAKI_c13240	Uncharacterized protein
	Scaffold1	1366946	1367701	+	C7	578.336	1249.84	959.93	955.931	ABAKI_c13250	Uncharacterized protein
	Scaffold1	1367711	1370338	+	N/A	2267.73	3985.48	3143.53	2472.95	ABAKI_c13260	Uncharacterized protein
	Scaffold1	1370350	1370844	+	C8	295.376	466.827	382.719	204.138	ABAKI_c13270	CRISPR-associated protein Cas4
	Scaffold1	1370857	1371855	+	C10	624.25	1063.47	1237.03	590.666	ABAKI_c13280	CRISPR-associated endonuclease Cas1
	Scaffold1	1371859	1372143	+	C10	206.319	371.342	521.751	207.264	ABAKI_c13290	CRISPR-associated endoribonuclease Cas2
	Scaffold1	1372925	1373431	-	N/A	34.8495	24.9724	33.3751	30.6066	ABAKI_c13300	Uncharacterized protein
	Scaffold1	1374986	1375795	-	C4	161.273	213.622	345.651	415.983	ABAKI_c13310	MerR family transcriptional regulator
	Scaffold1	1375971	1376456	-	C12	957.475	545.031	1131.07	1674.01	ABAKI_c13320	Rubrerythrin
	Scaffold1	1376662	1377591	-	C6	322.718	92.3671	61.2442	139.516	ABAKI_c13330	Aldo/keto reductase
	Scaffold1	1377766	1379874	-	C6	547.391	191.125	159.326	353.611	ABAKI_c13340	Catalase
	Scaffold1	1379909	1380004	-	N/A	8.81063	3.55155	3.42695	6.23958	ABAKI_c13350	Uncharacterized protein
	Scaffold1	1380336	1381190	+	C3	516.324	383.381	245.845	293.991	ABAKI_c13360	Ribonuclease
	Scaffold1	1381440	1381883	-	C9	750.378	649.983	612.921	1358.93	ABAKI_c13370	Peptide methionine sulfoxide reductase MsrB
	Scaffold1	1381919	1383967	-	C11	2615.97	1876.94	1245.05	3194.4	ABAKI_c13380	Thymidylate kinase YyaL
	Scaffold1	1384052	1385731	-	N/A	994.198	1265.51	726.166	963.583	ABAKI_c13390	ABC transport system permease protein
	Scaffold1	1385731	1386453	-	N/A	476.449	525.274	400.24	441.659	ABAKI_c13400	ABC transport system ATP-binding protein
	Scaffold1	1386605	1387468	+	C12	5051.04	2758.81	6688.38	6588.71	ABAKI_c13410	Nitrite and sulphite reductase 4Fe-4S region
	Scaffold1	1387786	1388406	-	N/A	266.731	416.072	194.748	389.504	ABAKI_c13420	Uncharacterized protein
	Scaffold1	1388406	1389263	-	N/A	566.667	729.877	293.174	394.084	ABAKI_c13430	ABC transport system ATP-binding protein
	Scaffold1	1389267	1389641	-	N/A	185.235	184.875	98.3145	172.415	ABAKI_c13440	Transcriptional regulator GntR family
	Scaffold1	1390083	1390763	-	N/A	1572.29	1291.94	1303.4	978.693	ABAKI_c13450	Zinc metalloprotease
	Scaffold1	1390760	1391278	-	C3	1122.8	751.383	549.958	419.109	ABAKI_c13460	Methylated-DNA--protein-cysteine methyltransferase
	Scaffold1	1391250	1394753	-	C3	6846.21	4964.01	2973.17	1820.18	ABAKI_c13470	Exonuclease SbcC
	Scaffold1	1394750	1395970	-	C3	1602.15	887.573	595.7	633.035	ABAKI_c13480	DNA repair exonuclease subunit D
	Scaffold1	1396223	1396627	-	N/A	839.709	700.948	1170.4	1331.67	ABAKI_c13490	Uncharacterized protein
	Scaffold1	1396815	1398167	-	N/A	2078.25	1720.22	3349.59	3188.28	ABAKI_c13500	Na+/H+ antiporter NhaP
	Scaffold1	1398373	1399086	-	C3	776.848	685.246	282.574	284.644	ABAKI_c13510	Purine-nucleoside phosphorylase
	Scaffold1	1399407	1399832	+	N/A	564.507	808.011	727.23	764.749	ABAKI_c13520	Putative flavodoxin
	Scaffold1	1399933	1401228	-	C9	88.8392	56.8661	49.3473	114.467	ABAKI_c13530	Na+/H+ antiporter NhaP
	Scaffold1	1401333	1402559	-	N/A	876.5	1231.68	1642.78	1373.5	ABAKI_c13540	Peptidase U32
	Scaffold1	1402843	1403490	-	C7	632.728	1007.23	1876.54	1404.38	ABAKI_c13550	Caffeoyl-coA O-methyltransferase
	Scaffold1	1403511	1404623	-	N/A	1476.81	2417.05	2542.98	1737.73	ABAKI_c13560	Aminodeoxychorismate lyase PabC2
	Scaffold1	1404731	1405099	-	C7	3501.13	5355.73	7963.23	6366.82	ABAKI_c13570	UPF0342 protein AKG39_02300
	Scaffold1	1405293	1407032	-	N/A	16890.4	17401.7	18568.2	13061.5	ABAKI_c13580	Ribonuclease J
	Scaffold1	1407025	1407480	-	C10	4034.44	2932.67	4678.69	2126.85	ABAKI_c13590	Ferric uptake regulation protein Fur1
	Scaffold1	1407477	1408190	-	C4	3951.45	3047.08	6751.11	6397.4	ABAKI_c13600	Sugar fermentation stimulation protein homolog
	Scaffold1	1408177	1408467	-	C10	3814.3	3992.35	9666.94	4980.13	ABAKI_c13610	Uncharacterized protein
	Scaffold1	1408560	1408976	-	N/A	603.644	647.018	786.028	583.432	ABAKI_c13620	Putative pre-16S rRNA nuclease
	Scaffold1	1409005	1409943	-	N/A	2872.56	2207.17	3024.01	2526.09	ABAKI_c13630	Aldo/keto reductase
	Scaffold1	1410017	1410283	-	C4	14392.1	10098.2	30695.6	20795	ABAKI_c13640	UPF0297 protein AKG39_02265
	Scaffold1	1410381	1413020	-	N/A	3195.62	4857.38	3181.37	4272.13	ABAKI_c13650	Alanine--tRNA ligase
	Scaffold1	1413572	1414633	-	N/A	2347.52	1573.84	2029.89	1886.64	ABAKI_c13660	Uncharacterized protein
	Scaffold1	1414634	1415161	-	C6	1492.73	474.939	665.056	446.438	ABAKI_c13670	Uncharacterized protein
	Scaffold1	1415430	1416068	-	C12	2653.79	293.055	1699.03	614.522	ABAKI_c13680	Acetolactate decarboxylase
	Scaffold1	1416145	1416519	-	C12	7713.36	1167.4	11451	4683.7	ABAKI_c13690	FeS cluster assembly scaffold protein NifU
	Scaffold1	1416540	1417748	-	C12	23981.7	3798.65	23734.4	7631.94	ABAKI_c13700	Cysteine desulfurase IscS
	Scaffold1	1417752	1418174	-	C12	3757.79	712.582	4815.18	1663.87	ABAKI_c13710	Cysteine metabolism repressor
	Scaffold1	1418343	1420664	-	C7	25839.8	61159.9	54512.5	39927.4	ABAKI_c13720	4-hydroxy-3-methylbut-2-enyl diphosphate reductase
	Scaffold1	1420680	1421255	-	N/A	1061.16	697.37	680.058	467.637	ABAKI_c13730	1-acyl-sn-glycerol-3-phosphate acyltransferase
	Scaffold1	1421252	1421902	-	N/A	2234.52	1873.24	1381.98	997.955	ABAKI_c13740	Cytidylate kinase
	Scaffold1	1421943	1423139	-	N/A	1995.81	1795.74	2081.03	1351.55	ABAKI_c13750	Uncharacterized protein
	Scaffold1	1423175	1424110	-	N/A	1519.03	1372.33	1469.35	759.407	ABAKI_c13760	N-acetylmannosamine kinase
	Scaffold1	1424114	1424737	-	C3	2108.5	1886.2	1185.25	897.216	ABAKI_c13770	Efflux pump, RND superfamily, and rRNA methyltransferase, putative
	Scaffold1	1424685	1425083	-	N/A	988.91	1156.92	1180.74	912.405	ABAKI_c13780	Uncharacterized protein
	Scaffold1	1425077	1425790	-	N/A	2484.29	2504.42	2893.27	2479.03	ABAKI_c13790	Pseudouridine synthase
	Scaffold1	1425799	1426371	-	N/A	1232.6	1196.1	1182.41	879.162	ABAKI_c13800	Segregation and condensation protein B
	Scaffold1	1426364	1427098	-	N/A	940.468	949.819	1544.99	1242.89	ABAKI_c13810	Segregation and condensation protein A
	Scaffold1	1427103	1427744	-	N/A	1334.2	1389.24	1012.83	833.535	ABAKI_c13820	Peptidase
	Scaffold1	1427974	1428516	-	N/A	4516.93	4450.65	7679	5480.14	ABAKI_c13830	ADP-ribose pyrophosphatase NudF
	Scaffold1	1428516	1428917	-	C14	8554.53	9061.86	6273.36	4504.56	ABAKI_c13840	Transcriptional repressor NrdR
	Scaffold1	1428993	1430048	-	N/A	11484.6	8977.54	13633.3	11030.3	ABAKI_c13850	Cell division protein FtsZ
	Scaffold1	1430363	1431196	-	N/A	3470.64	3125.23	2798.49	1653.03	ABAKI_c13860	Division initiation protein FtsQ
	Scaffold1	1431199	1432299	-	N/A	6187.97	4715.26	4538.11	3953.52	ABAKI_c13870	UDP-N-acetylglucosamine--N-acetylmuramyl-(pentapeptide) pyrophosphoryl-undecaprenol N-acetylglucosamine transferase
	Scaffold1	1432316	1433410	-	N/A	4727.19	4089.01	3585.48	3059.91	ABAKI_c13880	Cell division protein FtsW
	Scaffold1	1433429	1434790	-	N/A	6144.98	5759.22	4384.62	3703.47	ABAKI_c13890	UDP-N-acetylmuramoylalanine--D-glutamate ligase
	Scaffold1	1434803	1435777	-	N/A	4085.08	3120.97	3707.6	4025.65	ABAKI_c13900	Phospho-N-acetylmuramoyl-pentapeptide-transferase
	Scaffold1	1435777	1437150	-	N/A	3974.01	3669.33	3403.21	3085.41	ABAKI_c13910	UDP-N-acetylmuramoyl-tripeptide--D-alanyl-D-alanine ligase
	Scaffold1	1437393	1439801	-	N/A	7595.9	7721.44	5564.38	8600.72	ABAKI_c13920	Penicillin-binding protein
	Scaffold1	1439854	1440237	-	N/A	4575.25	3323.8	3219.46	4088.41	ABAKI_c13930	Uncharacterized protein
	Scaffold1	1440249	1441214	-	N/A	8587.55	5275.75	5317.38	8457.07	ABAKI_c13940	Ribosomal RNA small subunit methyltransferase H
	Scaffold1	1441214	1441645	-	C12	5703.14	3251.45	3236.51	6769.5	ABAKI_c13950	Transcriptional regulator MraZ
	Scaffold1	1441920	1442189	+	N/A	366.162	424.839	609.663	617.581	ABAKI_c13960	UPF0237 protein Awo_c09540
	Scaffold1	1442198	1443556	+	N/A	3168.81	3478.75	3672.65	4516.1	ABAKI_c13970	UPF0210 protein Awo_c09530
	Scaffold1	1443759	1444199	+	C3	654.157	881.294	250.815	392.865	ABAKI_c13980	Formylmethanofuran dehydrogenase subunit E
	Scaffold1	1444490	1445572	+	N/A	1847.43	1633.98	2061.69	1540.01	ABAKI_c13990	Uncharacterized protein
	Scaffold1	1445715	1446656	-	N/A	112.447	99.8193	138.461	111.782	ABAKI_c14000	Uncharacterized protein
	Scaffold1	1446984	1448183	-	N/A	1005.95	1017.44	1391.19	797.322	ABAKI_c14010	Uncharacterized protein
	Scaffold1	1448268	1448990	-	N/A	655.513	600.598	679.7	502.945	ABAKI_c14020	NAD-dependent protein deacetylase
	Scaffold1	1449016	1449756	-	N/A	391.291	263.091	403.596	223.346	ABAKI_c14030	Uncharacterized protein
	Scaffold1	1449948	1450382	+	N/A	132.977	166.627	108.781	180.574	ABAKI_c14040	Response regulator in two-component regulatory system
	Scaffold1	1450425	1450838	+	N/A	61.4974	110.922	80.5443	129.951	ABAKI_c14050	Uncharacterized protein
	Scaffold1	1451144	1452058	+	N/A	26.9949	18.8342	15.4899	34.698	ABAKI_c14060	ABC transporter
	Scaffold1	1452051	1452902	+	C11	38.8848	29.1252	23.5095	68.3338	ABAKI_c14070	Transport permease protein
	Scaffold1	1453109	1453519	-	C4	1687.24	2324.53	18672.7	19030.1	ABAKI_c14080	ATP:cob(I)alamin adenosyltransferase
	Scaffold1	1453597	1453707	-	C4	3.86299	0.60122	26.023	25.1575	ABAKI_c14090	Response regulator
	Scaffold1	1453815	1453934	-	N/A	2.30032	2.5867	0.79845	2.66117	ABAKI_c14100	Glycerol uptake facilitator protein GlpF
	Scaffold1	1454131	1454499	+	N/A	52.1651	69.1984	75.8526	105.198	ABAKI_c14110	Transcriptional regulator, GntR family
	Scaffold1	1454496	1455350	+	N/A	198.731	339.783	171.005	273.221	ABAKI_c14120	Putative ABC transport system ATP-binding protein
	Scaffold1	1455355	1456140	+	C7	111.842	244.691	136.88	188.811	ABAKI_c14130	Uncharacterized protein
	Scaffold1	1456272	1457081	-	N/A	1392.96	1419.86	1303.43	888.369	ABAKI_c14140	Uncharacterized protein
	Scaffold1	1457108	1457833	-	C14	966.502	1142.62	928.982	510.227	ABAKI_c14150	Uncharacterized protein
	Scaffold1	1457836	1458354	-	C14	889.169	866.863	684.066	407.908	ABAKI_c14160	Uncharacterized protein
	Scaffold1	1458617	1459564	+	C3	641.233	262.798	356.932	252.456	ABAKI_c14170	Putative excinuclease ABC subunit C
	Scaffold1	1459556	1460428	-	N/A	79.6816	81.3778	82.1923	125.878	ABAKI_c14180	Membrane protein
	Scaffold1	1460592	1461476	+	N/A	128.117	145.989	248.404	220.19	ABAKI_c14190	Transcriptional regulator LysR family
	Scaffold1	1461605	1461748	-	C4	354.61	373.888	1615.28	1468.21	ABAKI_c14200	Uncharacterized protein
	Scaffold1	1461754	1463301	-	N/A	7700.26	6870.02	8658.38	10058.1	ABAKI_c14210	GMP synthase [glutamine-hydrolyzing]
	Scaffold1	1463313	1464770	-	N/A	6985.99	6049.54	7377.22	7466.76	ABAKI_c14220	Inosine-5'-monophosphate dehydrogenase
	Scaffold1	1464966	1466390	-	N/A	3630.49	3175.87	3765.68	2554.11	ABAKI_c14230	Pyruvate dehydrogenase E2 component, dihydrolipoyllysine-residue acetyltransferase PdhC3
	Scaffold1	1466399	1467406	-	N/A	2688.95	2102.94	2580.7	2116.66	ABAKI_c14240	Pyruvate dehydrogenase E1 component beta subunit PdhB3
	Scaffold1	1467417	1468379	-	N/A	1676.58	1311.18	1695.13	2280.87	ABAKI_c14250	Pyruvate dehydrogenase E1 component alpha subunit PdhA3
	Scaffold1	1468529	1469251	-	N/A	6798.4	5720.46	5487.57	4597.46	ABAKI_c14260	2-C-methyl-D-erythritol 4-phosphate cytidylyltransferase
	Scaffold1	1469263	1469724	-	C3	3315.67	2578.92	1623.05	1880.41	ABAKI_c14270	Putative ATP-binding protein
	Scaffold1	1469724	1470071	-	N/A	2139.08	1597.84	1791.72	1685.22	ABAKI_c14280	Transcriptional activator of the psp operon with PspB, phage shock protein
	Scaffold1	1470100	1471320	-	N/A	9030.74	5875.95	4804.56	5196.07	ABAKI_c14290	Putative aminotransferase
	Scaffold1	1471358	1471648	-	C3	1895.23	795.817	881.925	767.813	ABAKI_c14300	TrpR
	Scaffold1	1471792	1473189	+	N/A	3314.15	2693.19	2859.12	3197.92	ABAKI_c14310	Cysteine--tRNA ligase
	Scaffold1	1473174	1473620	+	N/A	1360.36	1024.26	1458.46	1234.63	ABAKI_c14320	Mini-ribonuclease 3
	Scaffold1	1473678	1475072	-	C4	2853.79	2841.1	5235.68	6388.78	ABAKI_c14330	Multidrug transporter MatE
	Scaffold1	1475106	1476782	-	N/A	9190.54	8939.81	10965.7	9059.34	ABAKI_c14340	Putative RNA helicase
	Scaffold1	1477062	1477490	+	N/A	13247	14375.8	22865	17111.9	ABAKI_c14350	SOS response transcriptional repressor, RecA-mediated autopeptidase
	Scaffold1	1477596	1479536	-	N/A	1072.49	815.757	1104.63	1422.74	ABAKI_c14360	Glutamine-dependent NAD(+) synthetase NadE
	Scaffold1	1479894	1481498	-	C7	3372.84	6972.81	10841.9	9639.48	ABAKI_c14370	CTP synthase
	Scaffold1	1481679	1482323	-	N/A	568.186	749.858	866.6	887.139	ABAKI_c14380	Hemolysin III-like protein
	Scaffold1	1482463	1483134	-	N/A	1354.73	1300.71	1586.31	948.949	ABAKI_c14390	Uncharacterized protein
	Scaffold1	1483334	1483909	+	N/A	1416.05	1626.87	2222.41	2339.78	ABAKI_c14400	5-formyltetrahydrofolate cyclo-ligase
	Scaffold1	1483916	1485217	+	N/A	5919.3	6419.36	9129.73	7786.81	ABAKI_c14410	Bifunctional dihydrofolate synthase /tetrahydrofolylpolyglutamate synthase FolC
	Scaffold1	1485258	1486232	-	N/A	1794.96	980.064	1065.4	1003.06	ABAKI_c14420	tRNA-dihydrouridine synthase
	Scaffold1	1486274	1487044	-	C3	3482.09	2420.54	1267.45	1334.42	ABAKI_c14430	Type III pantothenate kinase
	Scaffold1	1487110	1488045	-	C3	3795.88	2141.74	1431.09	1705.65	ABAKI_c14440	Formyltetrahydrofolate dehydrogenase
	Scaffold1	1488212	1490056	-	N/A	17071.8	17155.1	17951	23980.6	ABAKI_c14450	ATP-dependent zinc metalloprotease FtsH
	Scaffold1	1490085	1490621	-	N/A	4411.48	2629.32	2561.9	2982.23	ABAKI_c14460	Hypoxanthine-guanine phosphoribosyltransferase HprT
	Scaffold1	1490631	1491077	-	N/A	2340.74	1355.86	1252.79	1521.03	ABAKI_c14470	tRNA(Ile)-lysidine synthase
	Scaffold1	1491071	1492036	-	C9	1178.56	1363.78	942.175	2659.54	ABAKI_c14480	tRNA(Ile)-lysidine synthase
	Scaffold1	1492758	1493750	-	C3	2856.94	2351.12	1311.85	1438.44	ABAKI_c14490	Phosphatase Ppx/Gppa family
	Scaffold1	1493767	1494024	-	N/A	348.189	296.859	232.342	217.528	ABAKI_c14500	Uncharacterized protein
	Scaffold1	1494087	1494326	-	C3	793.011	393.995	181.219	168.028	ABAKI_c14510	Putative ribosome-associated heat shock protein
	Scaffold1	1494384	1494659	-	C4	4886.6	7786.84	15329.2	16669	ABAKI_c14520	DNA-binding protein HU
	Scaffold1	1494766	1496247	-	N/A	5348.04	5504.6	5051.8	2939.89	ABAKI_c14530	Uncharacterized protein
	Scaffold1	1496318	1497943	-	N/A	5026.05	4863.96	5306.63	4244.52	ABAKI_c14540	Stage V sporulation protein B
	Scaffold1	1498255	1499748	-	N/A	9590.72	18132.9	9274.98	18538.9	ABAKI_c14550	Peptidylprolyl isomerase
	Scaffold1	1499810	1503241	-	N/A	2490.09	3029.41	2458.66	2049.3	ABAKI_c14560	Transcription-repair-coupling factor
	Scaffold1	1503322	1503942	-	N/A	1636.94	2301.82	2974.59	2024.79	ABAKI_c14570	Peptidyl-tRNA hydrolase
	Scaffold1	1503958	1504917	-	N/A	1498.85	1940.92	2777.29	2298.96	ABAKI_c14580	Ribose-phosphate pyrophosphokinase
	Scaffold1	1504986	1506347	-	N/A	2233.81	2979.3	3101.66	2263.1	ABAKI_c14590	Bifunctional protein GlmU
	Scaffold1	1506420	1506749	-	C4	4831.17	4057.46	10509.2	6902.46	ABAKI_c14600	Stage V sporulation protein G
	Scaffold1	1506975	1507778	-	N/A	517.193	516.439	669.745	396.872	ABAKI_c14610	Pur operon repressor
	Scaffold1	1508040	1509458	+	N/A	3598.08	4484.13	3316.01	3894.03	ABAKI_c14620	UDP-N-acetylmuramate--L-alanine ligase
	Scaffold1	1509516	1509800	+	C4	1050.91	1711.9	3313.79	3500.35	ABAKI_c14630	Uncharacterized protein
	Scaffold1	1510019	1510786	+	C3	1246	1239.21	533.884	566.186	ABAKI_c14640	Prolipoprotein diacylglyceryl transferase Lgt2
	Scaffold1	1510849	1511703	+	C9	2399.02	2895.63	4234.11	7597.19	ABAKI_c14650	Uncharacterized protein
	Scaffold1	1511984	1513309	+	N/A	1235.45	960.544	940.329	1186.71	ABAKI_c14660	Uncharacterized protein
	Scaffold1	1513377	1513877	-	N/A	3621.42	2961.53	3865.94	3619.94	ABAKI_c14670	Protein translocase subunit SecA
	Scaffold1	1513969	1514295	-	C3	1527.85	706.723	753.907	638.84	ABAKI_c14680	Uncharacterized protein
	Scaffold1	1514654	1515724	+	N/A	1552.18	1543.08	1341.81	930.743	ABAKI_c14690	Histidine kinase (EC 2.7.13.3)
	Scaffold1	1515987	1516691	+	N/A	982.379	987.082	858.859	703.97	ABAKI_c14700	Uncharacterized transcriptional regulatory protein YrkP
	Scaffold1	1516651	1517748	+	N/A	1350.41	1182.27	1584.51	889.052	ABAKI_c14710	Histidine kinase
	Scaffold1	1518058	1518978	+	C9	707.979	869.086	1686.85	6830.36	ABAKI_c14720	Uncharacterized protein
	Scaffold1	1519001	1519708	+	C9	741.392	998.156	1474.35	4899.28	ABAKI_c14730	Putative ABC transport system ATP-binding protein
	Scaffold1	1519695	1520948	+	C9	1400.77	1590.88	3204.55	14035.1	ABAKI_c14740	Putative ABC transport system permease protein
	Scaffold1	1520954	1521649	-	N/A	155.415	217.076	180.606	196.994	ABAKI_c14750	DNA alkylation repair protein
	Scaffold1	1521990	1522544	-	N/A	1431.49	1559.77	1385.22	1709.7	ABAKI_c14760	Adenosylcobinamide-phosphate guanylyltransferase CobU
	Scaffold1	1522546	1523589	-	C3	1712.98	1739.98	759.816	952.938	ABAKI_c14770	Threonine-phosphate decarboxylase CobB
	Scaffold1	1523612	1524625	-	N/A	1098.48	1514.94	874.387	1144.12	ABAKI_c14780	Cobalamin biosynthesis protein CobD
	Scaffold1	1524631	1526124	-	N/A	3075.95	3957.14	2377.15	3289.06	ABAKI_c14790	Cobyric acid synthase
	Scaffold1	1526313	1527077	-	N/A	1863.33	2876.03	1223.52	1719.61	ABAKI_c14800	Precorrin-6A reductase CbiJ2
	Scaffold1	1527074	1527811	-	N/A	997.842	1531.89	869.216	1254.51	ABAKI_c14810	Precorrin-3B C(17)-methyltransferase CbiH
	Scaffold1	1527854	1528864	-	C14	3480.57	6030.15	1884.04	2803.66	ABAKI_c14820	Cobalamin biosynthesis protein CbiG
	Scaffold1	1528916	1529671	-	N/A	1710.64	2995.11	1157.02	1780.95	ABAKI_c14830	Precorrin-4 C(11)-methyltransferase CbiF
	Scaffold1	1529880	1530671	-	N/A	2214.46	3744.04	1364.34	2094.56	ABAKI_c14840	Sirohydrochlorin cobaltochelatase CbiK
	Scaffold1	1530697	1531986	-	N/A	3212.1	5134.89	1727.38	2550.58	ABAKI_c14850	Glutamate-1-semialdehyde 2,1-aminomutase
	Scaffold1	1532163	1533128	-	N/A	2296.62	4219.7	2173.84	3139.43	ABAKI_c14860	Delta-aminolevulinic acid dehydratase
	Scaffold1	1533327	1535744	-	N/A	4409.52	6257.25	3145.64	4347.03	ABAKI_c14870	Hydroxymethylbilane synthase
	Scaffold1	1535780	1536385	-	N/A	549.905	778.746	457.284	517.995	ABAKI_c14880	Uncharacterized protein
	Scaffold1	1536363	1537655	-	N/A	2284.51	3010.06	1314.62	1849.67	ABAKI_c14890	Glutamyl-tRNA reductase
	Scaffold1	1537630	1538472	-	N/A	947.194	973.635	755.61	832.268	ABAKI_c14900	Putative ABC transporter ATP-binding protein lmo1207
	Scaffold1	1538465	1539166	-	N/A	981.648	1038.68	563.973	810.146	ABAKI_c14910	Cobalt transport protein
	Scaffold1	1539367	1539672	-	C11	502.568	638.014	336.613	698.364	ABAKI_c14920	Cobalt transport protein CbiN
	Scaffold1	1539650	1540396	-	C11	1220.31	1233.33	543.833	1362.25	ABAKI_c14930	Cobalt transport protein CbiM
	Scaffold1	1540899	1541309	-	C3	1452.87	765.434	563.631	674.865	ABAKI_c14940	Zn-finger containing protein
	Scaffold1	1541344	1542030	-	C12	2492.42	879.154	1522.73	1581.38	ABAKI_c14950	Heat shock protein DnaJ domain protein
	Scaffold1	1542364	1543377	-	C7	50.1268	103.679	82.4573	149.225	ABAKI_c14960	Uncharacterized protein
	Scaffold1	1543371	1547111	-	N/A	141.701	273.382	245.976	437.079	ABAKI_c14970	Cobaltochelatase, CobN subunit
	Scaffold1	1547303	1548430	-	C7	126.899	380.109	199.622	395.555	ABAKI_c14980	Ferrichrome-binding periplasmic protein
	Scaffold1	1548475	1549104	-	N/A	19.6596	30.0343	22.0116	37.365	ABAKI_c14990	Precorrin-8X methylmutase CbiC1
	Scaffold1	1549212	1552652	-	C7	200.16	511.097	279.728	540.062	ABAKI_c15000	Aerobic cobaltochelatase subunit CobN3
	Scaffold1	1552662	1554731	-	N/A	148.602	310.631	144.312	285.989	ABAKI_c15010	Uncharacterized protein
	Scaffold1	1554718	1555773	-	C7	49.7361	122.29	86.2484	162.646	ABAKI_c15020	Magnesium chelatase
	Scaffold1	1555789	1556523	-	C7	57.2	166.865	73.09	157.896	ABAKI_c15030	Transport permease protein
	Scaffold1	1556523	1557362	-	N/A	68.442	149.051	72.9399	171.812	ABAKI_c15040	ABC-type Nod factor export system ATP binding protein NodI
	Scaffold1	1557431	1561174	-	C7	181.112	515.989	284.203	661.939	ABAKI_c15050	Aerobic cobaltochelatase subunit CobN2
	Scaffold1	1561162	1562265	-	C11	43.6165	84.0058	56.9166	148.078	ABAKI_c15060	Adenosylcobinamide amidohydrolase
	Scaffold1	1562286	1563506	-	C7	67.054	176.737	77.5325	176.977	ABAKI_c15070	Ferric enterobactin transport ATP-bindingprotein fepC
	Scaffold1	1563503	1564573	-	C11	37.9335	111.984	59.5642	162.977	ABAKI_c15080	Hemin permease
	Scaffold1	1564573	1565682	-	C7	70.1333	210.504	81.6398	146.727	ABAKI_c15090	Ferrichrome-binding periplasmic protein
	Scaffold1	1565716	1566933	-	C7	38.4528	126.317	75.3192	121.123	ABAKI_c15100	ABC-type cobalamin/Fe3+-siderophores transport systems, ATPase components
	Scaffold1	1567005	1568054	-	C7	28.6449	110.292	62.3908	108.016	ABAKI_c15110	Iron complex transport system permease protein
	Scaffold1	1568207	1568446	+	N/A	0.737661	0	0.316185	1.78015	ABAKI_c15120	Uncharacterized protein
	Scaffold1	1568472	1568786	-	C7	420.715	1356.19	620.238	788.095	ABAKI_c15130	Cobalt transport protein CbiN
	Scaffold1	1568786	1569538	-	C14	1345.14	3660.48	1841.22	2060.92	ABAKI_c15140	Cobalt transport protein CbiM
	Scaffold1	1569638	1570474	-	C14	1705.86	4106.29	2176.25	2483.99	ABAKI_c15150	Cobalt ABC transport system ATP-binding protein CbiO1
	Scaffold1	1570471	1571355	-	C7	2584.3	5905.25	3728.57	3845.41	ABAKI_c15160	Cobalt ABC transporter, inner membrane subunit CbiQ
	Scaffold1	1571553	1572314	-	C7	611.228	809.044	944.43	690.735	ABAKI_c15170	Precorrin-6A reductase CbiJ1
	Scaffold1	1573420	1574175	-	C7	4375.36	23504.4	47551.6	29280.6	ABAKI_c15180	Fe(3+)-citrate ABC transport system ATP-binding protein
	Scaffold1	1574162	1575241	-	C7	6358.68	24225.3	43559.5	36157.1	ABAKI_c15190	Fe(3+)-citrate ABC transport system periplasmic binding protein
	Scaffold1	1575248	1576336	-	C7	9882.27	56963.6	54441	39384.6	ABAKI_c15200	Fe(3+)-citrate ABC transport system periplasmic binding protein
	Scaffold1	1576404	1577216	-	C7	4782.92	25696.7	27142.9	18538.6	ABAKI_c15210	Release factor glutamine methyltransferase
	Scaffold1	1577306	1577830	-	C7	3467.29	17569.5	22195	14422.2	ABAKI_c15220	Formylmethanofuran dehydrogenase subunit E
	Scaffold1	1578090	1578941	-	N/A	63.4047	127.407	101.275	155	ABAKI_c15230	Peptidase S8 and S53 subtilisin kexin sedolisin
	Scaffold1	1579002	1579874	-	N/A	87.5386	208.938	91.2275	138.562	ABAKI_c15240	Uncharacterized protein
	Scaffold1	1579972	1580670	-	N/A	62.7567	140.62	70.0143	93.0988	ABAKI_c15250	Uncharacterized protein
	Scaffold1	1581263	1582588	-	C14	9200.65	24356.1	11273.7	7889.17	ABAKI_c15260	5-methylcytosine-specific restriction enzyme McrB
	Scaffold1	1582700	1583287	-	C7	12069	32094.5	24285	32204.5	ABAKI_c15270	Uncharacterized protein
	Scaffold1	1583297	1583833	-	C7	7445.3	16226.1	17646	22428.5	ABAKI_c15280	Uncharacterized protein
	Scaffold1	1584139	1585704	-	C7	13764	45860.9	36857.7	24600.7	ABAKI_c15290	Periplasmic dipeptide transport protein DppA
	Scaffold1	1585774	1586547	-	C8	4847.85	12064.7	9747.97	3420.19	ABAKI_c15300	ABC-type dipeptide/oligopeptide transport system, ATPase component (DppF/oppF)
	Scaffold1	1586566	1587336	-	C8	5097.95	9700.56	12729	3742.51	ABAKI_c15310	Oligopeptide transport system ATP-binding protein
	Scaffold1	1587338	1588111	-	C8	7062.06	11734.3	12183.9	4956.79	ABAKI_c15320	ABC-type dipeptide/oligopeptide/nickel transport system, permease component
	Scaffold1	1588056	1589084	-	C7	4627.02	10147.5	13255.9	5469.95	ABAKI_c15330	ABC-type dipeptide/oligopeptide/nickel transport system, permease component
	Scaffold1	1589255	1590025	-	C7	4544.1	12342.6	17300.8	5772.52	ABAKI_c15340	ABC transporter related protein
	Scaffold1	1590027	1591118	-	C7	6125.25	18665.6	19061.7	13863.7	ABAKI_c15350	Transport system permease protein
	Scaffold1	1591213	1592286	-	C7	10215.8	31994.6	21491.7	15367.2	ABAKI_c15360	ABC-type transporter, periplasmic subunit
	Scaffold1	1592307	1596143	-	C7	36171.4	83843.5	89217.6	67922.7	ABAKI_c15370	Cobaltochelatase CobN
	Scaffold1	1596174	1597220	-	C7	5824.28	11763.2	19710.6	14197.7	ABAKI_c15380	Magnesium chelatase
	Scaffold1	1597217	1599112	-	C7	18377.7	37431.2	42434.9	30219.2	ABAKI_c15390	Cobaltochelatase subunit
	Scaffold1	1599200	1599934	-	C7	6513.12	13181.5	14448.4	9674.81	ABAKI_c15400	Transport permease protein
	Scaffold1	1599934	1600773	-	C7	5158.48	7788.33	14187.3	9055.78	ABAKI_c15410	ABC transporter ATP-binding protein
	Scaffold1	1601546	1602907	-	C9	45.4388	71.4359	54.7544	145.725	ABAKI_c15420	Uncharacterized protein
	Scaffold1	1602984	1603754	-	C11	9.89529	17.9953	10.8302	58.5158	ABAKI_c15430	Oligopeptide ABC transport system ATP-binding protein OppF4
	Scaffold1	1603747	1604580	-	C11	29.0332	46.8272	18.0354	81.8751	ABAKI_c15440	Oligopeptide ABC transport system ATP-binding protein OppD4
	Scaffold1	1604577	1605461	-	C11	32.8525	45.4842	20.7149	103.762	ABAKI_c15450	Oligopeptide ABC transport system permease OppC4
	Scaffold1	1605463	1606392	-	C11	36.4995	77.2663	28.1022	130.446	ABAKI_c15460	Oligopeptide ABC transport system permease OppB4
	Scaffold1	1606427	1608022	-	C9	54.4217	111.327	51.6436	219.406	ABAKI_c15470	Oligopeptide ABC transport system substrate binding protein OppA4
	Scaffold1	1608680	1609627	-	N/A	84.0663	79.7972	98.1293	79.7509	ABAKI_c15480	Uncharacterized protein
	Scaffold1	1610106	1612103	-	N/A	653.463	530.658	763.019	505.944	ABAKI_c15490	Putative ABC transport system permease protein
	Scaffold1	1612096	1612863	-	N/A	301.149	246.829	276.372	200.192	ABAKI_c15500	Putative ABC transport system ATP-binding protein
	Scaffold1	1613060	1614076	-	N/A	338.039	318.071	447.361	284.855	ABAKI_c15510	Integral membrane sensor signal transduction histidine kinase
	Scaffold1	1614078	1614752	-	N/A	198.248	187.294	292.459	213.456	ABAKI_c15520	Uncharacterized protein
	Scaffold1	1615013	1615537	-	N/A	134.368	104.224	158.594	95.8931	ABAKI_c15530	Uncharacterized protein
	Scaffold1	1615634	1615915	-	N/A	55.3777	59.8722	83.2207	80.6622	ABAKI_c15540	Uncharacterized protein
	Scaffold1	1616106	1616819	-	N/A	319.42	286.219	338.43	305.131	ABAKI_c15550	Glutamine amidotransferase class-I
	Scaffold1	1616983	1618026	-	N/A	3941.74	3605.93	3902.7	3312.2	ABAKI_c15560	Uncharacterized protein
	Scaffold1	1618010	1621096	-	N/A	7695.54	5772.55	6912.24	5711.8	ABAKI_c15570	MCP methyltransferase/methylesterase, CheR/CheB with PAS/PAC sensor
	Scaffold1	1621502	1622080	-	N/A	1534.7	1303.65	1409.34	2102.36	ABAKI_c15580	Precorrin-6Y C(5,15)-methyltransferase (Decarboxylating)
	Scaffold1	1622073	1622699	-	N/A	1929.81	1762.52	1335.06	1837.46	ABAKI_c15590	Precorrin-6Y C(5)-methyltransferase CbiE
	Scaffold1	1622687	1623832	-	N/A	4414.34	5076.73	3147.43	4249.3	ABAKI_c15600	Cobalt-precorrin-5B C(1)-methyltransferase
	Scaffold1	1623847	1624587	-	N/A	1795.4	2211.78	1820.16	2447.03	ABAKI_c15610	Precorrin-2 C(20)-methyltransferase CbiL
	Scaffold1	1624581	1625210	-	N/A	1473.64	1625.6	1387.72	1551.19	ABAKI_c15620	Precorrin-8X methylmutase CbiC2
	Scaffold1	1625257	1626141	-	N/A	2391.02	2750.98	1836.8	2187.85	ABAKI_c15630	Putative kinase
	Scaffold1	1626138	1627502	-	N/A	3687.87	4369.79	3177.43	4392.88	ABAKI_c15640	Cobyrinate a,c-diamide synthase
	Scaffold1	1627541	1628824	-	N/A	2785.14	2971.78	2438.29	2788.89	ABAKI_c15650	Putative metal ABC transport system ATP-binding protein
	Scaffold1	1628826	1629857	-	N/A	864.821	911.76	987.901	1297.48	ABAKI_c15660	Putative metal ABC transport system permease protein
	Scaffold1	1629957	1630913	-	N/A	3522.61	4358.62	3556.72	6283.12	ABAKI_c15670	Putative metal ABC transport system substrate-binding protein
	Scaffold1	1631330	1632202	-	C9	154.891	173.493	141.306	513.577	ABAKI_c15680	Putative membrane protein
	Scaffold1	1632181	1633821	-	C9	183.623	277.227	296.735	1086.29	ABAKI_c15690	Cobalt ABC transport system ATP-binding protein CbiO5
	Scaffold1	1634059	1635009	-	C9	100.685	225.423	145.963	639.727	ABAKI_c15700	Cobalt ABC transport system permease protein CbiQ4
	Scaffold1	1635082	1636194	-	C9	159.972	174.877	146.579	614.026	ABAKI_c15710	Uncharacterized protein
	Scaffold1	1636246	1637193	-	C9	77.4686	90.675	89.0461	368.763	ABAKI_c15720	Putative membrane protein
	Scaffold1	1637190	1641023	-	C9	653.082	816.232	525.817	2410.52	ABAKI_c15730	Cell wall protein containing Ig-like domains (Group2 and 3)
	Scaffold1	1641132	1642919	-	C9	275.806	270.978	205.942	1137.14	ABAKI_c15740	Extracellular neutral metalloprotease, NPRE, fused to ChW-repeats
	Scaffold1	1643341	1644315	-	N/A	2452.4	2264.3	1767.77	2258.82	ABAKI_c15750	Uncharacterized protein
	Scaffold1	1644521	1646656	-	C9	194.78	340.777	244.692	1369.63	ABAKI_c15760	Uncharacterized protein
	Scaffold1	1646675	1647925	-	C9	102.729	165.243	104.169	575.267	ABAKI_c15770	Uncharacterized protein
	Scaffold1	1648614	1657427	-	C11	491.409	480.713	287.965	1095.08	ABAKI_c15780	Extracellular neutral metalloprotease, NPRE, fused to ChW-repeats
	Scaffold1	1658128	1658313	-	N/A	4.25366	11.0741	17.5691	16.1843	ABAKI_c15790	Uncharacterized protein
	Scaffold1	1658336	1664593	-	N/A	892.906	956.35	513.035	683.133	ABAKI_c15800	Extracellular neutral metalloprotease, NPRE, fused to ChW-repeats
	Scaffold1	1664676	1665500	-	C5	13.4113	16.5553	21.3633	199.787	ABAKI_c15810	Uncharacterized protein
	Scaffold1	1665863	1666555	-	C9	19.9629	24.7906	19.9165	86.5939	ABAKI_c15820	Uncharacterized protein
	Scaffold1	1667101	1668333	-	C9	55.0307	39.598	34.3588	96.7017	ABAKI_c15830	S-adenosylmethionine synthase
	Scaffold1	1668487	1669452	-	C12	32.0712	23.2245	28.6994	66.795	ABAKI_c15840	Putative two-component response regulator
	Scaffold1	1669455	1670744	-	C11	47.8701	28.5797	25.3715	64.2244	ABAKI_c15850	Uncharacterized protein
	Scaffold1	1670877	1671155	-	N/A	10.5456	4.75399	5.00787	17.5783	ABAKI_c15860	Predicted microcompartment shellprotein
	Scaffold1	1671189	1672106	-	C9	31.7242	23.6584	36.62	101.475	ABAKI_c15870	Glycyl-radical enzyme activating protein family
	Scaffold1	1672133	1674670	-	C9	93.4375	72.0784	93.856	219.17	ABAKI_c15880	Pyruvate formate-lyase
	Scaffold1	1675000	1679220	-	C9	140.007	126.792	101.725	386.619	ABAKI_c15890	Extracellular neutral metalloprotease, NPRE, fused to ChW-repeats
	Scaffold1	1679277	1679960	-	N/A	19.4873	23.1687	7.95255	26.9014	ABAKI_c15900	Uncharacterized protein
	Scaffold1	1680415	1681191	-	N/A	1556.36	1622.57	2492.92	2805.97	ABAKI_c15910	Xylose isomerase
	Scaffold1	1681214	1682167	-	N/A	1103.65	1118.88	1839.99	2044.84	ABAKI_c15920	Glycosyl transferase
	Scaffold1	1682160	1683284	-	N/A	2189.47	1785.56	2298.02	2740.6	ABAKI_c15930	Amino acid oxidase
	Scaffold1	1683281	1684420	-	N/A	2281.96	2108.73	3866.25	3792.31	ABAKI_c15940	Glutamine--scyllo-inositol transaminase
	Scaffold1	1684417	1685154	-	N/A	609.454	785.138	1163.74	978.012	ABAKI_c15950	Glycosyl transferase family 2
	Scaffold1	1685151	1686188	-	N/A	1232.25	1588.91	2410.18	1680.84	ABAKI_c15960	Methylthioribose-1-phosphate isomerase
	Scaffold1	1686191	1686946	-	N/A	876.85	1182.71	1649.49	1631.29	ABAKI_c15970	Methylthioadenosine phosphorylase MtaP
	Scaffold1	1687286	1688641	-	N/A	2032.19	2490.6	3654.78	4483.69	ABAKI_c15980	Uncharacterized protein
	Scaffold1	1688891	1689583	+	N/A	2793.21	2425.01	4421.6	3284.3	ABAKI_c15990	Nitrogen fixation protein NifU
	Scaffold1	1689595	1690596	+	N/A	5827.95	4788.31	7390.57	4936.19	ABAKI_c16000	GGGtGRT protein
	Scaffold1	1690835	1692361	+	N/A	14345.9	10502.9	13789	9026.95	ABAKI_c16010	Uncharacterized protein
	Scaffold1	1692349	1693128	+	N/A	1208.34	872.904	1810.5	1033.23	ABAKI_c16020	DNA replication protein
	Scaffold1	1693168	1693608	+	C12	338.299	207.372	563.066	494.008	ABAKI_c16030	Uncharacterized protein
	Scaffold1	1694148	1695626	-	C8	698.589	846.686	762.914	169.042	ABAKI_c16040	Uncharacterized protein
	Scaffold1	1695619	1696383	-	C8	449.35	478.643	595.397	86.316	ABAKI_c16050	Uncharacterized protein
	Scaffold1	1696625	1697749	-	C10	768.506	842.281	1400.06	383.137	ABAKI_c16060	Uncharacterized protein
	Scaffold1	1697740	1698258	-	N/A	419.982	410.102	618.919	362.505	ABAKI_c16070	Uncharacterized protein
	Scaffold1	1698661	1700184	-	N/A	728.197	810.179	546.95	500.229	ABAKI_c16080	Uncharacterized protein
	Scaffold1	1700408	1701688	-	N/A	218.031	249.011	258.966	130.868	ABAKI_c16090	Uncharacterized protein
	Scaffold1	1701867	1702520	-	N/A	218.951	147.122	159.939	127.531	ABAKI_c16100	Chloramphenicol O-acetyltransferase
	Scaffold1	1702742	1703428	+	N/A	109.152	112.166	179.957	188.087	ABAKI_c16110	Response regulator receiver
	Scaffold1	1703415	1704404	+	N/A	248.331	264.279	317.211	357.455	ABAKI_c16120	Sensor protein resE
	Scaffold1	1704487	1705170	+	N/A	149.64	187.28	195.668	179.796	ABAKI_c16130	Peptide ABC transporter ATP-binding protein
	Scaffold1	1705167	1707749	+	N/A	530.209	574.772	642.62	658.32	ABAKI_c16140	Putative ABC transport system permease protein
	Scaffold1	1707942	1708535	+	N/A	90.4019	136.285	129.741	91.6084	ABAKI_c16150	Uracil-DNA glycosylase
	Scaffold1	1708687	1709112	+	N/A	103.16	126.428	101.86	70.9769	ABAKI_c16160	Uncharacterized protein
	Scaffold1	1709427	1709873	+	C14	567.019	581.383	401.588	262.811	ABAKI_c16170	Uncharacterized protein
	Scaffold1	1709970	1710374	+	N/A	479.521	509.601	396.152	368.836	ABAKI_c16180	Uncharacterized protein
	Scaffold1	1710845	1711489	-	C8	1182.11	890.269	723.755	321.598	ABAKI_c16190	Uncharacterized protein
	Scaffold1	1711845	1712261	-	C8	1516.26	1364.83	765.722	329.931	ABAKI_c16200	FAD synthase
	Scaffold1	1712635	1713279	-	C8	481.562	578.797	442.053	247.846	ABAKI_c16210	Alpha/beta hydrolase
	Scaffold1	1713561	1714310	-	N/A	351.055	310.505	238.136	187.157	ABAKI_c16220	GCN5 family acetyltransferase
	Scaffold1	1714643	1715140	+	N/A	3.86299	2.5867	1.03159	10.8439	ABAKI_c16230	Putative ABC transport system ATP-binding protein
	Scaffold1	1715320	1715607	+	N/A	0.781332	2.95033	2.06319	5.43099	ABAKI_c16240	Transcriptional regulator MerR family
	Scaffold1	1715709	1716347	-	N/A	752.988	965.37	739.96	598.482	ABAKI_c16250	Lin2189 protein
	Scaffold1	1716658	1717197	-	C14	509.117	743.637	534.025	321.707	ABAKI_c16260	Putative CDP-alcohol phosphatidyltransferase
	Scaffold1	1717194	1717403	-	C8	326.496	456.327	253.929	149.955	ABAKI_c16270	Uncharacterized protein
	Scaffold1	1717454	1718548	-	C14	1407.28	2092.16	1549.35	1018.54	ABAKI_c16280	UDP-galactopyranose mutase Glf
	Scaffold1	1718738	1719790	-	N/A	1153.3	1706.35	1282.15	1104.14	ABAKI_c16290	Putative lysylphosphatidylglycerol synthetase
	Scaffold1	1719817	1720857	-	N/A	1789.24	2330.88	2082.23	2046.21	ABAKI_c16300	Glycosyltransferase
	Scaffold1	1721481	1722293	+	N/A	601.608	692.81	915.916	719.61	ABAKI_c16310	Formamidopyrimidine-DNA glycosylase
	Scaffold1	1722384	1723055	-	N/A	4.46964	5.77462	13.2606	12.1473	ABAKI_c16320	Uncharacterized protein
	Scaffold1	1723049	1723915	-	N/A	16.4056	21.7287	28.9166	18.6463	ABAKI_c16330	ABC transporter related protein
	Scaffold1	1724462	1724743	+	N/A	16.7526	20.2184	29.3989	51.4374	ABAKI_c16340	Uncharacterized protein
	Scaffold1	1724958	1725218	-	C8	191.391	111.145	199.404	40.9013	ABAKI_c16350	AraC family transcriptional regulator
	Scaffold1	1725442	1726191	+	C11	26.4295	66.0662	20.6638	61.5451	ABAKI_c16360	Lantibiotic ABC transporter ATP-binding protein
	Scaffold1	1726191	1726952	+	C4	24.2602	44.9532	61.9915	94.4629	ABAKI_c16370	Permease
	Scaffold1	1726949	1727671	+	C4	60.6287	78.1196	125.133	174.594	ABAKI_c16380	Permease
	Scaffold1	1727689	1728363	+	N/A	154.501	97.0095	108.867	70.0899	ABAKI_c16390	Response regulator receiver
	Scaffold1	1728339	1729670	+	N/A	381.92	457.908	420.737	488.801	ABAKI_c16400	Histidine kinase (EC 2.7.13.3)
	Scaffold1	1729692	1730240	-	C8	508.642	511.586	517.404	234.407	ABAKI_c16410	Uncharacterized protein
	Scaffold1	1730587	1731174	-	C8	207.532	205.513	202.851	42.0115	ABAKI_c16420	Uncharacterized protein
	Scaffold1	1731336	1732505	+	C3	467.192	901.537	86.3985	64.8881	ABAKI_c16430	Uncharacterized protein
	Scaffold1	1732521	1732652	+	C14	24.3476	54.0418	12.5612	4.91805	ABAKI_c16440	Uncharacterized protein
	Scaffold1	1732782	1733411	+	C3	151.989	240.72	44.3394	48.9029	ABAKI_c16450	5-methyltetrahydrofolate--homocysteine S-methyltransferase
	Scaffold1	1733419	1734219	+	C3	224.94	425.273	59.7143	64.6286	ABAKI_c16460	Methyltransferase 2 MttA4
	Scaffold1	1734391	1734618	-	N/A	31.3772	23.8257	40.015	17.0653	ABAKI_c16470	Ketopantoate reductase Kpr
	Scaffold1	1734746	1735039	-	N/A	3.42865	2.16729	1.99613	6.75252	ABAKI_c16480	Uncharacterized protein
	Scaffold1	1735311	1736168	-	N/A	741.912	626.353	1381.03	1135.54	ABAKI_c16490	Transcriptional regulator AraC family
	Scaffold1	1736377	1736517	-	C4	46.1764	18.2329	103.936	50.5925	ABAKI_c16500	Uncharacterized protein
	Scaffold1	1736631	1739519	-	C10	758.281	235.714	848.294	317.127	ABAKI_c16510	Putative ABC transport system permease protein
	Scaffold1	1739528	1740226	-	C10	162.879	60.4879	146.496	49.2348	ABAKI_c16520	Putative ABC transport system ATP-binding protein
	Scaffold1	1740403	1741023	-	C10	201.114	103.819	579.594	193.838	ABAKI_c16530	Transcriptional regulator, TetR family
	Scaffold1	1741244	1741750	+	C11	7.11695	4.33459	1.43082	14.4585	ABAKI_c16540	Putative ABC transport system ATP-binding protein
	Scaffold1	1741747	1742217	+	C11	13.2803	6.73947	3.66009	20.3481	ABAKI_c16550	Transcriptional regulator MerR family
	Scaffold1	1742334	1742978	-	N/A	260.01	288.301	377.548	424.824	ABAKI_c16560	Uncharacterized protein
	Scaffold1	1743431	1743904	-	N/A	137.879	128.12	123.255	70.0053	ABAKI_c16570	MarR family transcriptional regulator
	Scaffold1	1744047	1744949	+	N/A	27.1235	17.3941	14.7745	24.8075	ABAKI_c16580	Uncharacterized protein
	Scaffold1	1744946	1746430	+	N/A	38.5838	27.9227	20.3477	46.0367	ABAKI_c16590	Drug resistance transporter, EmrB/QacA subfamily
	Scaffold1	1746469	1746759	-	N/A	13.0206	16.2475	28.3673	26.5153	ABAKI_c16600	Uncharacterized protein
	Scaffold1	1746789	1748096	-	N/A	144.651	202.436	234.309	247.146	ABAKI_c16610	Major facilitator superfamily MFS_1
	Scaffold1	1748099	1749355	-	N/A	234.925	252.185	236.625	229.954	ABAKI_c16620	Major facilitator superfamily MFS_1 transporter
	Scaffold1	1749402	1751342	-	N/A	335.435	411.289	389.739	341.005	ABAKI_c16630	Chemotaxis protein histidine kinase CheA5
	Scaffold1	1751365	1751724	-	N/A	34.2428	59.8867	46.6198	44.9202	ABAKI_c16640	Chemotaxis protein response regulator CheY5
	Scaffold1	1751771	1752682	-	N/A	150.987	189.503	151.887	123.518	ABAKI_c16650	Uncharacterized protein
	Scaffold1	1753236	1753904	+	C4	174.206	242.621	576.259	399.509	ABAKI_c16660	Rubredoxin-type Fe(Cys)4 protein
	Scaffold1	1753910	1754419	+	C7	70.2207	133.601	206.792	190.404	ABAKI_c16670	4Fe-4S ferredoxin
	Scaffold1	1754549	1754938	-	N/A	128.94	97.7223	148.393	195.606	ABAKI_c16680	Uncharacterized protein
	Scaffold1	1755096	1755431	+	C10	67.1803	121.618	174.065	56.3554	ABAKI_c16690	Transcriptional regulator, effector-binding domain/component
	Scaffold1	1755435	1755845	+	C10	109.193	167.102	216.114	79.7509	ABAKI_c16700	Creatininase CrnA
	Scaffold1	1755952	1756317	+	C7	105.808	214.95	211.132	109.199	ABAKI_c16710	Uncharacterized protein
	Scaffold1	1756413	1756964	+	C7	156.41	268.558	362.109	203.571	ABAKI_c16720	Isochorismatase family protein
	Scaffold1	1757135	1757875	+	N/A	436.121	545.143	685.883	396.733	ABAKI_c16730	AraC family transcriptional regulator
	Scaffold1	1757980	1758372	+	N/A	151.467	177.17	249.084	151.73	ABAKI_c16740	Cupin
	Scaffold1	1758377	1759930	-	C11	41.0128	45.6102	10.3159	64.7133	ABAKI_c16750	2-isopropylmalate synthase LeuA1
	Scaffold1	1760440	1761903	-	N/A	173.122	289.043	314.023	401.084	ABAKI_c16760	Drug resistance transporter, EmrB/QacA family
	Scaffold1	1761903	1762346	-	N/A	44.0071	68.1365	84.6706	75.8768	ABAKI_c16770	MarR family transcriptional regulator
	Scaffold1	1762507	1762833	+	C3	216.736	106.518	91.2403	107.196	ABAKI_c16780	Transcriptional regulator PadR family
	Scaffold1	1762826	1763419	+	N/A	319.767	190.23	219.471	232.76	ABAKI_c16790	Uncharacterized protein
	Scaffold1	1763420	1764370	+	N/A	609.546	398.664	363.757	354.945	ABAKI_c16800	Uncharacterized protein
	Scaffold1	1764596	1765810	-	N/A	18762.5	18448.7	10460	19182.9	ABAKI_c16810	Iron-sulfur cluster carrier protein
	Scaffold1	1765882	1766373	-	C3	5213.71	3583.16	2376.1	2131.22	ABAKI_c16820	Flavin oxidoreductase
	Scaffold1	1766509	1767378	-	N/A	9677.28	5454.5	6333.42	5731.4	ABAKI_c16830	ATPase
	Scaffold1	1767356	1768213	-	N/A	7959.39	4937.18	6270	5103.29	ABAKI_c16840	Heterodisulfide reductase, alpha subunit
	Scaffold1	1768210	1768512	-	C3	3523.29	2290.82	1670.36	2244.23	ABAKI_c16850	Uncharacterized protein
	Scaffold1	1768516	1768884	-	N/A	2654.71	1582.7	1723.92	1415.12	ABAKI_c16860	Dinitrogenase iron-molybdenum cofactor biosynthesis protein
	Scaffold1	1768895	1769281	-	N/A	3406.54	1996.79	2874.78	2377.08	ABAKI_c16870	UPF0251 protein CA_C3166
	Scaffold1	1769518	1769892	+	N/A	1442.51	2176.78	2796.78	1939.76	ABAKI_c16880	Uncharacterized protein
	Scaffold1	1770019	1771074	-	C4	1377.54	2269.99	5317.41	4765.17	ABAKI_c16890	Methyl-accepting chemotaxis sensory transducer, class 36H, CHASE3 and Hist_Kin_Sens domain-containing
	Scaffold1	1771295	1773061	-	N/A	4144.56	3062.81	6723.16	4271.37	ABAKI_c16900	Protein NorD
	Scaffold1	1773094	1774017	-	C4	1085.38	972.151	2197.97	1873.06	ABAKI_c16910	ATPase associated with various cellular activities AAA_5
	Scaffold1	1774339	1775277	-	N/A	4565.18	4476.67	4057.91	4277.4	ABAKI_c16920	Transketolase subunit B
	Scaffold1	1775280	1776089	-	N/A	3326.64	3806	3006.11	3945.6	ABAKI_c16930	Transketolase subunit A
	Scaffold1	1776292	1777479	-	N/A	6658.76	5407.16	6007.61	5102.61	ABAKI_c16940	Alanine racemase
	Scaffold1	1777481	1778170	-	N/A	2091.22	1543.04	2131.37	1482.88	ABAKI_c16950	5'-methylthioadenosine/S-adenosylhomocysteine nucleosidase 1
	Scaffold1	1778167	1778655	-	N/A	1707.17	1139.24	1680.78	1259.57	ABAKI_c16960	2-C-methyl-D-erythritol 2,4-cyclodiphosphate synthase
	Scaffold1	1778838	1779152	-	C12	991.866	341.994	725.103	571.357	ABAKI_c16970	Bh protein
	Scaffold1	1779287	1780024	-	N/A	2318.3	2927.58	3887.24	2903.28	ABAKI_c16980	UBA/THIF-type NAD/FAD binding protein
	Scaffold1	1780028	1781704	-	N/A	2650.56	3179.53	4585.89	3824.49	ABAKI_c16990	Arginine--tRNA ligase
	Scaffold1	1781803	1782234	-	N/A	1553.18	1922.55	2976.68	2578.54	ABAKI_c17000	Uncharacterized protein
	Scaffold1	1782323	1783378	-	N/A	1605.99	2390.5	3087.94	2409.97	ABAKI_c17010	D-alanine--D-alanine ligase
	Scaffold1	1783422	1783913	-	N/A	973.357	1392.91	1464.31	998.431	ABAKI_c17020	D-alanine--D-alanine ligase
	Scaffold1	1783910	1784338	-	C8	970.639	1328.64	959.208	588.187	ABAKI_c17030	Putative acetyltransferase epsM
	Scaffold1	1784347	1785747	-	N/A	1843.45	2235.08	2617.46	2293.72	ABAKI_c17040	Ribosomal RNA small subunit methyltransferase F
	Scaffold1	1786285	1787397	-	C9	4405.02	4286.48	6333.06	13065	ABAKI_c17050	Twitching motility protein PilT
	Scaffold1	1787483	1787968	-	N/A	2227.52	2292.96	2856.59	2761.62	ABAKI_c17060	Transcriptional regulator CarD family
	Scaffold1	1788070	1790205	-	N/A	2130.4	2920.21	2763.31	3869.55	ABAKI_c17070	Transcriptional accessory protein Tex
	Scaffold1	1790425	1791315	+	N/A	878.587	906.657	1291.05	1715.35	ABAKI_c17080	Sporulation protein
	Scaffold1	1791414	1792100	-	N/A	2494.58	3523.73	2263.4	3104.94	ABAKI_c17090	Uncharacterized protein
	Scaffold1	1792122	1794044	-	N/A	4989.41	7563.7	5112.88	7872.29	ABAKI_c17100	Aconitase AcnA
	Scaffold1	1794417	1795265	+	N/A	497.087	461.193	349.484	398.839	ABAKI_c17110	tRNA-processing ribonuclease BN
	Scaffold1	1795258	1796094	+	N/A	273.285	301.836	359.998	316.27	ABAKI_c17120	tRNA-processing ribonuclease BN
	Scaffold1	1796272	1798176	+	N/A	3661.77	3420.31	5914.78	5964.53	ABAKI_c17130	1,4-alpha-glucan branching enzyme GlgB
	Scaffold1	1798210	1800636	+	N/A	4444.19	4611.76	5736.65	4994.61	ABAKI_c17140	Alpha-1,4 glucan phosphorylase
	Scaffold1	1800649	1801773	+	N/A	1950.07	2004.58	2175.57	1895.74	ABAKI_c17150	Glucose-1-phosphate adenylyltransferase
	Scaffold1	1801789	1802901	+	N/A	1954.89	2413.35	1997.49	1975.56	ABAKI_c17160	Glycogen biosynthesis protein GlgD
	Scaffold1	1802903	1804321	+	N/A	2966.72	3759.23	3889.68	4004.12	ABAKI_c17170	Glycogen synthase
	Scaffold1	1804326	1806212	+	N/A	3587.57	4247.86	5458.9	5225.67	ABAKI_c17180	4-alpha-glucanotransferase
	Scaffold1	1812588	1813163	-	C5	8739.61	2103.16	2755.5	10514	ABAKI_c17190	Riboflavin transporter
	Scaffold1	1813440	1814369	-	N/A	1482.53	2868.96	2478.76	2001.38	ABAKI_c17200	Magnesium and cobalt transporter CorA1
	Scaffold1	1814385	1814474	-	N/A	10.6329	15.2826	23.3594	18.055	ABAKI_c17210	Uncharacterized protein
	Scaffold1	1814965	1816386	+	N/A	1715.76	1688.01	2162.08	2085.79	ABAKI_c17220	Glutamate decarboxylase
	Scaffold1	1816499	1818007	-	N/A	1149.35	1283.03	1613.36	1938.78	ABAKI_c17230	Uncharacterized protein
	Scaffold1	1818316	1820235	-	C13	13478.3	51608.7	15039.4	10430.6	ABAKI_c17240	Fructose-specific PTS system II components ABC
	Scaffold1	1820524	1821441	-	C14	7023.87	16648.9	5958.17	3552.36	ABAKI_c17250	Tagatose-6-phosphate kinase
	Scaffold1	1821438	1822190	-	C14	5064.7	9722.37	4339.53	2914.19	ABAKI_c17260	Transcriptional regulator DeoR family
	Scaffold1	1822355	1824454	-	C5	1263.97	1083.48	2243.54	15074.6	ABAKI_c17270	Putative uncharacterized protein
	Scaffold1	1824423	1825115	-	C5	284.92	174.22	482.576	2301.13	ABAKI_c17280	Response regulators consisting of a CheY-like receiver domain and a winged-helix DNA-binding domain
	Scaffold1	1825282	1825929	-	N/A	3251.05	4986.92	5685.42	3271.32	ABAKI_c17290	TetR family transcriptional regulator
	Scaffold1	1826066	1826503	-	N/A	470.931	832.424	812.383	587.517	ABAKI_c17300	Amino acid-binding protein
	Scaffold1	1826514	1827812	-	N/A	1163.85	1570.26	2114.14	2237.55	ABAKI_c17310	Phenylacetate-coenzyme A ligase
	Scaffold1	1828223	1828489	-	N/A	12.4553	9.32617	5.49013	8.00162	ABAKI_c17320	Uncharacterized protein
	Scaffold1	1828507	1829877	-	N/A	56.2901	45.135	31.6281	65.6364	ABAKI_c17330	Amino acid transporter
	Scaffold1	1829908	1830024	-	N/A	0.737661	2.16729	0	0.44051	ABAKI_c17340	Uncharacterized protein
	Scaffold1	1830021	1830305	-	N/A	2.64732	2.76851	0	3.11979	ABAKI_c17350	Uncharacterized protein
	Scaffold1	1830302	1830559	-	N/A	1.90966	1.20244	1.34778	0	ABAKI_c17360	Uncharacterized protein
	Scaffold1	1831025	1834090	-	C11	75.2993	48.9242	35.1062	93.8716	ABAKI_c17370	Putative methyl-accepting chemotaxis sensory transducer
	Scaffold1	1834403	1835455	-	C4	1638.33	2176.46	3981.06	4117.74	ABAKI_c17380	Nicotinate-nucleotide--dimethylbenzimidazole phosphoribosyltransferase
	Scaffold1	1835710	1837188	-	N/A	965.9	663.197	1130.63	1039.76	ABAKI_c17390	Sensor histidine kinase
	Scaffold1	1837185	1837856	-	N/A	373.629	243.489	404.746	315.184	ABAKI_c17400	Two component transcriptional regulator, winged helix family
	Scaffold1	1838074	1838457	+	N/A	118.787	61.9134	72.4288	23.6128	ABAKI_c17410	Uncharacterized protein
	Scaffold1	1838646	1839458	-	N/A	2663.08	5328.42	2952.04	3874.89	ABAKI_c17420	Lipoprotein
	Scaffold1	1839595	1840254	-	N/A	1203.56	1783.67	1494.09	1677.34	ABAKI_c17430	D-methionine transport system permease protein MetI
	Scaffold1	1840244	1841290	-	N/A	1676.92	2132.22	1809.85	2104.22	ABAKI_c17440	Methionine import ATP-binding protein MetN
	Scaffold1	1841382	1841756	-	C9	140.267	116.809	259.285	477.571	ABAKI_c17450	Cyclic pyranopterin phosphate synthase
	Scaffold1	1841753	1842292	-	C9	396.025	285.715	510.659	760.138	ABAKI_c17460	Methionine-R-sulfoxide reductase
	Scaffold1	1842276	1843034	-	N/A	679.295	420.351	442.944	843.257	ABAKI_c17470	Uncharacterized protein
	Scaffold1	1844213	1844998	-	N/A	221.467	419.231	237.609	240.291	ABAKI_c17480	Transport permease protein
	Scaffold1	1845008	1845913	-	C8	457.515	774.425	591.209	260.657	ABAKI_c17490	ABC transport system ATP-binding protein
	Scaffold1	1845984	1846334	-	N/A	229.8	381.815	293.257	408.199	ABAKI_c17500	Putative transcriptional regulator, ArsR family
	Scaffold1	1846367	1846861	-	C14	836.96	1217.47	700.971	589.256	ABAKI_c17510	Phosphoesterase
	Scaffold1	1847056	1847655	-	N/A	1013.08	1327.74	1005.56	942.674	ABAKI_c17520	Non-canonical purine NTP pyrophosphatase
	Scaffold1	1847668	1848417	-	C14	2551.82	3387.28	1644.05	1207.87	ABAKI_c17530	Ribonuclease PH
	Scaffold1	1848515	1849951	-	N/A	5255.42	7596.33	6547.69	6305.39	ABAKI_c17540	Aspartyl/glutamyl-tRNA(Asn/Gln) amidotransferase subunit B
	Scaffold1	1849955	1851427	-	N/A	6238.04	8952.26	6025.12	4789.57	ABAKI_c17550	Glutamyl-tRNA(Gln) amidotransferase subunit A
	Scaffold1	1851437	1851724	-	N/A	1217.11	1593.78	1067.14	924.806	ABAKI_c17560	Aspartyl/glutamyl-tRNA(Asn/Gln) amidotransferase subunit C
	Scaffold1	1851866	1853857	-	N/A	3569.61	4313.66	5104.86	3239.59	ABAKI_c17570	DNA ligase
	Scaffold1	1853888	1856089	-	N/A	5509.99	6049.01	5603.62	4095.51	ABAKI_c17580	DNA helicase
	Scaffold1	1856214	1856327	-	N/A	48.7364	34.844	60.3436	41.0281	ABAKI_c17590	Uncharacterized protein
	Scaffold1	1856324	1857634	-	C8	3478.7	2874.36	2451.76	1328.54	ABAKI_c17600	Two component system histidine kinase
	Scaffold1	1857618	1858304	-	N/A	2743.98	2725.93	2813.88	1865.55	ABAKI_c17610	Two component system, response regulator
	Scaffold1	1858333	1860381	-	C8	7763.1	8782.12	5946.84	3458.47	ABAKI_c17620	Uncharacterized protein
	Scaffold1	1860577	1861653	-	C4	5040.94	4498.83	8115.07	10679.3	ABAKI_c17630	tRNA-specific 2-thiouridylase MnmA
	Scaffold1	1861690	1862931	-	N/A	5018.25	4733.8	6813.28	9123.5	ABAKI_c17640	Beta-lactamase domain protein
	Scaffold1	1863239	1863538	+	C4	478.57	863.452	2892.1	4432.5	ABAKI_c17650	Uncharacterized protein
	Scaffold1	1863837	1864502	-	C7	382.349	652.977	810.09	666.876	ABAKI_c17660	Uncharacterized protein
	Scaffold1	1864581	1865807	-	C7	573.563	1110.25	1575.54	1368.97	ABAKI_c17670	General secretory pathway protein F
	Scaffold1	1865816	1867477	-	C7	1124.27	1915.08	2527.5	2270.51	ABAKI_c17680	General secretion pathway protein E
	Scaffold1	1867741	1868073	-	N/A	17.9246	13.4789	15.5889	18.4774	ABAKI_c17690	Uncharacterized protein
	Scaffold1	1868067	1868315	-	N/A	13.6273	11.6753	8.11863	8.49646	ABAKI_c17700	Uncharacterized protein
	Scaffold1	1868611	1869819	-	C7	1366.13	2633.11	4133.19	3009.3	ABAKI_c17710	Aspartokinase
	Scaffold1	1869839	1871095	-	C7	1209.77	2034.47	3364.46	2512.65	ABAKI_c17720	Homoserine dehydrogenase
	Scaffold1	1871233	1872738	+	C7	401.487	1315.83	1329.07	993.924	ABAKI_c17730	Threonine synthase ThrC
	Scaffold1	1872731	1873621	+	C7	334.698	780.229	975.263	656.721	ABAKI_c17740	Homoserine kinase
	Scaffold1	1873626	1874060	+	C7	115.873	354.341	371.959	201.972	ABAKI_c17750	Phenylalanine biosynthesis protein PheB
	Scaffold1	1874246	1875394	-	N/A	639.622	740.435	712.133	513.361	ABAKI_c17760	Ig-like domain-containing protein,Transglutaminase-like superfamily protein
	Scaffold1	1875634	1876530	+	N/A	168.912	228.57	152.251	156.811	ABAKI_c17770	Radical SAM protein
	Scaffold1	1876651	1877304	+	N/A	598.961	516.229	557.454	500.833	ABAKI_c17780	tRNA (guanine-N(7)-)-methyltransferase
	Scaffold1	1877413	1877889	-	N/A	428.05	407.684	476.591	369.422	ABAKI_c17790	Uncharacterized protein
	Scaffold1	1878023	1878364	+	N/A	139.92	107.958	118.777	96.3155	ABAKI_c17800	Uncharacterized protein
	Scaffold1	1878402	1879223	-	N/A	282.402	306.367	401.968	376.035	ABAKI_c17810	Transcriptional regulator, effector-binding domain/component
	Scaffold1	1879264	1879599	-	C4	83.7169	76.6651	149.259	177.678	ABAKI_c17820	Branched-chain amino acid transporter AzlD
	Scaffold1	1879596	1880300	-	N/A	376.584	256.534	375.513	404.12	ABAKI_c17830	Branched-chain amino acid ABC transporter permease
	Scaffold1	1880489	1881001	+	N/A	179.591	243.04	260.652	273.269	ABAKI_c17840	Transcriptional regulator MarR family
	Scaffold1	1880998	1883235	+	N/A	981.924	1672.12	1331.07	1136.71	ABAKI_c17850	ABC transport system ATP-binding/permease protein
	Scaffold1	1883232	1885127	+	N/A	968.215	1666.86	1803.29	1242.86	ABAKI_c17860	ABC transport system ATP-binding/permease protein
	Scaffold1	1885457	1886773	-	N/A	803.892	474.449	676.429	523.517	ABAKI_c17870	Sensor histidine kinase
	Scaffold1	1886783	1887454	-	N/A	486.514	278.934	473.336	453.125	ABAKI_c17880	Heme response regulator HssR
	Scaffold1	1887464	1888636	-	N/A	625.653	319.79	636.884	641.454	ABAKI_c17890	Putative ABC transport system permease protein
	Scaffold1	1888629	1889318	-	C9	40.9278	17.8693	21.2132	75.8347	ABAKI_c17900	Putative ABC transport system ATP-binding protein
	Scaffold1	1889318	1890190	-	C9	42.0101	17.0305	38.9483	118.848	ABAKI_c17910	Putative membrane protein
	Scaffold1	1890390	1890611	+	C5	130.764	47.4139	381.776	934.623	ABAKI_c17920	Uncharacterized protein
	Scaffold1	1890822	1892060	+	N/A	9134.98	6488.75	11157	12051.2	ABAKI_c17930	Predicted glycosyltransferase
	Scaffold1	1892254	1893375	-	C4	439.156	760.234	1402.07	1312.9	ABAKI_c17940	Uncharacterized protein
	Scaffold1	1893561	1894289	-	C14	2343.69	5203.09	2874.29	2102.8	ABAKI_c17950	Glutamine ABC transport system ATP-binding protein GlnQ1
	Scaffold1	1894270	1894935	-	N/A	1320.59	1642.14	1904.65	1308.98	ABAKI_c17960	Glutamine ABC transport system permease protein GlnP1
	Scaffold1	1895087	1895857	-	N/A	6854.1	13247.2	12224.1	18003.8	ABAKI_c17970	Glutamine ABC transport system substrate binding protein GlnH1
	Scaffold1	1896146	1897561	-	C10	10422.4	14687.6	17125.7	8101.8	ABAKI_c17980	Uncharacterized protein
	Scaffold1	1897566	1898135	-	C10	2766.06	2116.9	2454.27	1047.95	ABAKI_c17990	Uncharacterized protein
	Scaffold1	1898440	1899657	+	N/A	3992.6	3599.53	5896.34	4560.28	ABAKI_c18000	Transcriptional regulator
	Scaffold1	1899760	1901130	-	N/A	1633.43	2159.49	3112.09	1826.24	ABAKI_c18010	Uncharacterized protein
	Scaffold1	1901140	1902516	-	N/A	1826.3	2404.82	3131.53	2219.68	ABAKI_c18020	Uncharacterized protein
	Scaffold1	1902569	1904437	-	C8	3845.23	6063.6	4855.23	1309.46	ABAKI_c18030	Uncharacterized protein
	Scaffold1	1904507	1905283	-	C8	1265.39	1919.21	1689.05	288.994	ABAKI_c18040	Uncharacterized protein
	Scaffold1	1905285	1905644	-	C8	522.214	719.586	712.487	194.942	ABAKI_c18050	Uncharacterized protein
	Scaffold1	1905641	1906363	-	C8	1333.91	1902.71	1671.13	735.04	ABAKI_c18060	Glycosyltransferase involved in cell wall biogenesis
	Scaffold1	1906373	1906720	-	C8	727.411	1041.79	695.867	433.79	ABAKI_c18070	Uncharacterized protein
	Scaffold1	1906745	1908142	-	N/A	2784.21	3147.99	2522.04	2144.97	ABAKI_c18080	Undecaprenyl-phosphate glucose phosphotransferase
	Scaffold1	1908165	1909037	-	N/A	1812.58	1722.78	2168.28	2212.31	ABAKI_c18090	Glycosyltransferase/rhamnosyltransferase
	Scaffold1	1909132	1910115	-	N/A	877.169	825.224	1300.36	1382.64	ABAKI_c18100	Glycosyl transferase GT2 family
	Scaffold1	1910305	1913754	-	N/A	2280.59	3177.43	1681.77	1742.35	ABAKI_c18110	Uncharacterized protein
	Scaffold1	1913920	1917048	-	N/A	28831.6	30582.4	28890.7	21365.1	ABAKI_c18120	SSU1127 undefined product 1145568:1148675 reverse MW:113187
	Scaffold1	1917256	1919574	-	N/A	4489.37	8141.35	8244.76	5867.85	ABAKI_c18130	Glycosyl transferase family 2
	Scaffold1	1919598	1920794	-	N/A	2375.6	4382.79	3393.99	2675.52	ABAKI_c18140	ABC transport system ATP-binding protein
	Scaffold1	1920828	1921637	-	N/A	1203.81	2379.22	1969.32	1790.93	ABAKI_c18150	Transport permease protein
	Scaffold1	1921802	1922905	-	N/A	7176.4	9531.71	6670.41	7842.1	ABAKI_c18160	dTDP-glucose 4,6-dehydratase
	Scaffold1	1922922	1923488	-	N/A	1417.19	1443.93	2045.47	2612.18	ABAKI_c18170	dTDP-4-dehydrorhamnose 3,5-epimerase RfbC
	Scaffold1	1923497	1924366	-	N/A	4533.66	5506.09	4387.22	5751.76	ABAKI_c18180	Glucose-1-phosphate thymidylyltransferase
	Scaffold1	1924387	1925244	-	N/A	2560.61	3301.51	3776.27	4035.23	ABAKI_c18190	dTDP-4-dehydrorhamnose reductase RfbD
	Scaffold1	1925428	1926798	+	N/A	9185.4	8647.3	5908.01	8772.68	ABAKI_c18200	Putative membrane protein
	Scaffold1	1927038	1928741	-	N/A	4044.29	5365.22	5289.29	6374.38	ABAKI_c18210	Phosphoglucomutase Pgm1
	Scaffold1	1928923	1930707	-	C5	7064.27	214.49	110.576	966.676	ABAKI_c18220	Possible surface protein, responsible for cell interaction contains cell adhesion domain and ChW-repeats
	Scaffold1	1931101	1932546	-	C8	21081.3	23577.7	17358.8	10902.4	ABAKI_c18230	Uncharacterized protein
	Scaffold1	1932934	1936539	-	N/A	3982.18	6852.73	5669.77	4772.09	ABAKI_c18240	Possible surface protein, responsible for cell interaction contains cell adhesion domain and ChW-repeats
	Scaffold1	1936885	1937520	+	C7	59.9784	118.794	143.702	198.225	ABAKI_c18250	Uncharacterized protein
	Scaffold1	1937520	1938593	+	C4	184.101	344.035	564.861	682.717	ABAKI_c18260	Radical SAM protein
	Scaffold1	1938786	1939550	-	C3	734.988	347.824	407.094	468.892	ABAKI_c18270	Uncharacterized protein
	Scaffold1	1939620	1939733	-	N/A	14.8429	3.97095	7.80245	5.79907	ABAKI_c18280	Transposase
	Scaffold1	1939930	1942932	-	C7	196742	515923	520865	299709	ABAKI_c18290	Endoglucanase
	Scaffold1	1943366	1944238	-	N/A	4632.65	4805.19	3283.95	3347.98	ABAKI_c18300	UTP--glucose-1-phosphate uridylyltransferase
	Scaffold1	1944241	1945569	-	N/A	4037.47	3785.78	3020.45	2786.74	ABAKI_c18310	UDP-glucose 6-dehydrogenase TuaD
	Scaffold1	1945582	1946649	-	N/A	1257.03	1055.4	1348.72	1253.83	ABAKI_c18320	Rod shape-determining protein MreB
	Scaffold1	1946819	1947217	-	C7	3125.52	15392.2	9966.46	12351.4	ABAKI_c18330	F-type ATP synthase subunit C, sodium ion specific
	Scaffold1	1947233	1948633	-	C7	6661.74	32941.5	21419.9	25235.1	ABAKI_c18340	F-type ATP synthase subunit D, sodium ion specific
	Scaffold1	1948723	1949607	-	C7	5276.04	25997.6	13059.7	17028.3	ABAKI_c18350	F-type ATP synthase subunit G, sodium ion specific
	Scaffold1	1949632	1951140	-	C7	5774.64	32286	18757.2	26352.6	ABAKI_c18360	F-type ATP synthase subunit A, sodium ion specific
	Scaffold1	1951156	1951698	-	C7	1171.4	6749.75	3145.66	4031.69	ABAKI_c18370	F-type ATP synthase subunit H
	Scaffold1	1951695	1952201	-	C7	1511.87	9115.75	5462.45	5242.11	ABAKI_c18380	F-type ATP synthase subunit F
	Scaffold1	1952264	1952512	-	C7	349.281	1826.46	1109.98	997.376	ABAKI_c18390	F-type ATP synthase subunit E
	Scaffold1	1952569	1952817	-	C7	253.846	1459.18	822.744	987.515	ABAKI_c18400	F-type ATP synthase subunit E
	Scaffold1	1952850	1953149	-	C7	834.48	4202	2222.78	3514.69	ABAKI_c18410	F-type ATP synthase subunit E
	Scaffold1	1953175	1953837	-	C7	1721.92	7716.55	5984.23	7138.21	ABAKI_c18420	F-type ATP synthase subunit B
	Scaffold1	1953914	1954303	-	C7	553.43	1825.99	1765.45	1471.09	ABAKI_c18430	ATP synthase protein I
	Scaffold1	1954290	1954568	-	C7	473.438	838.101	1201.77	580.451	ABAKI_c18440	Uncharacterized protein
	Scaffold1	1954769	1955221	-	C4	292.433	479.722	1038.36	599.623	ABAKI_c18450	Ribose 5-phosphate isomerase B
	Scaffold1	1955236	1956282	-	C4	1118.58	1814.89	3897.69	3007.28	ABAKI_c18460	Threonylcarbamoyl-AMP synthase
	Scaffold1	1956327	1957760	-	C4	1731.05	2919.81	6385.03	5388.75	ABAKI_c18470	Nicotinate phosphoribosyltransferase
	Scaffold1	1958008	1958400	-	C4	1193.24	1200.51	2168.53	2536.86	ABAKI_c18480	Arsenite efflux ATP-binding protein ArsA
	Scaffold1	1958611	1959405	-	N/A	722.034	656.078	693.89	440.567	ABAKI_c18490	Uncharacterized protein
	Scaffold1	1959859	1961274	-	N/A	1903.55	2086.92	1804.6	1069.96	ABAKI_c18500	Uncharacterized protein
	Scaffold1	1961375	1961983	-	N/A	799.034	809.759	756.392	527.988	ABAKI_c18510	Uncharacterized protein
	Scaffold1	1961980	1962489	-	N/A	514.895	503.63	428.237	311.81	ABAKI_c18520	Uncharacterized protein
	Scaffold1	1962500	1964671	-	N/A	1380.71	1492.03	1459.31	767.028	ABAKI_c18530	Uncharacterized protein
	Scaffold1	1964755	1965510	-	N/A	1087.6	1232.59	1283.59	1090.24	ABAKI_c18540	Uncharacterized protein
	Scaffold1	1965510	1967057	-	N/A	1926.9	2085.03	2193.16	1739.67	ABAKI_c18550	Uncharacterized protein
	Scaffold1	1967070	1968254	-	N/A	1315.01	1251.36	2248.02	1434.84	ABAKI_c18560	Type IV fimbrial assembly protein PilC
	Scaffold1	1968480	1969244	-	C4	135.972	175.059	606.437	624.455	ABAKI_c18570	Type 4 prepilin-like proteins leader peptide-processing enzyme
	Scaffold1	1969268	1969666	-	C4	43.5728	65.5208	247.42	317.013	ABAKI_c18580	Uncharacterized protein
	Scaffold1	1969644	1971101	-	C4	536.942	552.008	1761.17	1552.08	ABAKI_c18590	Uncharacterized protein
	Scaffold1	1971234	1971707	-	C4	440.418	1423.96	7155.02	7883.37	ABAKI_c18600	Uncharacterized protein
	Scaffold1	1972488	1973543	-	C14	849.91	1792.13	903.974	595.87	ABAKI_c18610	Pili retraction protein PilT
	Scaffold1	1973554	1975233	-	C7	1101.48	2228.22	2038.65	1787.89	ABAKI_c18620	Type IV pilus assembly protein PilB
	Scaffold1	1975272	1977488	-	N/A	4859.36	8048.38	6034.78	5601.13	ABAKI_c18630	Diguanylate cyclase/phosphodiesterase with PAS/PAC sensor(S)
	Scaffold1	1977870	1981070	-	N/A	3989.27	6274.63	6503.37	7467.57	ABAKI_c18640	Carbamoyl-phosphate synthase large chain
	Scaffold1	1981061	1982179	-	N/A	912.961	1297.8	1690.26	2277.92	ABAKI_c18650	Carbamoyl-phosphate synthase small chain
	Scaffold1	1982245	1983687	-	N/A	7109.98	8381.86	10881.8	12177.3	ABAKI_c18660	Adenylosuccinate synthetase
	Scaffold1	1983786	1984361	-	N/A	699.219	680.8	494.792	928.704	ABAKI_c18670	Response regulator receiver and ANTAR domain containing protein
	Scaffold1	1984406	1985695	-	N/A	1025.07	1052.69	616.868	1196.55	ABAKI_c18680	Glutamine synthetase GlnA2
	Scaffold1	1985714	1986436	-	C11	614.119	593.173	289.885	554.129	ABAKI_c18690	Glutamate synthase
	Scaffold1	1986453	1987703	-	C11	762.539	677.472	340.359	727.136	ABAKI_c18700	NADH dependant phenylglyoxylate
	Scaffold1	1987703	1988155	-	C11	130.98	112.656	80.6113	199.414	ABAKI_c18710	Fe-S-cluster-containing hydrogenase components 2
	Scaffold1	1988185	1989690	-	C11	610.599	542.333	298.434	597.541	ABAKI_c18720	Glutamate synthase
	Scaffold1	1989880	1990974	-	C3	432.83	423.903	193.451	294.945	ABAKI_c18730	Uncharacterized protein
	Scaffold1	1991411	1992757	-	N/A	870.849	1408.9	1456.6	1412.26	ABAKI_c18740	Uncharacterized protein
	Scaffold1	1992816	1993166	-	C3	1082.38	385.9	624.977	496.916	ABAKI_c18750	Uncharacterized protein
	Scaffold1	1993446	1995551	+	C11	8908.14	12784.2	5301.21	15248.7	ABAKI_c18760	Glutamine synthetase GlnA1
	Scaffold1	1995627	1995965	+	C6	693.959	304.757	120.738	232.138	ABAKI_c18770	Nitrogen regulatory protein P-II 1
	Scaffold1	1996111	1997379	+	C11	25.7355	19.5614	8.88513	43.8703	ABAKI_c18780	Ammonium transporter
	Scaffold1	1997532	1997975	-	C3	1687.04	919.87	823.845	895.062	ABAKI_c18790	Flavodoxin
	Scaffold1	1998125	1999252	-	C3	2887.6	1852.09	1354	1267.63	ABAKI_c18800	Uncharacterized protein
	Scaffold1	1999245	2000378	-	N/A	1535.96	872.945	841.14	909.485	ABAKI_c18810	Uncharacterized protein
	Scaffold1	2000516	2001790	-	N/A	1086.37	789.752	602.024	655.351	ABAKI_c18820	Uncharacterized protein
	Scaffold1	2001780	2005865	-	N/A	3386.34	2563.94	1881.95	1897.53	ABAKI_c18830	Uncharacterized protein
	Scaffold1	2005867	2007012	-	C3	772.641	401.112	345.112	363.828	ABAKI_c18840	Uncharacterized protein
	Scaffold1	2006999	2008513	-	N/A	948.495	728.003	719.463	634.128	ABAKI_c18850	Uncharacterized protein
	Scaffold1	2008521	2009438	-	N/A	359.567	330.486	299.501	300.611	ABAKI_c18860	5'-nucleotidase
	Scaffold1	2010086	2011126	+	C4	1303.76	622.172	3975.48	2068.31	ABAKI_c18870	Putative methyltransferase CheR
	Scaffold1	2011280	2012812	+	C5	116.53	78.4275	145.215	952.836	ABAKI_c18880	ABC-type antimicrobial peptide transport system, permease component
	Scaffold1	2012826	2013476	+	C5	45.5698	28.0343	79.2476	411.946	ABAKI_c18890	ABC-type antimicrobial peptide transport system, ATPase component
	Scaffold1	2013581	2014522	-	N/A	625.257	489.074	683.794	818.637	ABAKI_c18900	Uncharacterized protein
	Scaffold1	2014579	2015424	-	N/A	495.235	449.896	692.526	661.066	ABAKI_c18910	Uncharacterized protein
	Scaffold1	2015437	2016108	-	N/A	350.853	223.578	323.605	408.084	ABAKI_c18920	Integral membrane protein
	Scaffold1	2016140	2017003	-	C9	348.153	241.588	433.717	718.936	ABAKI_c18930	Dehydrosqualene synthase
	Scaffold1	2017003	2018502	-	C12	802.552	483.327	1019.12	1194.1	ABAKI_c18940	Squalene synthase
	Scaffold1	2019012	2019899	+	C14	1253.64	1487.75	695.768	483.761	ABAKI_c18950	LysR family transcriptional regulator
	Scaffold1	2019901	2020422	-	N/A	20.8752	18.359	17.0038	25.1937	ABAKI_c18960	Superoxide reductase
	Scaffold1	2020398	2021729	-	N/A	94.6532	82.1463	64.7031	57.5805	ABAKI_c18970	Major facilitator superfamily MFS_1
	Scaffold1	2021929	2023614	-	N/A	191.133	177.757	136.975	120.248	ABAKI_c18980	Predicted AMP-dependent ligase/synthetase
	Scaffold1	2023787	2025142	-	N/A	123.516	115.858	112.805	164.39	ABAKI_c18990	Uncharacterized protein
	Scaffold1	2025162	2026175	-	N/A	69.3107	41.5835	30.0472	60.4952	ABAKI_c19000	Electron transfer flavoprotein alpha subunit
	Scaffold1	2026193	2026981	-	C11	72.043	83.5864	30.7466	61.0683	ABAKI_c19010	Electron transfer flavoprotein subunit beta
	Scaffold1	2026994	2028136	-	N/A	76.1219	55.1327	34.0395	51.8357	ABAKI_c19020	Acyl-CoA dehydrogenase, short-chain specific
	Scaffold1	2028154	2029377	-	N/A	66.2267	55.0067	41.4938	71.6347	ABAKI_c19030	E-cinnamoyl-CoA:R-phenyllactate CoA transferase
	Scaffold1	2029461	2030627	-	N/A	168.693	195.362	223.629	198.858	ABAKI_c19040	Acyl-CoA dehydrogenase
	Scaffold1	2030934	2031467	-	N/A	109.625	119.102	207.759	125.57	ABAKI_c19050	Uncharacterized protein
	Scaffold1	2031671	2033098	+	N/A	808.405	896.155	863.26	604.818	ABAKI_c19060	Diguanylate cyclase
	Scaffold1	2033229	2033873	-	C5	549.138	213.091	212.949	737.413	ABAKI_c19070	Microcompartments protein
	Scaffold1	2033955	2036495	-	N/A	471.363	266.754	451.021	431.806	ABAKI_c19080	ABC-type transport system, involved in lipoprotein release, permease component
	Scaffold1	2036492	2037169	-	C12	91.3579	41.7653	94.2041	108.752	ABAKI_c19090	ABC-type antimicrobial peptide transport system, ATPase component
	Scaffold1	2037354	2038271	-	C12	3325.92	1111.51	2879.32	4724.87	ABAKI_c19100	Sensor protein resE
	Scaffold1	2038258	2038950	-	C12	2615.71	1080.21	2374.1	4895.39	ABAKI_c19110	Vancomycin response regulator
	Scaffold1	2039044	2041038	-	C9	4887.9	2098.89	3930.77	9768.64	ABAKI_c19120	NADH:flavin oxidoreductase/NADH oxidase
	Scaffold1	2041086	2041541	-	C9	1135.03	481.93	849.99	2206.65	ABAKI_c19130	Peroxiredoxin
	Scaffold1	2041561	2041719	-	N/A	3.08166	1.38426	1.51386	0.44051	ABAKI_c19140	Uncharacterized protein
	Scaffold1	2042429	2042890	-	N/A	904.973	579.609	646.373	502.003	ABAKI_c19150	Uncharacterized protein
	Scaffold1	2043295	2044497	-	N/A	786.353	669.404	952.06	702.455	ABAKI_c19160	Cation diffusion facilitator family transporter
	Scaffold1	2045020	2045451	+	C4	226.806	213.118	426.595	493.043	ABAKI_c19170	Putative fluoride ion transporter CrcB
	Scaffold1	2045470	2045829	+	C4	183.23	270.614	429.52	533.522	ABAKI_c19180	Putative fluoride ion transporter CrcB
	Scaffold1	2046170	2046556	-	N/A	69.83	49.0502	49.9126	45.4151	ABAKI_c19190	N-6 DNA methylase
	Scaffold1	2046507	2046638	-	N/A	43.1845	19.799	18.4857	9.8542	ABAKI_c19200	N-6 DNA methylase
	Scaffold1	2047610	2049955	+	C11	1411.82	1310.23	370.359	1695.25	ABAKI_c19210	Anaerobic ribonucleoside-triphosphate reductase
	Scaffold1	2049933	2050394	+	C11	211.924	219.775	68.9476	281.102	ABAKI_c19220	Anaerobic ribonucleoside-triphosphate reductase-activating protein
	Scaffold1	2050411	2051088	-	C9	742.176	401.377	470.685	1343.61	ABAKI_c19230	Putative NAD(P)H nitroreductase yfkO
	Scaffold1	2051395	2052279	+	C9	567.104	322.893	403.2	934.968	ABAKI_c19240	ABC transport system ATP-binding protein
	Scaffold1	2052281	2053078	+	C9	197.552	128.009	240.914	636.246	ABAKI_c19250	Uncharacterized protein
	Scaffold1	2053088	2053885	+	C9	277.626	191.782	340.548	824.936	ABAKI_c19260	Transport protein
	Scaffold1	2053962	2054216	+	C12	5952.74	2083.19	6586.62	11319.5	ABAKI_c19270	Membrane protein
	Scaffold1	2054309	2054974	-	C5	74.9063	123.003	114.354	1061.4	ABAKI_c19280	Deoxyribose-phosphate aldolase
	Scaffold1	2055014	2056519	-	C5	257.19	330.36	225.29	2432.15	ABAKI_c19290	Ribulokinase
	Scaffold1	2056525	2057574	-	C5	88.1429	142.872	113.801	1363.83	ABAKI_c19300	Galactitol-1-phosphate 5-dehydrogenase GatD
	Scaffold1	2057889	2058734	+	N/A	808.182	870.497	1228.46	1204.68	ABAKI_c19310	Putative RpiR-family transcriptional regulator
	Scaffold1	2058944	2059987	+	N/A	948.029	1225.35	1319.6	1459.46	ABAKI_c19320	Glycerol-3-phosphate dehydrogenase
	Scaffold1	2060051	2060692	+	N/A	1050.19	698.417	994.381	1074.95	ABAKI_c19330	Alkaline phosphatase
	Scaffold1	2060692	2061189	+	N/A	483.334	371.357	552.328	567.996	ABAKI_c19340	Uncharacterized protein
	Scaffold1	2061273	2061806	+	N/A	3843.28	3489.15	3212.95	2853.69	ABAKI_c19350	Uncharacterized protein
	Scaffold1	2061975	2062172	-	N/A	541.722	497.254	417.007	425.801	ABAKI_c19360	Uncharacterized protein
	Scaffold1	2062169	2062423	-	N/A	448.052	385.745	587.093	651.929	ABAKI_c19370	Uncharacterized protein
	Scaffold1	2062556	2063575	-	N/A	1645.63	1432.63	1661.6	1526.35	ABAKI_c19380	Cysteine synthase CysK1
	Scaffold1	2069720	2070112	-	C3	535.248	284.541	183.311	108.312	ABAKI_c19390	Uncharacterized protein
	Scaffold1	2070238	2070630	+	C7	112.231	494.582	4378.62	832.721	ABAKI_c19400	Pyridoxamine 5-phosphate oxidase
	Scaffold1	2070961	2071455	+	C7	1976.56	4782.71	3903.91	3524.61	ABAKI_c19410	Transporter
	Scaffold1	2077486	2078298	-	C3	1486.18	1128.46	717.713	712.181	ABAKI_c19420	Uncharacterized protein
	Scaffold1	2078351	2079073	-	N/A	1326.43	1008.81	802.118	1024.84	ABAKI_c19430	Uncharacterized protein
	Scaffold1	2079109	2079702	-	N/A	839.013	567.124	687.937	986.375	ABAKI_c19440	TatD family hydrolase
	Scaffold1	2079922	2080122	-	N/A	1808.22	1381.69	1921.75	2021.62	ABAKI_c19450	Uncharacterized protein
	Scaffold1	2080250	2081740	-	N/A	7909.45	4575.65	4083.26	7157.67	ABAKI_c19460	Uncharacterized protein
	Scaffold1	2082189	2082923	-	C9	47.2198	16.2475	25.2565	86.5518	ABAKI_c19470	Putative uncharacterized protein
	Scaffold1	2082927	2083679	-	C5	108.499	40.1992	41.3948	118.257	ABAKI_c19480	Uncharacterized protein
	Scaffold1	2083676	2084590	-	C9	100.688	46.3932	47.118	144.072	ABAKI_c19490	ABC transport system ATP-binding protein
	Scaffold1	2084798	2085517	+	C12	263.174	119.269	233.361	250.863	ABAKI_c19500	Two component transcriptional regulator, winged helix family
	Scaffold1	2085514	2086872	+	N/A	1200.05	746.796	900.774	859.707	ABAKI_c19510	Uncharacterized protein
	Scaffold1	2086943	2088427	-	N/A	533.548	434.584	653.191	589.165	ABAKI_c19520	Uncharacterized protein
	Scaffold1	2088428	2089363	-	N/A	425.837	329.941	533.309	619.826	ABAKI_c19530	Glycosyl transferase, family 2
	Scaffold1	2089763	2090335	-	C9	142.091	124.513	196.227	667.396	ABAKI_c19540	Biotin biosynthesis protein BioY
	Scaffold1	2090332	2091318	-	C9	604.564	564.986	491.454	1298.82	ABAKI_c19550	Bifunctional ligase/repressor BirA
	Scaffold1	2091409	2092929	-	N/A	7135.5	3804.59	4683.93	6869.59	ABAKI_c19560	Xaa-His dipeptidase
	Scaffold1	2093072	2093695	+	N/A	1773.82	2421.57	1747.9	3072.29	ABAKI_c19570	Uncharacterized protein
	Scaffold1	2093958	2094242	-	C4	131.369	108.726	296.844	182.656	ABAKI_c19580	Uncharacterized protein
	Scaffold1	2094499	2095302	+	N/A	2808.84	2253.91	2352.18	4258.74	ABAKI_c19590	N-acetylglucosamine phosphatase
	Scaffold1	2095387	2095671	-	N/A	533.293	630.659	866.083	844.427	ABAKI_c19600	Galactitol-specific phosphotransferase enzyme IIB component
	Scaffold1	2095704	2096354	-	N/A	1820.39	2146.86	2825.41	2098.89	ABAKI_c19610	Ribulose-phosphate 3-epimerase
	Scaffold1	2096399	2096851	-	C14	1998.69	2675.57	1640.31	1062.82	ABAKI_c19620	Galactitol-specific phosphotransferase enzyme IIA component
	Scaffold1	2096851	2099352	-	N/A	8246.02	11661.9	8990.22	7719.6	ABAKI_c19630	DNA gyrase subunit A
	Scaffold1	2099373	2101289	-	N/A	5292.32	6964.23	4540.9	3632.34	ABAKI_c19640	DNA gyrase subunit B
	Scaffold1	2101273	2102427	-	C10	1568.37	1743.99	2590.19	1233.2	ABAKI_c19650	DNA replication and repair protein RecF
	Scaffold1	2102427	2102648	-	C10	705.893	784.983	1184.67	491.195	ABAKI_c19660	RNA-binding protein containing S4 domain
	Scaffold1	2102851	2103963	-	N/A	2105.26	2895.66	3138.24	1968.87	ABAKI_c19670	DNA polymerase III subunit beta
	Scaffold1	2104174	2105529	-	N/A	3565.84	2826.06	2725.24	1883.67	ABAKI_c19680	Chromosomal replication initiator protein DnaA
	Scaffold1	2106193	2106534	+	C14	4073.55	5262.2	3991.53	1653.96	ABAKI_c19690	Ribonuclease P protein component
	Scaffold1	2106536	2106748	+	N/A	544.792	711.407	885.271	623.282	ABAKI_c19700	Putative membrane protein insertion efficiency factor
	Scaffold1	2106789	2107745	+	C14	10088.7	14892.2	8495.35	7055.91	ABAKI_c19710	Putative membrane protein insertase, YidC/Oxa1 family
	Scaffold1	2107781	2108410	+	N/A	6748.03	9975.03	8676.19	7867.16	ABAKI_c19720	Single-stranded nucleic acid binding R3H domain containing protein
	Scaffold1	2108576	2109955	+	N/A	1771.61	1846.67	1288.3	1516.25	ABAKI_c19730	tRNA modification GTPase MnmE
	Scaffold1	2109966	2111873	+	N/A	2412.96	2648.78	1908.58	2361.37	ABAKI_c19740	tRNA uridine 5-carboxymethylaminomethyl modification enzyme MnmG
	Scaffold1	2111866	2112585	+	C3	1600.28	1256.07	686.707	817.93	ABAKI_c19750	Ribosomal RNA small subunit methyltransferase G
	Scaffold1	2112796	2113560	+	C3	4175.62	3598.35	1794.13	1913.51	ABAKI_c19760	Sporulation initiation inhibitor protein Soj2
	Scaffold1	2113563	2114459	+	N/A	4420.68	3984.24	2589.41	3106.27	ABAKI_c19770	Chromosome partitioning protein ParB
	Scaffold1	2114511	2115605	+	N/A	7838.7	7606.52	5424.7	5695.88	ABAKI_c19780	Uncharacterized protein
	Scaffold1	2115602	2116246	+	N/A	1900.69	1681.33	1044.58	1785.88	ABAKI_c19790	Uncharacterized protein
	Scaffold1	2116256	2117128	+	N/A	1992.17	1718.27	1319.77	1824.97	ABAKI_c19800	Mechanosensitive ion channel
	Scaffold1	2117118	2117312	+	N/A	159.191	145.57	101.32	147.608	ABAKI_c19810	Uncharacterized protein
	Scaffold1	2117321	2117947	+	C3	2191.48	1549.69	781.636	1098.31	ABAKI_c19820	Uncharacterized protein
	Scaffold1	2118096	2118383	+	N/A	4948.42	11521.4	7002.65	5401.97	ABAKI_c19830	30S ribosomal protein S6
	Scaffold1	2118395	2118835	+	C7	5779.86	11879.2	10409	10698.4	ABAKI_c19840	Single-stranded DNA-binding protein
	Scaffold1	2118853	2119080	+	C7	2771.86	5691.74	6854.44	8051.37	ABAKI_c19850	30S ribosomal protein S18
	Scaffold1	2119276	2120229	+	N/A	1982.61	1733.64	2301.62	2520.68	ABAKI_c19860	Uncharacterized protein
	Scaffold1	2120226	2122202	+	N/A	4528.79	4845.41	4405.75	4406.22	ABAKI_c19870	Phosphoesterase
	Scaffold1	2122199	2122648	+	N/A	1457.88	1742.62	2033.98	1693.03	ABAKI_c19880	50S ribosomal protein L9
	Scaffold1	2122663	2124018	+	N/A	3267.45	3847.52	4540.09	4644.26	ABAKI_c19890	Replicative DNA helicase
	Scaffold1	2124031	2125419	+	N/A	2717.87	3042.45	3983.78	3987.3	ABAKI_c19900	Uncharacterized protein
	Scaffold1	2125382	2126263	+	N/A	2468.48	2831.99	2963.22	2652.72	ABAKI_c19910	Ribosomal RNA small subunit methyltransferase I
	Scaffold1	2126317	2128260	+	N/A	6477.91	7432.43	9072.56	10725.5	ABAKI_c19920	Methionine--tRNA ligase
	Scaffold1	2128359	2128685	-	C4	247.989	331.87	530.869	788.929	ABAKI_c19930	Thioredoxin
	Scaffold1	2128794	2130242	+	N/A	2362.73	1637.67	2659.51	2224.55	ABAKI_c19940	Orn/Lys/Arg decarboxylase major region
	Scaffold1	2130232	2130927	+	N/A	1127.86	925.562	1297.76	1146.14	ABAKI_c19950	Thymidylate kinase
	Scaffold1	2130920	2131210	+	N/A	298.543	269.831	448.402	319.468	ABAKI_c19960	Uncharacterized protein
	Scaffold1	2131240	2132232	+	N/A	1815.63	1566.48	1809.17	1634.65	ABAKI_c19970	DNA polymerase III gamma/tau subunit DnaX2
	Scaffold1	2132232	2133071	+	N/A	1459.04	1799.68	1512.79	1685.75	ABAKI_c19980	Stage 0 sporulation protein
[truncated: 1,975 more rows]
