# Supplementary material for: Genome-scale analysis of Acetobacterium bakii reveals the cold adaptation of psychrotolerant acetogens by post-transcriptional regulation
Source: RNA. 2018 Dec;24(12):1839–55. doi: 10.1261/rna.068239.118 (PMC6239172; doi:10.1261/rna.068239.118)
Supplement: Supplemental Material [file supp_068239.118_Supplemental_Table_S6.xlsx]

## Sheet: Total TSS
Table S6. Listing of transcription start-sites in A. bakii.
TSS ID	Scaffold	Position	Strand	Abundance	Category I	Category II	Locus_tag
ABK_TSS0001	Scaf1	2089	+	1911.35	P	Conditional	ABAKI_c00060
ABK_TSS0002	Scaf1	6335	+	97.4369	P	Conserved	ABAKI_c00100
ABK_TSS0003	Scaf1	8529	+	80.0624	P	Conditional	ABAKI_c00130
ABK_TSS0004	Scaf1	8972	+	42.5216	P	Specific	ABAKI_c00140
ABK_TSS0005	Scaf1	11643	+	22.3532	A	Specific	ABAKI_c00180
ABK_TSS0006	Scaf1	17103	+	4627.9	P	Conserved	ABAKI_c00240
ABK_TSS0007	Scaf1	17879	+	1083.85	P	Conditional	ABAKI_c00250
ABK_TSS0008	Scaf1	23805	+	140.87	P	Specific	ABAKI_c00320
ABK_TSS0009	Scaf1	23894	+	38.0588	S	Specific	ABAKI_c00320
ABK_TSS0010	Scaf1	29773	+	591.927	P	Conditional	ABAKI_c00360
ABK_TSS0011	Scaf1	31518	+	21.663	P	Specific	ABAKI_c00370
ABK_TSS0012	Scaf1	36369	+	21.8333	S	Specific	ABAKI_c00400
ABK_TSS0013	Scaf1	36469	+	1292.39	P	Conditional	ABAKI_c00400
ABK_TSS0014	Scaf1	39787	+	218.331	P	Specific	ABAKI_c00420
ABK_TSS0015	Scaf1	41096	+	278	P	Specific	ABAKI_c00440
ABK_TSS0016	Scaf1	41123	+	113.071	S	Conditional	ABAKI_c00440
ABK_TSS0017	Scaf1	41187	+	197.942	S	Conditional	ABAKI_c00440
ABK_TSS0018	Scaf1	44086	+	124.762	P	Specific	ABAKI_c00480
ABK_TSS0019	Scaf1	46290	+	123.235	P	Conditional	ABAKI_c00510
ABK_TSS0020	Scaf1	46564	+	650.824	P	Specific	ABAKI_c00520
ABK_TSS0021	Scaf1	46735	+	46.986	S	Specific	ABAKI_c00520
ABK_TSS0022	Scaf1	48986	+	583.347	A	Specific	ABAKI_c00530
ABK_TSS0023	Scaf1	54137	+	6.55781	P	Specific	ABAKI_c00580
ABK_TSS0024	Scaf1	54854	+	4642.31	P	Conserved	ABAKI_c00590
ABK_TSS0025	Scaf1	55630	+	1092.28	P	Conditional	ABAKI_c00600
ABK_TSS0026	Scaf1	56627	+	1243.89	P	Conditional	ABAKI_c00620
ABK_TSS0027	Scaf1	59945	+	288.775	P	Conditional	ABAKI_c00640
ABK_TSS0028	Scaf1	61281	+	279.728	P	Conditional	ABAKI_c00660
ABK_TSS0029	Scaf1	61345	+	63.2301	S	Specific	ABAKI_c00660
ABK_TSS0030	Scaf1	65584	+	186.792	A	Specific	ABAKI_c00690
ABK_TSS0031	Scaf1	68075	+	102214	P	Conserved	ABAKI_c00720
ABK_TSS0032	Scaf1	69086	+	871.525	P	Conserved	ABAKI_c00730
ABK_TSS0033	Scaf1	70838	+	70.8778	P	Specific	ABAKI_c00770
ABK_TSS0034	Scaf1	71774	+	20152.6	P	Conserved	ABAKI_c00780
ABK_TSS0035	Scaf1	73644	+	1361.89	P	Specific	ABAKI_c00790
ABK_TSS0036	Scaf1	77703	+	146.003	N	Conditional	N/A
ABK_TSS0037	Scaf1	78584	+	96.56	N	Specific	N/A
ABK_TSS0038	Scaf1	78688	+	2642.83	P	Conditional	ABAKI_c00830
ABK_TSS0039	Scaf1	83594	+	8215.14	P	Conserved	ABAKI_c00890
ABK_TSS0040	Scaf1	86572	+	24730.4	P	Conserved	ABAKI_c00920
ABK_TSS0041	Scaf1	87957	+	2716.49	P	Conserved	ABAKI_c00930
ABK_TSS0042	Scaf1	91560	+	3038.82	P	Conserved	ABAKI_c00950
ABK_TSS0043	Scaf1	96391	+	152.564	P	Specific	ABAKI_c00970
ABK_TSS0044	Scaf1	98811	+	984.982	P	Conditional	ABAKI_c00990
ABK_TSS0045	Scaf1	101561	+	1924.11	P	Conditional	ABAKI_c01020
ABK_TSS0046	Scaf1	105808	+	127.48	P	Conditional	ABAKI_c01050
ABK_TSS0047	Scaf1	108002	+	77.4299	P	Conditional	ABAKI_c01080
ABK_TSS0048	Scaf1	108445	+	47.0263	P	Specific	ABAKI_c01090
ABK_TSS0049	Scaf1	110696	+	546.182	A	Specific	ABAKI_c01100
ABK_TSS0050	Scaf1	116562	+	89.026	P	Conserved	ABAKI_c01150
ABK_TSS0051	Scaf1	117339	+	1103.43	P	Conditional	ABAKI_c01160
ABK_TSS0052	Scaf1	120340	+	4.48492	P	Specific	ABAKI_c01190
ABK_TSS0053	Scaf1	123265	+	138.854	P	Specific	ABAKI_c01230
ABK_TSS0054	Scaf1	123354	+	39.0433	S	Specific	ABAKI_c01230
ABK_TSS0055	Scaf1	130636	+	278.372	P	Specific	ABAKI_c01320
ABK_TSS0056	Scaf1	134840	+	19131.2	P	Conditional	ABAKI_c01340
ABK_TSS0057	Scaf1	137935	+	83.0466	S	Specific	ABAKI_c01380
ABK_TSS0058	Scaf1	138076	+	941.115	P	Specific	ABAKI_c01380
ABK_TSS0059	Scaf1	142432	+	921.376	P	Conditional	ABAKI_c01430
ABK_TSS0060	Scaf1	143874	+	181.701	P	Conditional	ABAKI_c01440
ABK_TSS0061	Scaf1	144912	+	457.263	P	Conditional	ABAKI_c01450
ABK_TSS0062	Scaf1	151331	+	336.839	P	Conditional	ABAKI_c01520
ABK_TSS0063	Scaf1	154268	+	1048.96	P	Conserved	ABAKI_c01550
ABK_TSS0064	Scaf1	155688	+	1134.01	P	Conserved	ABAKI_c01560
ABK_TSS0065	Scaf1	155743	+	10.176	S	Specific	ABAKI_c01560
ABK_TSS0066	Scaf1	158826	+	1499.98	A	Specific	ABAKI_c01600
ABK_TSS0067	Scaf1	163178	+	199176	N	Conditional	N/A
ABK_TSS0068	Scaf1	168769	+	3269.38	P	Conserved	ABAKI_c01670
ABK_TSS0069	Scaf1	170402	+	9877.43	P	Conserved	ABAKI_c01690
ABK_TSS0070	Scaf1	171041	+	1278.93	P	Specific	ABAKI_c01710
ABK_TSS0071	Scaf1	172868	+	182.888	P	Specific	ABAKI_c01730
ABK_TSS0072	Scaf1	176278	+	154.694	P	Specific	ABAKI_c01790
ABK_TSS0073	Scaf1	181488	+	3.95366	N	Specific	N/A
ABK_TSS0074	Scaf1	184060	+	610.119	N	Conditional	N/A
ABK_TSS0075	Scaf1	187204	+	836.848	P	Conditional	ABAKI_c01870
ABK_TSS0076	Scaf1	188655	+	6352.84	P	Specific	ABAKI_c01900
ABK_TSS0077	Scaf1	196176	+	41.3194	S	Specific	ABAKI_c01960
ABK_TSS0078	Scaf1	196203	+	337.031	P	Specific	ABAKI_c01960
ABK_TSS0079	Scaf1	209026	+	297.492	P	Specific	ABAKI_c02080
ABK_TSS0080	Scaf1	293453	+	1227.07	P	Conditional	ABAKI_c02800
ABK_TSS0081	Scaf1	300980	+	71.247	P	Specific	ABAKI_c02880
ABK_TSS0082	Scaf1	307749	+	1413.15	S	Conditional	ABAKI_c02950
ABK_TSS0083	Scaf1	307790	+	2040.73	P	Specific	ABAKI_c02950
ABK_TSS0084	Scaf1	308141	+	1578.21	P	Conditional	ABAKI_c02960
ABK_TSS0085	Scaf1	309552	+	334.474	P	Specific	ABAKI_c02970
ABK_TSS0086	Scaf1	318235	+	2.5	A	Specific	ABAKI_c03050
ABK_TSS0087	Scaf1	330424	+	47.2687	P	Conditional	ABAKI_c03170
ABK_TSS0088	Scaf1	331707	+	1372.02	P	Conditional	ABAKI_c03180
ABK_TSS0089	Scaf1	344274	+	1918.64	P	Conditional	ABAKI_c03310
ABK_TSS0090	Scaf1	371992	+	298.345	N	Specific	N/A
ABK_TSS0091	Scaf1	377162	+	6706.47	P	Conserved	ABAKI_c03490
ABK_TSS0092	Scaf1	395861	+	79.6705	P	Conditional	ABAKI_c03680
ABK_TSS0093	Scaf1	402896	+	76.5407	P	Specific	ABAKI_c03740
ABK_TSS0094	Scaf1	406560	+	28.4664	P	Conserved	ABAKI_c03780
ABK_TSS0095	Scaf1	414412	+	11.6169	P	Specific	ABAKI_c03870
ABK_TSS0096	Scaf1	472846	+	504.752	N	Specific	N/A
ABK_TSS0097	Scaf1	492662	+	531.712	N	Specific	N/A
ABK_TSS0098	Scaf1	517473	+	294.867	A	Specific	ABAKI_c04850
ABK_TSS0099	Scaf1	517736	+	29.8046	A	Specific	ABAKI_c04850
ABK_TSS0100	Scaf1	521807	+	93.1739	P	Conditional	ABAKI_c04910
ABK_TSS0101	Scaf1	532211	+	11012.7	P	Conserved	ABAKI_c05010
ABK_TSS0102	Scaf1	533514	+	1315.33	P	Conditional	ABAKI_c05020
ABK_TSS0103	Scaf1	555793	+	47.0179	P	Specific	ABAKI_c05240
ABK_TSS0104	Scaf1	579288	+	62.451	P	Specific	ABAKI_c05440
ABK_TSS0105	Scaf1	587463	+	818.096	P	Specific	ABAKI_c05480
ABK_TSS0106	Scaf1	592955	+	173.802	P	Specific	ABAKI_c05560
ABK_TSS0107	Scaf1	622588	+	54446.8	P	Conserved	ABAKI_c05840
ABK_TSS0108	Scaf1	623282	+	1180.44	P	Conserved	ABAKI_c05860
ABK_TSS0109	Scaf1	650176	+	677.088	P	Conserved	ABAKI_c06100
ABK_TSS0110	Scaf1	789801	+	524.099	P	Conditional	ABAKI_c07530
ABK_TSS0111	Scaf1	805189	+	1153.75	P	Conditional	ABAKI_c07640
ABK_TSS0112	Scaf1	840172	+	142.146	P	Conditional	ABAKI_c07990
ABK_TSS0113	Scaf1	848753	+	57.6	P	Specific	ABAKI_c08120
ABK_TSS0114	Scaf1	854899	+	61.661	A	Specific	ABAKI_c08210
ABK_TSS0115	Scaf1	865160	+	48.7332	P	Specific	ABAKI_c08290
ABK_TSS0116	Scaf1	873487	+	1495.07	P	Conditional	ABAKI_c08350
ABK_TSS0117	Scaf1	909376	+	351.765	P	Conditional	ABAKI_c08670
ABK_TSS0118	Scaf1	965874	+	1508.96	P	Conditional	ABAKI_c09140
ABK_TSS0119	Scaf1	981530	+	2993.45	P	Conserved	ABAKI_c09300
ABK_TSS0120	Scaf1	991117	+	5.95437	P	Specific	ABAKI_c09380
ABK_TSS0121	Scaf1	1011989	+	93.8772	P	Conditional	ABAKI_c09610
ABK_TSS0122	Scaf1	1023046	+	1710.1	P	Conditional	ABAKI_c09740
ABK_TSS0123	Scaf1	1030581	+	624.24	P	Conditional	ABAKI_c09830
ABK_TSS0124	Scaf1	1051469	+	726.215	P	Conditional	ABAKI_c09990
ABK_TSS0125	Scaf1	1064436	+	56.8325	P	Specific	ABAKI_c10140
ABK_TSS0126	Scaf1	1086123	+	122.43	P	Conditional	ABAKI_c10400
ABK_TSS0127	Scaf1	1113214	+	3173.84	P	Conserved	ABAKI_c10670
ABK_TSS0128	Scaf1	1120273	+	32.5125	A	Specific	ABAKI_c10710
ABK_TSS0129	Scaf1	1184309	+	310.303	P	Conditional	ABAKI_c11310
ABK_TSS0130	Scaf1	1188990	+	1258.42	P	Conditional	ABAKI_c11400
ABK_TSS0131	Scaf1	1189428	+	2297.44	P	Conserved	ABAKI_c11410
ABK_TSS0132	Scaf1	1194984	+	179.781	P	Conditional	ABAKI_c11460
ABK_TSS0133	Scaf1	1201679	+	26.5057	P	Specific	ABAKI_c11600
ABK_TSS0134	Scaf1	1208095	+	128.709	P	Conditional	ABAKI_c11670
ABK_TSS0135	Scaf1	1209301	+	1532.23	P	Conditional	ABAKI_c11690
ABK_TSS0136	Scaf1	1227557	+	126.528	P	Specific	ABAKI_c11840
ABK_TSS0137	Scaf1	1228763	+	1496.84	P	Conditional	ABAKI_c11860
ABK_TSS0138	Scaf1	1316100	+	2379.15	P	Conditional	ABAKI_c12710
ABK_TSS0139	Scaf1	1319160	+	516.209	P	Conditional	ABAKI_c12740
ABK_TSS0140	Scaf1	1320261	+	6619.14	P	Conserved	ABAKI_c12750
ABK_TSS0141	Scaf1	1328820	+	12868.7	P	Conserved	ABAKI_c12850
ABK_TSS0142	Scaf1	1386562	+	1607.44	P	Conserved	ABAKI_c13410
ABK_TSS0143	Scaf1	1393414	+	4.52834	A	Specific	ABAKI_c13470
ABK_TSS0144	Scaf1	1441891	+	287.472	P	Conditional	ABAKI_c13960
ABK_TSS0145	Scaf1	1449923	+	20.6513	P	Specific	ABAKI_c14040
ABK_TSS0146	Scaf1	1454080	+	25.9921	P	Specific	ABAKI_c14110
ABK_TSS0147	Scaf1	1458523	+	260.663	P	Specific	ABAKI_c14170
ABK_TSS0148	Scaf1	1477004	+	767.341	P	Conditional	ABAKI_c14350
ABK_TSS0149	Scaf1	1483302	+	6286.73	P	Conserved	ABAKI_c14400
ABK_TSS0150	Scaf1	1504461	+	41.4177	A	Specific	ABAKI_c14580
ABK_TSS0151	Scaf1	1507910	+	16.6093	P	Specific	ABAKI_c14620
ABK_TSS0152	Scaf1	1509490	+	163.667	P	Specific	ABAKI_c14630
ABK_TSS0153	Scaf1	1511887	+	25.0906	P	Specific	ABAKI_c14660
ABK_TSS0154	Scaf1	1514624	+	497.508	P	Specific	ABAKI_c14690
ABK_TSS0155	Scaf1	1518027	+	11396.8	P	Conditional	ABAKI_c14720
ABK_TSS0156	Scaf1	1688860	+	2059.98	P	Conserved	ABAKI_c15990
ABK_TSS0157	Scaf1	1693037	+	120.865	P	Specific	ABAKI_c16030
ABK_TSS0158	Scaf1	1702713	+	53.5298	P	Specific	ABAKI_c16110
ABK_TSS0159	Scaf1	1709247	+	207.705	P	Conditional	ABAKI_c16170
ABK_TSS0160	Scaf1	1721437	+	47.8348	P	Specific	ABAKI_c16310
ABK_TSS0161	Scaf1	1731278	+	84.2465	P	Specific	ABAKI_c16430
ABK_TSS0162	Scaf1	1753008	+	1323.79	P	Conserved	ABAKI_c16660
ABK_TSS0163	Scaf1	1762490	+	9.91564	P	Specific	ABAKI_c16780
ABK_TSS0164	Scaf1	1769433	+	63.577	P	Conditional	ABAKI_c16880
ABK_TSS0165	Scaf1	1790401	+	33.6976	P	Specific	ABAKI_c17080
ABK_TSS0166	Scaf1	1796206	+	67.8553	P	Specific	ABAKI_c17130
ABK_TSS0167	Scaf1	1814855	+	220.306	P	Conditional	ABAKI_c17220
ABK_TSS0168	Scaf1	1862795	+	112.865	A	Specific	ABAKI_c17640
ABK_TSS0169	Scaf1	1863205	+	1344.61	P	Conditional	ABAKI_c17650
ABK_TSS0170	Scaf1	1890345	+	14.3853	P	Specific	ABAKI_c17920
ABK_TSS0171	Scaf1	1890712	+	5006.68	P	Conserved	ABAKI_c17930
ABK_TSS0172	Scaf1	1898292	+	9.30122	P	Conditional	ABAKI_c18000
ABK_TSS0173	Scaf1	1925392	+	29.2324	P	Specific	ABAKI_c18200
ABK_TSS0174	Scaf1	1993319	+	9.30122	S	Specific	ABAKI_c18760
ABK_TSS0175	Scaf1	1993420	+	40.9846	P	Specific	ABAKI_c18760
ABK_TSS0176	Scaf1	2018888	+	245.621	P	Conditional	ABAKI_c18950
ABK_TSS0177	Scaf1	2044848	+	725.956	P	Conditional	ABAKI_c19170
ABK_TSS0178	Scaf1	2045114	+	35.4757	S	Specific	ABAKI_c19170
ABK_TSS0179	Scaf1	2051281	+	266.747	P	Conditional	ABAKI_c19240
ABK_TSS0180	Scaf1	2053934	+	28542.5	P	Conserved	ABAKI_c19270
ABK_TSS0181	Scaf1	2057861	+	262.672	P	Conditional	ABAKI_c19310
ABK_TSS0182	Scaf1	2093048	+	689.204	P	Conditional	ABAKI_c19570
ABK_TSS0183	Scaf1	2094457	+	309.938	P	Specific	ABAKI_c19590
ABK_TSS0184	Scaf1	2105937	+	27738.7	P	Conserved	ABAKI_c19690
ABK_TSS0185	Scaf1	2112705	+	170.744	P	Specific	ABAKI_c19760
ABK_TSS0186	Scaf1	2114786	+	150.86	I	Specific	ABAKI_c19780
ABK_TSS0187	Scaf1	2116629	+	183.809	I	Specific	ABAKI_c19800
ABK_TSS0188	Scaf1	2117995	+	39.4666	S	Specific	ABAKI_c19830
ABK_TSS0189	Scaf1	2118040	+	9018.87	P	Conditional	ABAKI_c19830
ABK_TSS0190	Scaf1	2118282	+	139.518	P	Specific	ABAKI_c19840
ABK_TSS0191	Scaf1	2119206	+	1526.62	P	Conditional	ABAKI_c19860
ABK_TSS0192	Scaf1	2121928	+	130.706	P	Specific	ABAKI_c19880
ABK_TSS0193	Scaf1	2126142	+	391.383	P	Specific	ABAKI_c19920
ABK_TSS0194	Scaf1	2128793	+	2632.37	P	Conserved	ABAKI_c19940
ABK_TSS0195	Scaf1	2129238	+	95.0568	I	Conditional	ABAKI_c19940
ABK_TSS0196	Scaf1	2132169	+	736.379	P	Conditional	ABAKI_c19980
ABK_TSS0197	Scaf1	2133110	+	27950.4	P	Conserved	ABAKI_c19990
ABK_TSS0198	Scaf1	2133723	+	4152.05	P	Conserved	ABAKI_c20010
ABK_TSS0199	Scaf1	2134447	+	5492.95	P	Conserved	ABAKI_c20020
ABK_TSS0200	Scaf1	2137983	+	98.5034	P	Specific	ABAKI_c20050
ABK_TSS0201	Scaf1	2138605	+	23.3928	P	Specific	ABAKI_c20060
ABK_TSS0202	Scaf1	2140174	+	984.347	P	Specific	ABAKI_c20070
ABK_TSS0203	Scaf1	2142012	+	739.997	N	Specific	N/A
ABK_TSS0204	Scaf1	2159144	+	524.762	S	Conditional	ABAKI_c20230
ABK_TSS0205	Scaf1	2159155	+	3441.27	P	Specific	ABAKI_c20230
ABK_TSS0206	Scaf1	2162807	+	282.07	P	Specific	ABAKI_c20260
ABK_TSS0207	Scaf1	2164104	+	948.995	P	Conserved	ABAKI_c20270
ABK_TSS0208	Scaf1	2167556	+	1157.27	P	Conditional	ABAKI_c20310
ABK_TSS0209	Scaf1	2168101	+	1112.36	P	Specific	ABAKI_c20320
ABK_TSS0210	Scaf1	2169536	+	211.761	S	Conditional	ABAKI_c20340
ABK_TSS0211	Scaf1	2169590	+	307.142	P	Conditional	ABAKI_c20340
ABK_TSS0212	Scaf1	2172747	+	80.0984	P	Conditional	ABAKI_c20370
ABK_TSS0213	Scaf1	2177687	+	1450.15	P	Conditional	ABAKI_c20410
ABK_TSS0214	Scaf1	2200236	+	237.64	S	Conditional	ABAKI_c20510
ABK_TSS0215	Scaf1	2200252	+	695.743	P	Specific	ABAKI_c20510
ABK_TSS0216	Scaf1	2204704	+	113.098	P	Specific	ABAKI_c20550
ABK_TSS0217	Scaf1	2206772	+	280.405	N	Conditional	N/A
ABK_TSS0218	Scaf1	2207013	+	2473.27	P	Conditional	ABAKI_c20560
ABK_TSS0219	Scaf1	2222151	+	87.2575	P	Specific	ABAKI_c20730
ABK_TSS0220	Scaf1	2225840	+	21.6535	P	Specific	ABAKI_c20770
ABK_TSS0221	Scaf1	2226538	+	895.82	P	Conditional	ABAKI_c20780
ABK_TSS0222	Scaf1	2239157	+	3069.2	P	Conserved	ABAKI_c20850
ABK_TSS0223	Scaf1	2243493	+	10420.7	P	Conditional	ABAKI_c20900
ABK_TSS0224	Scaf1	2245664	+	518.344	P	Conditional	ABAKI_c20910
ABK_TSS0225	Scaf1	2245984	+	180.554	P	Specific	ABAKI_c20920
ABK_TSS0226	Scaf1	2247593	+	168.946	I	Specific	ABAKI_c20930
ABK_TSS0227	Scaf1	2269691	+	78.4093	S	Conditional	ABAKI_c21150
ABK_TSS0228	Scaf1	2269721	+	1129.5	P	Specific	ABAKI_c21150
ABK_TSS0229	Scaf1	2272710	+	246.252	P	Conditional	ABAKI_c21170
ABK_TSS0230	Scaf1	2275589	+	972.366	P	Conditional	ABAKI_c21200
ABK_TSS0231	Scaf1	2283808	+	26.8849	P	Specific	ABAKI_c21300
ABK_TSS0232	Scaf1	2286105	+	15.0211	P	Specific	ABAKI_c21340
ABK_TSS0233	Scaf1	2291266	+	407.924	P	Conditional	ABAKI_c21380
ABK_TSS0234	Scaf1	2299634	+	480.466	P	Conserved	ABAKI_c21470
ABK_TSS0235	Scaf1	2304288	+	901.612	S	Specific	ABAKI_c21490
ABK_TSS0236	Scaf1	2304323	+	1123.93	S	Specific	ABAKI_c21490
ABK_TSS0237	Scaf1	2304329	+	1289.45	P	Conditional	ABAKI_c21490
ABK_TSS0238	Scaf1	2308453	+	11.3903	P	Specific	ABAKI_c21530
ABK_TSS0239	Scaf1	2312251	+	239.083	P	Conditional	ABAKI_c21570
ABK_TSS0240	Scaf1	2312334	+	25.3034	S	Specific	ABAKI_c21570
ABK_TSS0241	Scaf1	2331399	+	229.644	P	Conditional	ABAKI_c21720
ABK_TSS0242	Scaf1	2332974	+	185.315	P	Specific	ABAKI_c21730
ABK_TSS0243	Scaf1	2336119	+	654.638	P	Conditional	ABAKI_c21770
ABK_TSS0244	Scaf1	2339330	+	91.9004	P	Specific	ABAKI_c21800
ABK_TSS0245	Scaf1	2344546	+	2152.77	P	Conditional	ABAKI_c21850
ABK_TSS0246	Scaf1	2348549	+	44099.1	N	Conserved	N/A
ABK_TSS0247	Scaf1	2350893	+	2426.82	P	Conditional	ABAKI_c21900
ABK_TSS0248	Scaf1	2352539	+	29.0519	P	Specific	ABAKI_c21920
ABK_TSS0249	Scaf1	2358865	+	1406.03	P	Conditional	ABAKI_c21980
ABK_TSS0250	Scaf1	2360658	+	93.5459	P	Specific	ABAKI_c21990
ABK_TSS0251	Scaf1	2364312	+	126.494	P	Specific	ABAKI_c22050
ABK_TSS0252	Scaf1	2365926	+	112.284	P	Specific	ABAKI_c22070
ABK_TSS0253	Scaf1	2376694	+	3.63462e+06	N	Conserved	N/A
ABK_TSS0254	Scaf1	2377152	+	59.209	P	Specific	ABAKI_c22170
ABK_TSS0255	Scaf1	2379429	+	92.1671	P	Specific	ABAKI_c22190
ABK_TSS0256	Scaf1	2381613	+	124.541	P	Specific	ABAKI_c22230
ABK_TSS0257	Scaf1	2383815	+	510.981	N	Conditional	N/A
ABK_TSS0258	Scaf1	2385919	+	5712.52	P	Conserved	ABAKI_c22260
ABK_TSS0259	Scaf1	2385948	+	530.389	S	Specific	ABAKI_c22260
ABK_TSS0260	Scaf1	2389852	+	2368.07	A	Conserved	ABAKI_c22280
ABK_TSS0261	Scaf1	2390275	+	1853.95	P	Conditional	ABAKI_c22290
ABK_TSS0262	Scaf1	2390377	+	393.589	S	Specific	ABAKI_c22290
ABK_TSS0263	Scaf1	2391562	+	74.2614	P	Specific	ABAKI_c22300
ABK_TSS0264	Scaf1	2392767	+	186.26	P	Specific	ABAKI_t00460
ABK_TSS0265	Scaf1	2395274	+	361.544	P	Conditional	ABAKI_c22330
ABK_TSS0266	Scaf1	2399906	+	77.4465	N	Specific	N/A
ABK_TSS0267	Scaf1	2401050	+	561.581	P	Conditional	ABAKI_c22400
ABK_TSS0268	Scaf1	2404335	+	1430.27	P	Conditional	ABAKI_c22440
ABK_TSS0269	Scaf1	2411767	+	420.683	P	Conditional	ABAKI_c22500
ABK_TSS0270	Scaf1	2416861	+	151.928	P	Specific	ABAKI_c22560
ABK_TSS0271	Scaf1	2421531	+	4342.09	P	Conditional	ABAKI_c22610
ABK_TSS0272	Scaf1	2422296	+	1239.4	N	Conditional	N/A
ABK_TSS0273	Scaf1	2429197	+	3559.22	P	Conserved	ABAKI_c22700
ABK_TSS0274	Scaf1	2434948	+	31.8023	P	Specific	ABAKI_c22730
ABK_TSS0275	Scaf1	2450780	+	2115.19	P	Conserved	ABAKI_c22870
ABK_TSS0276	Scaf1	2454702	+	735.987	P	Conserved	ABAKI_c22900
ABK_TSS0277	Scaf1	2459052	+	430.906	P	Conditional	ABAKI_c22940
ABK_TSS0278	Scaf1	2460386	+	672.272	P	Conditional	ABAKI_c22950
ABK_TSS0279	Scaf1	2464232	+	956.198	P	Conditional	ABAKI_c22990
ABK_TSS0280	Scaf1	2468351	+	17.506	A	Specific	ABAKI_c23010
ABK_TSS0281	Scaf1	2484163	+	2525.98	P	Specific	ABAKI_c23140
ABK_TSS0282	Scaf1	2486203	+	75526.9	P	Conditional	ABAKI_c23160
ABK_TSS0283	Scaf1	2490375	+	858.696	P	Specific	ABAKI_c23190
ABK_TSS0284	Scaf1	2491307	+	42.5878	P	Specific	ABAKI_c23200
ABK_TSS0285	Scaf1	2499143	+	157.051	P	Conditional	ABAKI_c23260
ABK_TSS0286	Scaf1	2508361	+	1068.37	P	Conditional	ABAKI_c23330
ABK_TSS0287	Scaf1	2512611	+	4328.55	P	Conserved	ABAKI_c23360
ABK_TSS0288	Scaf1	2513627	+	22909.6	P	Conserved	ABAKI_c23370
ABK_TSS0289	Scaf1	2514842	+	7610.16	P	Conditional	ABAKI_c23380
ABK_TSS0290	Scaf1	2517842	+	50.6287	N	Specific	N/A
ABK_TSS0291	Scaf1	2518772	+	885.978	I	Specific	ABAKI_c23400
ABK_TSS0292	Scaf1	2521234	+	181.454	P	Conserved	ABAKI_c23430
ABK_TSS0293	Scaf1	2522647	+	14182.3	P	Conditional	ABAKI_c23440
ABK_TSS0294	Scaf1	2528513	+	7067.11	P	Conserved	ABAKI_c23490
ABK_TSS0295	Scaf1	2528695	+	395.67	I	Specific	ABAKI_c23490
ABK_TSS0296	Scaf1	2534329	+	12874.4	P	Conserved	ABAKI_c23560
ABK_TSS0297	Scaf1	2535113	+	193.547	P	Conditional	ABAKI_c23580
ABK_TSS0298	Scaf1	2553278	+	640.697	P	Conditional	ABAKI_c23760
ABK_TSS0299	Scaf1	2557822	+	189.567	P	Conditional	ABAKI_c23810
ABK_TSS0300	Scaf1	2561767	+	1080.31	P	Conserved	ABAKI_c23830
ABK_TSS0301	Scaf1	2563759	+	71.0364	S	Specific	ABAKI_c23850
ABK_TSS0302	Scaf1	2563809	+	138.886	P	Specific	ABAKI_c23850
ABK_TSS0303	Scaf1	2567681	+	1897.92	P	Conditional	ABAKI_c23870
ABK_TSS0304	Scaf1	2567710	+	73.99	S	Specific	ABAKI_c23870
ABK_TSS0305	Scaf1	2568583	+	364.637	P	Specific	ABAKI_c23880
ABK_TSS0306	Scaf1	2574703	+	488.113	P	Conditional	ABAKI_c23920
ABK_TSS0307	Scaf1	2581141	+	636.424	P	Conditional	ABAKI_c23960
ABK_TSS0308	Scaf1	2584004	+	13962	P	Conserved	ABAKI_c23990
ABK_TSS0309	Scaf1	2586299	+	313.262	P	Conditional	ABAKI_c24020
ABK_TSS0310	Scaf1	2590936	+	4292.38	P	Conserved	ABAKI_c24050
ABK_TSS0311	Scaf1	2594240	+	1049.06	N	Conserved	N/A
ABK_TSS0312	Scaf1	2599456	+	372.045	P	Conditional	ABAKI_c24120
ABK_TSS0313	Scaf1	2600452	+	256954	P	Conserved	ABAKI_c24130
ABK_TSS0314	Scaf1	2600853	+	4577.75	P	Conserved	ABAKI_c24140
ABK_TSS0315	Scaf1	2602271	+	593.227	P	Specific	ABAKI_c24150
ABK_TSS0316	Scaf1	2606897	+	1348.25	N	Specific	N/A
ABK_TSS0317	Scaf1	2617381	+	238.255	P	Conditional	ABAKI_c24270
ABK_TSS0318	Scaf1	2618532	+	2518.19	P	Conditional	ABAKI_c24280
ABK_TSS0319	Scaf1	2631382	+	1220.34	P	Conditional	ABAKI_c24380
ABK_TSS0320	Scaf1	2633566	+	1552.21	P	Specific	ABAKI_c24390
ABK_TSS0321	Scaf1	2634116	+	4227.59	P	Specific	ABAKI_c24400
ABK_TSS0322	Scaf1	2637117	+	87.2862	P	Specific	ABAKI_c24430
ABK_TSS0323	Scaf1	2640812	+	49746.3	P	Conserved	ABAKI_c24460
ABK_TSS0324	Scaf1	2643318	+	1273.33	P	Conditional	ABAKI_c24490
ABK_TSS0325	Scaf1	2650997	+	4836.21	P	Conditional	ABAKI_c24510
ABK_TSS0326	Scaf1	2655923	+	669.025	P	Conserved	ABAKI_c24560
ABK_TSS0327	Scaf1	2679529	+	1975.93	P	Conditional	ABAKI_c24780
ABK_TSS0328	Scaf1	2680710	+	48399.9	N	Conditional	N/A
ABK_TSS0329	Scaf1	2681173	+	516.78	P	Conditional	ABAKI_c24790
ABK_TSS0330	Scaf1	2684423	+	433.68	P	Specific	ABAKI_c24820
ABK_TSS0331	Scaf1	2687229	+	373.002	P	Specific	ABAKI_c24840
ABK_TSS0332	Scaf1	2688361	+	917.796	P	Conditional	ABAKI_c24850
ABK_TSS0333	Scaf1	2689532	+	309.598	P	Specific	ABAKI_c24860
ABK_TSS0334	Scaf1	2697285	+	258.444	P	Conditional	ABAKI_c24920
ABK_TSS0335	Scaf1	2699453	+	107.553	N	Specific	N/A
ABK_TSS0336	Scaf1	2699662	+	1538.03	P	Conserved	ABAKI_r00030
ABK_TSS0337	Scaf1	2699691	+	89.3367	S	Specific	ABAKI_r00030
ABK_TSS0338	Scaf1	2704556	+	228.708	S	Specific	ABAKI_r00010
ABK_TSS0339	Scaf1	2708052	+	118.446	P	Specific	ABAKI_c24980
ABK_TSS0340	Scaf1	2709487	+	1523.67	S	Conserved	ABAKI_r00030
ABK_TSS0341	Scaf1	2709516	+	85.8644	S	Specific	ABAKI_r00030
ABK_TSS0342	Scaf1	2714258	+	223.139	S	Conditional	ABAKI_r00010
ABK_TSS0343	Scaf1	2718305	+	2641.09	P	Conditional	ABAKI_c25020
ABK_TSS0344	Scaf1	2718859	+	36.0876	S	Specific	ABAKI_r00030
ABK_TSS0345	Scaf1	2718955	+	1510.74	S	Conserved	ABAKI_r00030
ABK_TSS0346	Scaf1	2718984	+	81.8722	S	Specific	ABAKI_r00030
ABK_TSS0347	Scaf1	2724383	+	523.06	P	Specific	ABAKI_r00010
ABK_TSS0348	Scaf1	2725590	+	17.6865	P	Specific	ABAKI_t00570
ABK_TSS0349	Scaf1	2726036	+	21943.5	P	Conserved	ABAKI_c25030
ABK_TSS0350	Scaf1	2728837	+	119.264	P	Specific	ABAKI_c25040
ABK_TSS0351	Scaf1	2733958	+	359.459	P	Conditional	ABAKI_c25100
ABK_TSS0352	Scaf1	2736261	+	42.4295	P	Specific	ABAKI_c25130
ABK_TSS0353	Scaf1	2737515	+	435.082	P	Specific	ABAKI_c25140
ABK_TSS0354	Scaf1	2744281	+	528.782	I	Specific	ABAKI_c25200
ABK_TSS0355	Scaf1	2745325	+	4385.91	P	Conserved	ABAKI_c25210
ABK_TSS0356	Scaf1	2746356	+	352.615	P	Conditional	ABAKI_c25220
ABK_TSS0357	Scaf1	2747590	+	169.045	P	Specific	ABAKI_c25240
ABK_TSS0358	Scaf1	2749385	+	97.2674	P	Specific	ABAKI_c25270
ABK_TSS0359	Scaf1	2771908	+	706.185	P	Conditional	ABAKI_c25630
ABK_TSS0360	Scaf1	2775784	+	5883.48	P	Conserved	ABAKI_c25660
ABK_TSS0361	Scaf1	2777905	+	3670	P	Specific	ABAKI_c25680
ABK_TSS0362	Scaf1	2782250	+	372.443	P	Conditional	ABAKI_c25710
ABK_TSS0363	Scaf1	2787094	+	116.265	N	Conditional	N/A
ABK_TSS0364	Scaf1	2787409	+	3017.77	P	Conserved	ABAKI_c25750
ABK_TSS0365	Scaf1	2788160	+	2077.27	P	Conditional	ABAKI_c25760
ABK_TSS0366	Scaf1	2789293	+	863.381	I	Specific	ABAKI_c25760
ABK_TSS0367	Scaf1	2789986	+	8569.49	P	Conditional	ABAKI_c25770
ABK_TSS0368	Scaf1	2790052	+	390.573	S	Specific	ABAKI_c25770
ABK_TSS0369	Scaf1	2796098	+	442.18	P	Specific	ABAKI_c25820
ABK_TSS0370	Scaf1	2800494	+	247.964	P	Conserved	ABAKI_c25840
ABK_TSS0371	Scaf1	2802729	+	159.064	P	Specific	ABAKI_c25860
ABK_TSS0372	Scaf1	2813101	+	732.284	P	Conditional	ABAKI_c25960
ABK_TSS0373	Scaf1	2820723	+	286.697	S	Specific	ABAKI_c26020
ABK_TSS0374	Scaf1	2820767	+	3273.52	P	Specific	ABAKI_c26020
ABK_TSS0375	Scaf1	2826976	+	84.1465	P	Specific	ABAKI_c26070
ABK_TSS0376	Scaf1	2839309	+	2249.37	P	Conditional	ABAKI_c26180
ABK_TSS0377	Scaf1	2840852	+	18161.5	P	Conserved	ABAKI_c26200
ABK_TSS0378	Scaf1	2843241	+	2585.76	P	Conditional	ABAKI_c26230
ABK_TSS0379	Scaf1	2853518	+	517.191	A	Conditional	ABAKI_c26290
ABK_TSS0380	Scaf1	2854130	+	107.302	P	Specific	ABAKI_c26300
ABK_TSS0381	Scaf1	2855956	+	1502.28	P	Conditional	ABAKI_c26320
ABK_TSS0382	Scaf1	2857492	+	4454.05	P	Conditional	ABAKI_c26330
ABK_TSS0383	Scaf1	2858962	+	3920.24	P	Conserved	ABAKI_c26340
ABK_TSS0384	Scaf1	2861993	+	23.2525	S	Specific	ABAKI_c26370
ABK_TSS0385	Scaf1	2862045	+	578.031	P	Specific	ABAKI_c26370
ABK_TSS0386	Scaf1	2863575	+	1187.56	P	Conditional	ABAKI_c26380
ABK_TSS0387	Scaf1	2868550	+	4243.52	P	Conserved	ABAKI_c26400
ABK_TSS0388	Scaf1	2872103	+	121.944	A	Conditional	ABAKI_c26440
ABK_TSS0389	Scaf1	2879534	+	1124.38	P	Conditional	ABAKI_c26510
ABK_TSS0390	Scaf1	2881914	+	149.724	S	Specific	ABAKI_c26530
ABK_TSS0391	Scaf1	2881934	+	613.392	P	Specific	ABAKI_c26530
ABK_TSS0392	Scaf1	2887371	+	735.472	P	Conditional	ABAKI_c26570
ABK_TSS0393	Scaf1	2889791	+	55.52	P	Specific	ABAKI_c26590
ABK_TSS0394	Scaf1	2892182	+	1456.69	P	Conditional	ABAKI_c26610
ABK_TSS0395	Scaf1	2894606	+	358.323	P	Conditional	ABAKI_c26630
ABK_TSS0396	Scaf1	2895831	+	4313.28	P	Conditional	ABAKI_c26640
ABK_TSS0397	Scaf1	2899280	+	1056.02	P	Conditional	ABAKI_c26660
ABK_TSS0398	Scaf1	2900598	+	63.1997	P	Conditional	ABAKI_c26670
ABK_TSS0399	Scaf1	2903325	+	8904.57	P	Conserved	ABAKI_c26690
ABK_TSS0400	Scaf1	2904479	+	399.37	P	Specific	ABAKI_c26700
ABK_TSS0401	Scaf1	2906183	+	184.053	P	Conditional	ABAKI_c26710
ABK_TSS0402	Scaf1	2917151	+	10722.8	P	Conserved	ABAKI_c26780
ABK_TSS0403	Scaf1	2917281	+	2370.34	S	Conditional	ABAKI_c26780
ABK_TSS0404	Scaf1	2939234	+	48.4787	P	Specific	ABAKI_c26940
ABK_TSS0405	Scaf1	2940057	+	104.917	P	Specific	ABAKI_c26950
ABK_TSS0406	Scaf1	2942487	+	382.147	P	Conditional	ABAKI_c26970
ABK_TSS0407	Scaf1	2943858	+	932.261	N	Conditional	N/A
ABK_TSS0408	Scaf1	2951657	+	492.634	P	Specific	ABAKI_c27040
ABK_TSS0409	Scaf1	2951687	+	136.856	S	Specific	ABAKI_c27040
ABK_TSS0410	Scaf1	2953406	+	109.166	P	Specific	ABAKI_c27050
ABK_TSS0411	Scaf1	2955256	+	3200.41	P	Conditional	ABAKI_c27060
ABK_TSS0412	Scaf1	2965901	+	380.642	P	Conditional	ABAKI_c27160
ABK_TSS0413	Scaf1	2971271	+	627	P	Conditional	ABAKI_c27210
ABK_TSS0414	Scaf1	2973141	+	1345.19	P	Conserved	ABAKI_c27250
ABK_TSS0415	Scaf1	2973430	+	595.3	P	Specific	ABAKI_c27260
ABK_TSS0416	Scaf1	2976565	+	61.6215	S	Specific	ABAKI_c27280
ABK_TSS0417	Scaf1	2976791	+	698.451	P	Conditional	ABAKI_c27280
ABK_TSS0418	Scaf1	2980232	+	8939.59	P	Conserved	ABAKI_c27320
ABK_TSS0419	Scaf1	2991444	+	7297.09	P	Conserved	ABAKI_c27400
ABK_TSS0420	Scaf1	2999021	+	696.193	P	Conditional	ABAKI_c27490
ABK_TSS0421	Scaf1	3000185	+	69.4748	P	Specific	ABAKI_c27500
ABK_TSS0422	Scaf1	3003078	+	134.02	A	Conditional	ABAKI_c27520
ABK_TSS0423	Scaf1	3008809	+	359.249	P	Conditional	ABAKI_c27600
ABK_TSS0424	Scaf1	3009790	+	213.9	P	Conditional	ABAKI_c27610
ABK_TSS0425	Scaf1	3009823	+	120	S	Specific	ABAKI_c27610
ABK_TSS0426	Scaf1	3010585	+	113.615	P	Specific	ABAKI_c27620
ABK_TSS0427	Scaf1	3012119	+	233.619	P	Conditional	ABAKI_c27640
ABK_TSS0428	Scaf1	3014100	+	951.382	P	Conditional	ABAKI_c27650
ABK_TSS0429	Scaf1	3020485	+	6160.24	P	Conditional	ABAKI_c27680
ABK_TSS0430	Scaf1	3023533	+	7939.2	P	Conserved	ABAKI_c27710
ABK_TSS0431	Scaf1	3026142	+	71470.1	P	Conserved	ABAKI_c27730
ABK_TSS0432	Scaf1	3029475	+	501.672	P	Conditional	ABAKI_c27760
ABK_TSS0433	Scaf1	3039558	+	2542.99	P	Conserved	ABAKI_c27830
ABK_TSS0434	Scaf1	3041155	+	611.264	P	Conditional	ABAKI_c27850
ABK_TSS0435	Scaf1	3044729	+	1571.91	P	Conserved	ABAKI_c27880
ABK_TSS0436	Scaf1	3046101	+	123.042	P	Specific	ABAKI_c27900
ABK_TSS0437	Scaf1	3049236	+	13.2375	N	Specific	N/A
ABK_TSS0438	Scaf1	3058717	+	9679.73	P	Conserved	ABAKI_c28080
ABK_TSS0439	Scaf1	3062703	+	29.9735	P	Specific	ABAKI_c28100
ABK_TSS0440	Scaf1	3064085	+	377.021	P	Conditional	ABAKI_c28110
ABK_TSS0441	Scaf1	3066047	+	33.9888	P	Specific	ABAKI_c28130
ABK_TSS0442	Scaf1	3079084	+	2386.93	P	Specific	ABAKI_c28230
ABK_TSS0443	Scaf1	3080731	+	1143.3	P	Conditional	ABAKI_c28250
ABK_TSS0444	Scaf1	3088910	+	104.245	P	Conditional	ABAKI_c28350
ABK_TSS0445	Scaf1	3092997	+	186.733	P	Specific	ABAKI_c28380
ABK_TSS0446	Scaf1	3106134	+	80.2417	P	Specific	ABAKI_c28530
ABK_TSS0447	Scaf1	3115980	+	120.251	P	Specific	ABAKI_c28620
ABK_TSS0448	Scaf1	3118979	+	1022.27	P	Conditional	ABAKI_c28640
ABK_TSS0449	Scaf1	3121301	+	3401.97	P	Conserved	ABAKI_c28660
ABK_TSS0450	Scaf1	3132201	+	156.926	P	Conditional	ABAKI_c28750
ABK_TSS0451	Scaf1	3134188	+	1063.11	P	Conserved	ABAKI_c28760
ABK_TSS0452	Scaf1	3135460	+	345.063	P	Conditional	ABAKI_c28770
ABK_TSS0453	Scaf1	3138578	+	128.781	P	Specific	ABAKI_c28800
ABK_TSS0454	Scaf1	3138902	+	201.764	P	Conditional	ABAKI_c28810
ABK_TSS0455	Scaf1	3146991	+	203.756	P	Conditional	ABAKI_c28900
ABK_TSS0456	Scaf1	3156392	+	7.38875	A	Specific	ABAKI_c28970
ABK_TSS0457	Scaf1	3159898	+	9.35714	N	Specific	N/A
ABK_TSS0458	Scaf1	3160773	+	270.663	P	Conserved	ABAKI_c29020
ABK_TSS0459	Scaf1	3161568	+	2343.28	P	Conserved	ABAKI_c29030
ABK_TSS0460	Scaf1	3164238	+	4825.75	P	Conditional	ABAKI_c29040
ABK_TSS0461	Scaf1	3175043	+	202.174	P	Specific	ABAKI_c29150
ABK_TSS0462	Scaf1	3176267	+	230.005	P	Specific	ABAKI_c29160
ABK_TSS0463	Scaf1	3180480	+	1414.97	P	Conserved	ABAKI_c29200
ABK_TSS0464	Scaf1	3182494	+	314.639	I	Specific	ABAKI_c29220
ABK_TSS0465	Scaf1	3185607	+	57.0476	P	Specific	ABAKI_c29260
ABK_TSS0466	Scaf1	3187728	+	520.513	P	Conditional	ABAKI_c29290
ABK_TSS0467	Scaf1	3189137	+	465.123	P	Conditional	ABAKI_c29310
ABK_TSS0468	Scaf1	3192339	+	5068.31	P	Conserved	ABAKI_c29330
ABK_TSS0469	Scaf1	3196512	+	357.851	P	Specific	ABAKI_c29360
ABK_TSS0470	Scaf1	3198855	+	2330.93	P	Conserved	ABAKI_c29390
ABK_TSS0471	Scaf1	3204151	+	4389.41	S	Conditional	ABAKI_c29450
ABK_TSS0472	Scaf1	3204172	+	8245.61	P	Specific	ABAKI_c29450
ABK_TSS0473	Scaf1	3204943	+	131.006	P	Specific	ABAKI_c29460
ABK_TSS0474	Scaf1	3205813	+	4661.92	P	Specific	ABAKI_c29470
ABK_TSS0475	Scaf1	3212580	+	48596.5	P	Conserved	ABAKI_c29530
ABK_TSS0476	Scaf1	3217371	+	18264.5	P	Conditional	ABAKI_c29580
ABK_TSS0477	Scaf1	3218641	+	442.608	P	Specific	ABAKI_c29590
ABK_TSS0478	Scaf1	3224994	+	374.338	P	Conditional	ABAKI_c29640
ABK_TSS0479	Scaf1	3228874	+	510.776	P	Conditional	ABAKI_c29670
ABK_TSS0480	Scaf1	3230986	+	371.427	P	Conditional	ABAKI_c29680
ABK_TSS0481	Scaf1	3236534	+	6705.91	P	Conserved	ABAKI_c29730
ABK_TSS0482	Scaf1	3240834	+	2523.6	P	Conditional	ABAKI_c29770
ABK_TSS0483	Scaf1	3245800	+	1240.73	P	Conditional	ABAKI_c29820
ABK_TSS0484	Scaf1	3251671	+	217.743	P	Specific	ABAKI_c29880
ABK_TSS0485	Scaf1	3254045	+	1989.14	P	Conserved	ABAKI_c29900
ABK_TSS0486	Scaf1	3264265	+	625.033	P	Conditional	ABAKI_c30000
ABK_TSS0487	Scaf1	3266080	+	1057.63	P	Conditional	ABAKI_c30030
ABK_TSS0488	Scaf1	3267486	+	1756.26	P	Conditional	ABAKI_c30040
ABK_TSS0489	Scaf1	3269892	+	812.964	P	Conditional	ABAKI_c30060
ABK_TSS0490	Scaf1	3287426	+	781.962	P	Conditional	ABAKI_c30140
ABK_TSS0491	Scaf1	3287671	+	801.587	I	Specific	ABAKI_c30140
ABK_TSS0492	Scaf1	3292637	+	2750.17	P	Conditional	ABAKI_c30170
ABK_TSS0493	Scaf1	3293540	+	243.273	P	Conditional	ABAKI_c30180
ABK_TSS0494	Scaf1	3295667	+	5874.2	N	Conserved	N/A
ABK_TSS0495	Scaf1	3302464	+	46.5232	P	Specific	ABAKI_c30270
ABK_TSS0496	Scaf1	3303088	+	21100.6	P	Conserved	ABAKI_c30280
ABK_TSS0497	Scaf1	3308762	+	14.6719	I	Specific	ABAKI_c30350
ABK_TSS0498	Scaf1	3310623	+	144.75	P	Specific	ABAKI_c30380
ABK_TSS0499	Scaf1	3312471	+	182.837	P	Specific	ABAKI_c30390
ABK_TSS0500	Scaf1	3315820	+	374.477	P	Conditional	ABAKI_c30430
ABK_TSS0501	Scaf1	3326277	+	1248.2	P	Conditional	ABAKI_c30490
ABK_TSS0502	Scaf1	3328988	+	408.128	P	Conditional	ABAKI_c30500
ABK_TSS0503	Scaf1	3335081	+	174.861	P	Conditional	ABAKI_c30560
ABK_TSS0504	Scaf1	3337874	+	6639.02	P	Conserved	ABAKI_c30580
ABK_TSS0505	Scaf1	3341190	+	5.10302	P	Conditional	ABAKI_c30620
ABK_TSS0506	Scaf1	3356892	+	3429.23	P	Conditional	ABAKI_c30740
ABK_TSS0507	Scaf1	3357452	+	441.229	P	Conserved	ABAKI_c30750
ABK_TSS0508	Scaf1	3364310	+	510.257	P	Conditional	ABAKI_c30830
ABK_TSS0509	Scaf1	3372640	+	360.663	P	Conditional	ABAKI_c30880
ABK_TSS0510	Scaf1	3377878	+	139.917	P	Specific	ABAKI_c30920
ABK_TSS0511	Scaf1	3385656	+	977.157	P	Conditional	ABAKI_c31000
ABK_TSS0512	Scaf1	3387081	+	232.545	P	Specific	ABAKI_c31010
ABK_TSS0513	Scaf1	3389961	+	769.904	P	Conditional	ABAKI_c31050
ABK_TSS0514	Scaf1	3391812	+	21.6539	P	Specific	ABAKI_c31070
ABK_TSS0515	Scaf1	3398151	+	24.0231	P	Specific	ABAKI_c31110
ABK_TSS0516	Scaf1	3401481	+	1471.34	P	Specific	ABAKI_c31140
ABK_TSS0517	Scaf1	3402276	+	2852.3	P	Conditional	ABAKI_c31160
ABK_TSS0518	Scaf1	3406697	+	9421.99	P	Conserved	ABAKI_c31200
ABK_TSS0519	Scaf1	3407917	+	644.342	N	Specific	N/A
ABK_TSS0520	Scaf1	3420364	+	258.183	P	Specific	ABAKI_c31260
ABK_TSS0521	Scaf1	3426660	+	8949.94	P	Conditional	ABAKI_c31350
ABK_TSS0522	Scaf1	3434046	+	232.535	P	Conditional	ABAKI_c31460
ABK_TSS0523	Scaf1	3458005	+	80.5585	P	Specific	ABAKI_c31670
ABK_TSS0524	Scaf1	3459622	+	319.169	P	Conditional	ABAKI_c31690
ABK_TSS0525	Scaf1	3460196	+	92.0192	P	Specific	ABAKI_c31700
ABK_TSS0526	Scaf1	3476372	+	330.454	P	Conditional	ABAKI_c31890
ABK_TSS0527	Scaf1	3476946	+	95.85	P	Specific	ABAKI_c31900
ABK_TSS0528	Scaf1	3479885	+	33.0556	I	Specific	ABAKI_c31930
ABK_TSS0529	Scaf1	3487290	+	525.058	P	Conditional	ABAKI_c32030
ABK_TSS0530	Scaf1	3491800	+	57.4907	P	Specific	ABAKI_c32070
ABK_TSS0531	Scaf1	3502106	+	130.747	P	Conditional	ABAKI_c32180
ABK_TSS0532	Scaf1	3506558	+	39.5723	P	Specific	ABAKI_c32220
ABK_TSS0533	Scaf1	3507409	+	67.3012	P	Specific	ABAKI_c32240
ABK_TSS0534	Scaf1	3509103	+	3254.71	P	Conditional	ABAKI_c32260
ABK_TSS0535	Scaf1	3524171	+	1044.41	P	Conditional	ABAKI_c32390
ABK_TSS0536	Scaf1	3530497	+	73.0123	P	Conditional	ABAKI_c32440
ABK_TSS0537	Scaf1	3536795	+	515.758	P	Conditional	ABAKI_c32500
ABK_TSS0538	Scaf1	3537723	+	2.5	P	Conditional	ABAKI_c32510
ABK_TSS0539	Scaf1	3541659	+	299.37	P	Conditional	ABAKI_c32530
ABK_TSS0540	Scaf1	3545897	+	348.391	P	Conditional	ABAKI_c32560
ABK_TSS0541	Scaf1	3547345	+	515.644	I	Specific	ABAKI_c32570
ABK_TSS0542	Scaf1	3548040	+	34474.8	P	Conserved	ABAKI_c32590
ABK_TSS0543	Scaf1	3551842	+	347.399	S	Conditional	ABAKI_c32610
ABK_TSS0544	Scaf1	3551939	+	443.54	P	Conditional	ABAKI_c32610
ABK_TSS0545	Scaf1	3553666	+	18050	P	Conserved	ABAKI_c32630
ABK_TSS0546	Scaf1	3561618	+	1945.68	P	Conditional	ABAKI_c32690
ABK_TSS0547	Scaf1	3575686	+	1570.35	P	Conditional	ABAKI_c32750
ABK_TSS0548	Scaf1	3589232	+	21.0237	P	Specific	ABAKI_c32850
ABK_TSS0549	Scaf1	3592066	+	2655.84	P	Conserved	ABAKI_c32880
ABK_TSS0550	Scaf1	3592766	+	390.622	P	Specific	ABAKI_c32890
ABK_TSS0551	Scaf1	3595967	+	120.871	P	Specific	ABAKI_c32900
ABK_TSS0552	Scaf1	3603119	+	2758.49	P	Conditional	ABAKI_c33010
ABK_TSS0553	Scaf1	3607369	+	4455.71	P	Conserved	ABAKI_c33050
ABK_TSS0554	Scaf1	3624199	+	464.428	P	Conditional	ABAKI_c33210
ABK_TSS0555	Scaf1	3629825	+	9374.06	P	Conditional	ABAKI_c33260
ABK_TSS0556	Scaf1	3630682	+	87.3263	P	Specific	ABAKI_c33270
ABK_TSS0557	Scaf1	3631479	+	18291.7	P	Conserved	ABAKI_c33280
ABK_TSS0558	Scaf1	3635445	+	89.9325	P	Conserved	ABAKI_c33330
ABK_TSS0559	Scaf1	3645848	+	1986.81	P	Conditional	ABAKI_c33400
ABK_TSS0560	Scaf1	3646653	+	285.349	P	Conditional	ABAKI_c33410
ABK_TSS0561	Scaf1	3649630	+	52.0245	P	Specific	ABAKI_c33420
ABK_TSS0562	Scaf1	3651199	+	235.857	P	Conditional	ABAKI_c33440
ABK_TSS0563	Scaf1	3652156	+	21.3463	P	Specific	ABAKI_c33450
ABK_TSS0564	Scaf1	3653439	+	5681.4	P	Conditional	ABAKI_c33460
ABK_TSS0565	Scaf1	3656260	+	35.3134	A	Specific	ABAKI_c33490
ABK_TSS0566	Scaf1	3656625	+	38.595	P	Specific	ABAKI_c33500
ABK_TSS0567	Scaf1	3660400	+	106.377	S	Conditional	ABAKI_c33530
ABK_TSS0568	Scaf1	3660448	+	1017.94	P	Specific	ABAKI_c33530
ABK_TSS0569	Scaf1	3661975	+	10.2325	P	Specific	ABAKI_c33550
ABK_TSS0570	Scaf1	3663002	+	1744.63	P	Conditional	ABAKI_c33560
ABK_TSS0571	Scaf1	3669933	+	87561.6	N	Conditional	N/A
ABK_TSS0572	Scaf1	3671438	+	3424.28	P	Conserved	ABAKI_c33640
ABK_TSS0573	Scaf1	3671540	+	157.849	S	Specific	ABAKI_c33640
ABK_TSS0574	Scaf1	3679015	+	309.272	P	Specific	ABAKI_c33690
ABK_TSS0575	Scaf1	3679802	+	111.993	P	Specific	ABAKI_c33700
ABK_TSS0576	Scaf1	3683849	+	3434.83	P	Conserved	ABAKI_c33730
ABK_TSS0577	Scaf1	3695408	+	3406.72	P	Conserved	ABAKI_c33830
ABK_TSS0578	Scaf1	3701785	+	555.094	P	Conserved	ABAKI_c33890
ABK_TSS0579	Scaf1	3706606	+	2041.31	P	Conditional	ABAKI_c33930
ABK_TSS0580	Scaf1	3710184	+	1092.08	P	Conditional	ABAKI_c33960
ABK_TSS0581	Scaf1	3716592	+	1414.39	P	Conditional	ABAKI_c34010
ABK_TSS0582	Scaf1	3719139	+	1065.52	P	Conditional	ABAKI_c34030
ABK_TSS0583	Scaf1	3719855	+	342.076	P	Specific	ABAKI_c34040
ABK_TSS0584	Scaf1	3724625	+	53861.5	P	Conserved	ABAKI_c34100
ABK_TSS0585	Scaf1	3727608	+	5500.25	P	Conditional	ABAKI_c34120
ABK_TSS0586	Scaf1	3728322	+	1898.22	P	Conserved	ABAKI_c34130
ABK_TSS0587	Scaf1	3728919	+	32.6157	P	Specific	ABAKI_c34140
ABK_TSS0588	Scaf1	3732872	+	1845.08	P	Conserved	ABAKI_c34170
ABK_TSS0589	Scaf1	3733441	+	323.784	P	Specific	ABAKI_c34180
ABK_TSS0590	Scaf1	3736810	+	2296.34	P	Conditional	ABAKI_c34210
ABK_TSS0591	Scaf1	3737565	+	258.332	I	Specific	ABAKI_c34210
ABK_TSS0592	Scaf1	3742205	+	187473	P	Conserved	ABAKI_c34250
ABK_TSS0593	Scaf1	3742644	+	16.0966	P	Specific	ABAKI_c34260
ABK_TSS0594	Scaf1	3744520	+	8706.69	P	Conditional	ABAKI_c34280
ABK_TSS0595	Scaf1	3746031	+	9167.83	P	Conditional	ABAKI_c34300
ABK_TSS0596	Scaf1	3751885	+	178.343	P	Specific	ABAKI_c34350
ABK_TSS0597	Scaf1	3762765	+	2944.36	P	Conditional	ABAKI_c34400
ABK_TSS0598	Scaf1	3763986	+	68.1245	P	Specific	ABAKI_c34410
ABK_TSS0599	Scaf1	3786879	+	103.254	P	Specific	ABAKI_c34650
ABK_TSS0600	Scaf1	3789383	+	217.474	P	Specific	ABAKI_c34670
ABK_TSS0601	Scaf1	3792022	+	6318.45	P	Conditional	ABAKI_c34680
ABK_TSS0602	Scaf1	3796399	+	3334.57	P	Conserved	ABAKI_c34710
ABK_TSS0603	Scaf1	3796990	+	9.09029	P	Specific	ABAKI_c34720
ABK_TSS0604	Scaf1	3800665	+	2823.93	P	Conditional	ABAKI_c34740
ABK_TSS0605	Scaf1	3801796	+	511.387	P	Specific	ABAKI_c34760
ABK_TSS0606	Scaf1	3827622	+	1028.52	P	Conditional	ABAKI_c34990
ABK_TSS0607	Scaf1	3830168	+	1633.65	P	Conditional	ABAKI_c35020
ABK_TSS0608	Scaf1	3831955	+	42.9505	P	Specific	ABAKI_c35040
ABK_TSS0609	Scaf1	3833799	+	46198.7	N	Conditional	N/A
ABK_TSS0610	Scaf1	3834873	+	19.5684	P	Specific	ABAKI_c35050
ABK_TSS0611	Scaf1	3836490	+	5239.7	P	Conditional	ABAKI_c35060
ABK_TSS0612	Scaf1	3839307	+	27.7664	P	Specific	ABAKI_c35100
ABK_TSS0613	Scaf1	3846358	+	6367.95	P	Conserved	ABAKI_c35170
ABK_TSS0614	Scaf1	3847518	+	427.531	P	Specific	ABAKI_c35180
ABK_TSS0615	Scaf1	3849215	+	485.02	P	Specific	ABAKI_c35200
ABK_TSS0616	Scaf1	3850444	+	32.958	P	Specific	ABAKI_c35210
ABK_TSS0617	Scaf1	3859407	+	2519.07	P	Conditional	ABAKI_c35310
ABK_TSS0618	Scaf1	3864159	+	2518.62	P	Conserved	ABAKI_c35350
ABK_TSS0619	Scaf1	3865444	+	304.378	P	Specific	ABAKI_c35360
ABK_TSS0620	Scaf1	3874740	+	936.756	P	Specific	ABAKI_c35450
ABK_TSS0621	Scaf1	3876497	+	15997	P	Conserved	ABAKI_c35490
ABK_TSS0622	Scaf1	3880313	+	108.33	P	Specific	ABAKI_c35550
ABK_TSS0623	Scaf1	3881365	+	431.632	P	Conditional	ABAKI_c35560
ABK_TSS0624	Scaf1	3894748	+	306.434	P	Conserved	ABAKI_c35680
ABK_TSS0625	Scaf1	3900320	+	223.232	P	Conditional	ABAKI_c35730
ABK_TSS0626	Scaf1	3901714	+	12.2439	P	Specific	ABAKI_c35750
ABK_TSS0627	Scaf1	3902829	+	115.414	P	Conditional	ABAKI_c35760
ABK_TSS0628	Scaf1	3909178	+	6796.14	P	Conserved	ABAKI_c35810
ABK_TSS0629	Scaf1	3912151	+	98.4324	P	Specific	ABAKI_c35840
ABK_TSS0630	Scaf1	3926118	+	1451.19	P	Conditional	ABAKI_c36000
ABK_TSS0631	Scaf1	3932549	+	2296.02	P	Conserved	ABAKI_c36070
ABK_TSS0632	Scaf1	3933227	+	155.209	P	Specific	ABAKI_c36080
ABK_TSS0633	Scaf1	3937168	+	539457	N	Conditional	N/A
ABK_TSS0634	Scaf1	3942695	+	4178.88	P	Conditional	ABAKI_c36140
ABK_TSS0635	Scaf1	3943257	+	128.317	P	Conditional	ABAKI_c36150
ABK_TSS0636	Scaf1	3946762	+	58253.1	P	Conditional	ABAKI_c36180
ABK_TSS0637	Scaf1	3963885	+	39.1345	P	Specific	ABAKI_c36320
ABK_TSS0638	Scaf1	3968545	+	1316.21	P	Conserved	ABAKI_c36380
ABK_TSS0639	Scaf1	3973666	+	940.662	P	Conditional	ABAKI_c36410
ABK_TSS0640	Scaf1	3980026	+	401.033	P	Conditional	ABAKI_c36470
ABK_TSS0641	Scaf1	4000148	+	1856.7	P	Conditional	ABAKI_c36630
ABK_TSS0642	Scaf1	4004853	+	43.1675	P	Specific	ABAKI_c36680
ABK_TSS0643	Scaf1	4007555	+	190.014	P	Specific	ABAKI_c36710
ABK_TSS0644	Scaf1	4015188	+	2380.03	P	Conditional	ABAKI_c36800
ABK_TSS0645	Scaf1	4019911	+	283.954	P	Specific	ABAKI_c36860
ABK_TSS0646	Scaf1	4021237	+	846.407	P	Conserved	ABAKI_c36890
ABK_TSS0647	Scaf1	4023096	+	265.491	P	Conditional	ABAKI_c36900
ABK_TSS0648	Scaf1	4033532	+	206.672	P	Conditional	ABAKI_c36980
ABK_TSS0649	Scaf1	4054535	+	2692.46	P	Conditional	ABAKI_c37170
ABK_TSS0650	Scaf1	4059420	+	126.231	P	Conserved	ABAKI_c37230
ABK_TSS0651	Scaf1	4066278	+	246.919	P	Specific	ABAKI_c37290
ABK_TSS0652	Scaf1	4068898	+	15.0239	P	Specific	ABAKI_c37330
ABK_TSS0653	Scaf1	4070278	+	189.766	P	Specific	ABAKI_c37340
ABK_TSS0654	Scaf1	4076991	+	878.017	P	Conserved	ABAKI_c37400
ABK_TSS0655	Scaf1	4078697	+	1297.12	P	Conditional	ABAKI_c37430
ABK_TSS0656	Scaf1	4081314	+	249.401	P	Conditional	ABAKI_c37470
ABK_TSS0657	Scaf1	4082863	+	5240.15	P	Conditional	ABAKI_c37480
ABK_TSS0658	Scaf1	4086199	+	150.496	P	Specific	ABAKI_c37490
ABK_TSS0659	Scaf1	4107266	+	397.445	P	Conditional	ABAKI_c37670
ABK_TSS0660	Scaf1	4121626	+	23.1128	S	Specific	ABAKI_c37850
ABK_TSS0661	Scaf1	4121790	+	81.9994	P	Specific	ABAKI_c37850
ABK_TSS0662	Scaf1	4131433	+	161.702	P	Specific	ABAKI_c37940
ABK_TSS0663	Scaf1	4135026	+	413.277	P	Conditional	ABAKI_c37970
ABK_TSS0664	Scaf1	4141090	+	423.27	P	Conditional	ABAKI_c38050
ABK_TSS0665	Scaf1	4141224	+	387.839	S	Specific	ABAKI_c38050
ABK_TSS0666	Scaf1	4148377	+	3024.47	P	Conditional	ABAKI_c38100
ABK_TSS0667	Scaf1	4148399	+	410.154	S	Specific	ABAKI_c38100
ABK_TSS0668	Scaf1	4158842	+	530.292	P	Conditional	ABAKI_c38180
ABK_TSS0669	Scaf1	4168637	+	2405.07	P	Conserved	ABAKI_c38290
ABK_TSS0670	Scaf1	4183427	+	9.64467	P	Specific	ABAKI_c38380
ABK_TSS0671	Scaf1	4186007	+	13.3161	P	Specific	ABAKI_c38420
ABK_TSS0672	Scaf1	4189903	+	40.1003	N	Specific	N/A
ABK_TSS0673	Scaf1	4200806	+	56.3491	P	Specific	ABAKI_c38580
ABK_TSS0674	Scaf1	4202417	+	1717.01	P	Conditional	ABAKI_c38600
ABK_TSS0675	Scaf1	4211826	+	38.1225	P	Specific	ABAKI_c38690
ABK_TSS0676	Scaf1	4243008	+	3042.63	P	Conserved	ABAKI_c38950
ABK_TSS0677	Scaf1	4255284	+	11.938	N	Specific	N/A
ABK_TSS0678	Scaf1	4255541	+	22.8113	P	Conditional	ABAKI_c39140
ABK_TSS0679	Scaf1	4258934	+	299.224	P	Specific	ABAKI_c39170
ABK_TSS0680	Scaf1	4269633	+	1243.02	P	Conditional	ABAKI_c39270
ABK_TSS0681	Scaf1	4271774	+	33.7854	S	Specific	ABAKI_c39290
ABK_TSS0682	Scaf1	4271857	+	469.361	P	Conditional	ABAKI_c39290
ABK_TSS0683	Scaf1	4273227	+	691.989	A	Specific	ABAKI_c39320
ABK_TSS0684	Scaf1	4275599	+	12820.7	P	Conserved	ABAKI_c39340
ABK_TSS0685	Scaf1	4277784	+	108.129	P	Specific	ABAKI_c39370
ABK_TSS0686	Scaf1	4278853	+	37.946	P	Specific	ABAKI_c39380
ABK_TSS0687	Scaf1	6113	-	-86.0199	P	Specific	ABAKI_c00090
ABK_TSS0688	Scaf1	8337	-	-4769.31	P	Conserved	ABAKI_c00120
ABK_TSS0689	Scaf1	26211	-	-241.978	P	Conditional	ABAKI_c00330
ABK_TSS0690	Scaf1	35501	-	-2625.25	I	Specific	ABAKI_c00390
ABK_TSS0691	Scaf1	36297	-	-110.769	P	Specific	ABAKI_c00390
ABK_TSS0692	Scaf1	43867	-	-92.8603	P	Specific	ABAKI_c00470
ABK_TSS0693	Scaf1	56455	-	-116.407	P	Conditional	ABAKI_c00610
ABK_TSS0694	Scaf1	70491	-	-749.674	P	Conditional	ABAKI_c00750
ABK_TSS0695	Scaf1	78438	-	-823.302	P	Conditional	ABAKI_c00820
ABK_TSS0696	Scaf1	83407	-	-3713.24	P	Conditional	ABAKI_c00880
ABK_TSS0697	Scaf1	86377	-	-134.333	P	Specific	ABAKI_c00910
ABK_TSS0698	Scaf1	91379	-	-20813.6	P	Conditional	ABAKI_c00940
ABK_TSS0699	Scaf1	105584	-	-92.9183	P	Specific	ABAKI_c01040
ABK_TSS0700	Scaf1	107810	-	-4813.39	P	Conserved	ABAKI_c01070
ABK_TSS0701	Scaf1	129875	-	-49.9507	P	Specific	ABAKI_c01300
ABK_TSS0702	Scaf1	137819	-	-5.10302	P	Specific	ABAKI_c01370
ABK_TSS0703	Scaf1	139676	-	-1873.61	P	Conditional	ABAKI_c01390
ABK_TSS0704	Scaf1	150063	-	-2281.96	P	Conditional	ABAKI_c01480
ABK_TSS0705	Scaf1	154151	-	-694.502	P	Conditional	ABAKI_c01540
ABK_TSS0706	Scaf1	163547	-	-732.874	N	Specific	N/A
ABK_TSS0707	Scaf1	163724	-	-263.05	N	Specific	N/A
ABK_TSS0708	Scaf1	197564	-	-46569.8	P	Conserved	ABAKI_c01970
ABK_TSS0709	Scaf1	215918	-	-3326.11	P	Conditional	ABAKI_c02140
ABK_TSS0710	Scaf1	222601	-	2.55	P	Specific	ABAKI_c02180
ABK_TSS0711	Scaf1	231794	-	-2933.16	P	Conditional	ABAKI_c02250
ABK_TSS0712	Scaf1	236756	-	-3756.34	P	Specific	ABAKI_c02290
ABK_TSS0713	Scaf1	239327	-	-552.67	P	Specific	ABAKI_c02310
ABK_TSS0714	Scaf1	240944	-	-502.58	P	Conditional	ABAKI_c02320
ABK_TSS0715	Scaf1	246501	-	-12029.6	P	Conserved	ABAKI_c02360
ABK_TSS0716	Scaf1	250973	-	-429.152	P	Specific	ABAKI_c02400
ABK_TSS0717	Scaf1	256526	-	-180.054	P	Conditional	ABAKI_c02440
ABK_TSS0718	Scaf1	262273	-	-1049.08	P	Conditional	ABAKI_c02500
ABK_TSS0719	Scaf1	267243	-	-27063.7	P	Conserved	ABAKI_c02560
ABK_TSS0720	Scaf1	269290	-	-137.592	P	Specific	ABAKI_c02580
ABK_TSS0721	Scaf1	273580	-	-23982	P	Conserved	ABAKI_c02610
ABK_TSS0722	Scaf1	280762	-	-131.342	P	Specific	ABAKI_c02680
ABK_TSS0723	Scaf1	283465	-	-263.61	P	Specific	ABAKI_c02720
ABK_TSS0724	Scaf1	284494	-	-52.2356	N	Specific	N/A
ABK_TSS0725	Scaf1	288177	-	-194.189	P	Specific	ABAKI_c02750
ABK_TSS0726	Scaf1	290250	-	-12.5578	P	Specific	ABAKI_c02760
ABK_TSS0727	Scaf1	296184	-	-126.674	P	Specific	ABAKI_c02830
ABK_TSS0728	Scaf1	297776	-	-403.289	P	Specific	ABAKI_c02850
ABK_TSS0729	Scaf1	300180	-	-20.8626	S	Specific	ABAKI_c02870
ABK_TSS0730	Scaf1	300385	-	-184.789	P	Specific	ABAKI_c02870
ABK_TSS0731	Scaf1	307674	-	-4858.38	P	Conserved	ABAKI_c02940
ABK_TSS0732	Scaf1	313186	-	-4684.91	P	Conserved	ABAKI_c03000
ABK_TSS0733	Scaf1	315765	-	-657.061	P	Conditional	ABAKI_c03020
ABK_TSS0734	Scaf1	318758	-	-130.42	P	Conditional	ABAKI_c03050
ABK_TSS0735	Scaf1	319508	-	-48.2993	P	Specific	ABAKI_c03060
ABK_TSS0736	Scaf1	330335	-	-16429.6	P	Conserved	ABAKI_c03160
ABK_TSS0737	Scaf1	344139	-	-247.497	P	Conditional	ABAKI_c03300
ABK_TSS0738	Scaf1	344219	-	-120.278	S	Specific	ABAKI_c03300
ABK_TSS0739	Scaf1	351428	-	-1492.87	P	Specific	ABAKI_r00020
ABK_TSS0740	Scaf1	353692	-	-90.9559	S	Specific	ABAKI_r00030
ABK_TSS0741	Scaf1	353721	-	-90.4684	S	Conditional	ABAKI_r00030
ABK_TSS0742	Scaf1	354379	-	-2295.7	P	Specific	ABAKI_t00140
ABK_TSS0743	Scaf1	356397	-	-2390.81	P	Conserved	ABAKI_c03340
ABK_TSS0744	Scaf1	357547	-	-27.6756	P	Specific	ABAKI_c03350
ABK_TSS0745	Scaf1	361026	-	-571.78	P	Conditional	ABAKI_c03390
ABK_TSS0746	Scaf1	367261	-	-5206.2	P	Conditional	ABAKI_c03410
ABK_TSS0747	Scaf1	368214	-	-86.9864	P	Specific	ABAKI_c03420
ABK_TSS0748	Scaf1	369735	-	-213.131	P	Specific	ABAKI_c03430
ABK_TSS0749	Scaf1	371775	-	-1048.55	P	Conditional	ABAKI_c03440
ABK_TSS0750	Scaf1	372195	-	-393330	N	Conditional	N/A
ABK_TSS0751	Scaf1	376934	-	-68.4379	S	Specific	ABAKI_c03480
ABK_TSS0752	Scaf1	376979	-	-117.932	S	Specific	ABAKI_c03480
ABK_TSS0753	Scaf1	377023	-	-509.1	P	Conditional	ABAKI_c03480
ABK_TSS0754	Scaf1	381672	-	-1983.38	P	Conditional	ABAKI_c03520
ABK_TSS0755	Scaf1	383220	-	-431.299	P	Conditional	ABAKI_c03540
ABK_TSS0756	Scaf1	384386	-	-568.498	I	Specific	ABAKI_c03560
ABK_TSS0757	Scaf1	385710	-	-2549.36	P	Conditional	ABAKI_c03570
ABK_TSS0758	Scaf1	389148	-	-31.4674	P	Specific	ABAKI_c03600
ABK_TSS0759	Scaf1	393057	-	-434.288	P	Conditional	ABAKI_c03640
ABK_TSS0760	Scaf1	395770	-	-29009.2	P	Conserved	ABAKI_c03670
ABK_TSS0761	Scaf1	402687	-	-7084.62	P	Conserved	ABAKI_c03730
ABK_TSS0762	Scaf1	407995	-	-4220.43	P	Conserved	ABAKI_c03790
ABK_TSS0763	Scaf1	408997	-	-459.541	P	Specific	ABAKI_c03800
ABK_TSS0764	Scaf1	452806	-	-11209.4	P	Specific	ABAKI_c04200
ABK_TSS0765	Scaf1	457353	-	-118.865	P	Specific	ABAKI_c04250
ABK_TSS0766	Scaf1	457405	-	-55.2904	S	Conditional	ABAKI_c04250
ABK_TSS0767	Scaf1	458037	-	-415250	N	Conserved	N/A
ABK_TSS0768	Scaf1	463415	-	-5970.24	P	Conserved	ABAKI_c04330
ABK_TSS0769	Scaf1	464781	-	-866.713	S	Specific	ABAKI_c04350
ABK_TSS0770	Scaf1	464790	-	-1032.94	P	Specific	ABAKI_c04350
ABK_TSS0771	Scaf1	466621	-	-471.961	P	Conditional	ABAKI_c04360
ABK_TSS0772	Scaf1	466651	-	-5.10302	S	Specific	ABAKI_c04360
ABK_TSS0773	Scaf1	468975	-	-7993.4	P	Conditional	ABAKI_c04380
ABK_TSS0774	Scaf1	472778	-	-168.154	S	Conditional	ABAKI_c04420
ABK_TSS0775	Scaf1	473009	-	-5277.85	P	Conserved	ABAKI_c04420
ABK_TSS0776	Scaf1	474694	-	-286.425	P	Specific	ABAKI_c04430
ABK_TSS0777	Scaf1	475138	-	-97.8128	P	Specific	ABAKI_c04440
ABK_TSS0778	Scaf1	475357	-	-22.6946	S	Specific	ABAKI_c04440
ABK_TSS0779	Scaf1	477893	-	-180.617	P	Conditional	ABAKI_c04490
ABK_TSS0780	Scaf1	486436	-	-395.601	P	Conditional	ABAKI_c04600
ABK_TSS0781	Scaf1	488791	-	-7919.86	P	Conditional	ABAKI_c04630
ABK_TSS0782	Scaf1	492595	-	-173.477	S	Conditional	ABAKI_c04670
ABK_TSS0783	Scaf1	492825	-	-5372.43	P	Conserved	ABAKI_c04670
ABK_TSS0784	Scaf1	494954	-	-98.9652	P	Specific	ABAKI_c04690
ABK_TSS0785	Scaf1	495172	-	-14.1597	S	Specific	ABAKI_c04690
ABK_TSS0786	Scaf1	497704	-	-114.462	P	Specific	ABAKI_c04710
ABK_TSS0787	Scaf1	498920	-	-85.8959	P	Specific	ABAKI_c04720
ABK_TSS0788	Scaf1	505625	-	-1602.35	P	Specific	ABAKI_c04760
ABK_TSS0789	Scaf1	507138	-	-26.2791	P	Specific	ABAKI_c04770
ABK_TSS0790	Scaf1	509584	-	-518.377	P	Conditional	ABAKI_c04800
ABK_TSS0791	Scaf1	511381	-	-48585.4	P	Conserved	ABAKI_c04810
ABK_TSS0792	Scaf1	514049	-	-1671.8	P	Specific	ABAKI_c04830
ABK_TSS0793	Scaf1	516605	-	-140.678	I	Specific	ABAKI_c04840
ABK_TSS0794	Scaf1	517245	-	-492.452	P	Conditional	ABAKI_c04840
ABK_TSS0795	Scaf1	518087	-	-1392.29	P	Conditional	ABAKI_c04860
ABK_TSS0796	Scaf1	518605	-	-313.324	P	Conditional	ABAKI_c04870
ABK_TSS0797	Scaf1	520023	-	-47.0166	P	Specific	ABAKI_c04880
ABK_TSS0798	Scaf1	521640	-	-142.956	P	Conserved	ABAKI_c04900
ABK_TSS0799	Scaf1	525701	-	-139.047	P	Conditional	ABAKI_c04950
ABK_TSS0800	Scaf1	527233	-	-980.203	P	Conditional	ABAKI_c04960
ABK_TSS0801	Scaf1	530913	-	-4105.16	P	Conserved	ABAKI_c04990
ABK_TSS0802	Scaf1	532196	-	-1019.78	P	Conditional	ABAKI_c05000
ABK_TSS0803	Scaf1	555629	-	-26.6862	P	Specific	ABAKI_c05230
ABK_TSS0804	Scaf1	558187	-	-46.0701	P	Specific	ABAKI_c05260
ABK_TSS0805	Scaf1	560603	-	-497.701	P	Specific	ABAKI_c05280
ABK_TSS0806	Scaf1	563216	-	-10.7257	P	Specific	ABAKI_c05310
ABK_TSS0807	Scaf1	565505	-	-77.0672	P	Specific	ABAKI_c05330
ABK_TSS0808	Scaf1	565532	-	-35.2538	S	Specific	ABAKI_c05330
ABK_TSS0809	Scaf1	579095	-	-2351.45	P	Conserved	ABAKI_c05430
ABK_TSS0810	Scaf1	585512	-	-163.892	P	Specific	ABAKI_c05460
ABK_TSS0811	Scaf1	587214	-	-1129.23	P	Conditional	ABAKI_c05470
ABK_TSS0812	Scaf1	591913	-	-3241.54	P	Conserved	ABAKI_c05540
ABK_TSS0813	Scaf1	594487	-	-727.602	P	Conditional	ABAKI_c05590
ABK_TSS0814	Scaf1	595443	-	-506.239	P	Specific	ABAKI_c05600
ABK_TSS0815	Scaf1	600357	-	-247.127	P	Specific	ABAKI_c05640
ABK_TSS0816	Scaf1	602561	-	-620.384	I	Specific	ABAKI_c05670
ABK_TSS0817	Scaf1	603609	-	-550.002	P	Specific	ABAKI_c05670
ABK_TSS0818	Scaf1	604613	-	-44.9661	P	Specific	ABAKI_c05680
ABK_TSS0819	Scaf1	606606	-	-35.9971	P	Specific	ABAKI_c05700
ABK_TSS0820	Scaf1	608248	-	-73.7336	P	Specific	ABAKI_c05710
ABK_TSS0821	Scaf1	622578	-	-22.0503	P	Conditional	ABAKI_c05830
ABK_TSS0822	Scaf1	623075	-	-1692.72	A	Specific	ABAKI_c05850
ABK_TSS0823	Scaf1	627184	-	-31.8246	S	Specific	ABAKI_c05890
ABK_TSS0824	Scaf1	627376	-	-843.033	P	Conditional	ABAKI_c05890
ABK_TSS0825	Scaf1	632430	-	-784.829	P	Specific	ABAKI_c05940
ABK_TSS0826	Scaf1	632488	-	-87.5199	S	Conditional	ABAKI_c05940
ABK_TSS0827	Scaf1	635811	-	-1291.82	P	Conditional	ABAKI_c05960
ABK_TSS0828	Scaf1	640952	-	-45133.6	P	Conserved	ABAKI_c06010
ABK_TSS0829	Scaf1	643739	-	-154.484	P	Specific	ABAKI_c06040
ABK_TSS0830	Scaf1	644575	-	-2824.59	P	Conditional	ABAKI_c06060
ABK_TSS0831	Scaf1	647030	-	-242.904	P	Specific	ABAKI_c06070
ABK_TSS0832	Scaf1	648430	-	-466.799	N	Conserved	N/A
ABK_TSS0833	Scaf1	649864	-	-281.024	P	Conditional	ABAKI_c06090
ABK_TSS0834	Scaf1	657687	-	-320.228	P	Specific	ABAKI_c06140
ABK_TSS0835	Scaf1	670337	-	-18931.5	P	Conserved	ABAKI_c06280
ABK_TSS0836	Scaf1	679519	-	-119.105	P	Specific	ABAKI_c06390
ABK_TSS0837	Scaf1	680693	-	-245.74	P	Specific	ABAKI_c06400
ABK_TSS0838	Scaf1	688666	-	-1298.23	P	Conditional	ABAKI_c06450
ABK_TSS0839	Scaf1	688823	-	-5.8041	S	Specific	ABAKI_c06450
ABK_TSS0840	Scaf1	691238	-	-1561.52	P	Conserved	ABAKI_c06480
ABK_TSS0841	Scaf1	691316	-	-125.941	S	Specific	ABAKI_c06480
ABK_TSS0842	Scaf1	694081	-	-241.033	P	Specific	ABAKI_c06510
ABK_TSS0843	Scaf1	694255	-	-3468.11	N	Conditional	N/A
ABK_TSS0844	Scaf1	705540	-	-106.674	P	Specific	ABAKI_c06540
ABK_TSS0845	Scaf1	709995	-	-18962.4	P	Conserved	ABAKI_c06580
ABK_TSS0846	Scaf1	712301	-	-11137.8	P	Conditional	ABAKI_c06590
ABK_TSS0847	Scaf1	713599	-	-7652.35	N	Conserved	N/A
ABK_TSS0848	Scaf1	714462	-	-4459.82	P	Specific	ABAKI_c06620
ABK_TSS0849	Scaf1	715247	-	-1239.95	P	Conditional	ABAKI_c06630
ABK_TSS0850	Scaf1	717177	-	-962.067	P	Conditional	ABAKI_c06650
ABK_TSS0851	Scaf1	719048	-	-26905.7	P	Conserved	ABAKI_c06690
ABK_TSS0852	Scaf1	721159	-	-51.2641	P	Specific	ABAKI_c06710
ABK_TSS0853	Scaf1	722354	-	-35516.2	P	Conserved	ABAKI_c06730
ABK_TSS0854	Scaf1	724281	-	-389.831	P	Specific	ABAKI_c06740
ABK_TSS0855	Scaf1	725428	-	-11	I	Specific	ABAKI_c06750
ABK_TSS0856	Scaf1	727735	-	-432.179	I	Specific	ABAKI_c06780
ABK_TSS0857	Scaf1	740876	-	-13336.3	P	Conditional	ABAKI_c06930
ABK_TSS0858	Scaf1	743552	-	-3417.32	P	Conserved	ABAKI_c06950
ABK_TSS0859	Scaf1	755372	-	-1306.03	P	Conditional	ABAKI_c07160
ABK_TSS0860	Scaf1	757336	-	-728.876	P	Conserved	ABAKI_c07180
ABK_TSS0861	Scaf1	761460	-	-72.8353	P	Specific	ABAKI_c07220
ABK_TSS0862	Scaf1	764873	-	-2.5	P	Specific	ABAKI_c07250
ABK_TSS0863	Scaf1	773746	-	-80.8804	P	Specific	ABAKI_c07390
ABK_TSS0864	Scaf1	779457	-	-396	P	Conditional	ABAKI_c07430
ABK_TSS0865	Scaf1	779994	-	-100.445	P	Specific	ABAKI_c07440
ABK_TSS0866	Scaf1	789216	-	-2824.07	P	Specific	ABAKI_c07520
ABK_TSS0867	Scaf1	799947	-	-7558.88	P	Conserved	ABAKI_c07590
ABK_TSS0868	Scaf1	802468	-	-459.837	P	Specific	ABAKI_c07610
ABK_TSS0869	Scaf1	805077	-	-12858.4	P	Conserved	ABAKI_c07630
ABK_TSS0870	Scaf1	813418	-	-8077.63	P	Conserved	ABAKI_c07750
ABK_TSS0871	Scaf1	815469	-	-947.816	P	Conditional	ABAKI_c07760
ABK_TSS0872	Scaf1	820591	-	-3385.87	P	Conditional	ABAKI_c07790
ABK_TSS0873	Scaf1	822261	-	-1812.3	N	Conditional	N/A
ABK_TSS0874	Scaf1	825130	-	-37.5274	P	Specific	ABAKI_c07830
ABK_TSS0875	Scaf1	838325	-	-591.01	P	Conditional	ABAKI_c07960
ABK_TSS0876	Scaf1	841785	-	-80.7124	P	Specific	ABAKI_c08020
ABK_TSS0877	Scaf1	844613	-	-357.253	P	Conditional	ABAKI_c08050
ABK_TSS0878	Scaf1	848661	-	-1035.9	P	Conditional	ABAKI_c08110
ABK_TSS0879	Scaf1	849616	-	-128.276	N	Specific	N/A
ABK_TSS0880	Scaf1	852426	-	-1783.91	P	Specific	ABAKI_c08170
ABK_TSS0881	Scaf1	854829	-	-5183.58	P	Conditional	ABAKI_c08200
ABK_TSS0882	Scaf1	858257	-	-759	P	Specific	ABAKI_c08230
ABK_TSS0883	Scaf1	865028	-	-367.262	P	Conditional	ABAKI_c08280
ABK_TSS0884	Scaf1	868651	-	-135.754	P	Specific	ABAKI_c08310
ABK_TSS0885	Scaf1	872647	-	-78.9622	N	Specific	N/A
ABK_TSS0886	Scaf1	909253	-	-904.226	P	Conserved	ABAKI_c08660
ABK_TSS0887	Scaf1	924222	-	-695.028	P	Conditional	ABAKI_c08720
ABK_TSS0888	Scaf1	927991	-	-197.176	P	Specific	ABAKI_c08760
ABK_TSS0889	Scaf1	932591	-	-21482.6	P	Conditional	ABAKI_c08800
ABK_TSS0890	Scaf1	933621	-	-249.964	P	Specific	ABAKI_c08810
ABK_TSS0891	Scaf1	938309	-	-300.189	P	Specific	ABAKI_c08850
ABK_TSS0892	Scaf1	940179	-	-180.659	P	Specific	ABAKI_c08880
ABK_TSS0893	Scaf1	942278	-	-3251.62	P	Conditional	ABAKI_c08910
ABK_TSS0894	Scaf1	949161	-	-8120.32	P	Conditional	ABAKI_c08980
ABK_TSS0895	Scaf1	952786	-	-431.248	P	Conditional	ABAKI_c09000
ABK_TSS0896	Scaf1	954314	-	-410.891	P	Conditional	ABAKI_c09010
ABK_TSS0897	Scaf1	958441	-	-1337.58	P	Conditional	ABAKI_c09060
ABK_TSS0898	Scaf1	961541	-	-105.136	P	Specific	ABAKI_c09090
ABK_TSS0899	Scaf1	964432	-	-357783	P	Conserved	ABAKI_c09110
ABK_TSS0900	Scaf1	973640	-	-2389.88	P	Conditional	ABAKI_c09210
ABK_TSS0901	Scaf1	974936	-	-1683.26	P	Conserved	ABAKI_c09220
ABK_TSS0902	Scaf1	981440	-	-198.674	P	Specific	ABAKI_c09290
ABK_TSS0903	Scaf1	986571	-	-48.6274	P	Conditional	ABAKI_c09340
ABK_TSS0904	Scaf1	990991	-	-58587.7	P	Conserved	ABAKI_c09370
ABK_TSS0905	Scaf1	998406	-	-438.009	P	Conditional	ABAKI_c09450
ABK_TSS0906	Scaf1	1003362	-	-6064.17	P	Conserved	ABAKI_c09510
ABK_TSS0907	Scaf1	1004298	-	-4446.5	P	Conditional	ABAKI_c09520
ABK_TSS0908	Scaf1	1014636	-	-4067.44	P	Conditional	ABAKI_c09650
ABK_TSS0909	Scaf1	1016535	-	-147.467	P	Specific	ABAKI_c09670
ABK_TSS0910	Scaf1	1019448	-	-3923.2	P	Conditional	ABAKI_c09710
ABK_TSS0911	Scaf1	1020029	-	-4769.6	P	Conditional	ABAKI_c09720
ABK_TSS0912	Scaf1	1022231	-	-246.661	S	Specific	ABAKI_c09730
ABK_TSS0913	Scaf1	1022299	-	-1595.35	P	Specific	ABAKI_c09730
ABK_TSS0914	Scaf1	1022903	-	-1977.52	N	Conditional	N/A
ABK_TSS0915	Scaf1	1028577	-	-199.025	P	Specific	ABAKI_c09790
ABK_TSS0916	Scaf1	1029553	-	-6802.62	P	Conditional	ABAKI_c09800
ABK_TSS0917	Scaf1	1031785	-	-4088.19	P	Conditional	ABAKI_c09840
ABK_TSS0918	Scaf1	1041937	-	-301.151	P	Specific	ABAKI_c09930
ABK_TSS0919	Scaf1	1045216	-	-5362.51	N	Conditional	N/A
ABK_TSS0920	Scaf1	1047196	-	-340.893	P	Specific	ABAKI_c09950
ABK_TSS0921	Scaf1	1047268	-	-181.525	S	Conditional	ABAKI_c09950
ABK_TSS0922	Scaf1	1049364	-	-2601.04	P	Specific	ABAKI_c09970
ABK_TSS0923	Scaf1	1051363	-	-242.31	P	Conditional	ABAKI_c09980
ABK_TSS0924	Scaf1	1063782	-	-1277.85	P	Conditional	ABAKI_c10120
ABK_TSS0925	Scaf1	1071151	-	-223.423	P	Specific	ABAKI_c10190
ABK_TSS0926	Scaf1	1072923	-	-155.642	P	Conditional	ABAKI_c10210
ABK_TSS0927	Scaf1	1073570	-	-82.3822	P	Specific	ABAKI_c10220
ABK_TSS0928	Scaf1	1077286	-	-628.962	P	Conditional	ABAKI_c10270
ABK_TSS0929	Scaf1	1079706	-	-998.658	P	Specific	ABAKI_c10300
ABK_TSS0930	Scaf1	1080228	-	-908.127	S	Conditional	ABAKI_c10310
ABK_TSS0931	Scaf1	1080293	-	-4823.3	P	Conditional	ABAKI_c10310
ABK_TSS0932	Scaf1	1081372	-	-156.329	P	Specific	ABAKI_c10320
ABK_TSS0933	Scaf1	1083902	-	-10875	P	Conditional	ABAKI_c10360
ABK_TSS0934	Scaf1	1085309	-	-1141.29	P	Specific	ABAKI_c10370
ABK_TSS0935	Scaf1	1085403	-	-113.608	S	Conditional	ABAKI_c10370
ABK_TSS0936	Scaf1	1087116	-	-112.44	A	Specific	ABAKI_c10410
ABK_TSS0937	Scaf1	1094805	-	-22699.2	P	Conserved	ABAKI_c10500
ABK_TSS0938	Scaf1	1126804	-	-887.329	I	Conditional	ABAKI_c10800
ABK_TSS0939	Scaf1	1145778	-	-565.947	P	Specific	ABAKI_c10980
ABK_TSS0940	Scaf1	1148947	-	-8095.84	P	Specific	ABAKI_c11010
ABK_TSS0941	Scaf1	1168328	-	-4119.93	P	Conserved	ABAKI_c11180
ABK_TSS0942	Scaf1	1186488	-	-4023.46	P	Conserved	ABAKI_c11330
ABK_TSS0943	Scaf1	1206305	-	-734.59	P	Specific	ABAKI_c11630
ABK_TSS0944	Scaf1	1206744	-	-124.247	N	Specific	N/A
ABK_TSS0945	Scaf1	1209286	-	-1458.49	P	Conserved	ABAKI_c11680
ABK_TSS0946	Scaf1	1213404	-	-56.8063	P	Specific	ABAKI_c11710
ABK_TSS0947	Scaf1	1225685	-	-89.302	S	Specific	ABAKI_c11800
ABK_TSS0948	Scaf1	1225767	-	-733.009	P	Specific	ABAKI_c11800
ABK_TSS0949	Scaf1	1226206	-	-127.342	N	Specific	N/A
ABK_TSS0950	Scaf1	1228748	-	-1471.96	P	Conserved	ABAKI_c11850
ABK_TSS0951	Scaf1	1236207	-	-9385.45	P	Conditional	ABAKI_c11920
ABK_TSS0952	Scaf1	1249130	-	-258.585	I	Conditional	ABAKI_c12000
ABK_TSS0953	Scaf1	1249694	-	-197.608	P	Specific	ABAKI_c12010
ABK_TSS0954	Scaf1	1252719	-	-2753.35	P	Conserved	ABAKI_c12040
ABK_TSS0955	Scaf1	1254740	-	-179.381	P	Specific	ABAKI_c12060
ABK_TSS0956	Scaf1	1263052	-	-188.467	P	Conditional	ABAKI_c12080
ABK_TSS0957	Scaf1	1272650	-	-116.077	P	Specific	ABAKI_c12210
ABK_TSS0958	Scaf1	1289416	-	-8367.59	P	Conditional	ABAKI_c12340
ABK_TSS0959	Scaf1	1290751	-	-39.5262	P	Specific	ABAKI_c12350
ABK_TSS0960	Scaf1	1319056	-	-2241.52	P	Conditional	ABAKI_c12730
ABK_TSS0961	Scaf1	1324440	-	-82.6314	P	Specific	ABAKI_c12790
ABK_TSS0962	Scaf1	1325241	-	-29325.4	P	Conserved	ABAKI_c12800
ABK_TSS0963	Scaf1	1326019	-	-380.209	N	Specific	N/A
ABK_TSS0964	Scaf1	1328525	-	-2257.94	P	Conditional	ABAKI_c12840
ABK_TSS0965	Scaf1	1335319	-	-204.656	P	Specific	ABAKI_c12920
ABK_TSS0966	Scaf1	1337811	-	-37512.3	P	Conserved	ABAKI_c12970
ABK_TSS0967	Scaf1	1337888	-	-15.0239	S	Specific	ABAKI_c12970
ABK_TSS0968	Scaf1	1337922	-	-968.096	S	Conditional	ABAKI_c12970
ABK_TSS0969	Scaf1	1338721	-	-481.091	P	Conditional	ABAKI_c12990
ABK_TSS0970	Scaf1	1339603	-	-21022.4	P	Conditional	ABAKI_c13000
ABK_TSS0971	Scaf1	1340732	-	-759.894	I	Specific	ABAKI_c13010
ABK_TSS0972	Scaf1	1340950	-	-181.406	P	Specific	ABAKI_c13010
ABK_TSS0973	Scaf1	1342216	-	-2041.37	P	Conditional	ABAKI_c13040
ABK_TSS0974	Scaf1	1343073	-	-106.089	I	Specific	ABAKI_c13050
ABK_TSS0975	Scaf1	1343921	-	-8.32	I	Specific	ABAKI_c13050
ABK_TSS0976	Scaf1	1344792	-	-84.1812	I	Specific	ABAKI_c13060
ABK_TSS0977	Scaf1	1345039	-	-4536.45	P	Conditional	ABAKI_c13060
ABK_TSS0978	Scaf1	1350402	-	-154.964	P	Specific	ABAKI_c13090
ABK_TSS0979	Scaf1	1353665	-	-38716.2	P	Conserved	ABAKI_c13120
ABK_TSS0980	Scaf1	1357880	-	-3705.02	P	Conserved	ABAKI_c13160
ABK_TSS0981	Scaf1	1357960	-	-2858.12	S	Conserved	ABAKI_c13160
ABK_TSS0982	Scaf1	1361004	-	-738.168	P	Conditional	ABAKI_c13190
ABK_TSS0983	Scaf1	1363126	-	-266.941	P	Conserved	ABAKI_c13210
ABK_TSS0984	Scaf1	1376556	-	-174.32	P	Specific	ABAKI_c13320
ABK_TSS0985	Scaf1	1380147	-	-305.6	P	Conditional	ABAKI_c13350
ABK_TSS0986	Scaf1	1384020	-	-206.73	P	Specific	ABAKI_c13380
ABK_TSS0987	Scaf1	1386481	-	-397.127	P	Conditional	ABAKI_c13400
ABK_TSS0988	Scaf1	1395996	-	-629.655	P	Conserved	ABAKI_c13480
ABK_TSS0989	Scaf1	1396659	-	-2195.7	P	Conditional	ABAKI_c13490
ABK_TSS0990	Scaf1	1402725	-	-4.21281	P	Specific	ABAKI_c13540
ABK_TSS0991	Scaf1	1405285	-	-109.629	P	Specific	ABAKI_c13570
ABK_TSS0992	Scaf1	1408506	-	-9403.49	P	Conditional	ABAKI_c13610
ABK_TSS0993	Scaf1	1410310	-	-225473	P	Conserved	ABAKI_c13640
ABK_TSS0994	Scaf1	1413085	-	-41.0444	P	Specific	ABAKI_c13650
ABK_TSS0995	Scaf1	1413526	-	-6.4325	N	Specific	N/A
ABK_TSS0996	Scaf1	1415198	-	-8.36341	P	Specific	ABAKI_c13670
ABK_TSS0997	Scaf1	1418219	-	-614.968	P	Specific	ABAKI_c13710
ABK_TSS0998	Scaf1	1420186	-	-131.34	I	Specific	ABAKI_c13720
ABK_TSS0999	Scaf1	1426639	-	-167.554	P	Specific	ABAKI_c13800
ABK_TSS1000	Scaf1	1427826	-	-74.2424	P	Specific	ABAKI_c13820
ABK_TSS1001	Scaf1	1430216	-	-2877.58	P	Conserved	ABAKI_c13850
ABK_TSS1002	Scaf1	1437290	-	-60.1985	P	Specific	ABAKI_c13910
ABK_TSS1003	Scaf1	1441681	-	-37157.4	P	Conditional	ABAKI_c13950
ABK_TSS1004	Scaf1	1441769	-	-43.3757	S	Specific	ABAKI_c13950
ABK_TSS1005	Scaf1	1441777	-	-551.835	S	Conditional	ABAKI_c13950
ABK_TSS1006	Scaf1	1449033	-	-66.2625	P	Specific	ABAKI_c14020
ABK_TSS1007	Scaf1	1449808	-	-225.742	P	Conditional	ABAKI_c14030
ABK_TSS1008	Scaf1	1452995	-	-315.769	N	Specific	N/A
ABK_TSS1009	Scaf1	1453742	-	-10178	P	Conditional	ABAKI_c14090
ABK_TSS1010	Scaf1	1457109	-	-74.2101	P	Specific	ABAKI_c14140
ABK_TSS1011	Scaf1	1458429	-	-994.344	P	Conserved	ABAKI_c14160
ABK_TSS1012	Scaf1	1460498	-	-23.9288	P	Specific	ABAKI_c14180
ABK_TSS1013	Scaf1	1464876	-	-510.541	P	Conserved	ABAKI_c14220
ABK_TSS1014	Scaf1	1466567	-	-97.7796	P	Specific	ABAKI_c14230
ABK_TSS1015	Scaf1	1468459	-	-65.4976	S	Specific	ABAKI_c14250
ABK_TSS1016	Scaf1	1468634	-	-230.678	P	Specific	ABAKI_c14250
ABK_TSS1017	Scaf1	1471340	-	-2217.26	P	Specific	ABAKI_c14290
ABK_TSS1018	Scaf1	1471739	-	-12818.9	P	Conserved	ABAKI_c14300
ABK_TSS1019	Scaf1	1476807	-	-1562.37	P	Conserved	ABAKI_c14340
ABK_TSS1020	Scaf1	1481524	-	-172.737	P	Specific	ABAKI_c14370
ABK_TSS1021	Scaf1	1482368	-	-4770.3	P	Conditional	ABAKI_c14380
ABK_TSS1022	Scaf1	1483199	-	-482.315	P	Conditional	ABAKI_c14390
ABK_TSS1023	Scaf1	1488070	-	-1842.03	P	Conserved	ABAKI_c14440
ABK_TSS1024	Scaf1	1490871	-	-440.488	P	Specific	ABAKI_c14460
ABK_TSS1025	Scaf1	1491168	-	-2096.3	P	Conditional	ABAKI_c14470
ABK_TSS1026	Scaf1	1492609	-	-6919.51	P	Conditional	ABAKI_t00380
ABK_TSS1027	Scaf1	1492716	-	-163.176	S	Conditional	ABAKI_t00380
ABK_TSS1028	Scaf1	1494694	-	-3828.18	P	Conditional	ABAKI_c14520
ABK_TSS1029	Scaf1	1497995	-	-7.38556	S	Specific	ABAKI_c14540
ABK_TSS1030	Scaf1	1498004	-	-98.3539	P	Specific	ABAKI_c14540
ABK_TSS1031	Scaf1	1499773	-	-4006.82	P	Conserved	ABAKI_c14550
ABK_TSS1032	Scaf1	1504948	-	-15648.8	P	Conserved	ABAKI_c14580
ABK_TSS1033	Scaf1	1506794	-	-26540.3	P	Conserved	ABAKI_c14600
ABK_TSS1034	Scaf1	1507825	-	-1730.6	P	Conserved	ABAKI_c14610
ABK_TSS1035	Scaf1	1511296	-	-8482.52	A	Specific	ABAKI_c14650
ABK_TSS1036	Scaf1	1513899	-	-6814.76	P	Conserved	ABAKI_c14670
ABK_TSS1037	Scaf1	1514495	-	-7353.56	P	Conditional	ABAKI_c14680
ABK_TSS1038	Scaf1	1522772	-	-910.239	P	Conserved	ABAKI_c14760
ABK_TSS1039	Scaf1	1526262	-	-41.5001	P	Specific	ABAKI_c14790
ABK_TSS1040	Scaf1	1529681	-	-46.0048	P	Specific	ABAKI_c14830
ABK_TSS1041	Scaf1	1540829	-	-3084.03	N	Conditional	N/A
ABK_TSS1042	Scaf1	1542061	-	-2854.54	P	Conserved	ABAKI_c14950
ABK_TSS1043	Scaf1	1547157	-	-132.266	P	Specific	ABAKI_c14970
ABK_TSS1044	Scaf1	1569618	-	-100.541	P	Specific	ABAKI_c15140
ABK_TSS1045	Scaf1	1571504	-	-1568.37	P	Specific	ABAKI_c15160
ABK_TSS1046	Scaf1	1572619	-	-152.591	N	Specific	N/A
ABK_TSS1047	Scaf1	1572643	-	-1105.97	N	Conditional	N/A
ABK_TSS1048	Scaf1	1573261	-	-1210.53	N	Conditional	N/A
ABK_TSS1049	Scaf1	1577958	-	-334.952	S	Specific	ABAKI_c15220
ABK_TSS1050	Scaf1	1577998	-	-626.638	P	Conditional	ABAKI_c15220
ABK_TSS1051	Scaf1	1581091	-	-785.063	N	Conditional	N/A
ABK_TSS1052	Scaf1	1581111	-	-265.47	N	Specific	N/A
ABK_TSS1053	Scaf1	1583933	-	-4151.74	P	Conditional	ABAKI_c15280
ABK_TSS1054	Scaf1	1586643	-	-139.502	P	Specific	ABAKI_c15300
ABK_TSS1055	Scaf1	1589187	-	-294.727	P	Specific	ABAKI_c15330
ABK_TSS1056	Scaf1	1600909	-	-67.3932	S	Specific	ABAKI_c15410
ABK_TSS1057	Scaf1	1601067	-	-8352.13	P	Conserved	ABAKI_c15410
ABK_TSS1058	Scaf1	1601459	-	-440.034	N	Specific	N/A
ABK_TSS1059	Scaf1	1609990	-	-776.499	N	Conditional	N/A
ABK_TSS1060	Scaf1	1609999	-	-190.278	N	Specific	N/A
ABK_TSS1061	Scaf1	1616856	-	-66.0915	P	Specific	ABAKI_c15550
ABK_TSS1062	Scaf1	1621186	-	-2258.51	P	Conserved	ABAKI_c15570
ABK_TSS1063	Scaf1	1629801	-	-303.821	P	Specific	ABAKI_c15660
ABK_TSS1064	Scaf1	1630985	-	-812.082	S	Specific	ABAKI_c15670
ABK_TSS1065	Scaf1	1631173	-	-3769.22	P	Conserved	ABAKI_c15670
ABK_TSS1066	Scaf1	1644345	-	-450.598	P	Conditional	ABAKI_c15750
ABK_TSS1067	Scaf1	1684478	-	-4628.44	P	Conserved	ABAKI_c15940
ABK_TSS1068	Scaf1	1687053	-	-451.688	P	Specific	ABAKI_c15970
ABK_TSS1069	Scaf1	1688714	-	-604.708	S	Specific	ABAKI_c15980
ABK_TSS1070	Scaf1	1688730	-	-1664.12	P	Conditional	ABAKI_c15980
ABK_TSS1071	Scaf1	1693049	-	-174.801	A	Conditional	ABAKI_c16020
ABK_TSS1072	Scaf1	1696411	-	-83.772	P	Specific	ABAKI_c16050
ABK_TSS1073	Scaf1	1698273	-	-63.3284	P	Specific	ABAKI_c16070
ABK_TSS1074	Scaf1	1702661	-	-125.726	P	Specific	ABAKI_c16100
ABK_TSS1075	Scaf1	1712284	-	-58.1098	P	Specific	ABAKI_c16200
ABK_TSS1076	Scaf1	1716370	-	-131.605	P	Specific	ABAKI_c16250
ABK_TSS1077	Scaf1	1718540	-	-313.884	P	Specific	ABAKI_c16280
ABK_TSS1078	Scaf1	1721199	-	-7251.01	N	Conserved	N/A
ABK_TSS1079	Scaf1	1730261	-	-1184.12	P	Specific	ABAKI_c16410
ABK_TSS1080	Scaf1	1731265	-	-680.317	P	Conditional	ABAKI_c16420
ABK_TSS1081	Scaf1	1736540	-	-475.777	P	Conditional	ABAKI_c16500
ABK_TSS1082	Scaf1	1741056	-	-118.981	P	Conditional	ABAKI_c16530
ABK_TSS1083	Scaf1	1754986	-	-1870.94	P	Conserved	ABAKI_c16680
ABK_TSS1084	Scaf1	1760368	-	-3888.48	N	Conditional	N/A
ABK_TSS1085	Scaf1	1762373	-	-1058.65	P	Conditional	ABAKI_c16770
ABK_TSS1086	Scaf1	1769320	-	-5192.92	P	Conserved	ABAKI_c16870
ABK_TSS1087	Scaf1	1771161	-	-1989.33	P	Conserved	ABAKI_c16890
ABK_TSS1088	Scaf1	1774075	-	-133.637	P	Conditional	ABAKI_c16910
ABK_TSS1089	Scaf1	1778677	-	-657.582	P	Conditional	ABAKI_c16960
ABK_TSS1090	Scaf1	1779180	-	-402.384	P	Conditional	ABAKI_c16970
ABK_TSS1091	Scaf1	1782260	-	-344.515	P	Conditional	ABAKI_c17000
ABK_TSS1092	Scaf1	1785823	-	-601.667	P	Conditional	ABAKI_c17040
ABK_TSS1093	Scaf1	1787423	-	-9714.66	P	Conserved	ABAKI_c17050
ABK_TSS1094	Scaf1	1787993	-	-2922.91	P	Specific	ABAKI_c17060
ABK_TSS1095	Scaf1	1794281	-	-1809.19	P	Conditional	ABAKI_c17100
ABK_TSS1096	Scaf1	1812082	-	-84.3907	S	Specific	ABAKI_r00030
ABK_TSS1097	Scaf1	1812111	-	-116.987	S	Conditional	ABAKI_r00030
ABK_TSS1098	Scaf1	1813384	-	-107.196	P	Specific	ABAKI_c17190
ABK_TSS1099	Scaf1	1814746	-	-117.484	P	Specific	ABAKI_c17210
ABK_TSS1100	Scaf1	1820343	-	-293.084	P	Specific	ABAKI_c17240
ABK_TSS1101	Scaf1	1822203	-	-15956.2	P	Conserved	ABAKI_c17260
ABK_TSS1102	Scaf1	1825149	-	-458.301	P	Conditional	ABAKI_c17280
ABK_TSS1103	Scaf1	1825980	-	-174.225	P	Specific	ABAKI_c17290
ABK_TSS1104	Scaf1	1827829	-	-6.71652	P	Specific	ABAKI_c17310
ABK_TSS1105	Scaf1	1828158	-	-1354.11	N	Conserved	N/A
ABK_TSS1106	Scaf1	1835668	-	-249.222	P	Conditional	ABAKI_c17380
ABK_TSS1107	Scaf1	1839502	-	-5442.82	P	Conditional	ABAKI_c17420
ABK_TSS1108	Scaf1	1846294	-	-892.845	P	Conditional	ABAKI_c17500
ABK_TSS1109	Scaf1	1847000	-	-1347.7	P	Specific	ABAKI_c17510
ABK_TSS1110	Scaf1	1849971	-	-134.847	P	Specific	ABAKI_c17540
ABK_TSS1111	Scaf1	1851856	-	-2649.43	P	Conditional	ABAKI_c17560
ABK_TSS1112	Scaf1	1860481	-	-568.124	P	Specific	ABAKI_c17620
ABK_TSS1113	Scaf1	1862906	-	-3527.3	P	Conditional	ABAKI_c17640
ABK_TSS1114	Scaf1	1867508	-	-4395.26	P	Conditional	ABAKI_c17680
ABK_TSS1115	Scaf1	1871145	-	-77.0444	P	Specific	ABAKI_c17720
ABK_TSS1116	Scaf1	1871579	-	-12.5175	A	Specific	ABAKI_c17730
ABK_TSS1117	Scaf1	1877925	-	-98.9951	P	Specific	ABAKI_c17790
ABK_TSS1118	Scaf1	1880341	-	-54.9218	P	Conditional	ABAKI_c17830
ABK_TSS1119	Scaf1	1890219	-	-879.76	P	Specific	ABAKI_c17910
ABK_TSS1120	Scaf1	1894969	-	-204.564	P	Specific	ABAKI_c17960
ABK_TSS1121	Scaf1	1894994	-	-38.8316	S	Specific	ABAKI_c17960
ABK_TSS1122	Scaf1	1895919	-	-48357.3	P	Conserved	ABAKI_c17970
ABK_TSS1123	Scaf1	1898175	-	-9682.56	P	Conditional	ABAKI_c17990
ABK_TSS1124	Scaf1	1910144	-	-3177.69	P	Conditional	ABAKI_c18100
ABK_TSS1125	Scaf1	1925293	-	-221.511	P	Conditional	ABAKI_c18190
ABK_TSS1126	Scaf1	1928766	-	-11710.2	P	Conserved	ABAKI_c18210
ABK_TSS1127	Scaf1	1930878	-	-5752.59	P	Conditional	ABAKI_c18220
ABK_TSS1128	Scaf1	1932700	-	-227	P	Conditional	ABAKI_c18230
ABK_TSS1129	Scaf1	1936719	-	-650.365	P	Conditional	ABAKI_c18240
ABK_TSS1130	Scaf1	1943134	-	-74432.9	P	Conserved	ABAKI_c18290
ABK_TSS1131	Scaf1	1946707	-	-35376	P	Conditional	ABAKI_c18320
ABK_TSS1132	Scaf1	1951158	-	-448.228	P	Specific	ABAKI_c18360
ABK_TSS1133	Scaf1	1954708	-	-1006.72	P	Conditional	ABAKI_c18440
ABK_TSS1134	Scaf1	1958426	-	-28236.5	P	Conserved	ABAKI_c18480
ABK_TSS1135	Scaf1	1971964	-	-271.346	P	Specific	ABAKI_c18600
ABK_TSS1136	Scaf1	1977546	-	-342.005	P	Specific	ABAKI_c18630
ABK_TSS1137	Scaf1	1982247	-	-155.457	P	Specific	ABAKI_c18650
ABK_TSS1138	Scaf1	1983716	-	-116.96	P	Specific	ABAKI_c18660
ABK_TSS1139	Scaf1	1991138	-	-77.7316	P	Specific	ABAKI_c18730
ABK_TSS1140	Scaf1	1993098	-	-1260.05	P	Conditional	ABAKI_c18750
ABK_TSS1141	Scaf1	2009562	-	-321.362	P	Conditional	ABAKI_c18860
ABK_TSS1142	Scaf1	2018528	-	-343.08	P	Conditional	ABAKI_c18940
ABK_TSS1143	Scaf1	2018617	-	-190.597	S	Conditional	ABAKI_c18940
ABK_TSS1144	Scaf1	2030662	-	-600.37	P	Conditional	ABAKI_c19040
ABK_TSS1145	Scaf1	2031489	-	-217.001	P	Conditional	ABAKI_c19050
ABK_TSS1146	Scaf1	2033903	-	-340.131	P	Specific	ABAKI_c19070
ABK_TSS1147	Scaf1	2038963	-	-7156.42	P	Conserved	ABAKI_c19110
ABK_TSS1148	Scaf1	2041612	-	-11648.4	P	Conditional	ABAKI_c19130
ABK_TSS1149	Scaf1	2042943	-	-950.984	P	Conditional	ABAKI_c19150
ABK_TSS1150	Scaf1	2044493	-	-26.9878	P	Specific	ABAKI_c19160
ABK_TSS1151	Scaf1	2048935	-	-75.7556	A	Specific	ABAKI_c19210
ABK_TSS1152	Scaf1	2049883	-	-23.0322	A	Specific	ABAKI_c19210
ABK_TSS1153	Scaf1	2051151	-	-3285.04	P	Conditional	ABAKI_c19230
ABK_TSS1154	Scaf1	2057749	-	-280.663	P	Specific	ABAKI_c19300
ABK_TSS1155	Scaf1	2062498	-	-413.62	P	Specific	ABAKI_c19370
ABK_TSS1156	Scaf1	2063628	-	-528.42	P	Conditional	ABAKI_c19380
ABK_TSS1157	Scaf1	2064630	-	-97.2393	S	Specific	ABAKI_r00010
ABK_TSS1158	Scaf1	2069495	-	-326.741	S	Specific	ABAKI_r00030
ABK_TSS1159	Scaf1	2069524	-	-66.2622	S	Conditional	ABAKI_r00030
ABK_TSS1160	Scaf1	2070182	-	-2267.73	P	Conditional	ABAKI_c19390
ABK_TSS1161	Scaf1	2072100	-	-63.2187	S	Specific	ABAKI_r00010
ABK_TSS1162	Scaf1	2072290	-	-225.187	S	Conditional	ABAKI_r00010
ABK_TSS1163	Scaf1	2077155	-	-128.094	S	Conditional	ABAKI_r00030
ABK_TSS1164	Scaf1	2077184	-	-1515.69	P	Conserved	ABAKI_r00030
ABK_TSS1165	Scaf1	2077413	-	-308.161	P	Conditional	ABAKI_r00010
ABK_TSS1166	Scaf1	2079691	-	-228.332	P	Specific	ABAKI_c19440
ABK_TSS1167	Scaf1	2081708	-	-378.654	S	Specific	ABAKI_c19460
ABK_TSS1168	Scaf1	2081757	-	-11526.3	P	Conditional	ABAKI_c19460
ABK_TSS1169	Scaf1	2081842	-	-450.689	S	Specific	ABAKI_c19460
ABK_TSS1170	Scaf1	2084601	-	-227.468	P	Specific	ABAKI_c19490
ABK_TSS1171	Scaf1	2091330	-	-1169.83	P	Conditional	ABAKI_c19550
ABK_TSS1172	Scaf1	2092952	-	-2223.93	P	Conserved	ABAKI_c19560
ABK_TSS1173	Scaf1	2093005	-	-1397.22	S	Specific	ABAKI_c19560
ABK_TSS1174	Scaf1	2093026	-	-304.967	S	Conditional	ABAKI_c19560
ABK_TSS1175	Scaf1	2094284	-	-152.463	P	Conditional	ABAKI_c19580
ABK_TSS1176	Scaf1	2094433	-	-115.098	S	Specific	ABAKI_c19580
ABK_TSS1177	Scaf1	2096412	-	-14.636	P	Specific	ABAKI_c19610
ABK_TSS1178	Scaf1	2102752	-	-192.817	P	Conditional	ABAKI_c19660
ABK_TSS1179	Scaf1	2105798	-	-88.2772	P	Conditional	ABAKI_c19680
ABK_TSS1180	Scaf1	2128711	-	-209.529	P	Conditional	ABAKI_c19930
ABK_TSS1181	Scaf1	2147947	-	-659.591	P	Conditional	ABAKI_c20130
ABK_TSS1182	Scaf1	2154472	-	-363.418	P	Specific	ABAKI_c20190
ABK_TSS1183	Scaf1	2154620	-	-359.986	S	Conditional	ABAKI_c20190
ABK_TSS1184	Scaf1	2169474	-	-19.938	P	Specific	ABAKI_c20330
ABK_TSS1185	Scaf1	2172440	-	-3.16293	P	Specific	ABAKI_c20360
ABK_TSS1186	Scaf1	2262639	-	-143.013	A	Specific	ABAKI_c21070
ABK_TSS1187	Scaf1	2283612	-	-5.18439	P	Specific	ABAKI_c21290
ABK_TSS1188	Scaf1	2291142	-	-1660.48	P	Conditional	ABAKI_c21370
ABK_TSS1189	Scaf1	2301000	-	-77.6293	A	Specific	ABAKI_c21470
ABK_TSS1190	Scaf1	2329240	-	-55.135	A	Specific	ABAKI_c21700
ABK_TSS1191	Scaf1	2348401	-	-57.5506	P	Specific	ABAKI_c21870
ABK_TSS1192	Scaf1	2361776	-	-398.335	P	Conditional	ABAKI_c22000
ABK_TSS1193	Scaf1	2372267	-	-1037.76	P	Conditional	ABAKI_c22120
ABK_TSS1194	Scaf1	2373395	-	-1644.85	N	Specific	N/A
ABK_TSS1195	Scaf1	2376894	-	-1832.85	N	Specific	N/A
ABK_TSS1196	Scaf1	2381022	-	-8724.78	P	Conserved	ABAKI_c22210
ABK_TSS1197	Scaf1	2381475	-	-7853.69	P	Conserved	ABAKI_c22220
ABK_TSS1198	Scaf1	2407995	-	-420.669	P	Specific	ABAKI_c22470
ABK_TSS1199	Scaf1	2408007	-	-27.8787	S	Specific	ABAKI_c22470
ABK_TSS1200	Scaf1	2408249	-	-55.9914	S	Specific	ABAKI_c22470
ABK_TSS1201	Scaf1	2411645	-	-2960.96	P	Conserved	ABAKI_c22490
ABK_TSS1202	Scaf1	2427358	-	-514.635	P	Conditional	ABAKI_c22670
ABK_TSS1203	Scaf1	2472307	-	-339.122	P	Conditional	ABAKI_c23010
ABK_TSS1204	Scaf1	2482033	-	-581.472	P	Specific	ABAKI_c23110
ABK_TSS1205	Scaf1	2483984	-	-173.245	P	Conditional	ABAKI_c23130
ABK_TSS1206	Scaf1	2494188	-	-1085.26	P	Conditional	ABAKI_c23210
ABK_TSS1207	Scaf1	2495832	-	-1710.98	I	Specific	ABAKI_c23230
ABK_TSS1208	Scaf1	2503816	-	-489.26	P	Conditional	ABAKI_c23280
ABK_TSS1209	Scaf1	2508228	-	-321.432	P	Specific	ABAKI_c23320
ABK_TSS1210	Scaf1	2521097	-	-96.2511	P	Specific	ABAKI_c23420
ABK_TSS1211	Scaf1	2557327	-	-13611.6	P	Conditional	ABAKI_c23800
ABK_TSS1212	Scaf1	2561674	-	-250.575	P	Conditional	ABAKI_c23820
ABK_TSS1213	Scaf1	2588861	-	-1026.37	P	Specific	ABAKI_c24030
ABK_TSS1214	Scaf1	2590857	-	-168.624	P	Conditional	ABAKI_c24040
ABK_TSS1215	Scaf1	2594152	-	-76.8057	P	Conditional	ABAKI_c24080
ABK_TSS1216	Scaf1	2599391	-	-808.864	P	Conditional	ABAKI_c24110
ABK_TSS1217	Scaf1	2600771	-	-1987.33	N	Specific	N/A
ABK_TSS1218	Scaf1	2617164	-	-1665.92	P	Conditional	ABAKI_c24260
ABK_TSS1219	Scaf1	2622976	-	-1266.04	P	Specific	ABAKI_c24300
ABK_TSS1220	Scaf1	2623050	-	-6.72436	S	Conditional	ABAKI_c24300
ABK_TSS1221	Scaf1	2631354	-	-163.456	P	Specific	ABAKI_c24370
ABK_TSS1222	Scaf1	2631367	-	-96.0362	S	Specific	ABAKI_c24370
ABK_TSS1223	Scaf1	2641520	-	-144.163	A	Specific	ABAKI_c24460
ABK_TSS1224	Scaf1	2651514	-	-3.45947	A	Specific	ABAKI_c24520
ABK_TSS1225	Scaf1	2656941	-	-1110.14	P	Conserved	ABAKI_c24570
ABK_TSS1226	Scaf1	2659164	-	-1583.79	P	Conserved	ABAKI_c24590
ABK_TSS1227	Scaf1	2688065	-	-459.918	A	Specific	ABAKI_c24840
ABK_TSS1228	Scaf1	2706165	-	-8.36034	P	Specific	ABAKI_c24940
ABK_TSS1229	Scaf1	2733879	-	-22.604	P	Specific	ABAKI_c25090
ABK_TSS1230	Scaf1	2736122	-	-4917.34	P	Conditional	ABAKI_c25120
ABK_TSS1231	Scaf1	2736177	-	-211.916	S	Specific	ABAKI_c25120
ABK_TSS1232	Scaf1	2775661	-	-718.806	P	Conditional	ABAKI_c25650
ABK_TSS1233	Scaf1	2800409	-	-17.7825	P	Specific	ABAKI_c25830
ABK_TSS1234	Scaf1	2802606	-	-263.989	P	Conditional	ABAKI_c25850
ABK_TSS1235	Scaf1	2816139	-	-8.40063	P	Specific	ABAKI_c25980
ABK_TSS1236	Scaf1	2819331	-	-52.9193	P	Specific	ABAKI_c26000
ABK_TSS1237	Scaf1	2836606	-	-893.527	P	Specific	ABAKI_c26150
ABK_TSS1238	Scaf1	2837317	-	-2029.06	P	Conserved	ABAKI_c26160
ABK_TSS1239	Scaf1	2839112	-	-1595.02	P	Conditional	ABAKI_c26170
ABK_TSS1240	Scaf1	2848291	-	-4.44276	A	Specific	ABAKI_c26250
ABK_TSS1241	Scaf1	2872589	-	-203.962	P	Specific	ABAKI_c26440
ABK_TSS1242	Scaf1	2881486	-	-93.5829	S	Specific	ABAKI_c26520
ABK_TSS1243	Scaf1	2881753	-	-1195.63	P	Conditional	ABAKI_c26520
ABK_TSS1244	Scaf1	2903154	-	-557.391	P	Conserved	ABAKI_c26680
ABK_TSS1245	Scaf1	2916894	-	-1672.67	P	Conditional	ABAKI_c26770
ABK_TSS1246	Scaf1	2926480	-	-146.696	P	Specific	ABAKI_c26830
ABK_TSS1247	Scaf1	2959271	-	-29.6413	P	Specific	ABAKI_c27080
ABK_TSS1248	Scaf1	2963086	-	-1	P	Specific	ABAKI_c27120
ABK_TSS1249	Scaf1	2965545	-	-1243.42	S	Specific	ABAKI_c27150
ABK_TSS1250	Scaf1	2965720	-	-1512.99	P	Conserved	ABAKI_c27150
ABK_TSS1251	Scaf1	2973058	-	-3664.52	P	Conserved	ABAKI_c27240
ABK_TSS1252	Scaf1	3033919	-	-710.751	P	Specific	ABAKI_c27780
ABK_TSS1253	Scaf1	3036853	-	-310.608	I	Specific	ABAKI_c27810
ABK_TSS1254	Scaf1	3039460	-	-53297.8	P	Conserved	ABAKI_c27820
ABK_TSS1255	Scaf1	3046142	-	-1511.99	S	Conditional	ABAKI_c27890
ABK_TSS1256	Scaf1	3046198	-	-1865.79	P	Conserved	ABAKI_c27890
ABK_TSS1257	Scaf1	3047980	-	-3784.65	P	Conserved	ABAKI_c27910
ABK_TSS1258	Scaf1	3052942	-	-1619.81	P	Conserved	ABAKI_c27970
ABK_TSS1259	Scaf1	3054773	-	-353.929	P	Conditional	ABAKI_c28000
ABK_TSS1260	Scaf1	3062275	-	-3066.67	P	Conserved	ABAKI_c28090
ABK_TSS1261	Scaf1	3084642	-	-50.8263	P	Specific	ABAKI_c28270
ABK_TSS1262	Scaf1	3131959	-	-38.0459	P	Specific	ABAKI_c28740
ABK_TSS1263	Scaf1	3160527	-	-49.6724	P	Specific	ABAKI_c29010
ABK_TSS1264	Scaf1	3166704	-	-14143.9	N	Conserved	N/A
ABK_TSS1265	Scaf1	3180370	-	-132.875	P	Specific	ABAKI_c29190
ABK_TSS1266	Scaf1	3188946	-	-16646.1	P	Conserved	ABAKI_c29300
ABK_TSS1267	Scaf1	3220461	-	-428.377	A	Specific	ABAKI_c29600
ABK_TSS1268	Scaf1	3236914	-	-673.404	A	Specific	ABAKI_c29730
ABK_TSS1269	Scaf1	3241368	-	-91.7121	A	Specific	ABAKI_c29770
ABK_TSS1270	Scaf1	3245641	-	-140.333	P	Specific	ABAKI_c29810
ABK_TSS1271	Scaf1	3245908	-	-172.765	N	Specific	N/A
ABK_TSS1272	Scaf1	3259628	-	-26234.6	P	Conserved	ABAKI_c29950
ABK_TSS1273	Scaf1	3287324	-	-3922.42	P	Conditional	ABAKI_c30130
ABK_TSS1274	Scaf1	3320696	-	-1525.8	P	Specific	ABAKI_c30440
ABK_TSS1275	Scaf1	3322451	-	-3019.97	P	Conditional	ABAKI_c30460
ABK_TSS1276	Scaf1	3325464	-	-39.532	P	Specific	ABAKI_c30470
ABK_TSS1277	Scaf1	3326142	-	-13161	P	Conditional	ABAKI_c30480
ABK_TSS1278	Scaf1	3331678	-	-1732.4	P	Conditional	ABAKI_c30520
ABK_TSS1279	Scaf1	3333492	-	-247.282	P	Conditional	ABAKI_c30540
ABK_TSS1280	Scaf1	3333683	-	-196.892	S	Specific	ABAKI_c30540
ABK_TSS1281	Scaf1	3334961	-	-3105.53	P	Conserved	ABAKI_c30550
ABK_TSS1282	Scaf1	3337744	-	-1024.55	P	Conditional	ABAKI_c30570
ABK_TSS1283	Scaf1	3341080	-	-797.572	P	Conserved	ABAKI_c30610
ABK_TSS1284	Scaf1	3361458	-	-146.839	P	Conserved	ABAKI_c30780
ABK_TSS1285	Scaf1	3363837	-	-170.007	P	Specific	ABAKI_c30820
ABK_TSS1286	Scaf1	3372432	-	-235.232	P	Specific	ABAKI_c30870
ABK_TSS1287	Scaf1	3372437	-	-4.91779	S	Specific	ABAKI_c30870
ABK_TSS1288	Scaf1	3375236	-	-4539.54	P	Conditional	ABAKI_c30890
ABK_TSS1289	Scaf1	3377754	-	-226.735	P	Conditional	ABAKI_c30910
ABK_TSS1290	Scaf1	3380281	-	-123.414	P	Specific	ABAKI_c30940
ABK_TSS1291	Scaf1	3382304	-	-6754.73	P	Conserved	ABAKI_c30970
ABK_TSS1292	Scaf1	3401208	-	-412.218	P	Specific	ABAKI_c31130
ABK_TSS1293	Scaf1	3406561	-	-25912.9	P	Conserved	ABAKI_c31190
ABK_TSS1294	Scaf1	3406780	-	-831.167	S	Conditional	ABAKI_c31190
ABK_TSS1295	Scaf1	3407825	-	-32.5906	N	Specific	N/A
ABK_TSS1296	Scaf1	3428723	-	-249.14	P	Specific	ABAKI_c31390
ABK_TSS1297	Scaf1	3430558	-	-3753	P	Conserved	ABAKI_c31410
ABK_TSS1298	Scaf1	3432008	-	-157.605	P	Specific	ABAKI_c31430
ABK_TSS1299	Scaf1	3449645	-	-50.9359	P	Specific	ABAKI_c31560
ABK_TSS1300	Scaf1	3466394	-	-47.2415	P	Specific	ABAKI_c31760
ABK_TSS1301	Scaf1	3483144	-	-49.9239	P	Specific	ABAKI_c31960
ABK_TSS1302	Scaf1	3496659	-	-121.165	P	Specific	ABAKI_c32100
ABK_TSS1303	Scaf1	3508928	-	-56.9327	P	Specific	ABAKI_c32250
ABK_TSS1304	Scaf1	3520534	-	-55.1082	P	Conditional	ABAKI_c32350
ABK_TSS1305	Scaf1	3528173	-	-511.963	P	Specific	ABAKI_c32410
ABK_TSS1306	Scaf1	3529085	-	-22.6305	P	Specific	ABAKI_c32420
ABK_TSS1307	Scaf1	3530447	-	-261.941	P	Conditional	ABAKI_c32430
ABK_TSS1308	Scaf1	3535502	-	-5925.92	P	Conditional	ABAKI_c32480
ABK_TSS1309	Scaf1	3545708	-	-252.15	P	Conditional	ABAKI_c32550
ABK_TSS1310	Scaf1	3558672	-	-6571.02	P	Conditional	ABAKI_c32650
ABK_TSS1311	Scaf1	3564727	-	-4.27374	S	Specific	ABAKI_c32720
ABK_TSS1312	Scaf1	3564733	-	-3806.85	P	Specific	ABAKI_c32720
ABK_TSS1313	Scaf1	3598782	-	-832.933	P	Conserved	ABAKI_c32950
ABK_TSS1314	Scaf1	3612781	-	-927.057	P	Conditional	ABAKI_c33100
ABK_TSS1315	Scaf1	3614211	-	-18.6024	P	Specific	ABAKI_c33110
ABK_TSS1316	Scaf1	3635182	-	-32.0967	S	Specific	ABAKI_c33320
ABK_TSS1317	Scaf1	3635197	-	-166.997	P	Specific	ABAKI_c33320
ABK_TSS1318	Scaf1	3640876	-	-344.585	P	Conditional	ABAKI_c33360
ABK_TSS1319	Scaf1	3641777	-	-99.0532	P	Specific	ABAKI_c33370
ABK_TSS1320	Scaf1	3645616	-	-212.714	P	Specific	ABAKI_c33390
ABK_TSS1321	Scaf1	3656495	-	-27502.7	P	Conserved	ABAKI_c33490
ABK_TSS1322	Scaf1	3695331	-	-88.3054	P	Specific	ABAKI_c33820
ABK_TSS1323	Scaf1	3697929	-	-85.2905	P	Specific	ABAKI_c33850
ABK_TSS1324	Scaf1	3700543	-	-92.8559	P	Specific	ABAKI_c33870
ABK_TSS1325	Scaf1	3701706	-	-27.1547	P	Specific	ABAKI_c33880
ABK_TSS1326	Scaf1	3706527	-	-3330.34	P	Conditional	ABAKI_c33920
ABK_TSS1327	Scaf1	3716428	-	-3670.76	P	Conserved	ABAKI_c34000
ABK_TSS1328	Scaf1	3723903	-	-13278.8	P	Conserved	ABAKI_c34080
ABK_TSS1329	Scaf1	3736680	-	-188.682	P	Conditional	ABAKI_c34200
ABK_TSS1330	Scaf1	3740735	-	-20.3198	P	Conditional	ABAKI_c34230
ABK_TSS1331	Scaf1	3742419	-	-339.352	A	Conditional	ABAKI_c34250
ABK_TSS1332	Scaf1	3807048	-	-129.667	A	Specific	ABAKI_c34800
ABK_TSS1333	Scaf1	3820541	-	-46.255	A	Specific	ABAKI_c34920
ABK_TSS1334	Scaf1	3828775	-	-45.2099	N	Specific	N/A
ABK_TSS1335	Scaf1	3852079	-	-4.15873	P	Specific	ABAKI_c35230
ABK_TSS1336	Scaf1	3858027	-	-5.27891	P	Specific	ABAKI_c35280
ABK_TSS1337	Scaf1	3879485	-	-126.296	A	Specific	ABAKI_c35530
ABK_TSS1338	Scaf1	3880146	-	-29.7017	P	Specific	ABAKI_c35540
ABK_TSS1339	Scaf1	3894671	-	-197.02	P	Specific	ABAKI_c35670
ABK_TSS1340	Scaf1	3911785	-	-52.2578	I	Conditional	ABAKI_c35830
ABK_TSS1341	Scaf1	3912050	-	-176.282	P	Conditional	ABAKI_c35830
ABK_TSS1342	Scaf1	3919947	-	-86.8809	S	Specific	ABAKI_c35920
ABK_TSS1343	Scaf1	3920071	-	-142.502	P	Specific	ABAKI_c35920
ABK_TSS1344	Scaf1	3920848	-	-59.298	P	Specific	ABAKI_c35930
ABK_TSS1345	Scaf1	3923883	-	-26995.8	P	Conserved	ABAKI_c35970
ABK_TSS1346	Scaf1	3925058	-	-13.5711	P	Conditional	ABAKI_c35980
ABK_TSS1347	Scaf1	3926038	-	-16.0659	P	Specific	ABAKI_c35990
ABK_TSS1348	Scaf1	3954112	-	-962.403	P	Conditional	ABAKI_c36230
ABK_TSS1349	Scaf1	3955895	-	-908.118	P	Specific	ABAKI_c36250
ABK_TSS1350	Scaf1	3963747	-	-4.67857	P	Specific	ABAKI_c36310
ABK_TSS1351	Scaf1	3965402	-	-143.924	P	Specific	ABAKI_c36330
ABK_TSS1352	Scaf1	3966135	-	-3512.08	P	Conserved	ABAKI_c36350
ABK_TSS1353	Scaf1	3981984	-	-51.1837	P	Conditional	ABAKI_c36480
ABK_TSS1354	Scaf1	4031009	-	-40729.4	N	Conserved	N/A
ABK_TSS1355	Scaf1	4033769	-	-112.3	A	Specific	ABAKI_c36980
ABK_TSS1356	Scaf1	4034134	-	-10.4341	A	Specific	ABAKI_c36980
ABK_TSS1357	Scaf1	4042147	-	-46.8248	P	Specific	ABAKI_c37050
ABK_TSS1358	Scaf1	4072093	-	-2.5	P	Specific	ABAKI_c37350
ABK_TSS1359	Scaf1	4076887	-	-187.983	P	Specific	ABAKI_c37390
ABK_TSS1360	Scaf1	4080896	-	-389.218	S	Specific	ABAKI_c37460
ABK_TSS1361	Scaf1	4080901	-	-542.105	P	Specific	ABAKI_c37460
ABK_TSS1362	Scaf1	4106987	-	-736.314	P	Specific	ABAKI_c37660
ABK_TSS1363	Scaf1	4115910	-	-273.956	P	Specific	ABAKI_c37770
ABK_TSS1364	Scaf1	4127767	-	-469.727	P	Conditional	ABAKI_c37890
ABK_TSS1365	Scaf1	4131331	-	-480.021	P	Specific	ABAKI_c37930
ABK_TSS1366	Scaf1	4153691	-	-1553.75	P	Specific	ABAKI_c38140
ABK_TSS1367	Scaf1	4165487	-	-3742.66	P	Conditional	ABAKI_c38250
ABK_TSS1368	Scaf1	4179813	-	-85.0704	P	Specific	ABAKI_c38340
ABK_TSS1369	Scaf1	4189330	-	-62.3625	P	Specific	ABAKI_c38450
ABK_TSS1370	Scaf1	4189750	-	-26.9811	P	Specific	ABAKI_c38460
ABK_TSS1371	Scaf1	4190912	-	-610.398	P	Conditional	ABAKI_c38470
ABK_TSS1372	Scaf1	4242763	-	-624.525	P	Conditional	ABAKI_c38940
ABK_TSS1373	Scaf1	4253815	-	-350.17	P	Specific	ABAKI_c39100
ABK_TSS1374	Scaf1	4254505	-	-72.6458	S	Specific	ABAKI_c39110
ABK_TSS1375	Scaf1	4254597	-	-781.785	P	Conditional	ABAKI_c39110
ABK_TSS1376	Scaf1	4264213	-	-6.68447	A	Specific	ABAKI_c39190
ABK_TSS1377	Scaf1	4267862	-	-13.4794	P	Specific	ABAKI_c39250
ABK_TSS1378	Scaf1	4273679	-	-1882.73	P	Conditional	ABAKI_c39320
ABK_TSS1379	Scaf1	4275434	-	-964.033	P	Conditional	ABAKI_c39330
						ABAKI_n00020
