# Supplementary material for: Genome-scale analysis of Acetobacterium bakii reveals the cold adaptation of psychrotolerant acetogens by post-transcriptional regulation
Source: RNA. 2018 Dec;24(12):1839–55. doi: 10.1261/rna.068239.118 (PMC6239172; doi:10.1261/rna.068239.118)
Supplement: Supplemental Material [file supp_068239.118_Supplemental_Table_S7.xlsx]

## Sheet: Sheet1
Table S7. Operon of Acetobacterium bakii DSM 8239. The total operons were classified as 'DOOR2, TSS', or 'TSS' as described in MATERIALS AND METHODS section.
Operon	Strand	Source	Comment	Number of Genes	Genes in operon
1	+	TSS	pTSS for ABAKI_c00060	3	ABAKI_c00060	ABAKI_c00070	ABAKI_c00080
2	-	DOOR2, TSS		1	ABAKI_c00090
3	+	DOOR2, TSS		2	ABAKI_c00100	ABAKI_c00110
4	-	DOOR2, TSS		1	ABAKI_c00120
5	+	DOOR2, TSS		1	ABAKI_c00130
6	+	TSS	pTSS for ABAKI_c00140	2	ABAKI_c00130	ABAKI_c00140
7	+	TSS	pTSS for ABAKI_c00240	1	ABAKI_c00240
8	+	DOOR2, TSS		1	ABAKI_c00250
9	+	DOOR2, TSS		1	ABAKI_c00320
10	-	DOOR2, TSS		1	ABAKI_c00330
11	+	DOOR2, TSS		1	ABAKI_c00360
12	+	DOOR2, TSS		2	ABAKI_c00370	ABAKI_c00380
13	-	DOOR2, TSS		1	ABAKI_c00390
14	+	DOOR2, TSS		2	ABAKI_c00400	ABAKI_c00410
15	+	DOOR2, TSS		2	ABAKI_c00420	ABAKI_c00430
16	+	DOOR2, TSS		3	ABAKI_c00440	ABAKI_c00450	ABAKI_c00460
17	-	DOOR2, TSS		1	ABAKI_c00470
18	+	DOOR2, TSS		1	ABAKI_c00480
19	+	DOOR2, TSS		2	ABAKI_c00510	ABAKI_c00520
20	+	TSS	pTSS for ABAKI_c00520	1	ABAKI_c00520
21	+	TSS	pTSS for ABAKI_c00580	1	ABAKI_c00580
22	+	TSS	pTSS for ABAKI_c00590	1	ABAKI_c00590
23	+	DOOR2, TSS		1	ABAKI_c00600
24	-	DOOR2, TSS		1	ABAKI_c00610
25	+	DOOR2, TSS		2	ABAKI_c00620	ABAKI_c00630
26	+	DOOR2, TSS		2	ABAKI_c00640	ABAKI_c00650
27	+	DOOR2, TSS		2	ABAKI_c00660	ABAKI_c00670
28	+	DOOR2, TSS		3	ABAKI_c00720	ABAKI_c00730	ABAKI_c00740
29	+	TSS	pTSS for ABAKI_c00730	2	ABAKI_c00730	ABAKI_c00740
30	-	DOOR2, TSS		1	ABAKI_c00750
31	+	TSS	pTSS for ABAKI_c00770	1	ABAKI_c00770
32	+	DOOR2, TSS		2	ABAKI_c00780	ABAKI_c00790
33	+	TSS	pTSS for ABAKI_c00790	2	ABAKI_c00790	ABAKI_c00800
34	-	DOOR2, TSS		1	ABAKI_c00820
35	+	DOOR2, TSS		3	ABAKI_c00830	ABAKI_c00840	ABAKI_c00850
36	-	DOOR2, TSS		1	ABAKI_c00880
37	+	DOOR2, TSS		2	ABAKI_c00890	ABAKI_c00900
38	-	DOOR2, TSS		1	ABAKI_c00910
39	+	DOOR2, TSS		1	ABAKI_c00920
40	+	DOOR2, TSS		1	ABAKI_c00930
41	-	DOOR2, TSS		1	ABAKI_c00940
42	+	DOOR2, TSS		3	ABAKI_c00950	ABAKI_c00960	ABAKI_c00970
43	+	TSS	pTSS for ABAKI_c00970	1	ABAKI_c00970
44	+	DOOR2, TSS		5	ABAKI_c00990	ABAKI_c01000	ABAKI_c01010	ABAKI_c01020	ABAKI_c01030
45	+	TSS	pTSS for ABAKI_c01020	1	ABAKI_c01020
46	-	DOOR2, TSS		1	ABAKI_c01040
47	+	DOOR2, TSS		2	ABAKI_c01050	ABAKI_c01060
48	-	DOOR2, TSS		1	ABAKI_c01070
49	+	DOOR2, TSS		2	ABAKI_c01080	ABAKI_c01090
50	+	TSS	pTSS for ABAKI_c01090	1	ABAKI_c01090
51	+	TSS	pTSS for ABAKI_c01150	1	ABAKI_c01150
52	+	DOOR2, TSS		2	ABAKI_c01160	ABAKI_c01170
53	+	DOOR2, TSS		2	ABAKI_c01190	ABAKI_c01200
54	+	DOOR2, TSS		6	ABAKI_c01230	ABAKI_c01240	ABAKI_c01250	ABAKI_c01260	ABAKI_c01270	ABAKI_c01280
55	-	TSS	pTSS for ABAKI_c01300	2	ABAKI_c01290	ABAKI_c01300
56	+	DOOR2, TSS		2	ABAKI_c01320	ABAKI_c01330
57	+	DOOR2, TSS		2	ABAKI_c01340	ABAKI_c01350
58	-	DOOR2, TSS		2	ABAKI_c01360	ABAKI_c01370
59	+	DOOR2, TSS		1	ABAKI_c01380
60	-	DOOR2, TSS		1	ABAKI_c01390
61	+	DOOR2, TSS		2	ABAKI_c01430	ABAKI_c01440
62	+	TSS	pTSS for ABAKI_c01440	1	ABAKI_c01440
63	+	DOOR2, TSS		1	ABAKI_c01450
64	-	DOOR2, TSS		4	ABAKI_c01480	ABAKI_c01490	ABAKI_c01500	ABAKI_c01510
65	+	DOOR2, TSS		1	ABAKI_c01520
66	-	TSS	pTSS for ABAKI_c01540	2	ABAKI_c01530	ABAKI_c01540
67	+	DOOR2, TSS		5	ABAKI_c01550	ABAKI_c01560	ABAKI_c01570	ABAKI_c01580	ABAKI_c01590
68	+	TSS	pTSS for ABAKI_c01560	1	ABAKI_c01560
69	+	DOOR2, TSS		15	ABAKI_c01670	ABAKI_c01680	ABAKI_c01690	ABAKI_c01700	ABAKI_c01710	ABAKI_c01720	ABAKI_c01730	ABAKI_c01740	ABAKI_c01750	ABAKI_c01760	ABAKI_c01770	ABAKI_c01780	ABAKI_c01790	ABAKI_c01800	ABAKI_c01810
70	+	TSS	pTSS for ABAKI_c01690	2	ABAKI_c01690	ABAKI_c01700
71	+	TSS	pTSS for ABAKI_c01710	2	ABAKI_c01710	ABAKI_c01720
72	+	TSS	pTSS for ABAKI_c01730	6	ABAKI_c01730	ABAKI_c01740	ABAKI_c01750	ABAKI_c01760	ABAKI_c01770	ABAKI_c01780
73	+	TSS	pTSS for ABAKI_c01790	3	ABAKI_c01790	ABAKI_c01800	ABAKI_c01810
74	+	DOOR2, TSS		6	ABAKI_c01870	ABAKI_c01880	ABAKI_c01890	ABAKI_c01900	ABAKI_c01910	ABAKI_c01920
75	+	TSS	pTSS for ABAKI_c01900	3	ABAKI_c01900	ABAKI_c01910	ABAKI_c01920
76	+	TSS	pTSS for ABAKI_c01960	1	ABAKI_c01960
77	-	DOOR2, TSS		2	ABAKI_c01970	ABAKI_c01980
78	+	DOOR2, TSS		4	ABAKI_c02080	ABAKI_c02090	ABAKI_c02100	ABAKI_c02110
79	-	TSS	pTSS for ABAKI_c02140	3	ABAKI_c02120	ABAKI_c02130	ABAKI_c02140
80	-	TSS	pTSS for ABAKI_c02180	1	ABAKI_c02180
81	-	TSS	pTSS for ABAKI_c02250	5	ABAKI_c02210	ABAKI_c02220	ABAKI_c02230	ABAKI_c02240	ABAKI_c02250
82	-	TSS	pTSS for ABAKI_c02290	4	ABAKI_c02260	ABAKI_c02270	ABAKI_c02280	ABAKI_c02290
83	-	TSS	pTSS for ABAKI_c02310	2	ABAKI_c02300	ABAKI_c02310
84	-	DOOR2, TSS		1	ABAKI_c02320
85	-	TSS	pTSS for ABAKI_c02360	5	ABAKI_t00010	ABAKI_c02330	ABAKI_c02340	ABAKI_c02350	ABAKI_c02360
86	-	TSS	pTSS for ABAKI_c02400	4	ABAKI_c02370	ABAKI_c02380	ABAKI_c02390	ABAKI_c02400
87	-	TSS	pTSS for ABAKI_c02440	4	ABAKI_c02410	ABAKI_c02420	ABAKI_c02430	ABAKI_c02440
88	-	TSS	pTSS for ABAKI_c02500	6	ABAKI_c02450	ABAKI_c02460	ABAKI_c02470	ABAKI_c02480	ABAKI_c02490	ABAKI_c02500
89	-	TSS	pTSS for ABAKI_c02560	4	ABAKI_c02530	ABAKI_c02540	ABAKI_c02550	ABAKI_c02560
90	-	TSS	pTSS for ABAKI_c02580	2	ABAKI_c02570	ABAKI_c02580
91	-	TSS	pTSS for ABAKI_c02610	3	ABAKI_c02590	ABAKI_c02600	ABAKI_c02610
92	-	TSS	pTSS for ABAKI_c02680	5	ABAKI_c02640	ABAKI_c02650	ABAKI_c02660	ABAKI_c02670	ABAKI_c02680
93	-	DOOR2, TSS		2	ABAKI_c02720	ABAKI_c02730
94	-	DOOR2, TSS		2	ABAKI_c02750	ABAKI_c02760
95	-	TSS	pTSS for ABAKI_c02760	4	ABAKI_c02760	ABAKI_c02770	ABAKI_c02780	ABAKI_c02790
96	+	DOOR2, TSS		2	ABAKI_c02800	ABAKI_c02810
97	-	TSS	pTSS for ABAKI_c02830	2	ABAKI_c02820	ABAKI_c02830
98	-	TSS	pTSS for ABAKI_c02850	2	ABAKI_c02840	ABAKI_c02850
99	-	TSS	pTSS for ABAKI_c02870	2	ABAKI_c02860	ABAKI_c02870
100	+	DOOR2, TSS		2	ABAKI_c02880	ABAKI_c02890
101	-	TSS	pTSS for ABAKI_c02940	5	ABAKI_c02900	ABAKI_c02910	ABAKI_c02920	ABAKI_c02930	ABAKI_c02940
102	+	DOOR2, TSS		1	ABAKI_c02950
103	+	DOOR2, TSS		1	ABAKI_c02960
104	+	DOOR2, TSS		3	ABAKI_c02970	ABAKI_c02980	ABAKI_c02990
105	-	DOOR2, TSS		1	ABAKI_c03000
106	-	DOOR2, TSS		4	ABAKI_c03020	ABAKI_c03030	ABAKI_c03040	ABAKI_c03050
107	-	TSS	pTSS for ABAKI_c03050	1	ABAKI_c03050
108	-	DOOR2, TSS		4	ABAKI_c03060	ABAKI_c03070	ABAKI_c03080	ABAKI_c03090
109	-	TSS	pTSS for ABAKI_c03160	7	ABAKI_c03100	ABAKI_c03110	ABAKI_c03120	ABAKI_c03130	ABAKI_c03140	ABAKI_c03150	ABAKI_c03160
110	+	DOOR2, TSS		4	ABAKI_c03170	ABAKI_c03180	ABAKI_c03190	ABAKI_c03200
111	+	TSS	pTSS for ABAKI_c03180	3	ABAKI_c03180	ABAKI_c03190	ABAKI_c03200
112	-	DOOR2, TSS		10	ABAKI_c03210	ABAKI_c03220	ABAKI_c03230	ABAKI_c03240	ABAKI_c03250	ABAKI_c03260	ABAKI_c03270	ABAKI_c03280	ABAKI_c03290	ABAKI_c03300
113	+	DOOR2, TSS		2	ABAKI_c03310	ABAKI_c03320
114	-	DOOR2, TSS		1	ABAKI_r00020
115	-	TSS	pTSS for ABAKI_t00140	1	ABAKI_t00140
116	-	TSS	pTSS for ABAKI_c03340	1	ABAKI_c03340
117	-	TSS	pTSS for ABAKI_c03350	1	ABAKI_c03350
118	-	TSS	pTSS for ABAKI_c03390	2	ABAKI_c03380	ABAKI_c03390
119	-	TSS	pTSS for ABAKI_c03410	3	ABAKI_c03400	ABAKI_c03410	ABAKI_c03420
120	-	TSS	pTSS for ABAKI_c03420	1	ABAKI_c03420
121	-	DOOR2, TSS		1	ABAKI_c03430
122	-	DOOR2, TSS		1	ABAKI_c03440
123	-	DOOR2, TSS		4	ABAKI_c03450	ABAKI_c03460	ABAKI_c03470	ABAKI_c03480
124	+	DOOR2, TSS		1	ABAKI_c03490
125	-	DOOR2, TSS		18	ABAKI_c03500	ABAKI_c03510	ABAKI_c03520	ABAKI_c03530	ABAKI_c03540	ABAKI_c03550	ABAKI_c03560	ABAKI_c03570	ABAKI_c03580	ABAKI_c03590	ABAKI_c03600	ABAKI_c03610	ABAKI_c03620	ABAKI_c03630	ABAKI_c03640	ABAKI_c03650	ABAKI_c03660	ABAKI_c03670
126	-	TSS	pTSS for ABAKI_c03520	3	ABAKI_c03500	ABAKI_c03510	ABAKI_c03520
127	-	TSS	pTSS for ABAKI_c03540	2	ABAKI_c03530	ABAKI_c03540
128	-	TSS	iTSS for ABAKI_c03560	2	ABAKI_c03550	ABAKI_c03560
129	-	TSS	pTSS for ABAKI_c03570	1	ABAKI_c03570
130	-	TSS	pTSS for ABAKI_c03600	3	ABAKI_c03580	ABAKI_c03590	ABAKI_c03600
131	-	TSS	pTSS for ABAKI_c03640	4	ABAKI_c03610	ABAKI_c03620	ABAKI_c03630	ABAKI_c03640
132	-	TSS	pTSS for ABAKI_c03670	3	ABAKI_c03650	ABAKI_c03660	ABAKI_c03670
133	+	DOOR2, TSS		2	ABAKI_c03680	ABAKI_c03690
134	-	DOOR2, TSS		4	ABAKI_c03700	ABAKI_c03710	ABAKI_c03720	ABAKI_c03730
135	+	DOOR2, TSS		2	ABAKI_c03740	ABAKI_c03750
136	+	DOOR2, TSS		1	ABAKI_c03780
137	-	DOOR2, TSS		2	ABAKI_c03790	ABAKI_c03800
138	-	TSS	pTSS for ABAKI_c03800	1	ABAKI_c03800
139	+	DOOR2, TSS		1	ABAKI_c03870
140	-	TSS	pTSS for ABAKI_c04200	2	ABAKI_c04190	ABAKI_c04200
141	-	TSS	pTSS for ABAKI_c04250	5	ABAKI_c04210	ABAKI_c04220	ABAKI_c04230	ABAKI_c04240	ABAKI_c04250
142	-	TSS	pTSS for ABAKI_c04330	9	ABAKI_c04260	ABAKI_c04270	ABAKI_c04280	ABAKI_c04290	ABAKI_c04300	ABAKI_c04310	ABAKI_c04320	ABAKI_c04330	ABAKI_c04340
143	-	DOOR2, TSS		2	ABAKI_c04350	ABAKI_c04360
144	-	DOOR2, TSS		5	ABAKI_c04380	ABAKI_c04390	ABAKI_c04400	ABAKI_c04410	ABAKI_c04420
145	-	DOOR2, TSS		1	ABAKI_c04430
146	-	DOOR2, TSS		1	ABAKI_c04440
147	-	TSS	pTSS for ABAKI_c04490	5	ABAKI_c04450	ABAKI_c04460	ABAKI_c04470	ABAKI_c04480	ABAKI_c04490
148	-	DOOR2, TSS		1	ABAKI_c04600
149	-	DOOR2, TSS		5	ABAKI_c04630	ABAKI_c04640	ABAKI_c04650	ABAKI_c04660	ABAKI_c04670
150	-	TSS	pTSS for ABAKI_c04670	1	ABAKI_c04670
151	-	DOOR2, TSS		1	ABAKI_c04690
152	-	DOOR2, TSS		8	ABAKI_c04700	ABAKI_c04710	ABAKI_c04720	ABAKI_c04730	ABAKI_c04740	ABAKI_c04750	ABAKI_c04760	ABAKI_c04770
153	-	TSS	pTSS for ABAKI_c04710	2	ABAKI_c04700	ABAKI_c04710
154	-	TSS	pTSS for ABAKI_c04720	1	ABAKI_c04720
155	-	TSS	pTSS for ABAKI_c04760	4	ABAKI_c04730	ABAKI_c04740	ABAKI_c04750	ABAKI_c04760
156	-	TSS	pTSS for ABAKI_c04770	1	ABAKI_c04770
157	-	DOOR2, TSS		2	ABAKI_c04790	ABAKI_c04800
158	-	DOOR2, TSS		1	ABAKI_c04810
159	-	DOOR2, TSS		4	ABAKI_c04830	ABAKI_t00150	ABAKI_t00160	ABAKI_t00170
160	-	DOOR2, TSS		7	ABAKI_c04840	ABAKI_c04850	ABAKI_c04860	ABAKI_c04870	ABAKI_c04880	ABAKI_c04890	ABAKI_c04900
161	-	TSS	iTSS for ABAKI_c04840	1	ABAKI_c04840
162	-	TSS	pTSS for ABAKI_c04860	2	ABAKI_c04850	ABAKI_c04860
163	-	TSS	pTSS for ABAKI_c04870	1	ABAKI_c04870
164	-	TSS	pTSS for ABAKI_c04880	1	ABAKI_c04880
165	-	TSS	pTSS for ABAKI_c04900	2	ABAKI_c04890	ABAKI_c04900
166	+	DOOR2, TSS		3	ABAKI_c04910	ABAKI_c04920	ABAKI_c04930
167	-	DOOR2, TSS		2	ABAKI_c04940	ABAKI_c04950
168	-	DOOR2, TSS		5	ABAKI_c04960	ABAKI_c04970	ABAKI_c04980	ABAKI_c04990	ABAKI_c05000
169	-	TSS	pTSS for ABAKI_c04990	4	ABAKI_c04960	ABAKI_c04970	ABAKI_c04980	ABAKI_c04990
170	-	TSS	pTSS for ABAKI_c05000	1	ABAKI_c05000
171	+	DOOR2, TSS		1	ABAKI_c05010
172	+	DOOR2, TSS		2	ABAKI_c05020	ABAKI_c05030
173	-	DOOR2, TSS		20	ABAKI_c05040	ABAKI_c05050	ABAKI_c05060	ABAKI_c05070	ABAKI_c05080	ABAKI_c05090	ABAKI_c05100	ABAKI_c05110	ABAKI_c05120	ABAKI_c05130	ABAKI_c05140	ABAKI_c05150	ABAKI_c05160	ABAKI_c05170	ABAKI_c05180	ABAKI_c05190	ABAKI_c05200	ABAKI_c05210	ABAKI_c05220	ABAKI_c05230
174	+	DOOR2, TSS		1	ABAKI_c05240
175	-	DOOR2, TSS		2	ABAKI_c05250	ABAKI_c05260
176	-	DOOR2, TSS		2	ABAKI_c05270	ABAKI_c05280
177	-	TSS	pTSS for ABAKI_c05310	2	ABAKI_c05300	ABAKI_c05310
178	-	TSS	pTSS for ABAKI_c05330	4	ABAKI_c05300	ABAKI_c05310	ABAKI_c05320	ABAKI_c05330
179	-	DOOR2, TSS		6	ABAKI_c05380	ABAKI_c05390	ABAKI_c05400	ABAKI_c05410	ABAKI_c05420	ABAKI_c05430
180	+	DOOR2, TSS		1	ABAKI_c05440
181	-	TSS	pTSS for ABAKI_c05460	2	ABAKI_c05450	ABAKI_c05460
182	-	DOOR2, TSS		1	ABAKI_c05470
183	+	DOOR2, TSS		1	ABAKI_c05480
184	-	DOOR2, TSS		2	ABAKI_c05530	ABAKI_c05540
185	+	DOOR2, TSS		2	ABAKI_c05560	ABAKI_c05570
186	-	DOOR2, TSS		3	ABAKI_c05580	ABAKI_c05590	ABAKI_c05600
187	-	TSS	pTSS for ABAKI_c05590	2	ABAKI_c05580	ABAKI_c05590
188	-	TSS	pTSS for ABAKI_c05600	1	ABAKI_c05600
189	-	DOOR2, TSS		1	ABAKI_c05640
190	-	DOOR2, TSS		7	ABAKI_c05650	ABAKI_c05660	ABAKI_c05670	ABAKI_c05680	ABAKI_c05690	ABAKI_c05700	ABAKI_c05710
191	-	TSS	pTSS for ABAKI_c05670	3	ABAKI_c05650	ABAKI_c05660	ABAKI_c05670
192	-	TSS	iTSS for ABAKI_c05670	3	ABAKI_c05650	ABAKI_c05660	ABAKI_c05670
193	-	TSS	pTSS for ABAKI_c05680	2	ABAKI_c05670	ABAKI_c05680
194	-	TSS	pTSS for ABAKI_c05700	1	ABAKI_c05700
195	-	TSS	pTSS for ABAKI_c05710	1	ABAKI_c05710
196	-	TSS	pTSS for ABAKI_c05830	7	ABAKI_c05770	ABAKI_c05780	ABAKI_c05790	ABAKI_c05800	ABAKI_c05810	ABAKI_c05820	ABAKI_c05830
197	-	TSS	pTSS for ABAKI_c05830	3	ABAKI_c05810	ABAKI_c05820	ABAKI_c05830
198	+	DOOR2, TSS		2	ABAKI_c05840	ABAKI_c05850
199	+	DOOR2, TSS		1	ABAKI_c05860
200	-	DOOR2, TSS		3	ABAKI_c05870	ABAKI_c05880	ABAKI_c05890
201	-	TSS	pTSS for ABAKI_c05940	6	ABAKI_c05900	ABAKI_c05910	ABAKI_c05920	ABAKI_c05930	ABAKI_c05940	ABAKI_c05950
202	-	DOOR2, TSS		6	ABAKI_c05960	ABAKI_c05970	ABAKI_c05980	ABAKI_c05990	ABAKI_c06000	ABAKI_c06010
203	-	DOOR2, TSS		3	ABAKI_c06020	ABAKI_c06030	ABAKI_c06040
204	-	TSS	pTSS for ABAKI_c06060	2	ABAKI_c06050	ABAKI_c06060
205	-	TSS	pTSS for ABAKI_c06070	1	ABAKI_c06070
206	-	DOOR2, TSS		1	ABAKI_c06090
207	+	DOOR2, TSS		1	ABAKI_c06100
208	-	TSS	pTSS for ABAKI_c06140	2	ABAKI_c06130	ABAKI_c06140
209	-	TSS	pTSS for ABAKI_c06280	4	ABAKI_c06250	ABAKI_c06260	ABAKI_c06270	ABAKI_c06280
210	-	TSS	pTSS for ABAKI_c06390	2	ABAKI_c06380	ABAKI_c06390
211	-	DOOR2, TSS		1	ABAKI_c06400
212	-	DOOR2, TSS		5	ABAKI_c06410	ABAKI_c06420	ABAKI_c06430	ABAKI_c06440	ABAKI_c06450
213	-	DOOR2, TSS		3	ABAKI_c06460	ABAKI_c06470	ABAKI_c06480
214	-	DOOR2, TSS		3	ABAKI_c06490	ABAKI_c06500	ABAKI_c06510
215	-	TSS	pTSS for ABAKI_c06540	2	ABAKI_c06530	ABAKI_c06540
216	-	DOOR2, TSS		3	ABAKI_c06560	ABAKI_c06570	ABAKI_c06580
217	-	DOOR2, TSS		3	ABAKI_c06590	ABAKI_c06600	ABAKI_c06610
218	-	DOOR2, TSS		1	ABAKI_c06620
219	-	DOOR2, TSS		1	ABAKI_c06630
220	-	DOOR2, TSS		1	ABAKI_c06650
221	-	DOOR2, TSS		6	ABAKI_c06660	ABAKI_c06670	ABAKI_c06680	ABAKI_c06690	ABAKI_c06700	ABAKI_c06710
222	-	TSS	pTSS for ABAKI_c06690	4	ABAKI_c06660	ABAKI_c06670	ABAKI_c06680	ABAKI_c06690
223	-	TSS	pTSS for ABAKI_c06710	2	ABAKI_c06700	ABAKI_c06710
224	-	DOOR2, TSS		3	ABAKI_c06720	ABAKI_c06730	ABAKI_c06740
225	-	TSS	pTSS for ABAKI_c06730	2	ABAKI_c06720	ABAKI_c06730
226	-	TSS	pTSS for ABAKI_c06740	1	ABAKI_c06740
227	-	DOOR2, TSS		19	ABAKI_c06750	ABAKI_c06760	ABAKI_c06770	ABAKI_c06780	ABAKI_c06790	ABAKI_c06800	ABAKI_c06810	ABAKI_c06820	ABAKI_c06830	ABAKI_c06840	ABAKI_c06850	ABAKI_c06860	ABAKI_c06870	ABAKI_c06880	ABAKI_c06890	ABAKI_c06900	ABAKI_c06910	ABAKI_c06920	ABAKI_c06930
228	-	TSS	iTSS for ABAKI_c06750	1	ABAKI_c06750
229	-	TSS	iTSS for ABAKI_c06780	4	ABAKI_c06750	ABAKI_c06760	ABAKI_c06770	ABAKI_c06780
230	-	TSS	pTSS for ABAKI_c06930	15	ABAKI_c06790	ABAKI_c06800	ABAKI_c06810	ABAKI_c06820	ABAKI_c06830	ABAKI_c06840	ABAKI_c06850	ABAKI_c06860	ABAKI_c06870	ABAKI_c06880	ABAKI_c06890	ABAKI_c06900	ABAKI_c06910	ABAKI_c06920	ABAKI_c06930
231	-	DOOR2, TSS		2	ABAKI_c06940	ABAKI_c06950
232	-	TSS	pTSS for ABAKI_c07160	3	ABAKI_c07140	ABAKI_c07150	ABAKI_c07160
233	-	DOOR2, TSS		2	ABAKI_c07170	ABAKI_c07180
234	-	DOOR2, TSS		2	ABAKI_c07210	ABAKI_c07220
235	-	DOOR2, TSS		3	ABAKI_c07230	ABAKI_c07240	ABAKI_c07250
236	-	DOOR2, TSS		2	ABAKI_c07380	ABAKI_c07390
237	-	DOOR2, TSS		2	ABAKI_c07420	ABAKI_c07430
238	-	DOOR2, TSS		9	ABAKI_c07440	ABAKI_c07450	ABAKI_c07460	ABAKI_c07470	ABAKI_c07480	ABAKI_c07490	ABAKI_c07500	ABAKI_c07510	ABAKI_c07520
239	+	DOOR2, TSS		1	ABAKI_c07530
240	-	DOOR2, TSS		6	ABAKI_c07540	ABAKI_c07550	ABAKI_c07560	ABAKI_c07570	ABAKI_c07580	ABAKI_c07590
241	-	DOOR2, TSS		4	ABAKI_c07600	ABAKI_c07610	ABAKI_c07620	ABAKI_c07630
242	-	TSS	pTSS for ABAKI_c07610	2	ABAKI_c07600	ABAKI_c07610
243	-	TSS	pTSS for ABAKI_c07630	1	ABAKI_c07630
244	+	DOOR2, TSS		1	ABAKI_c07640
245	-	DOOR2, TSS		15	ABAKI_c07650	ABAKI_c07660	ABAKI_c07670	ABAKI_c07680	ABAKI_c07690	ABAKI_c07700	ABAKI_c07710	ABAKI_c07720	ABAKI_c07730	ABAKI_c07740	ABAKI_c07750	ABAKI_c07760	ABAKI_c07770	ABAKI_c07780	ABAKI_c07790
246	-	TSS	pTSS for ABAKI_c07750	2	ABAKI_c07740	ABAKI_c07750
247	-	TSS	pTSS for ABAKI_c07760	1	ABAKI_c07760
248	-	TSS	pTSS for ABAKI_c07790	2	ABAKI_c07780	ABAKI_c07790
249	-	TSS	pTSS for ABAKI_c07830	2	ABAKI_c07820	ABAKI_c07830
250	-	DOOR2, TSS		1	ABAKI_c07960
251	+	DOOR2, TSS		2	ABAKI_c07990	ABAKI_c08000
252	-	DOOR2, TSS		2	ABAKI_c08010	ABAKI_c08020
253	-	TSS	pTSS for ABAKI_c08050	3	ABAKI_c08030	ABAKI_c08040	ABAKI_c08050
254	-	DOOR2, TSS		5	ABAKI_c08070	ABAKI_c08080	ABAKI_c08090	ABAKI_c08100	ABAKI_c08110
255	+	DOOR2, TSS		5	ABAKI_c08120	ABAKI_c08130	ABAKI_c08140	ABAKI_c08150	ABAKI_c08160
256	-	DOOR2, TSS		2	ABAKI_c08170	ABAKI_c08180
257	-	DOOR2, TSS		5	ABAKI_c08190	ABAKI_c08200	ABAKI_c08210	ABAKI_c08220	ABAKI_c08230
258	-	TSS	pTSS for ABAKI_c08200	2	ABAKI_c08190	ABAKI_c08200
259	-	TSS	pTSS for ABAKI_c08230	3	ABAKI_c08210	ABAKI_c08220	ABAKI_c08230
260	-	DOOR2, TSS		1	ABAKI_c08280
261	+	DOOR2, TSS		1	ABAKI_c08290
262	-	DOOR2, TSS		1	ABAKI_c08310
263	+	DOOR2, TSS		2	ABAKI_c08350	ABAKI_c08360
264	-	DOOR2, TSS		2	ABAKI_c08650	ABAKI_c08660
265	+	DOOR2, TSS		1	ABAKI_c08670
266	-	TSS	pTSS for ABAKI_c08720	3	ABAKI_c08700	ABAKI_c08710	ABAKI_c08720
267	-	DOOR2, TSS		4	ABAKI_c08730	ABAKI_c08740	ABAKI_c08750	ABAKI_c08760
268	-	DOOR2, TSS		2	ABAKI_c08790	ABAKI_c08800
269	-	DOOR2, TSS		1	ABAKI_c08810
270	-	TSS	pTSS for ABAKI_c08850	1	ABAKI_c08850
271	-	DOOR2, TSS		6	ABAKI_c08860	ABAKI_c08870	ABAKI_c08880	ABAKI_c08890	ABAKI_c08900	ABAKI_c08910
272	-	TSS	pTSS for ABAKI_c08880	3	ABAKI_c08860	ABAKI_c08870	ABAKI_c08880
273	-	TSS	pTSS for ABAKI_c08910	3	ABAKI_c08890	ABAKI_c08900	ABAKI_c08910
274	-	DOOR2, TSS		7	ABAKI_c08920	ABAKI_c08930	ABAKI_c08940	ABAKI_c08950	ABAKI_c08960	ABAKI_c08970	ABAKI_c08980
275	-	DOOR2, TSS		1	ABAKI_c09000
276	-	DOOR2, TSS		1	ABAKI_c09010
277	-	DOOR2, TSS		3	ABAKI_c09040	ABAKI_c09050	ABAKI_c09060
278	-	DOOR2, TSS		3	ABAKI_c09070	ABAKI_c09080	ABAKI_c09090
279	-	DOOR2, TSS		5	ABAKI_c09070	ABAKI_c09080	ABAKI_c09090	ABAKI_c09100	ABAKI_c09110
280	+	DOOR2, TSS		1	ABAKI_c09140
281	-	DOOR2, TSS		7	ABAKI_c09150	ABAKI_c09160	ABAKI_c09170	ABAKI_c09180	ABAKI_c09190	ABAKI_c09200	ABAKI_c09210
282	-	DOOR2, TSS		1	ABAKI_c09220
283	-	DOOR2, TSS		2	ABAKI_c09280	ABAKI_c09290
284	+	DOOR2, TSS		1	ABAKI_c09300
285	-	DOOR2, TSS		4	ABAKI_c09310	ABAKI_c09320	ABAKI_c09330	ABAKI_c09340
286	-	TSS	pTSS for ABAKI_c09370	1	ABAKI_c09370
287	+	DOOR2, TSS		1	ABAKI_c09380
288	-	DOOR2, TSS		3	ABAKI_c09450	ABAKI_c09460	ABAKI_c09470
289	-	DOOR2, TSS		3	ABAKI_c09490	ABAKI_c09500	ABAKI_c09510
290	-	DOOR2, TSS		1	ABAKI_c09520
291	+	DOOR2, TSS		2	ABAKI_c09610	ABAKI_c09620
292	-	TSS	pTSS for ABAKI_c09650	1	ABAKI_c09650
293	-	TSS	pTSS for ABAKI_c09670	2	ABAKI_c09660	ABAKI_c09670
294	-	TSS	pTSS for ABAKI_c09710	4	ABAKI_c09680	ABAKI_c09690	ABAKI_c09700	ABAKI_c09710
295	-	DOOR2, TSS		1	ABAKI_c09720
296	-	TSS	pTSS for ABAKI_c09730	1	ABAKI_c09730
297	+	DOOR2, TSS		1	ABAKI_c09740
298	-	DOOR2, TSS		5	ABAKI_c09750	ABAKI_c09760	ABAKI_c09770	ABAKI_c09780	ABAKI_c09790
299	-	DOOR2, TSS		1	ABAKI_c09800
300	+	TSS	pTSS for ABAKI_c09830	1	ABAKI_c09830
301	-	DOOR2, TSS		1	ABAKI_c09840
302	-	TSS	pTSS for ABAKI_c09930	8	ABAKI_c09860	ABAKI_c09870	ABAKI_c09880	ABAKI_c09890	ABAKI_c09900	ABAKI_c09910	ABAKI_c09920	ABAKI_c09930
303	-	DOOR2, TSS		1	ABAKI_c09950
304	-	DOOR2, TSS		2	ABAKI_c09960	ABAKI_c09970
305	-	DOOR2, TSS		1	ABAKI_c09980
306	+	DOOR2, TSS		2	ABAKI_c09990	ABAKI_c10000
307	-	DOOR2, TSS		3	ABAKI_c10100	ABAKI_c10110	ABAKI_c10120
308	+	DOOR2, TSS		1	ABAKI_c10140
309	-	DOOR2, TSS		1	ABAKI_c10190
310	-	DOOR2, TSS		2	ABAKI_c10200	ABAKI_c10210
311	-	DOOR2, TSS		1	ABAKI_c10220
312	-	DOOR2, TSS		3	ABAKI_c10250	ABAKI_c10260	ABAKI_c10270
313	-	DOOR2, TSS		2	ABAKI_c10300	ABAKI_c10310
314	-	TSS	pTSS for ABAKI_c10310	1	ABAKI_c10310
315	-	DOOR2, TSS		5	ABAKI_c10320	ABAKI_c10330	ABAKI_c10340	ABAKI_c10350	ABAKI_c10360
316	-	TSS	pTSS for ABAKI_c10360	1	ABAKI_c10360
317	-	DOOR2, TSS		1	ABAKI_c10370
318	+	DOOR2, TSS		4	ABAKI_c10400	ABAKI_c10410	ABAKI_c10420	ABAKI_c10430
319	-	DOOR2, TSS		1	ABAKI_c10500
320	+	DOOR2, TSS		1	ABAKI_c10670
321	-	TSS	iTSS for ABAKI_c10800	3	ABAKI_c10780	ABAKI_c10790	ABAKI_c10800
322	-	TSS	pTSS for ABAKI_c10980	2	ABAKI_c10970	ABAKI_c10980
323	-	TSS	pTSS for ABAKI_c11010	1	ABAKI_c11010
324	-	DOOR2, TSS		1	ABAKI_c11180
325	+	DOOR2, TSS		2	ABAKI_c11310	ABAKI_c11320
326	-	DOOR2, TSS		1	ABAKI_c11330
327	+	DOOR2, TSS		1	ABAKI_c11400
328	+	DOOR2, TSS		2	ABAKI_c11410	ABAKI_c11420
329	+	DOOR2, TSS		1	ABAKI_c11460
330	+	DOOR2, TSS		2	ABAKI_c11600	ABAKI_c11610
331	-	DOOR2, TSS		2	ABAKI_c11620	ABAKI_c11630
332	+	DOOR2, TSS		1	ABAKI_c11670
333	-	DOOR2, TSS		1	ABAKI_c11680
334	+	DOOR2, TSS		2	ABAKI_c11690	ABAKI_c11700
335	-	TSS		1	ABAKI_c11710
336	-	DOOR2, TSS		2	ABAKI_c11790	ABAKI_c11800
337	+	DOOR2, TSS		1	ABAKI_c11840
338	-	DOOR2, TSS		1	ABAKI_c11850
339	+	DOOR2, TSS		2	ABAKI_c11860	ABAKI_c11870
340	-	DOOR2, TSS		3	ABAKI_c11900	ABAKI_c11910	ABAKI_c11920
341	-	TSS	iTSS for ABAKI_c12000	7	ABAKI_c11940	ABAKI_c11950	ABAKI_c11960	ABAKI_c11970	ABAKI_c11980	ABAKI_c11990	ABAKI_c12000
342	-	TSS	pTSS for ABAKI_c12010	2	ABAKI_c12000	ABAKI_c12010
343	-	DOOR2, TSS		2	ABAKI_c12030	ABAKI_c12040
344	-	DOOR2, TSS		1	ABAKI_c12060
345	-	DOOR2, TSS		15	ABAKI_c12070	ABAKI_c12080	ABAKI_c12090	ABAKI_c12100	ABAKI_c12110	ABAKI_c12120	ABAKI_c12130	ABAKI_c12140	ABAKI_c12150	ABAKI_c12160	ABAKI_c12170	ABAKI_c12180	ABAKI_c12190	ABAKI_c12200	ABAKI_c12210
346	-	TSS	pTSS for ABAKI_c12080	2	ABAKI_c12070	ABAKI_c12080
347	-	TSS	pTSS for ABAKI_c12340	1	ABAKI_c12340
348	-	DOOR2, TSS		1	ABAKI_c12350
349	+	DOOR2, TSS		2	ABAKI_c12710	ABAKI_c12720
350	-	TSS	pTSS for ABAKI_c12730	1	ABAKI_c12730
351	+	DOOR2, TSS		1	ABAKI_c12740
352	+	DOOR2, TSS		4	ABAKI_c12750	ABAKI_c12760	ABAKI_c12770	ABAKI_c12780
353	-	DOOR2, TSS		2	ABAKI_c12790	ABAKI_c12800
354	-	TSS	pTSS for ABAKI_c12800	1	ABAKI_c12800
355	-	DOOR2, TSS		3	ABAKI_c12820	ABAKI_c12830	ABAKI_c12840
356	+	DOOR2, TSS		4	ABAKI_c12850	ABAKI_c12860	ABAKI_c12870	ABAKI_c12880
357	-	DOOR2, TSS		4	ABAKI_c12890	ABAKI_c12900	ABAKI_c12910	ABAKI_c12920
358	-	DOOR2, TSS		5	ABAKI_c12930	ABAKI_c12940	ABAKI_c12950	ABAKI_c12960	ABAKI_c12970
359	-	DOOR2, TSS		2	ABAKI_c12980	ABAKI_c12990
360	-	DOOR2, TSS		1	ABAKI_c13000
361	-	DOOR2, TSS		1	ABAKI_c13010
362	-	DOOR2, TSS		1	ABAKI_c13020
363	-	TSS	pTSS for ABAKI_c13040	3	ABAKI_c13020	ABAKI_c13030	ABAKI_c13040
364	-	TSS	iTSS for ABAKI_c13050	3	ABAKI_c13020	ABAKI_c13030	ABAKI_c13040
365	-	TSS	pTSS for ABAKI_c13060	2	ABAKI_c13050	ABAKI_c13060
366	-	TSS	iTSS for ABAKI_c13060	2	ABAKI_c13050	ABAKI_c13060
367	-	DOOR2, TSS		3	ABAKI_c13070	ABAKI_c13080	ABAKI_c13090
368	-	DOOR2, TSS		3	ABAKI_c13100	ABAKI_c13110	ABAKI_c13120
369	-	DOOR2, TSS		4	ABAKI_c13130	ABAKI_c13140	ABAKI_c13150	ABAKI_c13160
370	-	DOOR2, TSS		3	ABAKI_c13170	ABAKI_c13180	ABAKI_c13190
371	-	DOOR2, TSS		1	ABAKI_c13210
372	-	TSS	pTSS for ABAKI_c13320	1	ABAKI_c13320
373	-	DOOR2, TSS		3	ABAKI_c13330	ABAKI_c13340	ABAKI_c13350
374	-	DOOR2, TSS		4	ABAKI_c13370	ABAKI_c13380	ABAKI_c13390	ABAKI_c13400
375	-	TSS	pTSS for ABAKI_c13380	2	ABAKI_c13370	ABAKI_c13380
376	-	TSS	pTSS for ABAKI_c13400	2	ABAKI_c13390	ABAKI_c13400
377	+	DOOR2, TSS		1	ABAKI_c13410
378	-	DOOR2, TSS		4	ABAKI_c13450	ABAKI_c13460	ABAKI_c13470	ABAKI_c13480
379	-	DOOR2, TSS		1	ABAKI_c13490
380	-	TSS	pTSS for ABAKI_c13540	1	ABAKI_c13540
381	-	DOOR2, TSS		3	ABAKI_c13550	ABAKI_c13560	ABAKI_c13570
382	-	TSS	pTSS for ABAKI_c13610	4	ABAKI_c13580	ABAKI_c13590	ABAKI_c13600	ABAKI_c13610
383	-	TSS	pTSS for ABAKI_c13640	3	ABAKI_c13620	ABAKI_c13630	ABAKI_c13640
384	-	TSS	pTSS for ABAKI_c13650	1	ABAKI_c13650
385	-	DOOR2, TSS		2	ABAKI_c13660	ABAKI_c13670
386	-	DOOR2, TSS		1	ABAKI_c13680
387	-	TSS	pTSS for ABAKI_c13710	1	ABAKI_c13710
388	-	TSS	iTSS for ABAKI_c13720	2	ABAKI_c13710	ABAKI_c13720
389	-	TSS	pTSS for ABAKI_c13800	10	ABAKI_c13710	ABAKI_c13720	ABAKI_c13730	ABAKI_c13740	ABAKI_c13750	ABAKI_c13760	ABAKI_c13770	ABAKI_c13780	ABAKI_c13790	ABAKI_c13800
390	-	TSS	pTSS for ABAKI_c13820	12	ABAKI_c13710	ABAKI_c13720	ABAKI_c13730	ABAKI_c13740	ABAKI_c13750	ABAKI_c13760	ABAKI_c13770	ABAKI_c13780	ABAKI_c13790	ABAKI_c13800	ABAKI_c13810	ABAKI_c13820
391	-	DOOR2, TSS		3	ABAKI_c13830	ABAKI_c13840	ABAKI_c13850
392	-	DOOR2, TSS		6	ABAKI_c13860	ABAKI_c13870	ABAKI_c13880	ABAKI_c13890	ABAKI_c13900	ABAKI_c13910
393	-	DOOR2, TSS		4	ABAKI_c13920	ABAKI_c13930	ABAKI_c13940	ABAKI_c13950
394	+	DOOR2, TSS		4	ABAKI_c13960	ABAKI_c13970	ABAKI_c13980	ABAKI_c13990
395	-	DOOR2, TSS		3	ABAKI_c14010	ABAKI_c14020	ABAKI_c14030
396	-	TSS	pTSS for ABAKI_c14020	1	ABAKI_c14020
397	-	TSS	pTSS for ABAKI_c14030	1	ABAKI_c14030
398	+	DOOR2, TSS		2	ABAKI_c14040	ABAKI_c14050
399	-	TSS	pTSS for ABAKI_c14090	2	ABAKI_c14080	ABAKI_c14090
400	+	DOOR2, TSS		3	ABAKI_c14110	ABAKI_c14120	ABAKI_c14130
401	-	DOOR2, TSS		3	ABAKI_c14140	ABAKI_c14150	ABAKI_c14160
402	-	TSS	pTSS for ABAKI_c14160	1	ABAKI_c14160
403	+	DOOR2, TSS		1	ABAKI_c14170
404	-	DOOR2, TSS		1	ABAKI_c14180
405	-	DOOR2, TSS		3	ABAKI_c14200	ABAKI_c14210	ABAKI_c14220
406	-	DOOR2, TSS		1	ABAKI_c14230
407	-	TSS	pTSS for ABAKI_c14250	3	ABAKI_c14230	ABAKI_c14240	ABAKI_c14250
408	-	TSS	pTSS for ABAKI_c14290	4	ABAKI_c14260	ABAKI_c14270	ABAKI_c14280	ABAKI_c14290
409	-	TSS	pTSS for ABAKI_c14300	5	ABAKI_c14260	ABAKI_c14270	ABAKI_c14280	ABAKI_c14290	ABAKI_c14300
410	-	DOOR2, TSS		2	ABAKI_c14330	ABAKI_c14340
411	+	DOOR2, TSS		1	ABAKI_c14350
412	-	DOOR2, TSS		1	ABAKI_c14360
413	-	DOOR2, TSS		1	ABAKI_c14370
414	-	DOOR2, TSS		2	ABAKI_c14380	ABAKI_c14390
415	-	TSS	pTSS for ABAKI_c14390	1	ABAKI_c14390
416	+	DOOR2, TSS		2	ABAKI_c14400	ABAKI_c14410
417	-	TSS	pTSS for ABAKI_c14440	3	ABAKI_c14420	ABAKI_c14430	ABAKI_c14440
418	-	TSS	pTSS for ABAKI_c14460	2	ABAKI_c14450	ABAKI_c14460
419	-	TSS	pTSS for ABAKI_c14470	3	ABAKI_c14450	ABAKI_c14460	ABAKI_c14470
420	-	TSS	pTSS for ABAKI_t00380	5	ABAKI_t00340	ABAKI_t00350	ABAKI_t00360	ABAKI_t00370	ABAKI_t00380
421	-	DOOR2, TSS		6	ABAKI_c14490	ABAKI_c14500	ABAKI_c14510	ABAKI_c14520	ABAKI_c14530	ABAKI_c14540
422	-	TSS	pTSS for ABAKI_c14520	1	ABAKI_c14520
423	-	TSS	pTSS for ABAKI_c14540	1	ABAKI_c14540
424	-	DOOR2, TSS		6	ABAKI_c14550	ABAKI_c14560	ABAKI_c14570	ABAKI_c14580	ABAKI_c14590	ABAKI_c14600
425	-	TSS	pTSS for ABAKI_c14580	3	ABAKI_c14560	ABAKI_c14570	ABAKI_c14580
426	-	TSS	pTSS for ABAKI_c14600	2	ABAKI_c14590	ABAKI_c14600
427	-	DOOR2, TSS		1	ABAKI_c14610
428	+	DOOR2, TSS		2	ABAKI_c14620	ABAKI_c14630
429	+	TSS	pTSS for ABAKI_c14630	3	ABAKI_c14630	ABAKI_c14640	ABAKI_c14650
430	+	DOOR2, TSS		1	ABAKI_c14660
431	-	DOOR2, TSS		2	ABAKI_c14670	ABAKI_c14680
432	-	TSS	pTSS for ABAKI_c14680	1	ABAKI_c14680
433	+	DOOR2, TSS		3	ABAKI_c14690	ABAKI_c14700	ABAKI_c14710
434	+	DOOR2, TSS		3	ABAKI_c14720	ABAKI_c14730	ABAKI_c14740
435	-	DOOR2, TSS		4	ABAKI_c14760	ABAKI_c14770	ABAKI_c14780	ABAKI_c14790
436	-	TSS	pTSS for ABAKI_c14790	1	ABAKI_c14790
437	-	DOOR2, TSS		4	ABAKI_c14800	ABAKI_c14810	ABAKI_c14820	ABAKI_c14830
438	-	DOOR2, TSS		2	ABAKI_c14940	ABAKI_c14950
439	-	DOOR2, TSS		2	ABAKI_c14960	ABAKI_c14970
440	-	TSS	pTSS for ABAKI_c15140	2	ABAKI_c15130	ABAKI_c15140
441	-	TSS	pTSS for ABAKI_c15160	2	ABAKI_c15150	ABAKI_c15160
442	-	DOOR2, TSS		5	ABAKI_c15180	ABAKI_c15190	ABAKI_c15200	ABAKI_c15210	ABAKI_c15220
443	-	DOOR2, TSS		3	ABAKI_c15260	ABAKI_c15270	ABAKI_c15280
444	-	TSS	pTSS for ABAKI_c15300	2	ABAKI_c15290	ABAKI_c15300
445	-	TSS	pTSS for ABAKI_c15330	3	ABAKI_c15310	ABAKI_c15320	ABAKI_c15330
446	-	TSS	pTSS for ABAKI_c15410	8	ABAKI_c15340	ABAKI_c15350	ABAKI_c15360	ABAKI_c15370	ABAKI_c15380	ABAKI_c15390	ABAKI_c15400	ABAKI_c15410
447	-	DOOR2, TSS		6	ABAKI_c15420	ABAKI_c15430	ABAKI_c15440	ABAKI_c15450	ABAKI_c15460	ABAKI_c15470
448	-	DOOR2, TSS		1	ABAKI_c15480
449	-	DOOR2, TSS		2	ABAKI_c15490	ABAKI_c15500
450	-	DOOR2, TSS		2	ABAKI_c15510	ABAKI_c15520
451	-	DOOR2, TSS		2	ABAKI_c15530	ABAKI_c15540
452	-	DOOR2, TSS		3	ABAKI_c15550	ABAKI_c15560	ABAKI_c15570
453	-	TSS	pTSS for ABAKI_c15660	9	ABAKI_c15580	ABAKI_c15590	ABAKI_c15600	ABAKI_c15610	ABAKI_c15620	ABAKI_c15630	ABAKI_c15640	ABAKI_c15650	ABAKI_c15660
454	-	TSS	pTSS for ABAKI_c15670	1	ABAKI_c15670
455	-	DOOR2, TSS		1	ABAKI_c15750
456	-	DOOR2, TSS		2	ABAKI_c15760	ABAKI_c15770
457	-	DOOR2, TSS		1	ABAKI_c15780
458	-	DOOR2, TSS		3	ABAKI_c15790	ABAKI_c15800	ABAKI_c15810
459	-	DOOR2, TSS		1	ABAKI_c15820
460	-	DOOR2, TSS		6	ABAKI_c15830	ABAKI_c15840	ABAKI_c15850	ABAKI_c15860	ABAKI_c15870	ABAKI_c15880
461	-	DOOR2, TSS		2	ABAKI_c15890	ABAKI_c15900
462	-	DOOR2, TSS		7	ABAKI_c15910	ABAKI_c15920	ABAKI_c15930	ABAKI_c15940	ABAKI_c15950	ABAKI_c15960	ABAKI_c15970
463	-	TSS	pTSS for ABAKI_c15940	4	ABAKI_c15910	ABAKI_c15920	ABAKI_c15930	ABAKI_c15940
464	-	DOOR2, TSS		1	ABAKI_c15980
465	+	DOOR2, TSS		5	ABAKI_c15990	ABAKI_c16000	ABAKI_c16010	ABAKI_c16020	ABAKI_c16030
466	+	TSS	pTSS for ABAKI_c16030	2	ABAKI_c16040	ABAKI_c16050
467	-	TSS	pTSS for ABAKI_c16050	2	ABAKI_c16060	ABAKI_c16070
468	-	TSS	pTSS for ABAKI_c16070	2	ABAKI_c16060	ABAKI_c16070
469	-	DOOR2, TSS		3	ABAKI_c16080	ABAKI_c16090	ABAKI_c16100
470	+	DOOR2, TSS		6	ABAKI_c16110	ABAKI_c16120	ABAKI_c16130	ABAKI_c16140	ABAKI_c16150	ABAKI_c16160
471	+	DOOR2, TSS		2	ABAKI_c16170	ABAKI_c16180
472	-	DOOR2, TSS		2	ABAKI_c16190	ABAKI_c16200
473	-	DOOR2, TSS		1	ABAKI_c16250
474	-	TSS	pTSS for ABAKI_c16280	3	ABAKI_c16260	ABAKI_c16270	ABAKI_c16280
475	+	DOOR2, TSS		1	ABAKI_c16310
476	-	DOOR2, TSS		1	ABAKI_c16410
477	-	DOOR2, TSS		1	ABAKI_c16420
478	+	DOOR2, TSS		4	ABAKI_c16430	ABAKI_c16440	ABAKI_c16450	ABAKI_c16460
479	-	DOOR2, TSS		2	ABAKI_c16490	ABAKI_c16500
480	-	TSS	pTSS for ABAKI_c16530	1	ABAKI_c16530
481	+	DOOR2, TSS		2	ABAKI_c16660	ABAKI_c16670
482	-	DOOR2, TSS		1	ABAKI_c16680
483	-	DOOR2, TSS		2	ABAKI_c16760	ABAKI_c16770
484	+	DOOR2, TSS		3	ABAKI_c16780	ABAKI_c16790	ABAKI_c16800
485	-	DOOR2, TSS		7	ABAKI_c16810	ABAKI_c16820	ABAKI_c16830	ABAKI_c16840	ABAKI_c16850	ABAKI_c16860	ABAKI_c16870
486	+	DOOR2, TSS		1	ABAKI_c16880
487	-	DOOR2, TSS		1	ABAKI_c16890
488	-	DOOR2, TSS		2	ABAKI_c16900	ABAKI_c16910
489	-	TSS	pTSS for ABAKI_c16960	5	ABAKI_c16920	ABAKI_c16930	ABAKI_c16940	ABAKI_c16950	ABAKI_c16960
490	-	DOOR2, TSS		1	ABAKI_c16970
491	-	TSS	pTSS for ABAKI_c17000	3	ABAKI_c16980	ABAKI_c16990	ABAKI_c17000
492	-	TSS	pTSS for ABAKI_c17040	4	ABAKI_c17010	ABAKI_c17020	ABAKI_c17030	ABAKI_c17040
493	-	DOOR2, TSS		1	ABAKI_c17050
494	-	TSS	pTSS for ABAKI_c17060	1	ABAKI_c17060
495	+	DOOR2, TSS		1	ABAKI_c17080
496	-	DOOR2, TSS		2	ABAKI_c17090	ABAKI_c17100
497	+	DOOR2, TSS		6	ABAKI_c17130	ABAKI_c17140	ABAKI_c17150	ABAKI_c17160	ABAKI_c17170	ABAKI_c17180
498	-	DOOR2, TSS		1	ABAKI_c17190
499	-	TSS	pTSS for ABAKI_c17210	2	ABAKI_c17200	ABAKI_c17210
500	+	DOOR2, TSS		1	ABAKI_c17220
501	-	DOOR2, TSS		1	ABAKI_c17240
502	-	TSS	pTSS for ABAKI_c17260	3	ABAKI_c17240	ABAKI_c17250	ABAKI_c17260
503	-	TSS	pTSS for ABAKI_c17280	2	ABAKI_c17270	ABAKI_c17280
504	-	TSS	pTSS for ABAKI_c17290	1	ABAKI_c17290
505	-	TSS	pTSS for ABAKI_c17310	3	ABAKI_c17290	ABAKI_c17300	ABAKI_c17310
506	-	DOOR2, TSS		1	ABAKI_c17380
507	-	DOOR2, TSS		6	ABAKI_c17420	ABAKI_c17430	ABAKI_c17440	ABAKI_c17450	ABAKI_c17460	ABAKI_c17470
508	-	TSS	pTSS for ABAKI_c17500	1	ABAKI_c17500
509	-	TSS	pTSS for ABAKI_c17510	1	ABAKI_c17510
510	-	DOOR2, TSS		11	ABAKI_c17520	ABAKI_c17530	ABAKI_c17540	ABAKI_c17550	ABAKI_c17560	ABAKI_c17570	ABAKI_c17580	ABAKI_c17590	ABAKI_c17600	ABAKI_c17610	ABAKI_c17620
511	-	TSS	pTSS for ABAKI_c17540	3	ABAKI_c17520	ABAKI_c17530	ABAKI_c17540
512	-	TSS	pTSS for ABAKI_c17560	2	ABAKI_c17550	ABAKI_c17560
513	-	TSS	pTSS for ABAKI_c17620	6	ABAKI_c17570	ABAKI_c17580	ABAKI_c17590	ABAKI_c17600	ABAKI_c17610	ABAKI_c17620
514	-	DOOR2, TSS		2	ABAKI_c17630	ABAKI_c17640
515	+	DOOR2, TSS		1	ABAKI_c17650
516	-	DOOR2, TSS		3	ABAKI_c17660	ABAKI_c17670	ABAKI_c17680
517	-	DOOR2, TSS		2	ABAKI_c17710	ABAKI_c17720
518	-	DOOR2, TSS		1	ABAKI_c17790
519	-	DOOR2, TSS		3	ABAKI_c17810	ABAKI_c17820	ABAKI_c17830
520	-	DOOR2, TSS		5	ABAKI_c17870	ABAKI_c17880	ABAKI_c17890	ABAKI_c17900	ABAKI_c17910
521	+	DOOR2, TSS		1	ABAKI_c17920
522	+	DOOR2, TSS		1	ABAKI_c17930
523	-	DOOR2, TSS		3	ABAKI_c17950	ABAKI_c17960	ABAKI_c17970
524	-	TSS	pTSS for ABAKI_c17960	2	ABAKI_c17950	ABAKI_c17960
525	-	TSS	pTSS for ABAKI_c17970	1	ABAKI_c17970
526	-	DOOR2, TSS		2	ABAKI_c17980	ABAKI_c17990
527	+	DOOR2, TSS		1	ABAKI_c18000
528	-	DOOR2, TSS		10	ABAKI_c18010	ABAKI_c18020	ABAKI_c18030	ABAKI_c18040	ABAKI_c18050	ABAKI_c18060	ABAKI_c18070	ABAKI_c18080	ABAKI_c18090	ABAKI_c18100
529	-	TSS	pTSS for ABAKI_c18190	8	ABAKI_c18120	ABAKI_c18130	ABAKI_c18140	ABAKI_c18150	ABAKI_c18160	ABAKI_c18170	ABAKI_c18180	ABAKI_c18190
530	+	DOOR2, TSS		1	ABAKI_c18200
531	-	DOOR2, TSS		1	ABAKI_c18210
532	-	DOOR2, TSS		1	ABAKI_c18220
533	-	DOOR2, TSS		1	ABAKI_c18230
534	-	DOOR2, TSS		1	ABAKI_c18240
535	-	DOOR2, TSS		1	ABAKI_c18290
536	-	TSS	pTSS for ABAKI_c18320	3	ABAKI_c18300	ABAKI_c18310	ABAKI_c18320
537	-	TSS	pTSS for ABAKI_c18360	4	ABAKI_c18330	ABAKI_c18340	ABAKI_c18350	ABAKI_c18360
538	-	TSS	pTSS for ABAKI_c18440	12	ABAKI_c18330	ABAKI_c18340	ABAKI_c18350	ABAKI_c18360	ABAKI_c18370	ABAKI_c18380	ABAKI_c18390	ABAKI_c18400	ABAKI_c18410	ABAKI_c18420	ABAKI_c18430	ABAKI_c18440
539	-	DOOR2, TSS		1	ABAKI_c18480
540	-	DOOR2, TSS		1	ABAKI_c18490
541	-	DOOR2, TSS		7	ABAKI_c18500	ABAKI_c18510	ABAKI_c18520	ABAKI_c18530	ABAKI_c18540	ABAKI_c18550	ABAKI_c18560
542	-	DOOR2, TSS		4	ABAKI_c18570	ABAKI_c18580	ABAKI_c18590	ABAKI_c18600
543	-	TSS	pTSS for ABAKI_c18600	1	ABAKI_c18600
544	-	DOOR2, TSS		3	ABAKI_c18610	ABAKI_c18620	ABAKI_c18630
545	-	TSS	pTSS for ABAKI_c18650	2	ABAKI_c18640	ABAKI_c18650
546	-	TSS	pTSS for ABAKI_c18660	1	ABAKI_c18660
547	-	DOOR2, TSS		7	ABAKI_c18670	ABAKI_c18680	ABAKI_c18690	ABAKI_c18700	ABAKI_c18710	ABAKI_c18720	ABAKI_c18730
548	-	DOOR2, TSS		2	ABAKI_c18740	ABAKI_c18750
549	+	DOOR2, TSS		3	ABAKI_c18760	ABAKI_c18770	ABAKI_c18780
550	-	DOOR2, TSS		8	ABAKI_c18790	ABAKI_c18800	ABAKI_c18810	ABAKI_c18820	ABAKI_c18830	ABAKI_c18840	ABAKI_c18850	ABAKI_c18860
551	-	DOOR2, TSS		5	ABAKI_c18900	ABAKI_c18910	ABAKI_c18920	ABAKI_c18930	ABAKI_c18940
552	+	DOOR2, TSS		1	ABAKI_c18950
553	-	DOOR2, TSS		7	ABAKI_c18980	ABAKI_c18990	ABAKI_c19000	ABAKI_c19010	ABAKI_c19020	ABAKI_c19030	ABAKI_c19040
554	-	DOOR2, TSS		1	ABAKI_c19050
555	-	DOOR2, TSS		3	ABAKI_c19070	ABAKI_c19080	ABAKI_c19090
556	-	TSS	pTSS for ABAKI_c19110	2	ABAKI_c19100	ABAKI_c19110
557	-	TSS	pTSS for ABAKI_c19130	4	ABAKI_c19100	ABAKI_c19110	ABAKI_c19120	ABAKI_c19130
558	-	DOOR2, TSS		1	ABAKI_c19150
559	-	DOOR2, TSS		1	ABAKI_c19160
560	+	DOOR2, TSS		2	ABAKI_c19170	ABAKI_c19180
561	-	DOOR2, TSS		1	ABAKI_c19230
562	+	DOOR2, TSS		4	ABAKI_c19240	ABAKI_c19250	ABAKI_c19260	ABAKI_c19270
563	+	TSS	pTSS for ABAKI_c19270	1	ABAKI_c19270
564	-	DOOR2, TSS		3	ABAKI_c19280	ABAKI_c19290	ABAKI_c19300
565	+	DOOR2, TSS		5	ABAKI_c19310	ABAKI_c19320	ABAKI_c19330	ABAKI_c19340	ABAKI_c19350
566	-	TSS	pTSS for ABAKI_c19370	2	ABAKI_c19360	ABAKI_c19370
567	-	TSS	pTSS for ABAKI_c19380	3	ABAKI_c19360	ABAKI_c19370	ABAKI_c19380
568	-	DOOR2, TSS		1	ABAKI_c19390
569	-	TSS	pTSS for ABAKI_c19440	3	ABAKI_c19420	ABAKI_c19430	ABAKI_c19440
570	-	TSS	pTSS for ABAKI_c19460	2	ABAKI_c19450	ABAKI_c19460
571	-	TSS	pTSS for ABAKI_c19490	3	ABAKI_c19470	ABAKI_c19480	ABAKI_c19490
572	-	TSS	pTSS for ABAKI_c19550	4	ABAKI_c19520	ABAKI_c19530	ABAKI_c19540	ABAKI_c19550
573	-	TSS	pTSS for ABAKI_c19560	1	ABAKI_c19560
574	+	DOOR2, TSS		1	ABAKI_c19570
575	-	DOOR2, TSS		1	ABAKI_c19580
576	+	DOOR2, TSS		1	ABAKI_c19590
577	-	DOOR2, TSS		7	ABAKI_c19600	ABAKI_c19610	ABAKI_c19620	ABAKI_c19630	ABAKI_c19640	ABAKI_c19650	ABAKI_c19660
578	-	TSS	pTSS for ABAKI_c19610	2	ABAKI_c19600	ABAKI_c19610
579	-	TSS	pTSS for ABAKI_c19660	5	ABAKI_c19620	ABAKI_c19630	ABAKI_c19640	ABAKI_c19650	ABAKI_c19660
580	-	DOOR2, TSS		1	ABAKI_c19680
581	+	DOOR2, TSS		7	ABAKI_c19690	ABAKI_c19700	ABAKI_c19710	ABAKI_c19720	ABAKI_c19730	ABAKI_c19740	ABAKI_c19750
582	+	DOOR2, TSS		10	ABAKI_c19760	ABAKI_c19770	ABAKI_c19780	ABAKI_c19790	ABAKI_c19800	ABAKI_c19810	ABAKI_c19820	ABAKI_c19830	ABAKI_c19840	ABAKI_c19850
583	+	TSS	iTSS for ABAKI_c19780	8	ABAKI_c19780	ABAKI_c19790	ABAKI_c19800	ABAKI_c19810	ABAKI_c19820	ABAKI_c19830	ABAKI_c19840	ABAKI_c19850
584	+	TSS	iTSS for ABAKI_c19800	6	ABAKI_c19800	ABAKI_c19810	ABAKI_c19820	ABAKI_c19830	ABAKI_c19840	ABAKI_c19850
585	+	TSS	pTSS for ABAKI_c19830	1	ABAKI_c19830
586	+	TSS	pTSS for ABAKI_c19840	2	ABAKI_c19840	ABAKI_c19850
587	+	DOOR2, TSS		7	ABAKI_c19860	ABAKI_c19870	ABAKI_c19880	ABAKI_c19890	ABAKI_c19900	ABAKI_c19910	ABAKI_c19920
588	+	TSS	pTSS for ABAKI_c19880	5	ABAKI_c19880	ABAKI_c19890	ABAKI_c19900	ABAKI_c19910	ABAKI_c19920
589	+	TSS	pTSS for ABAKI_c19920	1	ABAKI_c19920
590	-	DOOR2, TSS		1	ABAKI_c19930
591	+	DOOR2, TSS		5	ABAKI_c19940	ABAKI_c19950	ABAKI_c19960	ABAKI_c19970	ABAKI_c19980
592	+	TSS	pTSS for ABAKI_c19980	1	ABAKI_c19980
593	+	TSS	pTSS for ABAKI_c19990	1	ABAKI_c19990
594	+	TSS	pTSS for ABAKI_c20010	2	ABAKI_c20000	ABAKI_c20010
595	+	DOOR2, TSS		2	ABAKI_c20020	ABAKI_c20030
596	+	DOOR2, TSS		2	ABAKI_c20050	ABAKI_c20060
597	+	TSS	pTSS for ABAKI_c20060	1	ABAKI_c20060
598	+	DOOR2, TSS		1	ABAKI_c20070
599	-	DOOR2, TSS		1	ABAKI_c20130
600	-	DOOR2, TSS		2	ABAKI_c20180	ABAKI_c20190
601	+	DOOR2, TSS		1	ABAKI_c20230
602	+	TSS	pTSS for ABAKI_c20260	1	ABAKI_c20260
603	+	TSS	pTSS for ABAKI_c20270	3	ABAKI_c20270	ABAKI_c20280	ABAKI_c20290
604	+	DOOR2, TSS		1	ABAKI_c20310
605	+	DOOR2, TSS		1	ABAKI_c20320
606	-	DOOR2, TSS		1	ABAKI_c20330
607	+	DOOR2, TSS		1	ABAKI_c20340
608	-	DOOR2, TSS		2	ABAKI_c20350	ABAKI_c20360
609	+	DOOR2, TSS		4	ABAKI_c20370	ABAKI_c20380	ABAKI_c20390	ABAKI_c20400
610	+	TSS	pTSS for ABAKI_c20410	7	ABAKI_c20410	ABAKI_c20420	ABAKI_c20430	ABAKI_c20440	ABAKI_c20450	ABAKI_c20460	ABAKI_c20470
611	+	DOOR2, TSS		3	ABAKI_c20510	ABAKI_c20520	ABAKI_c20530
612	+	DOOR2, TSS		1	ABAKI_c20550
613	+	DOOR2, TSS		17	ABAKI_c20560	ABAKI_c20570	ABAKI_c20580	ABAKI_c20590	ABAKI_c20600	ABAKI_c20610	ABAKI_c20620	ABAKI_c20630	ABAKI_c20640	ABAKI_c20650	ABAKI_c20660	ABAKI_c20670	ABAKI_c20680	ABAKI_c20690	ABAKI_c20700	ABAKI_c20710	ABAKI_c20720
614	+	DOOR2, TSS		5	ABAKI_c20730	ABAKI_c20740	ABAKI_c20750	ABAKI_c20760	ABAKI_c20770
615	+	TSS	pTSS for ABAKI_c20770	1	ABAKI_c20770
616	+	DOOR2, TSS		4	ABAKI_c20780	ABAKI_c20790	ABAKI_c20800	ABAKI_c20810
617	+	DOOR2, TSS		5	ABAKI_c20850	ABAKI_c20860	ABAKI_c20870	ABAKI_c20880	ABAKI_c20890
618	+	DOOR2, TSS		1	ABAKI_c20900
619	+	DOOR2, TSS		18	ABAKI_c20910	ABAKI_c20920	ABAKI_c20930	ABAKI_c20940	ABAKI_c20950	ABAKI_c20960	ABAKI_c20970	ABAKI_c20980	ABAKI_c20990	ABAKI_c21000	ABAKI_c21010	ABAKI_c21020	ABAKI_c21030	ABAKI_c21040	ABAKI_c21050	ABAKI_c21060	ABAKI_c21070	ABAKI_c21080
620	+	TSS	pTSS for ABAKI_c20920	17	ABAKI_c20920	ABAKI_c20930	ABAKI_c20940	ABAKI_c20950	ABAKI_c20960	ABAKI_c20970	ABAKI_c20980	ABAKI_c20990	ABAKI_c21000	ABAKI_c21010	ABAKI_c21020	ABAKI_c21030	ABAKI_c21040	ABAKI_c21050	ABAKI_c21060	ABAKI_c21070	ABAKI_c21080
621	+	TSS	iTSS for ABAKI_c20930	15	ABAKI_c20940	ABAKI_c20950	ABAKI_c20960	ABAKI_c20970	ABAKI_c20980	ABAKI_c20990	ABAKI_c21000	ABAKI_c21010	ABAKI_c21020	ABAKI_c21030	ABAKI_c21040	ABAKI_c21050	ABAKI_c21060	ABAKI_c21070	ABAKI_c21080
622	+	DOOR2, TSS		5	ABAKI_c21150	ABAKI_c21160	ABAKI_c21170	ABAKI_c21180	ABAKI_c21190
623	+	TSS	pTSS for ABAKI_c21170	1	ABAKI_c21170
624	+	DOOR2, TSS		8	ABAKI_c21200	ABAKI_c21210	ABAKI_c21220	ABAKI_c21230	ABAKI_c21240	ABAKI_c21250	ABAKI_c21260	ABAKI_c21270
625	-	DOOR2, TSS		2	ABAKI_c21280	ABAKI_c21290
626	+	DOOR2, TSS		3	ABAKI_c21300	ABAKI_c21310	ABAKI_c21320
627	+	TSS	pTSS for ABAKI_c21340	1	ABAKI_c21340
628	-	DOOR2, TSS		2	ABAKI_c21360	ABAKI_c21370
629	+	DOOR2, TSS		9	ABAKI_c21380	ABAKI_c21390	ABAKI_c21400	ABAKI_c21410	ABAKI_c21420	ABAKI_c21430	ABAKI_c21440	ABAKI_c21450	ABAKI_c21460
630	+	DOOR2, TSS		1	ABAKI_c21470
631	+	DOOR2, TSS		1	ABAKI_c21490
632	+	DOOR2, TSS		4	ABAKI_c21530	ABAKI_c21540	ABAKI_c21550	ABAKI_c21560
633	+	TSS	pTSS for ABAKI_c21570	7	ABAKI_c21570	ABAKI_c21580	ABAKI_c21590	ABAKI_c21600	ABAKI_c21610	ABAKI_c21620	ABAKI_c21630
634	+	DOOR2, TSS		1	ABAKI_c21720
635	+	DOOR2, TSS		6	ABAKI_c21730	ABAKI_c21740	ABAKI_c21750	ABAKI_c21760	ABAKI_c21770	ABAKI_c21780
636	+	TSS	pTSS for ABAKI_c21770	2	ABAKI_c21770	ABAKI_c21780
637	+	TSS	pTSS for ABAKI_c21800	6	ABAKI_c21800	ABAKI_c21810	ABAKI_c21820	ABAKI_c21830	ABAKI_c21840	ABAKI_c21850
638	+	TSS	pTSS for ABAKI_c21850	1	ABAKI_c21850
639	-	DOOR2, TSS		2	ABAKI_c21860	ABAKI_c21870
640	+	TSS	pTSS for ABAKI_c21900	1	ABAKI_c21900
641	+	DOOR2, TSS		6	ABAKI_c21920	ABAKI_c21930	ABAKI_c21940	ABAKI_c21950	ABAKI_c21960	ABAKI_c21970
642	+	DOOR2, TSS		2	ABAKI_c21980	ABAKI_c21990
643	+	TSS	pTSS for ABAKI_c21990	1	ABAKI_c21990
644	-	DOOR2, TSS		1	ABAKI_c22000
645	+	TSS	pTSS for ABAKI_c22050	2	ABAKI_c22050	ABAKI_c22060
646	+	DOOR2, TSS		2	ABAKI_c22070	ABAKI_c22080
647	-	TSS	pTSS for ABAKI_c22120	4	ABAKI_c22090	ABAKI_c22100	ABAKI_c22110	ABAKI_c22120
648	+	DOOR2, TSS		1	ABAKI_c22170
649	+	DOOR2, TSS		2	ABAKI_c22190	ABAKI_c22200
650	-	DOOR2, TSS		2	ABAKI_c22210	ABAKI_c22220
651	+	DOOR2, TSS		1	ABAKI_c22230
652	+	TSS	pTSS for ABAKI_c22260	1	ABAKI_c22260
653	+	DOOR2, TSS		1	ABAKI_c22290
654	+	DOOR2, TSS		3	ABAKI_c22300	ABAKI_t00460	ABAKI_t00470
655	+	TSS	pTSS for ABAKI_t00460	1	ABAKI_t00460
656	+	DOOR2, TSS		4	ABAKI_c22330	ABAKI_c22340	ABAKI_c22350	ABAKI_c22360
657	+	DOOR2, TSS		4	ABAKI_c22400	ABAKI_c22410	ABAKI_c22420	ABAKI_c22430
658	+	DOOR2, TSS		2	ABAKI_c22440	ABAKI_c22450
659	-	DOOR2, TSS		1	ABAKI_c22470
660	-	TSS	pTSS for ABAKI_c22490	2	ABAKI_c22480	ABAKI_c22490
661	+	DOOR2, TSS		4	ABAKI_c22500	ABAKI_c22510	ABAKI_c22520	ABAKI_c22530
662	+	DOOR2, TSS		2	ABAKI_c22560	ABAKI_c22570
663	+	TSS	pTSS for ABAKI_c22610	1	ABAKI_c22610
664	-	DOOR2, TSS		1	ABAKI_c22670
665	+	DOOR2, TSS		3	ABAKI_c22700	ABAKI_c22710	ABAKI_c22720
666	+	TSS	pTSS for ABAKI_c22730	7	ABAKI_c22730	ABAKI_c22740	ABAKI_c22750	ABAKI_c22760	ABAKI_c22770	ABAKI_c22780	ABAKI_c22790
667	+	TSS	pTSS for ABAKI_c22870	1	ABAKI_c22870
668	+	DOOR2, TSS		2	ABAKI_c22900	ABAKI_c22910
669	+	DOOR2, TSS		1	ABAKI_c22940
670	+	DOOR2, TSS		3	ABAKI_c22950	ABAKI_c22960	ABAKI_c22970
671	+	DOOR2, TSS		1	ABAKI_c22990
672	-	DOOR2, TSS		2	ABAKI_c23000	ABAKI_c23010
673	-	DOOR2, TSS		3	ABAKI_c23090	ABAKI_c23100	ABAKI_c23110
674	-	DOOR2, TSS		2	ABAKI_c23120	ABAKI_c23130
675	+	DOOR2, TSS		1	ABAKI_c23140
676	+	DOOR2, TSS		3	ABAKI_c23160	ABAKI_c23170	ABAKI_c23180
677	+	DOOR2, TSS		1	ABAKI_c23190
678	+	DOOR2, TSS		1	ABAKI_c23200
679	-	DOOR2, TSS		3	ABAKI_c23210	ABAKI_c23220	ABAKI_c23230
680	-	TSS	iTSS for ABAKI_c23230	2	ABAKI_c23210	ABAKI_c23220
681	+	TSS	pTSS for ABAKI_c23260	1	ABAKI_c23260
682	-	DOOR2, TSS		2	ABAKI_c23270	ABAKI_c23280
683	-	DOOR2, TSS		2	ABAKI_c23310	ABAKI_c23320
684	+	DOOR2, TSS		2	ABAKI_c23330	ABAKI_c23340
685	+	DOOR2, TSS		1	ABAKI_c23360
686	+	DOOR2, TSS		1	ABAKI_c23370
687	+	DOOR2, TSS		1	ABAKI_c23380
688	+	TSS	iTSS for ABAKI_c23400	1	ABAKI_c23400
689	-	DOOR2, TSS		2	ABAKI_c23410	ABAKI_c23420
690	+	DOOR2, TSS		1	ABAKI_c23430
691	+	DOOR2, TSS		2	ABAKI_c23440	ABAKI_c23450
692	+	TSS	pTSS for ABAKI_c23490	1	ABAKI_c23490
693	+	TSS	iTSS for ABAKI_c23490	6	ABAKI_c23500	ABAKI_c23510	ABAKI_c23520	ABAKI_c23530	ABAKI_c23540	ABAKI_c23550
694	+	TSS	pTSS for ABAKI_c23560	2	ABAKI_c23560	ABAKI_c23570
695	+	DOOR2, TSS		3	ABAKI_c23580	ABAKI_c23590	ABAKI_c23600
696	+	DOOR2, TSS		3	ABAKI_c23760	ABAKI_c23770	ABAKI_c23780
697	-	DOOR2, TSS		2	ABAKI_c23790	ABAKI_c23800
698	+	DOOR2, TSS		1	ABAKI_c23810
699	-	DOOR2, TSS		1	ABAKI_c23820
700	+	DOOR2, TSS		3	ABAKI_c23830	ABAKI_c23840	ABAKI_t00480
701	+	DOOR2, TSS		1	ABAKI_c23850
702	+	DOOR2, TSS		1	ABAKI_c23870
703	+	DOOR2, TSS		1	ABAKI_c23880
704	+	DOOR2, TSS		1	ABAKI_c23920
705	+	DOOR2, TSS		1	ABAKI_c23960
706	+	DOOR2, TSS		4	ABAKI_c23990	ABAKI_c24000	ABAKI_c24010	ABAKI_c24020
707	+	TSS	pTSS for ABAKI_c24020	1	ABAKI_c24020
708	-	DOOR2, TSS		1	ABAKI_c24030
709	-	TSS	pTSS for ABAKI_c24040	2	ABAKI_c24030	ABAKI_c24040
710	+	DOOR2, TSS		1	ABAKI_c24050
711	-	TSS	pTSS for ABAKI_c24080	2	ABAKI_c24070	ABAKI_c24080
712	-	DOOR2, TSS		2	ABAKI_c24100	ABAKI_c24110
713	+	DOOR2, TSS		1	ABAKI_c24120
714	+	DOOR2, TSS		1	ABAKI_c24130
715	+	TSS	pTSS for ABAKI_c24140	1	ABAKI_c24140
716	+	TSS	pTSS for ABAKI_c24150	2	ABAKI_c24150	ABAKI_c24160
717	-	DOOR2, TSS		7	ABAKI_c24200	ABAKI_c24210	ABAKI_c24220	ABAKI_c24230	ABAKI_c24240	ABAKI_c24250	ABAKI_c24260
718	+	DOOR2, TSS		3	ABAKI_c24270	ABAKI_c24280	ABAKI_c24290
719	+	TSS	pTSS for ABAKI_c24280	2	ABAKI_c24280	ABAKI_c24290
720	-	DOOR2, TSS		1	ABAKI_c24300
721	-	DOOR2, TSS		2	ABAKI_c24360	ABAKI_c24370
722	+	DOOR2, TSS		1	ABAKI_c24380
723	+	TSS	pTSS for ABAKI_c24390	1	ABAKI_c24390
724	+	TSS	pTSS for ABAKI_c24400	2	ABAKI_c24400	ABAKI_c24410
725	+	TSS	pTSS for ABAKI_c24430	2	ABAKI_c24430	ABAKI_c24440
726	+	TSS	pTSS for ABAKI_c24460	3	ABAKI_c24460	ABAKI_c24470	ABAKI_c24480
727	+	DOOR2, TSS		7	ABAKI_c24490	ABAKI_c24500	ABAKI_c24510	ABAKI_c24520	ABAKI_c24530	ABAKI_c24540	ABAKI_c24550
728	+	DOOR2, TSS		1	ABAKI_c24560
729	-	DOOR2, TSS		1	ABAKI_c24570
730	-	DOOR2, TSS		1	ABAKI_c24590
731	+	DOOR2, TSS		1	ABAKI_c24780
732	+	DOOR2, TSS		6	ABAKI_c24790	ABAKI_c24800	ABAKI_c24810	ABAKI_c24820	ABAKI_c24830	ABAKI_c24840
733	+	TSS	pTSS for ABAKI_c24820	3	ABAKI_c24820	ABAKI_c24830	ABAKI_c24840
734	+	TSS	pTSS for ABAKI_c24840	1	ABAKI_c24840
735	+	DOOR2, TSS		1	ABAKI_c24850
736	+	TSS	pTSS for ABAKI_c24860	3	ABAKI_c24860	ABAKI_c24870	ABAKI_c24880
737	+	TSS	pTSS for ABAKI_c24920	2	ABAKI_c24920	ABAKI_c24930
738	-	DOOR2, TSS		1	ABAKI_c24940
739	+	DOOR2, TSS		2	ABAKI_c24980	ABAKI_c24990
740	+	DOOR2, TSS		1	ABAKI_c25020
741	+	DOOR2, TSS		1	ABAKI_c25030
742	+	TSS	pTSS for ABAKI_c25040	1	ABAKI_c25040
743	-	DOOR2, TSS		3	ABAKI_c25070	ABAKI_c25080	ABAKI_c25090
744	+	DOOR2, TSS		2	ABAKI_c25100	ABAKI_c25110
745	-	DOOR2, TSS		1	ABAKI_c25120
746	+	DOOR2, TSS		7	ABAKI_c25130	ABAKI_c25140	ABAKI_c25150	ABAKI_c25160	ABAKI_c25170	ABAKI_c25180	ABAKI_c25190
747	+	TSS	pTSS for ABAKI_c25140	6	ABAKI_c25140	ABAKI_c25150	ABAKI_c25160	ABAKI_c25170	ABAKI_c25180	ABAKI_c25190
748	+	DOOR2, TSS		1	ABAKI_c25210
749	+	DOOR2, TSS		22	ABAKI_c25220	ABAKI_c25230	ABAKI_c25240	ABAKI_c25250	ABAKI_c25260	ABAKI_c25270	ABAKI_c25280	ABAKI_c25290	ABAKI_c25300	ABAKI_c25310	ABAKI_c25320	ABAKI_c25330	ABAKI_c25340	ABAKI_c25350	ABAKI_c25360	ABAKI_c25370	ABAKI_c25380	ABAKI_c25390	ABAKI_c25400	ABAKI_c25410	ABAKI_c25420	ABAKI_c25430
750	+	TSS	pTSS for ABAKI_c25240	22	ABAKI_c25240	ABAKI_c25250	ABAKI_c25260	ABAKI_c25270	ABAKI_c25280	ABAKI_c25290	ABAKI_c25300	ABAKI_c25310	ABAKI_c25320	ABAKI_c25330	ABAKI_c25340	ABAKI_c25350	ABAKI_c25360	ABAKI_c25370	ABAKI_c25380	ABAKI_c25390	ABAKI_c25400	ABAKI_c25410	ABAKI_c25420	ABAKI_c25430	ABAKI_c25440	ABAKI_c25450
751	+	TSS	pTSS for ABAKI_c25270	22	ABAKI_c25270	ABAKI_c25280	ABAKI_c25290	ABAKI_c25300	ABAKI_c25310	ABAKI_c25320	ABAKI_c25330	ABAKI_c25340	ABAKI_c25350	ABAKI_c25360	ABAKI_c25370	ABAKI_c25380	ABAKI_c25390	ABAKI_c25400	ABAKI_c25410	ABAKI_c25420	ABAKI_c25430	ABAKI_c25440	ABAKI_c25450	ABAKI_c25460	ABAKI_c25470	ABAKI_c25480
752	+	DOOR2, TSS		2	ABAKI_c25630	ABAKI_c25640
753	-	DOOR2, TSS		1	ABAKI_c25650
754	+	DOOR2, TSS		5	ABAKI_c25660	ABAKI_c25670	ABAKI_c25680	ABAKI_c25690	ABAKI_c25700
755	+	TSS	pTSS for ABAKI_c25680	3	ABAKI_c25680	ABAKI_c25690	ABAKI_c25700
756	+	DOOR2, TSS		3	ABAKI_c25710	ABAKI_c25720	ABAKI_c25730
757	+	DOOR2, TSS		1	ABAKI_c25750
758	+	DOOR2, TSS		2	ABAKI_c25760	ABAKI_c25770
759	+	TSS	pTSS for ABAKI_c25770	5	ABAKI_c25770	ABAKI_c25780	ABAKI_c25790	ABAKI_c25800	ABAKI_c25810
760	+	DOOR2, TSS		1	ABAKI_c25820
761	-	DOOR2, TSS		1	ABAKI_c25830
762	+	DOOR2, TSS		1	ABAKI_c25840
763	-	DOOR2, TSS		1	ABAKI_c25850
764	+	DOOR2, TSS		12	ABAKI_c25860	ABAKI_c25870	ABAKI_c25880	ABAKI_c25890	ABAKI_c25900	ABAKI_c25910	ABAKI_c25920	ABAKI_c25930	ABAKI_c25940	ABAKI_c25950	ABAKI_c25960	ABAKI_c25970
765	+	TSS	pTSS for ABAKI_c25960	2	ABAKI_c25960	ABAKI_c25970
766	-	DOOR2, TSS		1	ABAKI_c25980
767	-	TSS	pTSS for ABAKI_c26000	3	ABAKI_c25980	ABAKI_c25990	ABAKI_c26000
768	+	DOOR2, TSS		1	ABAKI_c26020
769	+	TSS	pTSS for ABAKI_c26070	2	ABAKI_c26070	ABAKI_c26080
770	-	TSS	pTSS for ABAKI_c26150	3	ABAKI_c26130	ABAKI_c26140	ABAKI_c26150
771	-	TSS	pTSS for ABAKI_c26160	4	ABAKI_c26130	ABAKI_c26140	ABAKI_c26150	ABAKI_c26160
772	-	TSS	pTSS for ABAKI_c26170	5	ABAKI_c26130	ABAKI_c26140	ABAKI_c26150	ABAKI_c26160	ABAKI_c26170
773	+	DOOR2, TSS		5	ABAKI_c26180	ABAKI_c26190	ABAKI_c26200	ABAKI_c26210	ABAKI_c26220
774	+	TSS	pTSS for ABAKI_c26200	3	ABAKI_c26200	ABAKI_c26210	ABAKI_c26220
775	+	DOOR2, TSS		3	ABAKI_c26230	ABAKI_c26240	ABAKI_c26250
776	+	DOOR2, TSS		2	ABAKI_c26300	ABAKI_c26310
777	+	DOOR2, TSS		1	ABAKI_c26320
778	+	DOOR2, TSS		1	ABAKI_c26330
779	+	DOOR2, TSS		4	ABAKI_c26340	ABAKI_c26350	ABAKI_c26360	ABAKI_c26370
780	+	TSS	pTSS for ABAKI_c26370	1	ABAKI_c26370
781	+	DOOR2, TSS		2	ABAKI_c26380	ABAKI_c26390
782	+	DOOR2, TSS		3	ABAKI_c26400	ABAKI_c26410	ABAKI_c26420
783	-	DOOR2, TSS		2	ABAKI_c26430	ABAKI_c26440
784	+	DOOR2, TSS		1	ABAKI_c26510
785	-	DOOR2, TSS		1	ABAKI_c26520
786	+	DOOR2, TSS		11	ABAKI_c26530	ABAKI_c26540	ABAKI_c26550	ABAKI_c26560	ABAKI_c26570	ABAKI_c26580	ABAKI_c26590	ABAKI_c26600	ABAKI_c26610	ABAKI_c26620	ABAKI_c26630
787	+	TSS	pTSS for ABAKI_c26570	7	ABAKI_c26570	ABAKI_c26580	ABAKI_c26590	ABAKI_c26600	ABAKI_c26610	ABAKI_c26620	ABAKI_c26630
788	+	TSS	pTSS for ABAKI_c26590	5	ABAKI_c26590	ABAKI_c26600	ABAKI_c26610	ABAKI_c26620	ABAKI_c26630
789	+	TSS	pTSS for ABAKI_c26610	3	ABAKI_c26610	ABAKI_c26620	ABAKI_c26630
790	+	TSS	pTSS for ABAKI_c26630	1	ABAKI_c26630
791	+	DOOR2, TSS		2	ABAKI_c26640	ABAKI_c26650
792	+	DOOR2, TSS		1	ABAKI_c26660
793	+	DOOR2, TSS		1	ABAKI_c26670
794	-	DOOR2, TSS		1	ABAKI_c26680
795	+	DOOR2, TSS		2	ABAKI_c26690	ABAKI_c26700
796	+	TSS	pTSS for ABAKI_c26700	1	ABAKI_c26700
797	+	DOOR2, TSS		4	ABAKI_c26710	ABAKI_c26720	ABAKI_c26730	ABAKI_c26740
798	-	DOOR2, TSS		1	ABAKI_c26770
799	+	DOOR2, TSS		4	ABAKI_c26780	ABAKI_c26790	ABAKI_c26800	ABAKI_c26810
800	-	DOOR2, TSS		2	ABAKI_c26820	ABAKI_c26830
801	+	DOOR2, TSS		4	ABAKI_c26940	ABAKI_c26950	ABAKI_c26960	ABAKI_c26970
802	+	TSS	pTSS for ABAKI_c26950	3	ABAKI_c26950	ABAKI_c26960	ABAKI_c26970
803	+	TSS	pTSS for ABAKI_c26970	7	ABAKI_c26970	ABAKI_c26980	ABAKI_c26990	ABAKI_c27000	ABAKI_c27010	ABAKI_c27020	ABAKI_c27030
804	+	TSS	pTSS for ABAKI_c27040	2	ABAKI_c27040	ABAKI_c27050
805	+	TSS	pTSS for ABAKI_c27050	1	ABAKI_c27050
806	+	DOOR2, TSS		1	ABAKI_c27060
807	-	TSS	pTSS for ABAKI_c27080	2	ABAKI_c27070	ABAKI_c27080
808	-	TSS	pTSS for ABAKI_c27120	4	ABAKI_c27090	ABAKI_c27100	ABAKI_c27110	ABAKI_c27120
809	-	DOOR2, TSS		3	ABAKI_c27130	ABAKI_c27140	ABAKI_c27150
810	+	DOOR2, TSS		3	ABAKI_c27160	ABAKI_c27170	ABAKI_c27180
811	+	DOOR2, TSS		2	ABAKI_c27210	ABAKI_c27220
812	-	DOOR2, TSS		2	ABAKI_c27230	ABAKI_c27240
813	+	DOOR2, TSS		9	ABAKI_c27250	ABAKI_c27260	ABAKI_c27270	ABAKI_c27280	ABAKI_c27290	ABAKI_c27300	ABAKI_c27310	ABAKI_c27320	ABAKI_c27330
814	+	TSS	pTSS for ABAKI_c27260	8	ABAKI_c27260	ABAKI_c27270	ABAKI_c27280	ABAKI_c27290	ABAKI_c27300	ABAKI_c27310	ABAKI_c27320	ABAKI_c27330
815	+	TSS	pTSS for ABAKI_c27280	6	ABAKI_c27280	ABAKI_c27290	ABAKI_c27300	ABAKI_c27310	ABAKI_c27320	ABAKI_c27330
816	+	TSS	pTSS for ABAKI_c27320	2	ABAKI_c27320	ABAKI_c27330
817	+	DOOR2, TSS		5	ABAKI_c27400	ABAKI_c27410	ABAKI_c27420	ABAKI_c27430	ABAKI_c27440
818	+	DOOR2, TSS		1	ABAKI_c27490
819	+	DOOR2, TSS		1	ABAKI_c27500
820	+	TSS	pTSS for ABAKI_c27600	1	ABAKI_c27600
821	+	DOOR2, TSS		3	ABAKI_c27610	ABAKI_c27620	ABAKI_c27630
822	+	TSS	pTSS for ABAKI_c27620	2	ABAKI_c27620	ABAKI_c27630
823	+	DOOR2, TSS		2	ABAKI_c27640	ABAKI_c27650
824	+	TSS	pTSS for ABAKI_c27650	3	ABAKI_c27650	ABAKI_c27660	ABAKI_c27670
825	+	DOOR2, TSS		3	ABAKI_c27680	ABAKI_c27690	ABAKI_c27700
826	+	DOOR2, TSS		2	ABAKI_c27710	ABAKI_c27720
827	+	DOOR2, TSS		3	ABAKI_c27730	ABAKI_c27740	ABAKI_c27750
828	+	DOOR2, TSS		1	ABAKI_c27760
829	-	DOOR2, TSS		2	ABAKI_c27770	ABAKI_c27780
830	-	TSS	pTSS for ABAKI_c27820	1	ABAKI_c27820
831	+	DOOR2, TSS		2	ABAKI_c27830	ABAKI_c27840
832	+	DOOR2, TSS		2	ABAKI_c27850	ABAKI_c27860
833	+	DOOR2, TSS		1	ABAKI_c27880
834	-	DOOR2, TSS		1	ABAKI_c27890
835	+	DOOR2, TSS		1	ABAKI_c27900
836	-	DOOR2, TSS		2	ABAKI_c27910	ABAKI_c27920
837	-	TSS	pTSS for ABAKI_c27970	5	ABAKI_c27930	ABAKI_c27940	ABAKI_c27950	ABAKI_c27960	ABAKI_c27970
838	-	DOOR2, TSS		2	ABAKI_c27990	ABAKI_c28000
839	+	TSS	pTSS for ABAKI_c28080	1	ABAKI_c28080
840	-	DOOR2, TSS		1	ABAKI_c28090
841	+	DOOR2, TSS		1	ABAKI_c28100
842	+	DOOR2, TSS		3	ABAKI_c28110	ABAKI_c28120	ABAKI_c28130
843	+	TSS	pTSS for ABAKI_c28130	1	ABAKI_c28130
844	+	DOOR2, TSS		2	ABAKI_c28230	ABAKI_c28240
845	+	DOOR2, TSS		1	ABAKI_c28250
846	-	DOOR2, TSS		2	ABAKI_c28260	ABAKI_c28270
847	+	DOOR2, TSS		3	ABAKI_c28350	ABAKI_c28360	ABAKI_c28370
848	+	DOOR2, TSS		2	ABAKI_c28380	ABAKI_c28390
849	+	TSS	pTSS for ABAKI_c28530	4	ABAKI_c28530	ABAKI_c28540	ABAKI_c28550	ABAKI_c28560
850	+	DOOR2, TSS		2	ABAKI_c28620	ABAKI_c28630
851	+	DOOR2, TSS		1	ABAKI_c28640
852	+	DOOR2, TSS		1	ABAKI_c28660
853	-	TSS	pTSS for ABAKI_c28740	8	ABAKI_c28670	ABAKI_c28680	ABAKI_c28690	ABAKI_c28700	ABAKI_c28710	ABAKI_c28720	ABAKI_c28730	ABAKI_c28740
854	+	DOOR2, TSS		1	ABAKI_c28750
855	+	DOOR2, TSS		5	ABAKI_c28760	ABAKI_c28770	ABAKI_c28780	ABAKI_c28790	ABAKI_c28800
856	+	TSS	pTSS for ABAKI_c28770	4	ABAKI_c28770	ABAKI_c28780	ABAKI_c28790	ABAKI_c28800
857	+	TSS	pTSS for ABAKI_c28800	1	ABAKI_c28800
858	+	DOOR2, TSS		4	ABAKI_c28810	ABAKI_c28820	ABAKI_c28830	ABAKI_c28840
859	+	DOOR2, TSS		3	ABAKI_c28900	ABAKI_c28910	ABAKI_c28920
860	-	TSS	pTSS for ABAKI_c29010	2	ABAKI_c29000	ABAKI_c29010
861	+	TSS	pTSS for ABAKI_c29020	1	ABAKI_c29020
862	+	DOOR2, TSS		1	ABAKI_c29030
863	+	DOOR2, TSS		2	ABAKI_c29040	ABAKI_c29050
864	+	DOOR2, TSS		1	ABAKI_c29150
865	+	DOOR2, TSS		3	ABAKI_c29160	ABAKI_c29170	ABAKI_c29180
866	-	DOOR2, TSS		1	ABAKI_c29190
867	+	DOOR2, TSS		8	ABAKI_c29200	ABAKI_c29210	ABAKI_c29220	ABAKI_c29230	ABAKI_c29240	ABAKI_c29250	ABAKI_c29260	ABAKI_c29270
868	+	TSS	iTSS for ABAKI_c29220	5	ABAKI_c29230	ABAKI_c29240	ABAKI_c29250	ABAKI_c29260	ABAKI_c29270
869	+	TSS	pTSS for ABAKI_c29260	2	ABAKI_c29260	ABAKI_c29270
870	+	DOOR2, TSS		1	ABAKI_c29290
871	-	DOOR2, TSS		1	ABAKI_c29300
872	+	DOOR2, TSS		2	ABAKI_c29310	ABAKI_c29320
873	+	DOOR2, TSS		3	ABAKI_c29330	ABAKI_c29340	ABAKI_c29350
874	+	TSS	pTSS for ABAKI_c29360	3	ABAKI_c29360	ABAKI_c29370	ABAKI_c29380
875	+	DOOR2, TSS		6	ABAKI_c29390	ABAKI_c29400	ABAKI_c29410	ABAKI_c29420	ABAKI_c29430	ABAKI_c29440
876	+	TSS	pTSS for ABAKI_c29450	1	ABAKI_c29450
877	+	TSS	pTSS for ABAKI_c29460	1	ABAKI_c29460
878	+	TSS	pTSS for ABAKI_c29470	6	ABAKI_c29470	ABAKI_c29480	ABAKI_c29490	ABAKI_c29500	ABAKI_c29510	ABAKI_c29520
879	+	TSS	pTSS for ABAKI_c29530	5	ABAKI_c29530	ABAKI_c29540	ABAKI_c29550	ABAKI_c29560	ABAKI_c29570
880	+	DOOR2, TSS		1	ABAKI_c29580
881	+	TSS	pTSS for ABAKI_c29590	5	ABAKI_c29590	ABAKI_c29600	ABAKI_c29610	ABAKI_c29620	ABAKI_c29630
882	+	DOOR2, TSS		1	ABAKI_c29620
883	+	TSS	pTSS for ABAKI_c29640	3	ABAKI_c29640	ABAKI_c29650	ABAKI_c29660
884	+	TSS	pTSS for ABAKI_c29670	1	ABAKI_c29670
885	+	TSS	pTSS for ABAKI_c29680	5	ABAKI_c29680	ABAKI_c29690	ABAKI_c29700	ABAKI_c29710	ABAKI_c29720
886	+	DOOR2, TSS		8	ABAKI_c29730	ABAKI_c29740	ABAKI_c29750	ABAKI_c29760	ABAKI_c29770	ABAKI_c29780	ABAKI_c29790	ABAKI_c29800
887	+	TSS	pTSS for ABAKI_c29770	4	ABAKI_c29770	ABAKI_c29780	ABAKI_c29790	ABAKI_c29800
888	-	DOOR2, TSS		1	ABAKI_c29810
889	+	DOOR2, TSS		6	ABAKI_c29820	ABAKI_c29830	ABAKI_c29840	ABAKI_c29850	ABAKI_c29860	ABAKI_c29870
890	+	DOOR2, TSS		2	ABAKI_c29880	ABAKI_c29890
891	+	TSS	pTSS for ABAKI_c29900	5	ABAKI_c29900	ABAKI_c29910	ABAKI_c29920	ABAKI_c29930	ABAKI_c29940
892	+	DOOR2, TSS		4	ABAKI_c29960	ABAKI_c29970	ABAKI_c29980	ABAKI_c29990
893	+	TSS	pTSS for ABAKI_c30000	6	ABAKI_c30000	ABAKI_c30010	ABAKI_c30020	ABAKI_c30030	ABAKI_c30040	ABAKI_c30050
894	+	TSS	pTSS for ABAKI_c30030	3	ABAKI_c30030	ABAKI_c30040	ABAKI_c30050
895	+	TSS	pTSS for ABAKI_c30040	2	ABAKI_c30040	ABAKI_c30050
896	+	DOOR2, TSS		3	ABAKI_c30060	ABAKI_c30070	ABAKI_c30080
897	-	DOOR2, TSS		2	ABAKI_c30120	ABAKI_c30130
898	+	DOOR2, TSS		2	ABAKI_c30140	ABAKI_c30150
899	+	DOOR2, TSS		1	ABAKI_c30170
900	+	TSS	pTSS for ABAKI_c30180	2	ABAKI_c30180	ABAKI_c30190
901	+	TSS	pTSS for ABAKI_c30270	1	ABAKI_c30270
902	+	DOOR2, TSS		3	ABAKI_c30280	ABAKI_c30290	ABAKI_c30300
903	+	DOOR2, TSS		3	ABAKI_c30380	ABAKI_c30390	ABAKI_c30400
904	+	TSS	pTSS for ABAKI_c30390	2	ABAKI_c30390	ABAKI_c30400
905	+	DOOR2, TSS		1	ABAKI_c30430
906	-	DOOR2, TSS		1	ABAKI_c30440
907	-	DOOR2, TSS		3	ABAKI_c30450	ABAKI_c30460	ABAKI_c30470
908	-	TSS	pTSS for ABAKI_c30460	2	ABAKI_c30450	ABAKI_c30460
909	-	DOOR2, TSS		1	ABAKI_c30480
910	+	DOOR2, TSS		1	ABAKI_c30490
911	+	DOOR2, TSS		1	ABAKI_c30500
912	-	DOOR2, TSS		4	ABAKI_c30510	ABAKI_c30520	ABAKI_c30530	ABAKI_c30540
913	-	TSS	pTSS for ABAKI_c30520	2	ABAKI_c30510	ABAKI_c30520
914	-	DOOR2, TSS		1	ABAKI_c30550
915	+	DOOR2, TSS		1	ABAKI_c30560
916	-	DOOR2, TSS		1	ABAKI_c30570
917	+	DOOR2, TSS		2	ABAKI_c30580	ABAKI_c30590
918	-	DOOR2, TSS		2	ABAKI_c30600	ABAKI_c30610
919	+	DOOR2, TSS		3	ABAKI_c30620	ABAKI_c30630	ABAKI_c30640
920	+	DOOR2, TSS		1	ABAKI_c30740
921	+	DOOR2, TSS		3	ABAKI_c30750	ABAKI_c30760	ABAKI_c30770
922	-	DOOR2, TSS		1	ABAKI_c30780
923	-	DOOR2, TSS		3	ABAKI_c30800	ABAKI_c30810	ABAKI_c30820
924	+	DOOR2, TSS		2	ABAKI_c30830	ABAKI_c30840
925	-	DOOR2, TSS		1	ABAKI_c30870
926	+	DOOR2, TSS		1	ABAKI_c30880
927	-	DOOR2, TSS		1	ABAKI_c30890
928	-	DOOR2, TSS		2	ABAKI_c30900	ABAKI_c30910
929	+	DOOR2, TSS		1	ABAKI_c30920
930	-	DOOR2, TSS		2	ABAKI_c30930	ABAKI_c30940
931	-	DOOR2, TSS		1	ABAKI_c30970
932	+	DOOR2, TSS		1	ABAKI_c31000
933	+	TSS	pTSS for ABAKI_c31010	2	ABAKI_c31010	ABAKI_c31020
934	+	DOOR2, TSS		2	ABAKI_c31050	ABAKI_c31060
935	+	DOOR2, TSS		3	ABAKI_c31070	ABAKI_c31080	ABAKI_c31090
936	+	DOOR2, TSS		1	ABAKI_c31110
937	-	DOOR2, TSS		2	ABAKI_c31120	ABAKI_c31130
938	+	DOOR2, TSS		1	ABAKI_c31140
939	+	DOOR2, TSS		2	ABAKI_c31160	ABAKI_c31170
940	-	DOOR2, TSS		2	ABAKI_c31180	ABAKI_c31190
941	+	DOOR2, TSS		1	ABAKI_c31200
942	+	DOOR2, TSS		3	ABAKI_c31260	ABAKI_c31270	ABAKI_c31280
943	+	DOOR2, TSS		4	ABAKI_c31350	ABAKI_c31360	ABAKI_c31370	ABAKI_c31380
944	-	DOOR2, TSS		1	ABAKI_c31390
945	-	DOOR2, TSS		1	ABAKI_c31410
946	-	DOOR2, TSS		1	ABAKI_c31430
947	+	DOOR2, TSS		10	ABAKI_c31460	ABAKI_c31470	ABAKI_c31480	ABAKI_c31490	ABAKI_c31500	ABAKI_c31510	ABAKI_c31520	ABAKI_c31530	ABAKI_c31540	ABAKI_c31550
948	-	DOOR2, TSS		1	ABAKI_c31560
949	+	TSS	pTSS for ABAKI_c31670	2	ABAKI_c31670	ABAKI_c31680
950	+	DOOR2, TSS		2	ABAKI_c31690	ABAKI_c31700
951	+	TSS	pTSS for ABAKI_c31700	1	ABAKI_c31700
952	-	DOOR2, TSS		2	ABAKI_c31750	ABAKI_c31760
953	+	DOOR2, TSS		2	ABAKI_c31890	ABAKI_c31900
954	+	TSS	pTSS for ABAKI_c31900	1	ABAKI_c31900
955	+	TSS	iTSS for ABAKI_c31930	1	ABAKI_c31930
956	-	DOOR2, TSS		1	ABAKI_c31960
957	+	DOOR2, TSS		4	ABAKI_c32030	ABAKI_c32040	ABAKI_c32050	ABAKI_c32060
958	+	DOOR2, TSS		1	ABAKI_c32070
959	-	DOOR2, TSS		3	ABAKI_c32100	ABAKI_c32110	ABAKI_c32120
960	+	DOOR2, TSS		2	ABAKI_c32180	ABAKI_c32190
961	+	DOOR2, TSS		2	ABAKI_c32220	ABAKI_c32230
962	+	DOOR2, TSS		1	ABAKI_c32240
963	-	DOOR2, TSS		1	ABAKI_c32250
964	+	DOOR2, TSS		6	ABAKI_c32260	ABAKI_c32270	ABAKI_c32280	ABAKI_c32290	ABAKI_c32300	ABAKI_c32310
965	-	DOOR2, TSS		1	ABAKI_c32350
966	+	DOOR2, TSS		2	ABAKI_c32390	ABAKI_c32400
967	-	DOOR2, TSS		1	ABAKI_c32410
968	-	DOOR2, TSS		1	ABAKI_c32420
969	-	DOOR2, TSS		1	ABAKI_c32430
970	+	DOOR2, TSS		1	ABAKI_c32440
971	-	DOOR2, TSS		1	ABAKI_c32480
972	+	DOOR2, TSS		1	ABAKI_c32500
973	+	DOOR2, TSS		2	ABAKI_c32510	ABAKI_c32520
974	+	DOOR2, TSS		1	ABAKI_c32530
975	-	DOOR2, TSS		1	ABAKI_c32550
976	+	DOOR2, TSS		3	ABAKI_c32560	ABAKI_c32570	ABAKI_c32580
977	+	TSS	iTSS for ABAKI_c32570	2	ABAKI_c32570	ABAKI_c32580
978	+	DOOR2, TSS		2	ABAKI_c32590	ABAKI_c32600
979	+	DOOR2, TSS		2	ABAKI_c32610	ABAKI_c32620
980	+	TSS	pTSS for ABAKI_c32630	1	ABAKI_c32630
981	-	DOOR2, TSS		1	ABAKI_c32650
982	+	TSS	pTSS for ABAKI_c32690	1	ABAKI_c32690
983	-	TSS	pTSS for ABAKI_c32720	2	ABAKI_c32710	ABAKI_c32720
984	+	DOOR2, TSS		13	ABAKI_c32750	ABAKI_c32760	ABAKI_c32770	ABAKI_c32780	ABAKI_c32790	ABAKI_c32800	ABAKI_c32810	ABAKI_c32820	ABAKI_c32830	ABAKI_c32840	ABAKI_c32850	ABAKI_c32860	ABAKI_c32870
985	+	TSS	pTSS for ABAKI_c32850	3	ABAKI_c32850	ABAKI_c32860	ABAKI_c32870
986	+	DOOR2, TSS		1	ABAKI_c32880
987	+	DOOR2, TSS		1	ABAKI_c32890
988	+	DOOR2, TSS		2	ABAKI_c32900	ABAKI_c32910
989	-	DOOR2, TSS		4	ABAKI_c32920	ABAKI_c32930	ABAKI_c32940	ABAKI_c32950
990	+	DOOR2, TSS		1	ABAKI_c32980
991	+	DOOR2, TSS		3	ABAKI_c32990	ABAKI_c33000	ABAKI_c33010
992	+	TSS	pTSS for ABAKI_c33010	4	ABAKI_c33010	ABAKI_c33020	ABAKI_c33030	ABAKI_c33040
993	+	DOOR2, TSS		5	ABAKI_c33050	ABAKI_c33060	ABAKI_c33070	ABAKI_c33080	ABAKI_c33090
994	-	DOOR2, TSS		1	ABAKI_c33100
995	-	DOOR2, TSS		1	ABAKI_c33110
996	+	DOOR2, TSS		1	ABAKI_c33210
997	+	DOOR2, TSS		2	ABAKI_c33260	ABAKI_c33270
998	+	TSS	pTSS for ABAKI_c33270	1	ABAKI_c33270
999	+	DOOR2, TSS		4	ABAKI_c33280	ABAKI_c33290	ABAKI_c33300	ABAKI_c33310
1000	-	DOOR2, TSS		1	ABAKI_c33320
1001	+	DOOR2, TSS		2	ABAKI_c33330	ABAKI_c33340
1002	-	DOOR2, TSS		3	ABAKI_c33350	ABAKI_c33360	ABAKI_c33370
1003	-	TSS	pTSS for ABAKI_c33360	2	ABAKI_c33350	ABAKI_c33360
1004	-	DOOR2, TSS		1	ABAKI_c33390
1005	+	DOOR2, TSS		1	ABAKI_c33400
1006	+	DOOR2, TSS		1	ABAKI_c33410
1007	+	DOOR2, TSS		2	ABAKI_c33420	ABAKI_c33430
1008	+	DOOR2, TSS		1	ABAKI_c33440
1009	+	DOOR2, TSS		3	ABAKI_c33450	ABAKI_c33460	ABAKI_c33470
1010	+	TSS	pTSS for ABAKI_c33460	2	ABAKI_c33460	ABAKI_c33470
1011	-	DOOR2, TSS		1	ABAKI_c33490
1012	+	DOOR2, TSS		1	ABAKI_c33500
1013	+	DOOR2, TSS		3	ABAKI_c33530	ABAKI_c33540	ABAKI_c33550
1014	+	TSS	pTSS for ABAKI_c33550	1	ABAKI_c33550
1015	+	DOOR2, TSS		7	ABAKI_c33560	ABAKI_c33570	ABAKI_c33580	ABAKI_c33590	ABAKI_c33600	ABAKI_c33610	ABAKI_c33620
1016	+	DOOR2, TSS		9	ABAKI_c33640	ABAKI_c33650	ABAKI_c33660	ABAKI_c33670	ABAKI_c33680	ABAKI_c33690	ABAKI_c33700	ABAKI_c33710	ABAKI_c33720
1017	+	TSS	pTSS for ABAKI_c33690	4	ABAKI_c33690	ABAKI_c33700	ABAKI_c33710	ABAKI_c33720
1018	+	TSS	pTSS for ABAKI_c33700	3	ABAKI_c33700	ABAKI_c33710	ABAKI_c33720
1019	+	TSS	pTSS for ABAKI_c33730	8	ABAKI_c33730	ABAKI_c33740	ABAKI_c33750	ABAKI_c33760	ABAKI_c33770	ABAKI_c33780	ABAKI_c33790	ABAKI_c33800
1020	-	DOOR2, TSS		2	ABAKI_c33810	ABAKI_c33820
1021	+	DOOR2, TSS		2	ABAKI_c33830	ABAKI_c33840
1022	-	DOOR2, TSS		1	ABAKI_c33850
1023	-	TSS	pTSS for ABAKI_c33870	3	ABAKI_c33850	ABAKI_c33860	ABAKI_c33870
1024	-	DOOR2, TSS		1	ABAKI_c33880
1025	+	DOOR2, TSS		3	ABAKI_c33890	ABAKI_c33900	ABAKI_c33910
1026	-	DOOR2, TSS		1	ABAKI_c33920
1027	+	DOOR2, TSS		2	ABAKI_c33930	ABAKI_c33940
1028	+	DOOR2, TSS		3	ABAKI_c33960	ABAKI_c33970	ABAKI_c33980
1029	-	DOOR2, TSS		2	ABAKI_c33990	ABAKI_c34000
1030	+	DOOR2, TSS		4	ABAKI_c34010	ABAKI_c34020	ABAKI_c34030	ABAKI_c34040
1031	+	TSS	pTSS for ABAKI_c34030	1	ABAKI_c34030
1032	+	TSS	pTSS for ABAKI_c34040	1	ABAKI_c34040
1033	-	DOOR2, TSS		2	ABAKI_c34070	ABAKI_c34080
1034	+	TSS	pTSS for ABAKI_c34100	1	ABAKI_c34100
1035	+	DOOR2, TSS		1	ABAKI_c34120
1036	+	DOOR2, TSS		1	ABAKI_c34130
1037	+	DOOR2, TSS		5	ABAKI_c34140	ABAKI_c34150	ABAKI_c34160	ABAKI_c34170	ABAKI_c34180
1038	+	TSS	pTSS for ABAKI_c34170	2	ABAKI_c34170	ABAKI_c34180
1039	+	TSS	pTSS for ABAKI_c34180	1	ABAKI_c34180
1040	-	DOOR2, TSS		2	ABAKI_c34190	ABAKI_c34200
1041	+	DOOR2, TSS		2	ABAKI_c34210	ABAKI_c34220
1042	-	DOOR2, TSS		2	ABAKI_c34230	ABAKI_c34240
1043	+	DOOR2, TSS		5	ABAKI_c34250	ABAKI_c34260	ABAKI_c34270	ABAKI_c34280	ABAKI_c34290
1044	+	TSS	pTSS for ABAKI_c34260	4	ABAKI_c34260	ABAKI_c34270	ABAKI_c34280	ABAKI_c34290
1045	+	TSS	pTSS for ABAKI_c34280	2	ABAKI_c34280	ABAKI_c34290
1046	+	TSS	pTSS for ABAKI_c34300	2	ABAKI_c34300	ABAKI_c34310
1047	+	DOOR2, TSS		2	ABAKI_c34350	ABAKI_c34360
1048	+	TSS	pTSS for ABAKI_c34400	1	ABAKI_c34400
1049	+	DOOR2, TSS		3	ABAKI_c34410	ABAKI_c34420	ABAKI_c34430
1050	+	TSS	pTSS for ABAKI_c34650	1	ABAKI_c34650
1051	+	DOOR2, TSS		1	ABAKI_c34670
1052	+	DOOR2, TSS		2	ABAKI_c34680	ABAKI_c34690
1053	+	TSS	pTSS for ABAKI_c34710	1	ABAKI_c34710
1054	+	DOOR2, TSS		2	ABAKI_c34720	ABAKI_c34730
1055	+	DOOR2, TSS		19	ABAKI_c34740	ABAKI_c34750	ABAKI_c34760	ABAKI_c34770	ABAKI_c34780	ABAKI_c34790	ABAKI_c34800	ABAKI_c34810	ABAKI_c34820	ABAKI_c34830	ABAKI_c34840	ABAKI_c34850	ABAKI_c34860	ABAKI_c34870	ABAKI_c34880	ABAKI_c34890	ABAKI_c34900	ABAKI_c34910	ABAKI_c34920
1056	+	TSS	pTSS for ABAKI_c34760	17	ABAKI_c34760	ABAKI_c34770	ABAKI_c34780	ABAKI_c34790	ABAKI_c34800	ABAKI_c34810	ABAKI_c34820	ABAKI_c34830	ABAKI_c34840	ABAKI_c34850	ABAKI_c34860	ABAKI_c34870	ABAKI_c34880	ABAKI_c34890	ABAKI_c34900	ABAKI_c34910	ABAKI_c34920
1057	+	TSS	pTSS for ABAKI_c34990	2	ABAKI_c34990	ABAKI_c35000
1058	+	TSS	pTSS for ABAKI_c35020	1	ABAKI_c35020
1059	+	DOOR2, TSS		1	ABAKI_c35040
1060	+	DOOR2, TSS		1	ABAKI_c35050
1061	+	DOOR2, TSS		3	ABAKI_c35060	ABAKI_c35070	ABAKI_c35080
1062	+	DOOR2, TSS		1	ABAKI_c35100
1063	+	DOOR2, TSS		1	ABAKI_c35170
1064	+	DOOR2, TSS		5	ABAKI_c35180	ABAKI_c35190	ABAKI_c35200	ABAKI_c35210	ABAKI_c35220
1065	+	TSS	pTSS for ABAKI_c35200	3	ABAKI_c35200	ABAKI_c35210	ABAKI_c35220
1066	+	TSS	pTSS for ABAKI_c35210	2	ABAKI_c35210	ABAKI_c35220
1067	-	DOOR2, TSS		1	ABAKI_c35230
1068	-	DOOR2, TSS		3	ABAKI_c35280	ABAKI_c35290	ABAKI_c35300
1069	+	DOOR2, TSS		2	ABAKI_c35310	ABAKI_c35320
1070	+	DOOR2, TSS		10	ABAKI_c35350	ABAKI_c35360	ABAKI_c35370	ABAKI_c35380	ABAKI_c35390	ABAKI_c35400	ABAKI_c35410	ABAKI_c35420	ABAKI_c35430	ABAKI_c35440
1071	+	TSS	pTSS for ABAKI_c35360	9	ABAKI_c35360	ABAKI_c35370	ABAKI_c35380	ABAKI_c35390	ABAKI_c35400	ABAKI_c35410	ABAKI_c35420	ABAKI_c35430	ABAKI_c35440
1072	+	DOOR2, TSS		7	ABAKI_c35450	ABAKI_c35460	ABAKI_c35470	ABAKI_c35480	ABAKI_c35490	ABAKI_c35500	ABAKI_c35510
1073	+	TSS	pTSS for ABAKI_c35490	5	ABAKI_c35490	ABAKI_c35500	ABAKI_c35510	ABAKI_c35520	ABAKI_c35530
1074	-	DOOR2, TSS		1	ABAKI_c35540
1075	+	DOOR2, TSS		2	ABAKI_c35550	ABAKI_c35560
1076	+	TSS	pTSS for ABAKI_c35560	1	ABAKI_c35560
1077	-	DOOR2, TSS		2	ABAKI_c35660	ABAKI_c35670
1078	+	DOOR2, TSS		1	ABAKI_c35680
1079	+	DOOR2, TSS		2	ABAKI_c35730	ABAKI_c35740
1080	+	DOOR2, TSS		1	ABAKI_c35750
1081	+	DOOR2, TSS		4	ABAKI_c35760	ABAKI_c35770	ABAKI_c35780	ABAKI_c35790
1082	+	TSS	pTSS for ABAKI_c35810	2	ABAKI_c35810	ABAKI_c35820
1083	-	DOOR2, TSS		1	ABAKI_c35830
1084	+	DOOR2, TSS		2	ABAKI_c35840	ABAKI_c35850
1085	-	TSS	pTSS for ABAKI_c35920	7	ABAKI_c35860	ABAKI_c35870	ABAKI_c35880	ABAKI_c35890	ABAKI_c35900	ABAKI_c35910	ABAKI_c35920
1086	-	TSS	pTSS for ABAKI_c35930	8	ABAKI_c35860	ABAKI_c35870	ABAKI_c35880	ABAKI_c35890	ABAKI_c35900	ABAKI_c35910	ABAKI_c35920	ABAKI_c35930
1087	-	TSS	pTSS for ABAKI_c35970	12	ABAKI_c35860	ABAKI_c35870	ABAKI_c35880	ABAKI_c35890	ABAKI_c35900	ABAKI_c35910	ABAKI_c35920	ABAKI_c35930	ABAKI_c35940	ABAKI_c35950	ABAKI_c35960	ABAKI_c35970
1088	-	TSS	pTSS for ABAKI_c35980	1	ABAKI_c35980
1089	-	TSS	pTSS for ABAKI_c35990	1	ABAKI_c35990
1090	+	DOOR2, TSS		7	ABAKI_c36000	ABAKI_c36010	ABAKI_c36020	ABAKI_c36030	ABAKI_c36040	ABAKI_c36050	ABAKI_c36060
1091	+	DOOR2, TSS		1	ABAKI_c36070
1092	+	TSS	pTSS for ABAKI_c36080	1	ABAKI_c36080
1093	+	TSS	pTSS for ABAKI_c36140	1	ABAKI_c36140
1094	+	TSS	pTSS for ABAKI_c36150	2	ABAKI_c36150	ABAKI_c36160
1095	+	DOOR2, TSS		2	ABAKI_c36180	ABAKI_c36190
1096	-	TSS	pTSS for ABAKI_c36230	2	ABAKI_c36220	ABAKI_c36230
1097	-	DOOR2, TSS		1	ABAKI_c36250
1098	-	DOOR2, TSS		1	ABAKI_c36310
1099	+	DOOR2, TSS		1	ABAKI_c36320
1100	-	DOOR2, TSS		1	ABAKI_c36330
1101	-	TSS	pTSS for ABAKI_c36350	3	ABAKI_c36330	ABAKI_c36340	ABAKI_c36350
1102	+	DOOR2, TSS		2	ABAKI_c36380	ABAKI_c36390
1103	+	DOOR2, TSS		3	ABAKI_c36410	ABAKI_c36420	ABAKI_c36430
1104	+	TSS	pTSS for ABAKI_c36470	1	ABAKI_c36470
1105	-	DOOR2, TSS		1	ABAKI_c36480
1106	+	TSS	pTSS for ABAKI_c36630	1	ABAKI_c36630
1107	+	DOOR2, TSS		2	ABAKI_c36680	ABAKI_c36690
1108	+	DOOR2, TSS		2	ABAKI_c36710	ABAKI_c36720
1109	+	DOOR2, TSS		4	ABAKI_c36800	ABAKI_c36810	ABAKI_c36820	ABAKI_c36830
1110	+	DOOR2, TSS		3	ABAKI_c36860	ABAKI_c36870	ABAKI_c36880
1111	+	TSS	pTSS for ABAKI_c36890	1	ABAKI_c36890
1112	+	DOOR2, TSS		4	ABAKI_c36900	ABAKI_c36910	ABAKI_c36920	ABAKI_c36930
1113	+	DOOR2, TSS		2	ABAKI_c36980	ABAKI_c36990
1114	-	DOOR2, TSS		2	ABAKI_c37040	ABAKI_c37050
1115	+	DOOR2, TSS		8	ABAKI_c37170	ABAKI_c37180	ABAKI_c37190	ABAKI_c37200	ABAKI_c37210	ABAKI_c37220	ABAKI_c37230	ABAKI_c37240
1116	+	TSS	pTSS for ABAKI_c37230	2	ABAKI_c37230	ABAKI_c37240
1117	+	DOOR2, TSS		4	ABAKI_c37290	ABAKI_c37300	ABAKI_c37310	ABAKI_c37320
1118	+	TSS	pTSS for ABAKI_c37330	1	ABAKI_c37330
1119	+	DOOR2, TSS		1	ABAKI_c37340
1120	-	DOOR2, TSS		1	ABAKI_c37350
1121	-	DOOR2, TSS		1	ABAKI_c37390
1122	+	DOOR2, TSS		4	ABAKI_c37400	ABAKI_c37410	ABAKI_c37420	ABAKI_c37430
1123	+	TSS	pTSS for ABAKI_c37430	1	ABAKI_c37430
1124	-	TSS	pTSS for ABAKI_c37460	3	ABAKI_c37440	ABAKI_c37450	ABAKI_c37460
1125	+	DOOR2, TSS		1	ABAKI_c37470
1126	+	DOOR2, TSS		18	ABAKI_c37480	ABAKI_c37490	ABAKI_c37500	ABAKI_c37510	ABAKI_c37520	ABAKI_c37530	ABAKI_c37540	ABAKI_c37550	ABAKI_c37560	ABAKI_c37570	ABAKI_c37580	ABAKI_c37590	ABAKI_c37600	ABAKI_c37610	ABAKI_c37620	ABAKI_c37630	ABAKI_c37640	ABAKI_c37650
1127	+	TSS	pTSS for ABAKI_c37490	17	ABAKI_c37490	ABAKI_c37500	ABAKI_c37510	ABAKI_c37520	ABAKI_c37530	ABAKI_c37540	ABAKI_c37550	ABAKI_c37560	ABAKI_c37570	ABAKI_c37580	ABAKI_c37590	ABAKI_c37600	ABAKI_c37610	ABAKI_c37620	ABAKI_c37630	ABAKI_c37640	ABAKI_c37650
1128	-	DOOR2, TSS		1	ABAKI_c37660
1129	+	DOOR2, TSS		9	ABAKI_c37670	ABAKI_c37680	ABAKI_c37690	ABAKI_c37700	ABAKI_c37710	ABAKI_c37720	ABAKI_c37730	ABAKI_c37740	ABAKI_c37750
1130	-	DOOR2, TSS		2	ABAKI_c37770	ABAKI_c37780
1131	+	DOOR2, TSS		3	ABAKI_c37850	ABAKI_c37860	ABAKI_c37870
1132	-	DOOR2, TSS		2	ABAKI_c37880	ABAKI_c37890
1133	-	TSS	pTSS for ABAKI_c37930	2	ABAKI_c37920	ABAKI_c37930
1134	+	DOOR2, TSS		3	ABAKI_c37940	ABAKI_c37950	ABAKI_c37960
1135	+	DOOR2, TSS		2	ABAKI_c37970	ABAKI_c37980
1136	+	DOOR2, TSS		4	ABAKI_c38050	ABAKI_c38060	ABAKI_c38070	ABAKI_c38080
1137	+	DOOR2, TSS		2	ABAKI_c38100	ABAKI_c38110
1138	-	DOOR2, TSS		1	ABAKI_c38140
1139	+	TSS	pTSS for ABAKI_c38180	1	ABAKI_c38180
1140	-	TSS	pTSS for ABAKI_c38250	5	ABAKI_c38210	ABAKI_c38220	ABAKI_c38230	ABAKI_c38240	ABAKI_c38250
1141	+	DOOR2, TSS		2	ABAKI_c38290	ABAKI_c38300
1142	-	DOOR2, TSS		1	ABAKI_c38340
1143	+	TSS	pTSS for ABAKI_c38380	1	ABAKI_c38380
1144	+	DOOR2, TSS		1	ABAKI_c38420
1145	-	TSS	pTSS for ABAKI_c38450	2	ABAKI_c38440	ABAKI_c38450
1146	-	TSS	pTSS for ABAKI_c38460	3	ABAKI_c38440	ABAKI_c38450	ABAKI_c38460
1147	-	DOOR2, TSS		4	ABAKI_c38440	ABAKI_c38450	ABAKI_c38460	ABAKI_c38470
1148	+	DOOR2, TSS		2	ABAKI_c38580	ABAKI_c38590
1149	+	DOOR2, TSS		6	ABAKI_c38600	ABAKI_c38610	ABAKI_c38620	ABAKI_c38630	ABAKI_c38640	ABAKI_c38650
1150	+	DOOR2, TSS		1	ABAKI_c38690
1151	-	DOOR2, TSS		5	ABAKI_c38900	ABAKI_c38910	ABAKI_c38920	ABAKI_c38930	ABAKI_c38940
1152	+	DOOR2, TSS		1	ABAKI_c38950
1153	-	DOOR2, TSS		2	ABAKI_c39100	ABAKI_c39110
1154	-	TSS	pTSS for ABAKI_c39110	4	ABAKI_c39080	ABAKI_c39090	ABAKI_c39100	ABAKI_c39110
1155	+	DOOR2, TSS		3	ABAKI_c39140	ABAKI_c39150	ABAKI_c39160
1156	+	DOOR2, TSS		5	ABAKI_c39170	ABAKI_c39180	ABAKI_c39190	ABAKI_c39200	ABAKI_c39210
1157	-	DOOR2, TSS		1	ABAKI_c39250
1158	+	DOOR2, TSS		2	ABAKI_c39270	ABAKI_c39280
1159	+	DOOR2, TSS		2	ABAKI_c39290	ABAKI_c39300
1160	-	DOOR2, TSS		3	ABAKI_c39310	ABAKI_c39320	ABAKI_c39330
1161	-	TSS	pTSS for ABAKI_c39320	2	ABAKI_c39310	ABAKI_c39320
1162	+	DOOR2, TSS		3	ABAKI_c39340	ABAKI_c39350	ABAKI_c39360
1163	+	DOOR2, TSS		1	ABAKI_c39370
1164	+	DOOR2, TSS		1	ABAKI_c39380
